# Supplementary material for: Risk Factors for Delirium and Cognitive Decline Following Coronary Artery Bypass Grafting Surgery: A Systematic Review and Meta‐Analysis
Source: PubMed Central journal article supplement (PMC7763731; doi:10.1161/jaha.120.017275), 2020-11-07
Supplement: JAH3-9-e017275-s001.pdf [file JAH3-9-e017275-s001.pdf]

# **SUPPLEMENTAL MATERIAL**

## Data S1.

### Quality Assessment Tool

#### Critical Appraisal Checklist for Cohort Studies & Studies Reporting Prevalence Data

This checklist and scoring instructions, was developed for the purpose of our meta-analysis using checklists created by the Joanna Briggs Institute <sup>21, 22</sup>.

2 points: Sufficiently fulfilled

1 point: Partially fulfilled or unclear

0 points: Unfulfilled or not reported

|                                                                                                                                                                                                                                            | 2 | 1 | 0 |
|--------------------------------------------------------------------------------------------------------------------------------------------------------------------------------------------------------------------------------------------|---|---|---|
| 1. Were the study participants and the setting described in detail (i.e., sample size, sex proportion, age, recruitment hospital)?                                                                                                         |   |   |   |
| 2. Were valid and reliable methods used for the identification of the condition (i.e., cognitive decline or delirium)?*                                                                                                                    |   |   |   |
| 3. Was the condition measured in a standard, reliable way for all participants (i.e., were the assessors who administered the measures adequately trained)? If there was more than one assessor, were they similar in ability/experience?* |   |   |   |
| 4. Were appropriate procedures in place to minimise attrition?                                                                                                                                                                             |   |   |   |
| 5. Was the follow-up time reported?                                                                                                                                                                                                        |   |   |   |
| 6. Was follow up complete, and if not, were the reasons to loss to follow-up described (i.e., was there a clear and justifiable description of why participants dropped out or were excluded from the analysis)?                           |   |   |   |
| Notes:                                                                                                                                                                                                                                     |   |   |   |

\*For studies that reported data for more than one outcome (i.e., cognitive impairment and delirium) the point scheme was relative to all outcomes. That is, a study would only score 2 on these items if all outcomes/conditions were identified using valid and reliable tests (item 2), in a valid and reliable manner (item 3).

**Overall Appraisal Grade: /12**

## Scoring Instructions

### **1. Were the study participants and the setting described in detail (i.e., sample size, sex proportion, age, recruitment hospital)?**

The study sample should be described in sufficient detail so that other researchers can determine if it is comparable to the population of interest to them. That is, did the researchers provide details on sample size, sex proportion, age and hospital recruited from for either the total sample at baseline, or the sample of participants included in the analyses?

- 2 = All details reported
- 1 = Some details reported
- 0 = No details reported

### **2. Were valid and reliable methods used for the identification of the condition (i.e., cognitive impairment or delirium)?**

Here we are looking for measurement or classification bias. Many health problems are not easily diagnosed or defined and some measures may not be capable of including or excluding appropriate levels or stages of the health problem. If the outcomes were assessed based on existing definitions or diagnostic criteria, then the answer to this question is likely to be yes. If the outcomes were assessed using observer reported, or self-reported scales, the risk of over- or under-reporting is increased, and objectivity is compromised. Importantly, determine if the measurement tools used were validated instruments as this has a significant impact on outcome assessment validity.

Studies that reported only delirium data were assigned 2 points for this item if they used a standardized cognition or delirium assessment, and 1 point if they used a recognized criteria or guidelines (e.g., the Society of Thoracic Surgeons (STS) definition or The Diagnostic and Statistical Manual of Mental Disorders criteria.

- 2 = All measures were standardized and validated
- 1 = Some measures were standardized and validated
- 0 = No measures were standardized and validated

### **3. Was the condition measured in a standard, reliable way for all participants (i.e., were the assessors who administered the measures adequately trained)? If there was more than one assessor, were they similar in ability/experience?**

Were those involved in collecting data trained or educated in the use of the instrument/s? If there was more than one data collector, were they similar in terms of level of education, and clinical or research experience. Overall, was the condition measured in the same way for all participants?

- 2 = The paper states that the assessor or assessors were trained. If the assessors were stated to be psychologists, neuropsychologists or psychometrists it was assumed they were adequately trained.
- 1 = Researchers mention that the tests were administered by assessors/investigators but do not mention their experience or training
- 0 = No clear statement of who conducted the assessments

#### **4. Were appropriate procedures in place to minimize attrition?**

Appropriate measures for minimizing attrition are systematic contact strategies (e.g., contacting participants three times; by letter, phone and email). A procedure would be considered inappropriate if it was not systematic (e.g., letting participants contact them, and therefore relying on their motivation).

If there was only one follow-up time that was <10 days and a strategy for minimizing attrition was not mentioned, the study was still assigned 2 points as the strategy was assumed not to be necessary (i.e., the patients were still in hospital). Also, studies that reported only delirium data were assigned 2 points using this same rationale, as the patients are assumed to still be in hospital during the delirium assessments.

- 2 = Studies that utilized a systematic contact strategy that was explicit and would be thought to lead to greater retention at follow-up, or N/A.
- 1 = Procedure mentioned (e.g., called participants) but not clear if the contact process was thorough
- 0 = No strategy mentioned

#### **5. Was the follow up time reported?**

The time points for follow-up assessments should be clearly stated. Studies with multiple follow-up assessments were assigned 2 points for this item if all follow-up time points were clearly and precisely stated, 1 point if some of the time-points were clearly and precisely stated, or all time-points were stated, but inexactly (e.g., “6 weeks”).

- 2 = When the participant were likely to be out of hospital at time of assessment, studies that reported a mean and SD of the number of days/months for all follow-ups were assigned 2 points. If the follow-up time was likely to be when the patient was in hospital (e.g., 3 days) it was assumed that this was a precise value and the study was awarded 2 points.
- 1 = Studies that report a vague/inexact follow-up time (e.g., 6 months), which is likely to have varied between participants, for some or all follow-ups
- 0 = Follow-up time not reported

#### **6. Was follow up complete, and if not, were the reasons to loss to follow up described?**

Reporting of efforts to follow up participants that dropped out may be regarded as an indicator of a well conducted study. Therefore, this item is scored depending on whether a clear and justifiable description of why people were left out, excluded, dropped out, etc. was provided.

- 2 = Follow-up was complete, or if not, there was a statement of how many participants dropped out and for what reasons
- 1 = There is an unclear statement outlining reasons for drop-out and how many participants for each reason (i.e., reasons for drop-out are given but not how many participants for each reason)
- 0 = There was drop out but no mention of reasons why

**Table S1. Pooled estimates and corresponding effect size (OR, MD, SMD) for pre, intra, and post-operative variables for delirium (1-7 days) post-CABG.**

| Variable                           | Pooled Estimate |                                          |           |         | Heterogeneity  |                  | Common effect size |
|------------------------------------|-----------------|------------------------------------------|-----------|---------|----------------|------------------|--------------------|
|                                    | k (n)           | OR/MD <sup>†</sup> /<br>SMD <sup>‡</sup> | 95%CI     | p value | I <sup>2</sup> | Tau <sup>2</sup> | SMD                |
| <b>Pre-Operative (Categorical)</b> |                 |                                          |           |         |                |                  |                    |
| Alcoholism                         | 6 (994)         | 0.90                                     | 0.50—1.62 | .721    | 13.45          | 0.08             | 0.06               |
| Arrhythmia, incl. AF               | 15 (31746)      | 2.07                                     | 1.70—2.51 | <.001   | 25.35          | 0.03             | 0.40               |
| BMI >28 (including >30)            | 7 (16297)       | 1.16                                     | 0.74—1.80 | .516    | 56.28          | 0.17             | 0.08               |
| BMI ≥30 only                       | 5 (1786)        | 1.57                                     | 1.05—2.37 | .030    | 0              | 0                | 0.25               |
| Cognitive impairment               | 7 (1039)        | 4.17                                     | 2.75—6.33 | <.001   | 0              | 0                | 0.79               |
| Depression                         | 4 (580)         | 2.49                                     | 1.29—4.81 | .006    | 29.16          | 0.13             | 0.50               |
| Diabetes                           | 30 (48465)      | 1.49                                     | 1.39—1.60 | <.001   | 0              | 0                | 0.22               |
| Dyslipidemia/Hyperlipidemia        | 13 (6449)       | 0.89                                     | 0.63—1.25 | .502    | 51.79          | 0.18             | 0.06               |
| Education>12years/high school      | 4 (567)         | 0.66                                     | 0.41—1.06 | .088    | 0              | 0                | 0.23               |
| Hypertension                       | 27 (38362)      | 1.44                                     | 1.21—1.70 | <.001   | 52.54          | 0.07             | 0.20               |
| Sex (male)                         | 35 (37851)      | 0.90                                     | 0.75—1.08 | .263    | 53.35          | 0.10             | 0.06               |
| Kidney injury                      | 14 (25264)      | 1.94                                     | 1.50—2.52 | <.001   | 27.49          | 0.05             | 0.37               |
| Previous MI <30 days               | 5 (926)         | 1.54                                     | 0.90—2.65 | .116    | 37.82          | 0.14             | 0.24               |
| Previous MI history/ever           | 11 (10662)      | 1.17                                     | 0.98—1.39 | .075    | 0              | 0                | 0.09               |
| Previous stroke, TIA, CVA          | 15 (27127)      | 2.55                                     | 1.94—3.35 | <.001   | 44.42          | 0.10             | 0.52               |
| PVD                                | 14 (16340)      | 1.98                                     | 1.48—2.64 | <.001   | 38.76          | 0.09             | 0.38               |
| Smoking current                    | 14 (17825)      | 1.19                                     | 0.84—1.69 | .321    | 72.37          | 0.24             | 0.10               |
| Smoking current/history            | 21 (25813)      | 1.15                                     | 0.94—1.42 | .174    | 56.81          | 0.09             | 0.08               |
| <b>Pre-Operative (Continuous)</b>  |                 |                                          |           |         |                |                  |                    |
| Age (years) *                      | 28 (9303)       | 4.14 <sup>†</sup>                        | 2.95—5.34 | <.001   | 78.61          | 7.14             | 0.49               |

|                                     |            |        |              |       |       |        |      |
|-------------------------------------|------------|--------|--------------|-------|-------|--------|------|
| BMI                                 | 5 (2143)   | 0.03†  | -0.46—0.51   | .915  | 0     | 0      | 0.01 |
| Cognition: All tests                | 9 (887)    | -0.58‡ | -0.78— -0.37 | <.001 | 34.11 | 0.03   | 0.58 |
| Cognition: MMSE only                | 7 (621)    | -1.14† | -1.91— -0.36 | .004  | 77.72 | 0.68   | 0.52 |
| Depression GDS                      | 2 (233)    | 0.75†  | -0.15—1.65   | .101  | 0     | 0      | 0.30 |
| Education (years)                   | 6 (665)    | -0.93† | -1.65— -0.20 | .012  | 19.31 | 0.16   | 0.25 |
| EuroSCORE *                         | 10 (11199) | 1.35†  | 0.58—2.12    | .001  | 96.10 | 1.38   | 0.51 |
| LVEF (%)                            | 11 (3308)  | 1.25†  | -0.69—3.19   | .208  | 79.34 | 7.97   | 0.13 |
| <b>Intra-Operative (Continuous)</b> |            |        |              |       |       |        |      |
| ACC time (mins)                     | 16 (7488)  | 5.97†  | 0.62— 11.32  | .029  | 90.65 | 101.19 | 0.29 |
| CPB time (mins)                     | 21 (12412) | 7.41†  | 4.03—10.78   | <.001 | 51.93 | 25.72  | 0.25 |
| Duration of surgery (mins)          | 13 (3218)  | 20.53† | 8.67—32.38   | .001  | 75.96 | 325.89 | 0.35 |
| Intubation time (hours)             | 11 (6693)  | 6.82†  | 2.44—11.20   | .002  | 98.40 | 52.26  | 0.75 |
| Number of grafts                    | 8 (2731)   | 0.11†  | -0.02—0.24   | .084  | 34.30 | 0.01   | 0.13 |
| <b>Post-Operative (Categorical)</b> |            |        |              |       |       |        |      |
| Arrhythmia, incl. AF                | 16 (8809)  | 3.53   | 2.41—5.16    | <.001 | 71.51 | 0.37   | 0.70 |
| <b>Post-Operative (Continuous)</b>  |            |        |              |       |       |        |      |
| LOS in ICU (days)                   | 14 (7177)  | 2.22†  | 1.32—3.13    | <.001 | 97.84 | 2.69   | 1.20 |

Note: \* indicates potential small-study effect or publication bias, see (**Figure S2**) and for forest plots (**Figure S1**). Symbols following pooled estimates denote different effect sizes: indicating OR (no symbol), MD† and SMD‡. ACC= aortic cross-clamp, AF= atrial fibrillation, BMI= body mass index, CPB= cardiopulmonary bypass, CVA= cerebrovascular attack, GDS= geriatric depression scale, ICU= intensive care unit, k= number of estimates (number of studies), LOS= length of stay, LVEF= left ventricular ejection fraction, , MD= mean difference, MI= myocardial infarction, MMSE= mini mental state examination, n= pooled sample size, OR= odds ratio, PVD= peripheral vascular disease, SMD= standardized mean difference and TIA= transient ischemic attack..

**Table S2. Pooled estimates and corresponding effect size (OR, MD, SMD) for pre, intra, and post-operative variables for acute cognitive decline (immediately up to 1-month) post-CABG.**

| Variable                           | k (n)     | Pooled Estimate                          |              |         | Heterogeneity  |                  | Effect size |
|------------------------------------|-----------|------------------------------------------|--------------|---------|----------------|------------------|-------------|
|                                    |           | OR/MD <sup>†</sup> /<br>SMD <sup>‡</sup> | 95%CI        | p value | I <sup>2</sup> | Tau <sup>2</sup> | SMD         |
| <b>Pre-Operative (Categorical)</b> |           |                                          |              |         |                |                  |             |
| Arrhythmia, incl. AF               | 7 (945)   | 1.24                                     | 0.76—2.04    | .389    | 0              | 0                | 0.12        |
| Cognitive impairment               | 4 (714)   | 1.11                                     | 0.71—1.73    | .653    | 0              | 0                | 0.06        |
| Depression                         | 2 (330)   | 3.42                                     | 1.12—10.46   | .031    | 61.53          | 0.40             | 0.68        |
| Diabetes                           | 17 (3008) | 1.44                                     | 1.21—1.72    | <.001   | 4.18           | 0.01             | 0.20        |
| Dyslipidemia/Hyperlipidemia        | 6 (836)   | 1.16                                     | 0.74—1.84    | .512    | 35.86          | 0.11             | 0.08        |
| Hypertension                       | 15 (2012) | 1.91                                     | 1.45—2.53    | <.001   | 34.10          | 0.09             | 0.36        |
| Sex (male)                         | 18 (2299) | 1.03                                     | 0.82—1.29    | .824    | 0              | 0                | 0.01        |
| Kidney injury                      | 4 (749)   | 1.21                                     | 0.40—3.72    | .735    | 54.22          | 0.67             | 0.11        |
| Previous MI <90 days               | 3 (418)   | 1.12                                     | 0.59—2.16    | .724    | 0              | 0                | 0.07        |
| Previous MI history/ever           | 7 (1011)  | 1.16                                     | 0.83—1.63    | .394    | 25.17          | 0.05             | 0.08        |
| Previous stroke, TIA, CVA          | 5 (745)   | 2.44                                     | 1.47—4.04    | .001    | 0              | 0                | 0.49        |
| PVD                                | 4 (856)   | 1.09                                     | 0.42—2.83    | .865    | 57.17          | 0.50             | 0.05        |
| Smoking current/history            | 9 (1400)  | 1.03                                     | 0.64—1.66    | .892    | 68.09          | 0.31             | 0.02        |
| <b>Pre-Operative (Continuous)</b>  |           |                                          |              |         |                |                  |             |
| Age (years) *                      | 22 (2761) | 2.69 <sup>†</sup>                        | 1.20—4.18    | <.001   | 92.85          | 9.17             | 0.53        |
| BMI                                | 5 (906)   | -0.20 <sup>†</sup>                       | -0.25— -0.14 | <.001   | 0              | 0                | 0.10        |
| Cognition: All tests               | 3 (151)   | 0.23 <sup>‡</sup>                        | -0.43—0.88   | .492    | 69.56          | 0.23             | 0.23        |
| Cognition: MMSE only               | 2 (116)   | 0.28 <sup>†</sup>                        | -1.39—1.96   | .740    | 82.66          | 1.21             | 0.24        |
| Depression: All tests              | 4 (448)   | 0.50 <sup>‡</sup>                        | -0.48—1.48   | .316    | 93.32          | 0.92             | 0.50        |

|                                     |           |        |            |       |       |       |      |
|-------------------------------------|-----------|--------|------------|-------|-------|-------|------|
| Education (years)                   | 6 (534)   | -0.44† | -1.40—0.53 | .377  | 49.52 | 0.65  | 0.11 |
| EuroSCORE                           | 4 (582)   | 0.74†  | 0.48—1.01  | <.001 | 0     | 0     | 0.46 |
| LVEF %                              | 9 (1126)  | -1.97† | -4.21—0.28 | .086  | 72.49 | 8.28  | 0.21 |
| <b>Intra-Operative (Continuous)</b> |           |        |            |       |       |       |      |
| ACC time (mins)                     | 7 (867)   | -1.34† | -5.91—3.23 | .566  | 61.81 | 20.52 | 0.07 |
| CPB time (mins)                     | 13 (1699) | 3.39†  | -0.10—6.88 | .057  | 59.34 | 16.87 | 0.15 |
| Duration of surgery (mins)          | 6 (723)   | 13.52† | 3.67—23.38 | .007  | 21.27 | 32.28 | 0.26 |
| Intubation time (hours)             | 6 (1193)  | 1.95†  | 1.37—2.52  | <.001 | 28.29 | 0.15  | 0.82 |
| Number of grafts                    | 7 (1113)  | 0.03†  | -0.03—0.09 | .400  | 7.50  | 0     | 0.10 |
| Total microemboli                   | 4 (771)   | 0.16‡  | -0.07—0.38 | .167  | 45.77 | 0.02  | 0.16 |
| <b>Post-Operative (Categorical)</b> |           |        |            |       |       |       |      |
| Arrhythmia, incl. AF                | 6 (1045)  | 1.40   | 1.01—1.94  | .042  | 0     | 0     | 0.19 |
| Delirium                            | 3 (355)   | 6.15   | 2.32—16.27 | <.001 | 6.32  | 0.07  | 1.00 |
| Without outlier                     | 2 (308)   | 4.85   | 1.89—12.45 | .001  | 0     | 0     | 0.87 |
| <b>Post-Operative (Continuous)</b>  |           |        |            |       |       |       |      |
| LOS in ICU (days)                   | 7 (1055)  | 0.29†  | 0.04—0.55  | .025  | 77.82 | 0.08  | 0.77 |

Note: \* indicates potential small-study effect or publication bias, see (**Figure S4**) and for forest plots (**Figure S3**). Symbols following pooled estimates denote different effect sizes: indicating OR (no symbol), MD† and SMD‡. ACC= aortic cross-clamp, AF= atrial fibrillation, BMI= body mass index, CPB= cardiopulmonary bypass, CVA= cerebrovascular attack, ICU= intensive care unit, k= number of estimates (number of studies), LOS= length of stay, LVEF= left ventricular ejection fraction, , MD= mean difference, MI= myocardial infarction, n= pooled sample size, OR= odds ratio, PVD= peripheral vascular disease, SMD= standardized mean difference and TIA= transient ischemic attack



**Table S3. Pooled estimates and corresponding effect size (OR, MD, SMD) for pre, intra, and post-operative variables for cognitive decline in the mid-term (1 to 6-months) post-CABG.**

| Variable                            | k (n)     | Pooled Estimate |            |         | Heterogeneity  |                  | Effect size |
|-------------------------------------|-----------|-----------------|------------|---------|----------------|------------------|-------------|
|                                     |           | OR/MD†/<br>SMD‡ | 95%CI      | p value | I <sup>2</sup> | Tau <sup>2</sup> | SMD         |
| <b>Pre-Operative (Categorical)</b>  |           |                 |            |         |                |                  |             |
| Depression                          | 2 (471)   | 2.50            | 1.28—4.88  | .007    | 0              | 0                | 0.51        |
| Diabetes                            | 10 (2046) | 1.54            | 0.98—2.40  | .059    | 61.33          | 0.28             | 0.24        |
| Sex (male)                          | 12 (2599) | 1.01            | 0.82—1.23  | .965    | 0              | 0                | 0.00        |
| Hypertension                        | 12 (2350) | 0.89            | 0.59—1.32  | .558    | 69.32          | 0.31             | 0.07        |
| Previous MI history/ever            | 3 (975)   | 0.88            | 0.57—1.37  | .580    | 41.32          | 0.06             | 0.07        |
| Previous stroke, TIA, CVA           | 2 (761)   | 0.83            | 0.26—2.63  | .748    | 0              | 0                | 0.11        |
| PVD                                 | 2 (761)   | 0.71            | 0.41—1.21  | .209    | 0              | 0                | 0.19        |
| Smoking (current)                   | 5 (1006)  | 1.00            | 0.73—1.37  | .983    | 0              | 0                | 0.00        |
| <b>Pre-Operative (Continuous)</b>   |           |                 |            |         |                |                  |             |
| Age (years)                         | 12 (2093) | 1.09†           | -0.06—2.25 | .063    | 29.21          | 1.12             | 0.13        |
| Cognition: All tests                | 3 (855)   | 0.30‡           | 0.01—0.59  | .041    | 68.84          | 0.04             | 0.30        |
| Cognition: CI only                  | 2 (795)   | 0.50†           | -0.17—1.17 | .146    | 89.28          | 0.21             | 0.43        |
| Depression: All tests               | 3 (429)   | 0.86‡           | -0.68—2.39 | .273    | 96.08          | 1.75             | 0.86        |
| Education (years)                   | 5 (950)   | 0.13†           | -0.57—0.83 | .715    | 44.26          | 0.24             | 0.05        |
| LVEF %                              | 7 (1266)  | 0.61†           | -0.63—1.86 | .336    | 0              | 0                | 0.06        |
| <b>Intra-Operative (Continuous)</b> |           |                 |            |         |                |                  |             |
| ACC time (mins)                     | 4 (890)   | -1.29†          | -4.35—1.76 | .407    | 0              | 0                | 0.06        |
| CPB time (mins)                     | 7 (1266)  | 2.15†           | -2.44—6.74 | .359    | 28.63          | 10.41            | 0.06        |
| Number of grafts                    | 4 (1124)  | -0.06†          | -0.17—0.06 | .358    | 0              | 0                | 0.06        |

|                                    |         |        |            |      |       |      |      |
|------------------------------------|---------|--------|------------|------|-------|------|------|
| Total microemboli                  | 4 (542) | -0.46‡ | -0.97—0.05 | .076 | 51.03 | 0.12 | 0.46 |
| <b>Post-Operative (Continuous)</b> |         |        |            |      |       |      |      |
| LOS in ICU (days)                  | 2 (100) | 0.23†  | -1.10—1.55 | .736 | 88.27 | 0.80 | 0.33 |

Note: \* indicates potential small-study effect or publication bias, see (**Figure S6**) and for forest plots (**Figure S5**). Symbols following pooled estimates denote different effect sizes: indicating OR (no symbol), MD† and SMD‡. ACC= aortic cross-clamp, CI= cognitive index score, CPB= cardiopulmonary bypass, CVA= cerebrovascular attack, ICU= intensive care unit, k= number of estimates (number of studies), LOS= length of stay, LVEF= left ventricular ejection fraction, , MD= mean difference, MI= myocardial infarction, n= pooled sample size, OR= odds ratio, PVD= peripheral vascular disease, SMD= standardized mean difference and TIA= transient ischemic attack.

**Table S4. Pooled estimates and corresponding effect size (OR, MD, SMD) for pre, intra, and post-operative variables for cognitive decline in the long-term (12 to 15-months) post-CABG.**

| Variable                            | k (n)   | Pooled Estimate |            |         | Heterogeneity  |                  | Effect size |
|-------------------------------------|---------|-----------------|------------|---------|----------------|------------------|-------------|
|                                     |         | OR/MD†/<br>SMD‡ | 95%CI      | p value | I <sup>2</sup> | Tau <sup>2</sup> | SMD         |
| <b>Pre-Operative (Categorical)</b>  |         |                 |            |         |                |                  |             |
| Cognitive impairment                | 2 (343) | 1.02            | 0.57—1.80  | .952    | 0              | 0                | 0.01        |
| Diabetes                            | 2 (504) | 1.44            | 0.78—2.64  | .245    | 0              | 0                | 0.20        |
| Sex (male)                          | 2 (301) | 1.17            | 0.28—4.91  | .830    | 28.63          | 0.49             | 0.09        |
| Hypertension                        | 2 (504) | 1.30            | 0.84—2.00  | .241    | 0              | 0                | 0.14        |
| <b>Pre-Operative (Continuous)</b>   |         |                 |            |         |                |                  |             |
| Age (years)                         | 2 (301) | 1.57†           | -2.94—6.09 | .495    | 46.03          | 5.30             | 0.17        |
| <b>Intra-Operative (Continuous)</b> |         |                 |            |         |                |                  |             |
| Number of grafts                    | 2 (301) | 0.03†           | -0.27—0.33 | .832    | 0              | 0                | 0.04        |

Note: \* indicates potential small-study effect or publication bias. See **(Figure S7)** for forest plots. Symbols following pooled estimates denote different effect sizes: indicating OR (no symbol), MD† and SMD‡. k= number of estimates (number of studies), MD= mean difference, n= pooled sample size, OR= odds ratio, SMD= standardized mean difference.

**Table S5. Excluded references from full-text screening with associated reason.**

| Reference                                                                                                                                                                                                                                                                                                                                             | Exclusion Reason |
|-------------------------------------------------------------------------------------------------------------------------------------------------------------------------------------------------------------------------------------------------------------------------------------------------------------------------------------------------------|------------------|
| Abner EL, Ding X, Caban-Holt AM, Schmitt FA, Kryscio RJ. Comorbid subjective cognitive decline and sleep apnea significantly increase the risk of incident dementia: Results from the prevention of alzheimer's disease with vitamin e and selenium study. <i>Alzheimer's and Dementia</i> . 2015;11:P733                                             | abstract only    |
| Aghadavoudi Jolfaei O, Bagheri K, Motamedi O, Akbari M. The effect of mean arterial pressure during cardiopulmonary bypass on clinical and para clinical parameters during and after coronary artery bypass graft surgery. <i>European Journal of Anaesthesiology</i> . 2012;29:69-70                                                                 | abstract only    |
| Al Tmimi L, Sergeant P, Velde M, Meyns B, Coburn M, Rex S. Xenon anaesthesia in patients undergoing off-pump coronary artery bypass graft surgery: A prospective, randomized controlled clinical trial (eudract 2012-002316-12). <i>European Journal of Anaesthesiology</i> . 2014;31:71                                                              | abstract only    |
| Alexander W. American college of cardiology meeting highlights. P and T. 2017;42:340-343                                                                                                                                                                                                                                                              | abstract only    |
| Andrejaitiene J, Sirvinskas E, Svagzdiene M. Post-cardiac surgery delirium risk factors and clinical outcome. <i>Applied Cardiopulmonary Pathophysiology</i> . 2012;16:251-252                                                                                                                                                                        | abstract only    |
| Annett Salzwedel A, Heidler MD, Wegscheider K, Schikora M, Jobges M, Zaskia P, Voller H. Cognitive performance in cardiac rehabilitation: Impact on short- and medium-term outcome of patient education. <i>European Journal of Preventive Cardiology</i> . 2017;24 (1 Supplement 1):S10                                                              | abstract only    |
| Anonymous. Alzheimer's gene linked with postoperative confusion. <i>Journal of psychosocial nursing and mental health services</i> . 1998;36:13-14                                                                                                                                                                                                    | abstract only    |
| Antonitsis P, Anastasiadis K, Argiriadou H, Kosmidis MH, Megari K, Thomaidou E, Aretouli E, Papakonstantinou C. Improved neurocognitive outcome after coronary artery bypass surgery using minimal versus conventional extracorporeal circulation: A randomized controlled study. <i>Journal of the American College of Cardiology</i> . 2011;57:E910 | abstract only    |
| Arenson B, Grocott H, MacDonald L, Hiebert BM, Carino M, Freed DH, Arora RC. The effectiveness of implementing a systematic screening tool to improve identification of delirium after cardiac surgery. <i>Canadian Journal of Cardiology</i> . 2012;28:S288                                                                                          | abstract only    |
| Arsenova N, Mosenko S. Neurological complications at the coronary artery bypass grafting. <i>European journal of neurology</i> . 2010;17:169                                                                                                                                                                                                          | abstract only    |
| Arthur B, Tan S, Alston P. Is postoperative delirium associated with the use of cardio-pulmonary bypass? A comparison of patients undergoing on- and off-pump coronary artery bypass grafting surgery. <i>Journal of cardiothoracic and vascular anesthesia</i> . 2011;25:S63-S64                                                                     | abstract only    |
| Arunagirinathan U, Gruning A, Gulbins H, Reichenspurner H. Cognitive outcomes and quality of life after on-pump versus off-pump coronary artery bypass grafting. <i>Thoracic and Cardiovascular Surgeon</i> . 2011;59:no pagination                                                                                                                   | abstract only    |
| Awe M, Dalyanoglu H, Schipke JD, Lichtenberg A, Korbmacher B. Postoperative delirium: Examination of 1n206 cardio-surgical patients of a single university center during one-year period. <i>Thoracic and Cardiovascular Surgeon</i> . Conference: 46th Annual Meeting of the German Society for Thoracic and Cardiovascular Surgery, DGTHG. 2017;65  | abstract only    |
| Baroncelli F, Barile L, D'Agrosa L, Jain A, Lombrano MR, Marini E, Forfori F, Martinelli G, Meraglia A. Adherence to the local guidelines for the management of delirium in a cardiothoracic intensive care unit: A clinical audit. <i>Applied Cardiopulmonary Pathophysiology</i> . 2014;18:102                                                      | abstract only    |
| Bendov DV, Gordeev ML. Simultaneous carotid endarterectomy and coronary artery bypass grafting. <i>Interactive cardiovascular and thoracic surgery</i> . 2011;12:S77-S78                                                                                                                                                                              | abstract only    |
| Brown CH. The effect of remote ischemic preconditioning on delirium after cardiac surgery. <i>Anesthesia and analgesia</i> . 2016;122:S64                                                                                                                                                                                                             | abstract only    |
| Caldas J, Panerai R, Camara L, Ferreira G, Bor-Seng-Shu E, Lima M, Galas F, Mian N, Nogueira R, Queiroz De Oliveira G, et al. Dynamic cerebral autoregulation: A marker of post-operative delirium? <i>Critical Care</i> . Conference: 37th International Symposium on Intensive Care and Emergency Medicine. Belgium. 2017;21                        | abstract only    |

|                                                                                                                                                                                                                                                                                                                                                                                           |               |
|-------------------------------------------------------------------------------------------------------------------------------------------------------------------------------------------------------------------------------------------------------------------------------------------------------------------------------------------------------------------------------------------|---------------|
| Caldas J, Panerai R, Ferreira G, Camara L, Zeferino S, Jardim J, Bor-Seng-Shu E, Oliveira M, Norgueira R, Groehs R, et al. Cerebral hemodynamic in high-risk cardiac patients undergoing cardiac surgery with cardiopulmonary bypass: The role of intraaortic balloon. Critical Care. Conference: 37th International Symposium on Intensive Care and Emergency Medicine. Belgium. 2017;21 | abstract only |
| Chugunova J, Chumakova G, Gritzenko O, Veselovskaya N. Neuropsychological dysfunctions among patients with artery bypass grafting. Atherosclerosis. 2015;241:e212                                                                                                                                                                                                                         | abstract only |
| Ding S, Feng X, Tao X, Lu S, Su P, Shen Y, Zhao H, Wu Y. Including intra-and post-operative factors in delirium predictive rule after coronary artery bypass graft could increase its accuracy. Circulation. 2015;132:no pagination                                                                                                                                                       | abstract only |
| Dorynska A, Kozela M, Pajak A. Verbal memory and verbal fluency as predictors of cardiovascular disease incidence in polish cohort of the hapiee study. European Journal of Preventive Cardiology. 2018;25 (2 Supplement 1):S31-S32                                                                                                                                                       | abstract only |
| Duara R, Barker WW, Potter E, Appel J, Bhatia N, Greig M, Wu Y, Schofield E, Loewenstein D. Long-term effect of history of coronary artery bypass grafting surgery (cabg) on cognitive diagnosis, mri findings and episodic memory scores. Alzheimer's and Dementia. 2009;5:387-388                                                                                                       | abstract only |
| Dzemali O, Graves K, Loeblein H, Zientara A, Kostorz A, Haussler A, Genoni M. Risk factors and incidence for postop delirium in patients undergoing cardiac surgery with cardiopulmonary bypass support vs. Off pump surgery. Thoracic and Cardiovascular Surgeon. 2013;61:no pagination                                                                                                  | abstract only |
| Ellouze M, Badrudin D, Cartier R. Statins decrease incidence of delirium after opcab surgery. Canadian Journal of Cardiology. 2015;31:S173                                                                                                                                                                                                                                                | abstract only |
| Eshankulova N, Mirataliyevna N. Aortic atherosclerosis and postoperative neurological dysfunction in elderly coronary surgical patients. Cerebrovascular Diseases. 2017;43 (Supplement 1):41                                                                                                                                                                                              | abstract only |
| Evered L, Scott D, Silbert B, Ames D. A prospective evaluation of dementia following coronary artery bypass graft surgery. European Journal of Anaesthesiology. 2014;31:121                                                                                                                                                                                                               | abstract only |
| Evered L, Silbert B, Ames D, Maruff P, Scott D. Does general anaesthesia exacerbate alzheimer's disease? Alzheimer's and Dementia. 2012;8:P208-P209                                                                                                                                                                                                                                       | abstract only |
| Evered L, Silbert B, Scott D, Maruff P, Li QX, Masters CL. Plasma abeta42 levels predict cognitive dysfunction after cardiac surgery. Anaesthesia and intensive care. 2009;37:655                                                                                                                                                                                                         | abstract only |
| Evered L, Silbert B, Scott D, Maruff P. Cardiac surgery accelerates decline in clinical dementia rating scale. Alzheimer's and Dementia. 2011;7:S243                                                                                                                                                                                                                                      | abstract only |
| Feola M, Menditto E, Nervo E, Lombardo E, Taglieri C, Piccolo S, Peano M, Vallauri P. Efficacy of the cardiovascular rehabilitation in patients with congestive heart failure or after cardiac surgery. European Journal of Heart Failure, Supplement. 2010;9:S270                                                                                                                        | abstract only |
| Feola M, Vallauri P, Taglieri C, Lombardo E, Nasi M, Aspromonte N, Valle R. Is there a correlation between cognitive impairment and prognostic parameters in patients with congestive heart failure or after cardiac surgery? European Journal of Heart Failure, Supplement. 2009;8:ii604                                                                                                 | abstract only |
| Freibrod J, Huppe M, Sedemund-Adib B, Sievers HH, Schmidtke C. Can we predict the occurrence of postoperative delirium after cardiac surgery in the elderly by a clinical and frailty assessment? Thoracic and Cardiovascular Surgeon. 2013;61:no pagination                                                                                                                              | abstract only |
| Freibrod J, Huppe M, Sedemund-Adib B, Sievers HH, Schmidtke C. Effect of postoperative delirium on quality of life and daily activities 6 month after elective cardiac surgery in the elderly. Thoracic and Cardiovascular Surgeon. 2013;61:no pagination                                                                                                                                 | abstract only |
| Galina Chumakova G, Chugunova J, Veselovskaya N. Dynamics of cognitive functions in patient with visceral obesity undergoing coronary artery bypass grafting. European Journal of Preventive Cardiology. 2016;23:S56                                                                                                                                                                      | abstract only |
| Gasparovic H, Kopjar T, Anticevic A, Rados M, Malojcic B, Ivancan V, Fabijanic T, Cikes M, Milicic D, Gasparovic V, et al. Remote ischemic preconditioning preceding coronary artery bypass grafting reduces the volume of ischemic brain lesions. Circulation. Conference: Resuscitation Science Symposium, ReSS. 2017;136                                                               | abstract only |

|                                                                                                                                                                                                                                                                                                                                                              |               |
|--------------------------------------------------------------------------------------------------------------------------------------------------------------------------------------------------------------------------------------------------------------------------------------------------------------------------------------------------------------|---------------|
| Gauge N, Salaunkey K, Zhu J, Ferreira N, Aron J, Araujo H, Green D, Amoako D, Ballard C, Kunst G. Optimization of intra-operative depth of anaesthesia and cerebral oxygenation significantly reduces postoperative delirium after coronary artery bypass graft surgery. <i>Applied Cardiopulmonary Pathophysiology</i> . 2014;18:68                         | abstract only |
| Girgin S, Aksun M, Karahan N, Golboyu B, Sencan A, Yurekli I, Gunes T, Aran G, Gurbuz A. Effects of intraoperative monitoring of cerebral oximetry on postoperative neurocognitive functions of patients after cabg surgery. <i>Cochrane Central Register of Controlled Trials (CENTRAL)</i> . 2012;16:268-269                                               | abstract only |
| Giubbolini G, Nitti M, Di Volo S, Costoloni G, Durante F, Casolaro I, Morbidelli G, Zanobini F, Biagioli B, Fagiolini A. Psychiatric disorders in intensive care unit post cardio-surgery. <i>European Neuropsychopharmacology</i> . 2014;24:S357-S358                                                                                                       | abstract only |
| Gottesman RF, Grega MA, Bailey MM, Pham LD, Zeger SL, Baumgartner WA, Selnes OA, McKhann GM. Delirium after cabg surgery is associated with higher long-term mortality. <i>Stroke</i> . 2009;40:e261                                                                                                                                                         | abstract only |
| Gottesman RF, Grega MA, James N, Baumgartner WA, Selnes OA, McKhann GM. Impact of cognition on mortality in individuals with coronary artery disease. <i>Annals of neurology</i> . 2010;68:S12                                                                                                                                                               | abstract only |
| Gottesman RF, Grega MA, Selnes OA, Thompson RE, Zhou X, James N, Baumgartner WA, McKhann GM. Stroke risk predicts cognitive performance over 6 years in patients with coronary artery disease. <i>Stroke</i> . 2011;42:e55                                                                                                                                   | abstract only |
| Graham AA. The association between baseline frailty and delirium or functional status after cardiac surgery. <i>Journal of the American Geriatrics Society</i> . 2016;64:S142-S143                                                                                                                                                                           | abstract only |
| Herrmann N, O'Regan J, Schwartz YB, Saleem M, Swardfager W, Lanctot K. Cognitive effects of anticholinergic medications in patients with coronary artery disease. <i>American Journal of Geriatric Psychiatry</i> . 2013;21:S159                                                                                                                             | abstract only |
| Holmgaard F, Vedel AG, Rasmussen LS, Langkilde A, Nilsson JC, Ravn HB. Near infrared spectroscopy at two levels of mean arterial pressure during cardiopulmonary bypass. <i>Journal of Cardiothoracic and Vascular Anesthesia</i> . 2017;31 (Supplement 1):S3                                                                                                | abstract only |
| Hosang S, Bartels C, Hansen M, Herr M, Schilling T, Baraki H, Kutschka I, Hadem J. Short-term cognitive function following coronary artery bypass grafting in patients at high risk of cerebrovascular events - preliminary results from a prospective study. <i>Internist</i> . 2017;58 (Supplement 1):S36                                                  | abstract only |
| Hsieh SJ, Fuster D, D'Alessandro DA, Leff JD, Gong MN. Feasibility and efficacy of intranasal insulin for post-operative delirium: The cns-elders randomized controlled trial. <i>American Journal of Respiratory and Critical Care Medicine</i> . 2015;191:no pagination                                                                                    | abstract only |
| Ishida K, Yamashita A, Furutani A, Oshibuchi R, Yamagata H, Sakamoto S, Fukuda S, Matsumoto M. Association between change in intraoperative regional cerebral oxygen saturation and development of postoperative cognitive dysfunction after off-pump coronary artery bypass graft surgery. <i>Journal of neurosurgical anesthesiology</i> . 2012;24:450-451 | abstract only |
| Ishida K, Yamashita A, Uchida M, Nakanishi T, Yamashita S, Utada K, Iida Y, Kaneko S, Shiramoto K, Matsumoto M. Evaluation of factors associated with development of postoperative cognitive dysfunction after off-pump coronary artery bypass graft surgery. <i>Journal of neurosurgical anesthesiology</i> . 2015;27:456-457                               | abstract only |
| Johansson E, Wohlin S, Andersson EA, Thulesius H. Cognitive function and postoperative delirium in 64 elective cardiac surgery patients. <i>Scandinavian Cardiovascular Journal</i> . 2012;46:42                                                                                                                                                             | abstract only |
| Kacar MB, Kacar SM, Doric VV, Majdevac SM, Zagoricnik MR, Cemerlic-Adic NL. Postoperative cognitive dysfunction after cardiopulmonary bypass demonstrated by psychometric testing - is it really common complication? <i>European Journal of Anaesthesiology</i> . 2011;28:8                                                                                 | abstract only |
| Kadoi Y. Effects of balloon-induced pulsatile perfusion on postoperative short- and long-term cognitive dysfunction in diabetic patients with impaired cerebrovascular carbon dioxide reactivity. <i>Critical care medicine</i> . 2011;39:58                                                                                                                 | abstract only |
| Kastaun S, Gerriets T, Schwarz N, Tschernatsch M, Kaps M, Kraus J, Schoenburg M, Walther T. Charles bonnet syndrome-like pseudo-hallucinations following heart surgery in patients with normal vision. <i>Journal of Neurology</i> . 2011;258:S46                                                                                                            | abstract only |

|                                                                                                                                                                                                                                                                                                                                 |               |
|---------------------------------------------------------------------------------------------------------------------------------------------------------------------------------------------------------------------------------------------------------------------------------------------------------------------------------|---------------|
| Kastaun S, Schwarz N, Schonburg M, Mollmann H, Bachmann G, Sammer G, Hamm C, Walther T, Gerriets T. Post-interventional cognitive dysfunction and ischemic brain lesions after cardiac catheter procedures and cabg. <i>Thoracic and Cardiovascular Surgeon</i> . 2012;60:no pagination                                         | abstract only |
| Kazmierski J, Banys A, Latek J, Bourke J, Jaszewski R, Kloszewska I, Barbosa A, Cosci F. Raised il-2 and tnf-alpha concentrations are independently associated with delirium after coronary artery bypass graft surgery. <i>Psychotherapy and psychosomatics</i> . 2013;82:47                                                   | abstract only |
| Kazmierski J, Banys A, Latek J, Bourke J, Jaszewski R, Kloszewska I. Cortisol levels and neuropsychiatric diagnosis as markers of postoperative delirium. <i>European Psychiatry</i> . 2013;28:no pagination                                                                                                                    | abstract only |
| Keunen RW, Palmbergen WA, Van Sonderen A, Falsafi MA, Duynstee F, Claessen K. Consistent reduction of post coronary artery bypass grafting delirium frequency by the haga braincare strategy. <i>Cerebrovascular Diseases</i> . 2013;35:748                                                                                     | abstract only |
| Keunen RWM, Palmbergen W, Van Sonderen A, Falsaf PA, Bartels E, Poppert H, Schlachetzki F, Russell D, Csiba L. Improved peri-operative neurological screening reduces postoperative delirium after cabg surgery. <i>Cerebrovascular Diseases</i> . 2011;31:24                                                                   | abstract only |
| Kishmarai T, Rukhadze I, Katsitadze Z, Kaloiani V, Chanishvili T. Heart and brain cerebral disorder and changes of polysomnographic (psg) parameters after cardiac surgery. <i>International Journal of Stroke</i> . 2014;9:198-199                                                                                             | abstract only |
| Knipp SC, Flesch M, Wilhelm H, Massoudy P, Schlamann M, Assenmacher E, Philipp T, Erdmann E, Diener HC, Jakob H. Effect of candesartan on cognitive and renal function in patients undergoing on-pump coronary artery bypass grafting: The arta trial. <i>Stroke</i> . 2009;40:e273                                             | abstract only |
| Krysta K, Woznica A, Krzych L, Pawlak A, Skarysz J, Eysmontt Z, Krupka-Matuszczyk I, Bochenek A, Cisowski M, Janas-Kozik M. Analysis of correlation between intensity of anxiety, depression and cognitive functions - before and after coronary artery bypass surgery. <i>European Psychiatry</i> . 2010;25:no pagination      | abstract only |
| Krysta K, Woznica A, Krzych LJ, Pawlak A, Skarysz J, Eysmontt Z, Krupka-Matuszczyk I, Bochenek A, Cisowski M. Cognitive functioning in young, professionally active men after cabg operation. <i>European Psychiatry</i> . 2011;26:no pagination                                                                                | abstract only |
| Krzych LJ, Woznica A, Pawlak A, Skarysz J, Eysymontt Z, Krupka-Matuszczyk I, Bochenek A, Cisowski M. Quality of life in young and professionally active men undergoing on-pump coronary artery bypass grafting. <i>European Neuropsychopharmacology</i> . 2009;19:S336                                                          | abstract only |
| Kumpaitiene B, Svagzdiene M, Sirvinskas E, Zakelis R, Petkus V, Chomskis R, Ragauskas A, Benetis R. Disorder of cerebrovascular autoregulation during cardiac surgery with cpb and its relation with the rate of post-operative cognitive dysfunction. <i>Journal of cardiothoracic and vascular anesthesia</i> . 2016;30:S5-S6 | abstract only |
| Kuzma E, Airdrie J, Littlejohns TJ, Lourida I, Thompson-Coon J, Lang IA, Scrobotovici M, Thacker E, Fitzpatrick AL, Kuller LH, et al. Coronaryartery bypass graft surgery and dementia risk in the cardiovascular health study. <i>Alzheimer's and Dementia</i> . 2016;12:P248-P249                                             | abstract only |
| La Pier T. The predictive value of the timed-up-and-go on disability in older patients 1-year after coronary artery bypass surgery. <i>Physiotherapy (United Kingdom)</i> . 2011;97:eS663                                                                                                                                       | abstract only |
| Langebartels G, Strauch J, Naraghi H, Liakopoulos O, Choi YH, Wahlers T. Only cabg procedures on pump lead to significant early postoperative increase in neurone specific enolase (nse) levels leading to deficits in neurocognitive abilities. <i>Thoracic and Cardiovascular Surgeon</i> . 2010;58:no pagination             | abstract only |
| Lazibat I, Sutlic Z, Brkic K, Rudez I, Baric D, Unic D, Jonjic D. Predictors of the short-term neurocognitive outcome following coronary revascularization depending on the use of cardiopulmonary bypass. <i>Interactive cardiovascular and thoracic surgery</i> . 2011;12:S111                                                | abstract only |
| Li N, Wang DX, Mu DL, Shan GJ. Impact of early postoperative delirium on long-term survival rate, cognitive function, and quality of life in patients after coronary artery bypass graft surgery. <i>British Journal of Anaesthesia</i> . 2012;108:549p-550p                                                                    | abstract only |
| Likhvantsev V, Grebenchikov O, Shaibakova V, Levikov D, Cherpakov R. Neuroprotective effect of volatile induction and maintenance of the anesthesia (vima) vs. Total intravenous anesthesia (tiva) during on-pump coronary artery bypass grafting (cabg). <i>European Journal of Anaesthesiology</i> . 2013;30:54               | abstract only |
| Lin IH, Oldham M, Hawkins K, Scoutt L, Yuh D, Lee H. Depression predicts delirium after coronary artery bypass graft surgery independent of cognitive impairment and cerebrovascular disease: An analysis of the noahs study. <i>American Journal of Geriatric Psychiatry</i> . 2019;27 (3 Supplement):S160-S161                | abstract only |
| Loblein H, Dzemali O, Haab A, Haussler A, Graves K, Schurr U, Odavic D, Seiffert B, Genoni M. The impact of preoperative anaemia on patients undergoing coronary bypass surgery. <i>Thoracic and Cardiovascular Surgeon</i> . 2011;59:no pagination                                                                             | abstract only |

|                                                                                                                                                                                                                                                                                                                                                                                                                        |               |
|------------------------------------------------------------------------------------------------------------------------------------------------------------------------------------------------------------------------------------------------------------------------------------------------------------------------------------------------------------------------------------------------------------------------|---------------|
| Losenno K, Peterson M, Ouzounian M, Whitlock R, Dagenais F, Boodhwani M, Bhatnagar G, Poostizadeh A, Pozeg Z, Moon M, et al. Early clinical outcomes of a novel frozen elephant trunk prosthesis: The canadian thoracic aortic collaborative experience. <i>Canadian Journal of Cardiology</i> . 2017;33 (10 Supplement 1):S86                                                                                         | abstract only |
| Mankute A, Usas E, Sirvinskas E, Andrejaitiene J. Assessment of short-term cognitive function in patients undergoing coronary artery bypass graft surgery with or without intraoperative external head cooling technique: Pilot study. <i>European Journal of Anaesthesiology</i> . 2012;29:1                                                                                                                          | abstract only |
| Marchioli R, Mozaffarian D, Silletta G, Macchia A, Ferrazzi P, Gardner T, Latini R, Libby P, Lombardi F, O'Gara P, et al. Fish oil for the prevention of post-operative atrial fibrillation - the omega-3 fatty acids for prevention of post-operative atrial fibrillation (opera) trial. <i>Circulation</i> . 2012;126:2781                                                                                           | abstract only |
| Martinovic I, Lindemann S, Iqbal M, Mirat J, Vcev A, Wittlinger T, Noutsias M. Promising 12-months clinical results for anaortic multivessel all-arterial minimally invasive direct coronary bypass surgery via distal mini-sternotomy. <i>European Journal of Heart Failure</i> . 2018;20 (Supplement 1):486                                                                                                          | abstract only |
| Menditto E, Nervo E, Lombardo E, Taglieri C, Piccolo S, Vallauri P, De Blasi M, Feola M. The correlation between cognitive impairment and prognostic parameters in patients with congestive heart failure or after cardiac surgery. <i>European Journal of Cardiovascular Prevention and Rehabilitation</i> . 2010;17:S107                                                                                             | abstract only |
| Merino JG, Latour LL, Tso AR, Lee KY, Kang DW, Davis LA, Warach S. Blood-brain barrier disruption after cardiac surgery. <i>Stroke</i> . 2011;42:e90                                                                                                                                                                                                                                                                   | abstract only |
| Mickle A, Budelier T, Burton J, Oberhaus J, Park D, McKinnon S, Avidan M. Effect of intubation duration on postoperative delirium after cardiac surgery. <i>Anesthesia and Analgesia</i> . 2018;126 (4 Supplement 1):283                                                                                                                                                                                               | abstract only |
| Mishchenko TS, Kharina KV, Dmytriieva OV, Derevetska VG. Dynamic changes of cognitive conditions in patients after different types of cardiac surgery. <i>European Stroke Journal</i> . 2018;3 (1 Supplement 1):476-477                                                                                                                                                                                                | abstract only |
| Miyazaki S, Yoshitani K, Miura T, Ohnishi Y. Predictors of postoperative delirium and stroke after off-pump coronary artery bypass surgery. <i>Journal of neurosurgical anesthesiology</i> . 2008;20:330                                                                                                                                                                                                               | abstract only |
| Mufti HN, Abidi S, Abidi SR, Hirsch GM. Predictors of post-operative delirium in cardiac surgery patients; a machine learning approach. <i>Canadian Journal of Cardiology</i> . 2014;30:S237-S238                                                                                                                                                                                                                      | abstract only |
| Muller Moran H, Maguire D, Kowalski S, Jacobsohn E, Mackenzie G, Grocott H, Arora R. Effect of earlier extubation on postoperative delirium after coronary artery bypass grafting. <i>Canadian Journal of Cardiology</i> . 2017;33 (10 Supplement 1):S92                                                                                                                                                               | abstract only |
| Nervo E, Menditto E, Lombardo E, Taglieri C, Piccolo S, Vallauri P, Peano M, Feola M. Efficacy of the cardiovascular rehabilitation in patients with congestive heart failure or after cardiac surgery. <i>European Journal of Cardiovascular Prevention and Rehabilitation</i> . 2010;17:S21                                                                                                                          | abstract only |
| Niemann B, Salzmann M, Giesler T, Rohrbach S, Mirow N, Vogt S, Grieshaber P, Roth P, Boning A. New onset postoperative atrial fibrillation: Relevance of peri- and intraoperative characteristics for incidence of atrial fibrillation and patient outcome? <i>Thoracic and Cardiovascular Surgeon</i> . Conference: 47th Annual Meeting of the German Society for Thoracic and Cardiovascular Surgery, DGTHG. 2018;66 | abstract only |
| Niemeyer-Guimaraes M, Cendoroglo MS, Mello-Almada C. Functional capacity of older adults undergoing coronary artery bypass graft surgery: A 6 months follow-up. <i>Journal of General Internal Medicine</i> . 2013;28:S80                                                                                                                                                                                              | abstract only |
| Norkiene I, Ivaskevicius J. Impact of preoperative anxiety and depression on postoperative cognitive decline and outcomes after coronary artery bypass grafting. <i>Interactive cardiovascular and thoracic surgery</i> . 2010;10:S201                                                                                                                                                                                 | abstract only |
| Norkiene I, Samalavicius R, Misiuriene I, Ivaskevicius J, Seeberger M, Jakobsen CJ, Manners J. Asymptomatic carotid artery stenosis and postoperative cognitive outcome in patients undergoing on-pump coronary artery bypass grafting. <i>Journal of cardiothoracic and vascular anesthesia</i> . 2010;24:S34                                                                                                         | abstract only |
| Norkiene I, Samalavicius R, Ivaeius J. Asymptomatic carotid artery stenosis and cognitive outcomes after coronary artery bypass grafting. <i>Journal of vascular surgery</i> . 2012;55:614                                                                                                                                                                                                                             | abstract only |
| Oldham M, Lee HB. Mild cognitive impairment predicts post-operative delirium after coronary artery bypass graft surgery: Preliminary data from the neuropsychiatric outcomes after heart surgery study. <i>American Journal of Geriatric Psychiatry</i> . 2015;23:S71-S72                                                                                                                                              | abstract only |



|                                                                                                                                                                                                                                                                                                                                                                                                     |               |
|-----------------------------------------------------------------------------------------------------------------------------------------------------------------------------------------------------------------------------------------------------------------------------------------------------------------------------------------------------------------------------------------------------|---------------|
| O'Neal J, Dighe S, Gray K, Lerner A, Talmor D, Marcantonio E, Subramaniam B. The use of dexmedetomidine and intravenous acetaminophen for the prevention of postoperative delirium in cardiac surgery patients over 60 years of age: A pilot study. <i>Anesthesia and analgesia</i> . 2015;120:S411                                                                                                 | abstract only |
| O'Neal JB, Liu X, Shotwell MS, Liang Y, Shaw A, Shah A, Billings FT. Exposure to cardiopulmonary bypass during coronary artery bypass surgery and postoperative delirium. <i>Anesthesia and analgesia</i> . 2016;122:S56                                                                                                                                                                            | abstract only |
| O'Neal JB, Liu X, Shotwell MS, Liang Y, Shaw A, Shah A, Billings FT. Impact of preoperative statin or beta blocker use and delirium following cardiac surgery. <i>Anesthesia and analgesia</i> . 2016;122:S57                                                                                                                                                                                       | abstract only |
| O'Neill B, Taylor F, Vohra A. Health, survival and quality of life after coronary artery bypass grafting: A ten year follow-up study. <i>Journal of cardiothoracic and vascular anesthesia</i> . 2011;25:S1                                                                                                                                                                                         | abstract only |
| O'Neill B, Taylor F, Vohra A. Quality of life is improved after coronary artery bypass grafting-a 10-year follow-up study. <i>Interactive cardiovascular and thoracic surgery</i> . 2011;12:S18                                                                                                                                                                                                     | abstract only |
| Ovchinnikov D, Garnyuk V, Vorobiev E, Beltiukov P, Grebennik V, Gordeev M, Barantsevich E. Postoperative cognitive decline after cabg-association between cytokines profile and matrix metalloproteinases 2 and 9. <i>Journal of the Neurological Sciences</i> . 2017;381 (Supplement 1):770-771                                                                                                    | abstract only |
| Pacini D, Di Marco L, Marsilli D, Pettinato C, Tonon C, Fonti C, Lodi R, Di Bartolomeo R. Cerebral function and metabolism after antegrade selective cerebral perfusion in aortic arch surgery. <i>Interactive cardiovascular and thoracic surgery</i> . 2009;9:S91                                                                                                                                 | abstract only |
| Palotas A, Reis H, Teixeira A, Mukhamedyarov M, Rizvanov A, Janka Z, Kalman J. Introducing post-surgical alzheimer's disease. <i>European journal of neurology</i> . 2010;17:74                                                                                                                                                                                                                     | abstract only |
| Parhar H, Reimer-Kent J, Merchant RN. A rapid recovery pathway for cabg surgery: One institutional experience. <i>Canadian Journal of Anesthesia</i> . 2013;60:S97                                                                                                                                                                                                                                  | abstract only |
| Patel N, Janus J, Banahan C, Horsfield MA, Evans DH, Chung E. Acute neuroimaging cerebral ischemic lesions on fluid-attenuated inversion recovery imaging are not associated with neuropsychological decline after cardiac surgery. <i>International Journal of Stroke</i> . 2014;9:53                                                                                                              | abstract only |
| Patel N, Janus J, Banahan C, Spyt T, Evans DH, Chung EML, Azevedo E, Oliveira V, Sargento-Freitas J, Russell D, et al. The number and timing of cerebral emboli during cardiac surgery in conjunction with post-operative mri scans and neuropsychological tests. <i>Cerebrovascular Diseases</i> . 2013;35:70                                                                                      | abstract only |
| Pereira M, Jung P, Tangri N, Hiebert B, Freed DH, Arora RC. The impact of frailty on post-operative delirium in patients undergoing cardiac surgery. <i>Canadian Journal of Cardiology</i> . 2013;29:S206                                                                                                                                                                                           | abstract only |
| Perez-Belmonte LM, San Roman-Teran CM, Jimenez-Navarro M, Barbancho MA, Garcia-Alberca JM, Lara JP. Assessment of long-term cognitive impairment after off-pump coronary-artery bypass grafting and related risk factors. <i>Journal of the American Medical Directors Association</i> . 2015;16:263.e269-211                                                                                       | abstract only |
| Perthel M, Daum I. Comparison of the neurocognitive sequelae of coronary artery bypass grafting (cabg) using conventional (cecc) or minimized extracorporeal circulation (minecc). <i>Canadian Journal of Cardiology</i> . 2011;27:S96-S97                                                                                                                                                          | abstract only |
| Petkus V, Kumpaitiene B, Svagzdiene M, Sirvinskas E, Zaklelis R, Krakauskaite S, Chomskis R, Benetis R, Ragauskas A. System of real-time non-invasive diagnosis of cerebrovascular autoregulation impairments during cardiac surgery with cardiopulmonary bypass and assessment of postoperative deterioration of cognitive functions. <i>Cerebrovascular Diseases</i> . 2017;43 (Supplement 1):124 | abstract only |
| Petkus V, Zakelis R, Kumpaitiene B, Svagzdiene M, Sirvinskas E, Adomaitiene V, Krakauskaite S, Chomskis R, Ragauskas A, Benetis R. Cerebrovascular autoregulation impairments during cardiac surgery with cardiopulmonary bypass are related to postoperative cognitive deterioration. <i>European Journal of Neurology</i> . 2018;25 (Supplement 1):49-50                                          | abstract only |
| Pirat A, Komurcu O, Camkiran A, Arslan G, Bayraktar N, Sezgin A. A comparison of hemodynamic effects of etomidatimidazolam and ketamine-midazolam for anesthesia induction in coronary artery bypass grafting surgery. <i>Intensive care medicine</i> . 2013;39:S414                                                                                                                                | abstract only |
| Ponea AM, Hsieh SJ, Fuster D, Gong MN. Safety and tolerability of intranasal insulin in older critically ill patients. <i>American Journal of Respiratory and Critical Care Medicine</i> . 2015;191:no pagination                                                                                                                                                                                   | abstract only |

|                                                                                                                                                                                                                                                                                                              |               |
|--------------------------------------------------------------------------------------------------------------------------------------------------------------------------------------------------------------------------------------------------------------------------------------------------------------|---------------|
| Pugsley W, Klinger L, Newman S, Harrison M, Paschalis C. The role of microemboli in the neuropsychological sequelae of coronary artery bypass surgery (abstract). <i>J Neurol Neurosurg Psych.</i> 1994;57:249-250                                                                                           | abstract only |
| Qiubo Q, Qi B. Study the correlation between evaluation of cerebrovascular function by 320 dynamic volume ct and neurological complications after off-pump coronary artery bypass graft. <i>Journal of the American College of Cardiology.</i> 2014;64:C201                                                  | abstract only |
| Rasmussen LA, Jakobsen CJ. Cognitive dysfunction after cardiac anaesthesia is associated with prolonged hospital stay. <i>Intensive care medicine.</i> 2012;38:S97                                                                                                                                           | abstract only |
| Regieli JJ, Sauer AMC, Dieleman JM, Dijk DV, Jansen EW, Grobbee DE, Stella PS, De Jaegere PP, Doevendans PA, Nathoe HM. Long-term neurocognitive outcome after off-pump coronary artery bypass grafting versus percutaneous coronary intervention: The octopus study. <i>Circulation.</i> 2010;120:2155      | abstract only |
| Reineke D, Konig T, Meszaros K, Sodeck G, Erdoes G, Englberger L, Czerny M, Carrel T. Cognitive brain function after coronary bypass grafting with minimal invasive extracorporeal circulation. <i>Interactive cardiovascular and thoracic surgery.</i> 2014;19:S722                                         | abstract only |
| Ringaitiene D, Norkiene I, Sipylaite J. Increased incidence of postoperative delirium in patients with risk of malnutrition undergoing coronary artery bypass grafting. <i>Acta Anaesthesiologica Scandinavica, Supplement.</i> 2013;57:20                                                                   | abstract only |
| Rothenthaler HB. The effects of cardiac surgical procedures on health-related quality of life, cognitive performance, and emotional status outcomes: A prospective 6-month follow-up study. <i>Psychiatria Danubina.</i> 2010;22:135-136                                                                     | abstract only |
| Russell D. Monitoring the brain during invasive cardiovascular examinations and surgery. <i>European Journal of Neurology.</i> 2018;25 (Supplement 1):1-2                                                                                                                                                    | abstract only |
| Rustenbach C, Baumbach H, Nagib R, Michaelsen J, Hipp G, Pressmar M, Leinweber M, Franke U, Pohl U, Sperandio M. Minimally invasive versus conventional extracorporeal circulation in minimally invasive cardiac valve surgery. <i>Journal of Vascular Research.</i> 2011;48:321-322                         | abstract only |
| Ryhammer PK, Rasmussen LA, Jakobsen CJ. Early extubation after cardiac surgery is associated with better postoperative cognitive function. <i>Applied Cardiopulmonary Pathophysiology.</i> 2013;17:151                                                                                                       | abstract only |
| Saager L, You J, Kurz A, Turan A. Can the memorial delirium assessment scale be utilized for early identification of delirium onset? <i>Critical care medicine.</i> 2011;39:133                                                                                                                              | abstract only |
| Sabashnikov A, Choi YH, Rahmanian PB, Zerriouh M, Mehler TO, Wahlers T, Wittwer T. Outcomes in patients undergoing surgery with a minimized extracorporeal circulation compared to off pump revascularization. <i>Thoracic and Cardiovascular Surgeon.</i> 2012;60:no pagination                             | abstract only |
| Sahan C, Sivrikoz N, Sungur Z, Gurvit H, Senturk M, Camci E. Effects of near-infrared spectroscopy on cognitive dysfunction for patients undergoing elective coronary surgery. <i>Applied Cardiopulmonary Pathophysiology.</i> 2014;18:99                                                                    | abstract only |
| Sayilgan C, Erdotan C, Yuceyar L, Erolcay H, Catlar S, Konukotlu D, Omeroglu S, Firtina S, Balciotlu I, Ipek G. Prophylactic use of pentoxifylline on cognitive function and biochemical markers for brain damage in on-pump cabg patients. <i>European Journal of Anaesthesiology.</i> 2011;28:63           | abstract only |
| Scheeren TWL, van Harten AE, Kok WF, Absalom AR. Intraoperative cerebral tissue oxygenation and postoperative cognitive dysfunction after on and off-pump coronary artery bypass surgery - a randomized study. <i>Applied Cardiopulmonary Pathophysiology.</i> 2012;16:347-349                               | abstract only |
| Schonburg M, Schwarz N, Bachmann G, Kaps M, Klovekorn W, Sammer G, Tschernatsch M, Nottbohm R, Blaes F, Gerriets T. Early prediction of long-term neurobehavioral outcome after coronary artery bypass surgery. <i>Thoracic and Cardiovascular Surgeon.</i> nd;58:no pagination                              | abstract only |
| Schwarz N, Schonburg M, Mollmann H, Kastaun S, Kaps M, Bachmann G, Sammer G, Hamm C, Walter T, Gerriets T. Cognitive decline and ischemic micro-lesions after coronary catheterization. A comparison to coronary artery bypass grafting and healthy volunteers. <i>Cerebrovascular Diseases.</i> 2011;31:295 | abstract only |
| Selnes OA, McKhann GM, Grega MA, Baumgartner WA, Pham L, Zeger S. Impact of coronary artery disease on long-term cognitive outcome. <i>Annals of neurology.</i> 2009;66:S40-S41                                                                                                                              | abstract only |
| Sharka I, Quka A, Sotiri E, Gjyli L, Myftiu S. Poor sleep quality and its influence on the development of acute cognitive disorders (delirium) in acute cardiac patients. <i>European Heart Journal: Acute Cardiovascular Care.</i> 2013;2:85-86                                                             | abstract only |

|                                                                                                                                                                                                                                                                                                                                       |               |
|---------------------------------------------------------------------------------------------------------------------------------------------------------------------------------------------------------------------------------------------------------------------------------------------------------------------------------------|---------------|
| Shmyrev V, Ponomarev D, Lomivorotov V. Effects of remote ischaemic preconditioning on cognitive function and neurologic injury in cardiac surgery. <i>Applied Cardiopulmonary Pathophysiology</i> . 2014;18:59                                                                                                                        | abstract only |
| Shonbin AN, Zavolozhin AS, Bystrov DO, Elisarov MV, Yarkovoy MA. 'Don't touch aorta' technique in off-pump coronary artery bypass grafting reduces the incidence of postoperative neurological complications. <i>Interactive cardiovascular and thoracic surgery</i> . 2011;12:S92-S93                                                | abstract only |
| Siepe M, Pfeiffer T, Gieringer A, Zemann S, Benk C, Schlensak C, Beyersdorf F. Increased systemic perfusion pressure during cardiopulmonary bypass protects against postoperative cognitive dysfunction. <i>Interactive cardiovascular and thoracic surgery</i> . 2010;11:S85                                                         | abstract only |
| Silva FCP, Schmidt AP, Oses JP, Pinto KO, Carmona MJC, Auler Jr J. Increased serum levels of s100b protein and neuron-specific enolase (nse) in patients after cabg surgery: Is there any correlation with postoperative cognitive dysfunction? <i>European Journal of Anaesthesiology</i> . 2012;29:105                              | abstract only |
| Singh D, Lohchab SS. Normothermic cardiopulmonary bypass: Our experience-dharmveer singh. <i>Journal of Extra-Corporeal Technology</i> . 2009;41:A2                                                                                                                                                                                   | abstract only |
| Skitek M, Jerin A, Kristl J, Marc J, Kikelj D. Serum biomarkers in ischemic neurological complications. <i>European Journal of Pharmaceutical Sciences</i> . 2011;44:60-61                                                                                                                                                            | abstract only |
| Skoloudik D, Hurtikova E, Brat R, Herzig R. Sonolysis in prevention of brain infarction during cardiac surgery (sonorescue): A randomized, controlled trial. <i>Journal of the Neurological Sciences</i> . 2015;357:e411                                                                                                              | abstract only |
| Skoloudik D, Kuliha M, Hurtikova E, Roubec M, Herzig R, Sanak D, Kral M, Prochazka V, Hrbac T, Brat R. On-going clinical trials effect of sonolysis on a risk reduction of brain infarction during cardiac or carotid interventions: A prospective study. <i>International Journal of Stroke</i> . 2014;9:253                         | abstract only |
| Skoloudik D, Kuliha M, Roubec M, Hurtikova E, Herzig R, Kral M, Goldirova A, Prochazka V, Hrbac T, Brat R, et al. Effect of sonolysis on a risk reduction of brain infarction during cardiac or carotid interventions. A prospective study. <i>Cerebrovascular Diseases</i> . 2014;37:25                                              | abstract only |
| Skoloudik D, Kuliha M, Roubec M, Hurtikova E, Herzig R, Kral M, Goldirova A, Prochazka V, Hrbac T, Brat R. Effect of sonolysis on a risk reduction of brain infarction during cardiac or carotid interventions. <i>Cerebrovascular Diseases</i> . 2014;38:95                                                                          | abstract only |
| Soinne L, Rantanen K, Hietanen M, Vento A, Ramo J, Roine RO. Long-term cognitive decline after coronary surgery is primarily patientrelated. <i>European journal of neurology</i> . 2012;19:542                                                                                                                                       | abstract only |
| Sorrentino F, Franciosi G, Torre T, Faeli M, Riva Muzio S, Siclari F. Low perioperative mortality, good survival and quality of life following cabg surgery in octogenarians. <i>Kardiovaskulare Medizin</i> . 2011;14:29S                                                                                                            | abstract only |
| Spence J, Bosch J, Sharma M, Cukierman-Yaffe T, Canavan M, Belley-Cote E, Whitlock R, Devereaux PJ, Lamy A. Predictors of cognitive decline after cardiac surgery: An evaluation of the cabg off or on pump revascularization study (coronary) cohort. <i>European Heart Journal</i> . 2017;38 (Supplement 1):445-446                 | abstract only |
| Strauch J, Langebartels G, Wittwer T, Liakopoulos O, Wahlers T. On-pump cabg procedures lead to significant early postoperative increase in neuron specific enolase (nse) levels and show deficits in neurocognitive abilities. <i>Innovations: Technology and Techniques in Cardiothoracic and Vascular Surgery</i> . 2010;5:215-216 | abstract only |
| Sun L, Ding S, Feng X, Wu F, Su P, Shen Y, Zhao H, Wu Y. Higher serum interleukin-6 is a strong postoperative predictor of delirium after isolated coronary artery bypass graft surgery. <i>Circulation</i> . 2014;130:no pagination                                                                                                  | abstract only |
| Svagzdienne M, Kumpaitiene B, Sirvinskas E, Zakelis R, Petkus V, Ragauskas A, Benetis R. Cerebrovascular autoregulation impairment during cardiac surgery is related to postoperative cognitive dysfunction. <i>Journal of Cardiothoracic and Vascular Anesthesia</i> . 2017;31 (Supplement 1):S3-S4                                  | abstract only |
| Szwed K, Bielinski M, Kaszewska A, Hoffmann A, Borkowska A. Neuropsychological assessment of cardiac rehabilitation following cardiac surgery - preliminary results. <i>European Psychiatry</i> . 2010;25:no pagination                                                                                                               | abstract only |
| Tabaee AS, Rostami A. Comparing neurocognitive disturbances after off-pump and on-pump coronary artery bypass graft. <i>Cardiology in the Young</i> . 2010;20:261                                                                                                                                                                     | abstract only |
| Tarasova I, Maleva O, Chernobay A, Barbarash O, Barbarash L. Impact of mild cognitive impairment on the changes in bioelectrical brain activity in patients undergoing on-pump coronary artery bypass grafting. <i>Neurodegenerative Diseases</i> . 2015;15:1696                                                                      | abstract only |

|                                                                                                                                                                                                                                                                                                                                                                           |               |
|---------------------------------------------------------------------------------------------------------------------------------------------------------------------------------------------------------------------------------------------------------------------------------------------------------------------------------------------------------------------------|---------------|
| Tarasova I, Trubnikova O, Barbarash O, Barbarash L. The changes of brain activity associated with postoperative cognitive dysfunction after coronary bypass surgery. <i>International Journal of Psychophysiology</i> . 2018;131 (Supplement):S167                                                                                                                        | abstract only |
| Tarasova IV, Trubnikova OA, Syrova ID, Barbarash OL. Eeg dynamics in patients with coronary artery disease undergoing on-pump coronary bypass surgery. <i>Interactive cardiovascular and thoracic surgery</i> . 2011;12:S86-S87                                                                                                                                           | abstract only |
| Thomaidou E, Megari K, Argiriadou E, Anastasiadis K, Kosmidou M, Paroutsidou G, Kiourtzieva E, Grosomanidis V, Ghalvatzoulis O, Taskos N, et al. Intraoperative cerebral desaturation as prognostic factor for the neurocognitive outcome and the prolonged hospitalization after coronary artery by pass grafting surgery. <i>Intensive care medicine</i> . 2010;36:S328 | abstract only |
| Thomaidou E, Megari K, Argiriadou H, Antonitsis P, Sarlis G, Anastasiadis K, Kosmidou M, Taskos N, Bretzakis G, Stamatiou G, et al. Erythromycin and neuroprotection in coronary artery bypass surgery (cabg). <i>Journal of cardiothoracic and vascular anesthesia</i> . 2011;25:S40                                                                                     | abstract only |
| Toeg HD, Nathan H, Rubens F, Wozny D, Boodhwani M. Clinical impact of neurocognitive deficits following cardiac surgery. <i>Canadian Journal of Cardiology</i> . 2012;28:S287                                                                                                                                                                                             | abstract only |
| Trubnikova O, Argunova Y, Mamontova A, Barbarash O. Effect of 3 weeks of aerobic exercise training on neuropsychological status of patients undergoing coronary artery bypass grafting. <i>European Heart Journal</i> . 2014;35:899-900                                                                                                                                   | abstract only |
| Trubnikova O, Tarasova I, Maleva O, Syrova I, Barbarash O. Cognitive outcomes in patients after coronary artery bypass grafting at five-year follow-up. <i>International Journal of Psychophysiology</i> . 2018;131 (Supplement):S169                                                                                                                                     | abstract only |
| Trubnikova OA, Tarasova IV, Artamonova AI, Syrova ID, Barbarash OL. Dynamics of neurophysiologic parameters in coronary heart disease patients with internal carotid artery stenosis undergoing coronary bypass surgery. <i>Interactive cardiovascular and thoracic surgery</i> . 2011;12:S89                                                                             | abstract only |
| Trubnikova OA, Tarasova IV, Maleva OV, Kagan ES, Barbarash OL, Barbarash LS. Factors for the development of persistent postoperative cognitive dysfunction in patients undergoing coronary artery bypass surgery under extracorporeal circulation. [russian]. <i>Terapevticheskii Arkhiv</i> . 2017;89:41-47                                                              | abstract only |
| Tsaousi G, Pitsis A, Deliaslani D, Karakoulas K, Vasilakos D. Cerebral oxygen indices impairment during off-pump coronary revascularization and its relevance to early intellectual dysfunction. <i>European Journal of Anaesthesiology</i> . 2009;26:60                                                                                                                  | abstract only |
| Tsitlidze E, Rukhadze I, Chanishvili T. Changes of polysomnography (psg ) parameters in patients with cognitive disorders after cardiac surgery. <i>Journal of Sleep Research</i> . 2016;25:136                                                                                                                                                                           | abstract only |
| Tsygan N, Andreev R, Golokhvastov S, Karpova O, Peleshok A, Kurasov E, Odinak M. Prevention of postoperative cerebral dysfunction after coronary artery bypass surgery with cardiopulmonary bypass. <i>Cerebrovascular Diseases</i> . 2018;45 (Supplement 1):385                                                                                                          | abstract only |
| Tsygan N, Trashkov A, Andreev R, Yakovleva V, Pometko D, Khubulava G, Litvinenko I, Odinak M. Perioperative stroke and other clinical types of postoperative cerebral dysfunction in coronary artery bypass surgery. <i>Cerebrovascular Diseases</i> . 2018;45 (Supplement 1):53                                                                                          | abstract only |
| Vedel AG, Holmgaard F, Rasmussen L, Langkilde A, Paulson OB, Olsen PS, Lange T, Ravn HB, Nilsson JC. The influence of mean arterial pressure during cardiopulmonary bypass on cerebral complications. <i>Journal of Cardiothoracic and Vascular Anesthesia</i> . 2017;31 (Supplement 1):S14                                                                               | abstract only |
| Vorobyeva M, Villevaude S, Kobalava Z. Intensive statin therapy has no impact on cognition in high cardiovascular risk patients. <i>European Journal of Heart Failure</i> . 2017;19 (Supplement 1):100-101                                                                                                                                                                | abstract only |
| Widmann C, Semmler A, Okulla T, Urbach H, Kaiser M, Widman G, Mormann F, Weide J, Fliessbach K, Klockgether T, et al. Sepsis and cognition. <i>Journal of Nutrition, Health and Aging</i> . 2012;16:866                                                                                                                                                                   | abstract only |
| Wittwer T, Sabashnikov A, Choi YH, Rahmanian P, Zerious M, Wahlers T. Superior outcomes in patients undergoing surgery with a minimized extracorporeal circulation compared to off-pump revascularization. <i>Innovations: Technology and Techniques in Cardiothoracic and Vascular Surgery</i> . 2012;7:99                                                               | abstract only |
| Woznica A, Krzych LJ, Pawlak A, Skarysz J, Eysymontt Z, Krupka-Matuszczyk I, Krysta K, Bochenek A, Cisowski M. Evaluation of cognitive functioning in young, professionally active men after coronary bypass. <i>European Neuropsychopharmacology</i> . 2009;19:S359                                                                                                      | abstract only |

|                                                                                                                                                                                                                                                                                                                           |                             |
|---------------------------------------------------------------------------------------------------------------------------------------------------------------------------------------------------------------------------------------------------------------------------------------------------------------------------|-----------------------------|
| Yamada U, Yokota K, Ohta D, Furukawa K. Delirium could be an indicator of sepsis in patients under 65 years old with urinary tract infections. <i>Critical Care</i> . 2012;16:S121                                                                                                                                        | abstract only               |
| Yassin A, Wood M, Lowther C. Master follower cardioplegia versus standard cardioplegia in coronary artery bypass graft surgery. <i>Critical care medicine</i> . 2013;41:A72                                                                                                                                               | abstract only               |
| Yulia Argunova Y, Maleva O, Syrova I, Barbarash O. Exercise training as a rehabilitation method for early postoperative cognitive dysfunction in patients undergoing coronary artery bypass grafting. <i>European Journal of Preventive Cardiology</i> . 2015;22:S79                                                      | abstract only               |
| Yulia Argunova Y, Trubnikova OA, Kagan ES, Barbarash OL. Cerebroprotective effects of physical training in patients undergoing coronary artery bypass grafting. <i>European Journal of Preventive Cardiology</i> . 2017;24 (1 Supplement 1):S149                                                                          | abstract only               |
| Yulia Argunova Y, Trubnikova OA, Kagan ES, Barbarash OL. High adherence to treatment as a promising method of effective prevention of postoperative cognitive dysfunction in patients after coronary artery bypass grafting. <i>European Journal of Preventive Cardiology</i> . 2018;25 (2 Supplement 1):S126             | abstract only               |
| Zakharov V, Hussain A, Smetkin A, Kirov M. Comparison of sevoflurane and propofol anesthesia during off-pump coronary artery bypass grafting: Effects on cerebral oxygenation and cognitive function. <i>European Journal of Anaesthesiology</i> . 2014;31:120                                                            | abstract only               |
| Zillami B, Basha E, Cekrezi B, Kruja J. Correlation between white matter lesions and neurological complication after cardiac surgery. <i>European journal of neurology</i> . 2012;19:182                                                                                                                                  | abstract only               |
| Chernov VI, Efimova NY, Efimova IY, Akhmedov SD, Lishmanov YB. Cognitive function and cerebral perfusion in off-pump and on-pump coronary artery bypass patients. <i>Research focus on cognitive disorders</i> . 2007:71-85                                                                                               | book/chapter                |
| Mattlar C-E, Knuts L-R, Engblom E, Vanttinen E, Willner AERG. Neuropsychological findings and personality structure associated with coronary artery bypass surgery (cabs): An eight month follow-up study. <i>Impact of cardiac surgery on the quality of life: Neurological and psychological aspects</i> . 1990:211-219 | book/chapter                |
| Newman S, Klinger L, Venn G, Smith P, Harrison M, Treasure T, Willner AERG. The persistence of neuropsychological deficits twelve months after coronary artery bypass surgery. <i>Impact of cardiac surgery on the quality of life: Neurological and psychological aspects</i> . 1990:173-179                             | book/chapter                |
| Newman S, Smith P, Treasure T, Joseph P, Ell P, Harrison M, Johnston MMT. Acute neuropsychological consequences of coronary bypass artery surgery. <i>Applications in health psychology</i> . 1989:121-130                                                                                                                | book/chapter                |
| Futterman LG, Lemberg L. Encephalopathies following cardiac surgery. <i>American journal of critical care : an official publication, American Association of Critical-Care Nurses</i> . 1998;7:450-453                                                                                                                    | case study                  |
| Anon. Effect of remote ischemic preconditioning on cognitive function after off-pump coronary artery bypass graft. <i>ClinicalTrials.gov</i> 2009                                                                                                                                                                         | clinical trial registration |
| Awad H, Essandoh M. Goal-directed oxygen delivery during cardiopulmonary bypass: Can this perfusion strategy improve biochemical and clinical neurologic outcomes? <i>Journal of Cardiothoracic and Vascular Anesthesia</i> . 2018;32:2493-2494                                                                           | comment/letter              |
| Barbero C, Centofanti P, D'Agata F, Mortara P, Rinaldi M. Late neuropsychologic outcome after hypothermic circulatory arrest: Is there cause for concern? <i>Journal of Cardiothoracic &amp; Vascular Anesthesia</i> . 2018;32:e1-e3                                                                                      | comment/letter              |
| Blauth C, Griffin S, Harrison M, Klinger L, Newman S, Pugsley W, Smith P, Taylor K, Treasure T, Venn G, et al. Neuropsychologic alterations after cardiac operation. <i>Journal of Thoracic and Cardiovascular Surgery</i> . 1989;98:454-455                                                                              | comment/letter              |
| Forcillo J, Perrault LP. If too frail, functional benefit following cardiac surgery may fail: A role for prehabilitation? <i>Journal of Thoracic and Cardiovascular Surgery</i> . 2017;154:2000-2001                                                                                                                      | comment/letter              |
| Grocott HP. Anesthetic agents and postoperative delirium after off-pump coronary bypass graft surgery: An insufficiently complex approach to a complex problem. <i>Journal of Cardiothoracic &amp; Vascular Anesthesia</i> . 2018;32:e87-e88                                                                              | comment/letter              |
| Hung W. Prolonged cognitive impairment after delirium among patients who had cardiac surgery. <i>Journal of Clinical Outcomes Management</i> . 2012;19:395-397                                                                                                                                                            | comment/letter              |

|                                                                                                                                                                                                                                                                                                                                           |                |
|-------------------------------------------------------------------------------------------------------------------------------------------------------------------------------------------------------------------------------------------------------------------------------------------------------------------------------------------|----------------|
| King N, Mann V. Why do on-pump patients live longer? <i>Aging</i> . 2018;10:2553-2554                                                                                                                                                                                                                                                     | comment/letter |
| Leslie M. The post-op brain: Surgery can cure-but it may take a toll on cognition. Some scientists blame a body-wide inflammatory response. <i>Science</i> . 2017;356:898-900                                                                                                                                                             | comment/letter |
| Lewis C, Hogue CW. Lack of benefit of near-infrared spectroscopy monitoring for improving patient outcomes. Case closed? <i>British Journal of Anaesthesia</i> . 2017;119:347-349                                                                                                                                                         | comment/letter |
| Li WA, Geng X, Ding Y. Stroke is a global epidemic: New developments in clinical and translational cerebrovascular diseases research. <i>Neurological Research</i> . 2017;39:475-476                                                                                                                                                      | comment/letter |
| Lo B, Fijnheer R, Nierich AP, Kalkman CJ, Van Dijk D. Activation of hemostasis is associated with early cognitive decline after off-pump coronary artery bypass surgery [8]. <i>Journal of Thrombosis and Haemostasis</i> . 2005;3:2114-2117                                                                                              | comment/letter |
| Mackenzie M, Hall R. Mental decline and cardiac surgery - should we go there? <i>Critical Care Medicine</i> . 2017;45:1411-1412                                                                                                                                                                                                           | comment/letter |
| Pulido JN. Cardiac surgery blues: The midterm impact of postoperative delirium and the association with mood disorders. <i>Journal of Thoracic and Cardiovascular Surgery</i> . 2018;155:668-669                                                                                                                                          | comment/letter |
| Sugita J, Fujii K. Systemic inflammatory stress response during cardiac surgery. <i>International Heart Journal</i> . 2018;59:457-459                                                                                                                                                                                                     | comment/letter |
| Ainsworth CR. Examination of post-operative cognitive decline within a cardiac sample: Analysis of the semantic clustering index on the hopkins verbal learning test-revised. <i>Dissertation Abstracts International: Section B: The Sciences and Engineering</i> . 2011;71:5779                                                         | dissertation   |
| Browne SM. Neuropsychiatric complications of coronary artery bypass graft surgery. <i>Dissertation Abstracts International: Section B: The Sciences and Engineering</i> . 2002;63:1260                                                                                                                                                    | dissertation   |
| Geishardt S. Objective and subjective neuropsychological impairment and the relationship to depression, in randomized cpb and off-pump patients, following heart surgery. <i>Dissertation Abstracts International: Section B: The Sciences and Engineering</i> . 2006;67:2833                                                             | dissertation   |
| Hedges C. Sleep, mood, memory and verbal learning in off-pump coronary artery bypass patients. <i>Dissertation Abstracts International: Section B: The Sciences and Engineering</i> . 2004;65:157                                                                                                                                         | dissertation   |
| Kamper JE. Predictors of neuropsychological status in cardiac patients. <i>Dissertation Abstracts International: Section B: The Sciences and Engineering</i> . 2014;74:No-Specified                                                                                                                                                       | dissertation   |
| Legendre SA. The influence of cognitive reserve on neuropsychological functioning after coronary artery bypass grafting. <i>Dissertation Abstracts International: Section B: The Sciences and Engineering</i> . 2004;64:5789                                                                                                              | dissertation   |
| Patel S. The impact of pomegranate on memory dysfunction after cardiac surgery. <i>Dissertation Abstracts International: Section B: The Sciences and Engineering</i> . 2011;72:3749                                                                                                                                                       | dissertation   |
| Sy MJ. Neuropsychological changes after open heart surgery. <i>Dissertation Abstracts International</i> . 1981;42:2088                                                                                                                                                                                                                    | dissertation   |
| Thompson ES. Effect of two general anesthetic agents on the cognitive function of neurologically normal adults following extracorporeal circulation for coronary artery revascularization. <i>Dissertation Abstracts International: Section B: The Sciences and Engineering</i> . 1997;58:2359                                            | dissertation   |
| Al Tmimi L, Velde M, Meyns B, Meuris B, Sergeant P, Milisen K, Pottel H, Poesen K, Rex S. Serum protein s100 as marker of postoperative delirium after off-pump coronary artery bypass surgery: Secondary analysis of two prospective randomized controlled trials. <i>Clinical chemistry and laboratory medicine</i> . 2017;54:1671-1680 | duplicate      |
| Alan Hall R, Fordyce DJ, Lee ME, Eisenberg B, Lee RF, Holmes IJH, Campbell WG. Brain spect imaging and neuropsychological testing in coronary artery bypass patients. <i>Annals of Thoracic Surgery</i> . 1999;68:2082-2088                                                                                                               | duplicate      |
| Bily B, Artemiou P, Sabol F, Bilecova-Rabajdova M, Kolarcik P, Torok P. The role of dexmedetomidine in the prevention of postoperative delirium in cardiac surgery patients. <i>Cardiology Letters</i> . 2015;24:435-444                                                                                                                  | duplicate      |

|                                                                                                                                                                                                                                                                                                                                                              |                    |
|--------------------------------------------------------------------------------------------------------------------------------------------------------------------------------------------------------------------------------------------------------------------------------------------------------------------------------------------------------------|--------------------|
| Engelhardt W, Dierks T, Pause M, Hartung E, Haaland K, Temkin N, Randahl G, Dikmen S. Early cerebral functional outcome after coronary artery bypass surgery using different acid-base management during hypothermic cardiopulmonary bypass. Recovery of simple motor skills after head injury. <i>Acta anaesthesiologica Scandinavica</i> . 1996;40:457-465 | duplicate          |
| Gorna R, Kustrzycki W, Kiejna A, Rymaszewska J. Assessment of short-term neuropsychologic changes after normothermic versus hypothermic coronary artery bypass grafting. <i>Ocena bezposrednich zmian funkcji poznawczych u pacjentow poddanych chirurgicznej rewaskularyzacji wiencowej przeprowadzonej w hipotermii i normotermii</i> . 2001;35:781-795    | duplicate          |
| Kastaun S, Gerriets T, Schwarz N, Tschernatsch M, Kaps M, Walther T, Schoenburg M. Pseudo-hallucinations following heart surgery in patients with normal vision. <i>Thoracic and Cardiovascular Surgeon</i> . 2011;59:no pagination                                                                                                                          | duplicate          |
| Khosravi A, Skrabal C, Westphal B, Kundt G, Greim B, Kunesch E, Liebold A, Steinhoff G. Evaluation of coated oxygenators in cardiopulmonary-bypass systems and their impact on neurocognitive function. <i>Perfusion</i> . 2012;20:249-254                                                                                                                   | duplicate          |
| koloudík D, Hurtíková E, Brát R, Herzig R. Sonolysis in prevention of brain infarction during cardiac surgery (sonorescue): Randomized, controlled trial. <i>Medicine (Baltimore)</i> . 2017;95:e3615                                                                                                                                                        | duplicate          |
| Meybohm P, Renner J, Broch O, Caliebe D, Albrecht M, Cremer J, Haake N, Scholz J, Zacharowski K, Bein B. Postoperative neurocognitive dysfunction in patients undergoing cardiac surgery after remote ischemic preconditioning: A double-blind randomized controlled pilot study. <i>PloS one</i> . 2016;8:e64743                                            | duplicate          |
| Mongero L, Beck, Jr., Manspeizer H, Heyer E, Lee K, Spanier T, Smith C. Cardiac surgical patients exposed to heparin-bonded circuits develop less postoperative cerebral dysfunction than patients exposed to non-heparin-bonded circuits. <i>Perfusion</i> . 2012;16:107-111                                                                                | duplicate          |
| Rothenhauser HB, Stepan A, Kapfhammer HP. The effects of cardiac surgical procedures on health-related quality of life, cognitive performance, and emotional status outcomes: A prospective 6-month follow-up study. <i>Journal of Psychosomatic Research</i> . 2010;68:660                                                                                  | duplicate          |
| Sauër A, Nathoe H, Hendrikse J, Peelen L, Regieli J, Veldhuijzen D, Kalkman C, Grobbee D, Doevendans P, Dijk D. Cognitive outcomes 7.5 years after angioplasty compared with off-pump coronary bypass surgery. <i>Ann Thorac Surg</i> . 2013;96:1294-1300                                                                                                    | duplicate          |
| Selenes OA, Royall RM, Grega MA, Borowicz LM, Jr., Quaskey S, McKhann G, Aberg BBBBBBBCCdITdLDDFFFGGGGHHKLLMM. Cognitive changes 5 years after coronary artery bypass grafting. <i>Archives of neurology</i> . 2001;58:598-604                                                                                                                               | duplicate          |
| Shroyer AL, Grover FL, Hattler B, Collins JF, McDonald GO, Kozora E, Lucke JC, Baltz JH, Novitzky D. On-pump versus off-pump coronary-artery bypass surgery. <i>New England Journal of Medicine</i> . 2009;361:1827-1837                                                                                                                                     | duplicate          |
| Spence J, Bosch J, Sharma M, Cukierman-Yaffe T, Canavan M, Belley-Cote E, Whitlock R, Devereaux P, Lamy A. Predictors of cognitive decline after cardiac surgery: An evaluation of the cabg off or on pump revascularization study (coronary) cohort. <i>Canadian Journal of Cardiology</i> . 2017;33 (10 Supplement 1):S36                                  | duplicate          |
| Stevens R, Gersbach P, Ruchat P, Hurni M, Stumpe F, Fischer A, Sadeghi H. Open-heart surgery in octogenarians. <i>Schweizerische Medizinische Wochenschrift</i> . 1995;125:2084-2089                                                                                                                                                                         | duplicate          |
| Whitaker D, Green A, Stygall J, Harrison M, Newman S. Evaluation of an alternative s100b assay for use in cardiac surgery: Relationship with microemboli and neuropsychological outcome. <i>Perfusion</i> . 2012;22:267-272                                                                                                                                  | duplicate          |
| Abu-Omar Y, Cifelli A, Matthews PM, Taggart DP. The role of microembolisation in cerebral injury as defined by functional magnetic resonance imaging. <i>European journal of cardio-thoracic surgery : official journal of the European Association for Cardio-thoracic Surgery</i> . 2004;26:586-591                                                        | inappropriate data |
| Ahlgren E, Lundqvist A, Nordlund A, Aren C, Rutberg H. Neurocognitive impairment and driving performance after coronary artery bypass surgery. <i>European journal of cardio-thoracic surgery : official journal of the European Association for Cardio-thoracic Surgery</i> . 2003;23:334-340                                                               | inappropriate data |
| Al TL, Hemelrijck J, Velde M, Sergeant P, Meyns B, Missant C, Jochmans I, Poesen K, Coburn M, Rex S. Xenon anaesthesia for patients undergoing off-pump coronary artery bypass graft surgery: A prospective randomized controlled pilot trial. <i>Br J Anaesth</i> . 2015;115:550-559                                                                        | inappropriate data |

|                                                                                                                                                                                                                                                                                                                                                                                  |                    |
|----------------------------------------------------------------------------------------------------------------------------------------------------------------------------------------------------------------------------------------------------------------------------------------------------------------------------------------------------------------------------------|--------------------|
| Al Tmimi L, Devroe S, Dewinter G, Van De Velde M, Poortmans G, Meyns B, Meuris B, Coburn M, Rex S. Xenon as an adjuvant to propofol anesthesia in patients undergoing off-pump coronary artery bypass graft surgery: A pragmatic randomized controlled clinical trial. <i>Anesthesia and Analgesia</i> . 2017;125:1118-1128                                                      | inappropriate data |
| Alex J, Laden G, Cale ARJ, Bennett S, Flowers K, Madden L, Gardiner E, McCollum PT, Griffin SC. Pretreatment with hyperbaric oxygen and its effect on neuropsychometric dysfunction and systemic inflammatory response after cardiopulmonary bypass: A prospective randomized double-blind trial. <i>The Journal of thoracic and cardiovascular surgery</i> . 2005;130:1623-1630 | inappropriate data |
| Anastasiadis K, Argiriadou H, Kosmidis M, Megari K, Antonitsis P, Thomaidou E, Aretouli E, Papakonstantinou C. Neurocognitive outcome after coronary artery bypass surgery using minimal versus conventional extracorporeal circulation: A randomised controlled pilot study. <i>Heart</i> . 2011;97:1082-1088                                                                   | inappropriate data |
| Andrew MJ, Baker RA, Bennetts J, Kneebone AC, Knight JL. A comparison of neuropsychologic deficits after extracardiac and intracardiac surgery. <i>Journal of cardiothoracic and vascular anesthesia</i> . 2001;15:9-14                                                                                                                                                          | inappropriate data |
| Andrew MJ, Baker RA, Kneebone AC, Knight JL. Neuropsychological dysfunction after minimally invasive direct coronary artery bypass grafting. <i>The Annals of thoracic surgery</i> . 1998;66:1611-1617                                                                                                                                                                           | inappropriate data |
| Antony SP, Jamuna R, Kini SM, Chakravarthy M, Alexander BBBBBBBBBBCCCCDDEF-SGGGHHKLLMMM. Neuropsychological deficits in patients with myocardial infarction. <i>Neuropsychological Trends</i> . 2010;7:37-50                                                                                                                                                                     | inappropriate data |
| Arrowsmith J, Harrison M, Newman S, Stygall J, Timberlake N, Pugsley W. Neuroprotection of the brain during cardiopulmonary bypass: A randomized trial of remacemide during coronary artery bypass in 171 patients. <i>Stroke</i> . 1998;29:2357-2362                                                                                                                            | inappropriate data |
| Askar FZ, Cetin HY, Kumral E, Cetin O, Acarer A, Kosova B, Yagdi T. Apolipoprotein e epsilon4 allele and neurobehavioral status after on-pump coronary artery bypass grafting. <i>Journal of Cardiac Surgery</i> . 2005;20:501-505                                                                                                                                               | inappropriate data |
| Aykut K, Albayrak G, Guzeloglu M, Hazan E, Tufekci M, Erdogan I. Pulsatile versus non-pulsatile flow to reduce cognitive decline after coronary artery bypass surgery: A randomized prospective clinical trial. <i>Journal of Cardiovascular Disease Research</i> . 2013;4:127-129                                                                                               | inappropriate data |
| Baker R, Andrew M, Ross I, Knight J. The octopus ii stabilizing system: Biochemical and neuropsychological outcomes in coronary artery bypass surgery. <i>Heart Surg Forum</i> . 2001;4 Suppl 1:S19-23                                                                                                                                                                           | inappropriate data |
| Bappu NJ, Venugopal P, Bisoi AK, Mankad PS. Troponin-i release after cardiac surgery with different surgical techniques and post-operative neurological outcomes. <i>McGill journal of medicine : MJM : an international forum for the advancement of medical sciences by students</i> . 2006;9:88-94                                                                            | inappropriate data |
| Barbut D, Hinton RB, Sztatowski TP, Hartman GS, Bruefach M, Williams-Russo P, Charlson ME, Gold JP. Cerebral emboli detected during bypass surgery are associated with clamp removal. <i>Stroke</i> . 1994;25:2398-2402                                                                                                                                                          | inappropriate data |
| Bar-Yosef S, Anders M, Mackensen GB, Ti LK, Mathew JP, Phillips-Bute B, Messier RH, Grocott HP. Aortic atheroma burden and cognitive dysfunction after coronary artery bypass graft surgery. <i>Annals of Thoracic Surgery</i> . 2004;78:1556-1562                                                                                                                               | inappropriate data |
| Bassano C, Bovio E, Uva F, Iacobelli S, Iasevoli N, Farinaccio A, Ruvolo G. Partially anaortic clampless off-pump coronary artery bypass prevents neurologic injury compared to on-pump coronary surgery: A propensity score-matched study on 286 patients. <i>Heart and vessels</i> . 2016;31:1412-1417                                                                         | inappropriate data |
| Bayindir O, Akpinar B, Can E, Guden M, Sonmez B, Demiroglu C. The use of the 5-HT <sub>3</sub> -receptor antagonist ondansetron for the treatment of postcardiotomy delirium. <i>Journal of cardiothoracic and vascular anesthesia</i> . 2000;14:288-292                                                                                                                         | inappropriate data |
| Bendszus M, Reents W, Franke D, Mullges W, Babin-Ebell J, Koltzenburg M, Warmuth-Metz M, Solymosi L. Brain damage after coronary artery bypass grafting. <i>Archives of neurology</i> . 2002;59:1090-1095                                                                                                                                                                        | inappropriate data |
| Bi Q, Jun-Yu L, Xiao-Qing L, Qin L, Di L, Qiu-Bo Q. The impact of intracranial artery disease and prior cerebral infarction on central nervous system complications after off-pump coronary artery bypass grafting. <i>Journal of Neurological Sciences</i> . 2014;31:247-256                                                                                                    | inappropriate data |
| Bi Q, Li JY, Li XQ, Li Q, Luo D, Qiao QB. Impact of intracranial artery disease and prior cerebral infarction on central nervous system complications after off-pump coronary artery bypass grafting. <i>Neurophysiology</i> . 2015:no pagination                                                                                                                                | inappropriate data |



|                                                                                                                                                                                                                                                                                                                                                                                                                      |                    |
|----------------------------------------------------------------------------------------------------------------------------------------------------------------------------------------------------------------------------------------------------------------------------------------------------------------------------------------------------------------------------------------------------------------------|--------------------|
| Bonacchi M, Prifti E, Maiani M, Bartolozzi F, Di Eusanio M, Leacche M. Does off-pump coronary revascularization reduce the release of the cerebral markers, s-100beta and nse? <i>Heart, Lung &amp; Circulation</i> . 2006;15:314-319                                                                                                                                                                                | inappropriate data |
| Boodhwani M, Rubens F, Wozny D, Rodriguez R, Nathan HJ. Effects of sustained mild hypothermia on neurocognitive function after coronary artery bypass surgery: A randomized, double-blind study. <i>The Journal of thoracic and cardiovascular surgery</i> . 2007;134:1443-1442                                                                                                                                      | inappropriate data |
| Borger MA, Peniston CM, Weisel RD, Vasiliou M, Green RE, Feindel CM. Neuropsychologic impairment after coronary bypass surgery: Effect of gaseous microemboli during perfusionist interventions. <i>The Journal of thoracic and cardiovascular surgery</i> . 2001;121:743-749                                                                                                                                        | inappropriate data |
| Borger MA, Rao V. Temperature management during cardiopulmonary bypass: Effect of rewarming rate on cognitive dysfunction. <i>Seminars in cardiothoracic and vascular anesthesia</i> . 2002;6:17-20                                                                                                                                                                                                                  | inappropriate data |
| Browne SM, Halligan PW, Wade DT, Taggart DP. Cognitive performance after cardiac operation: Implications of regression toward the mean. <i>The Journal of thoracic and cardiovascular surgery</i> . 1999;117:481-485                                                                                                                                                                                                 | inappropriate data |
| Bruce KM, Yelland GW, Smith JA, Robinson SR. Recovery of cognitive function after coronary artery bypass graft operations. <i>The Annals of thoracic surgery</i> . 2013;95:1306-1313                                                                                                                                                                                                                                 | inappropriate data |
| Bruggemans EF, Van de Vijver FJ, Huysmans HA. Assessment of cognitive deterioration in individual patients following cardiac surgery: Correcting for measurement error and practice effects. <i>Journal of clinical and experimental neuropsychology</i> . 1997;19:543-559                                                                                                                                           | inappropriate data |
| Bucerius J, Gummert JF, Borger MA, Walther T, Doll N, Falk V, Schmitt DV, Mohr FW. Predictors of delirium after cardiac surgery delirium: Effect of beating-heart (off-pump) surgery. <i>The Journal of thoracic and cardiovascular surgery</i> . 2004;127:57-64                                                                                                                                                     | inappropriate data |
| Butterworth J, Legault C, Stump DA, Coker L, Hammon JW, Jr., Troost BT, Royster RL, Prough DS. A randomized, blinded trial of the antioxidant pegorgotein: No reduction in neuropsychological deficits, inotropic drug support, or myocardial ischemia after coronary artery bypass surgery. <i>Journal of cardiothoracic and vascular anesthesia</i> . 1999;13:690-694                                              | inappropriate data |
| Butterworth J, Wagenknecht LE, Legault C, Zaccaro DJ, Kon ND, Hammon Jr JW, Rogers AT, Troost BT, Stump DA, Furberg CD, et al. Attempted control of hyperglycemia during cardiopulmonary bypass fails to improve neurologic or neurobehavioral outcomes in patients without diabetes mellitus undergoing coronary artery bypass grafting. <i>Journal of Thoracic and Cardiovascular Surgery</i> . 2005;130:1319      | inappropriate data |
| Buziashvili II, Ambat'ello SG, Aleksakhina IA, Pashchenkov MV. Influence of cardiopulmonary bypass on cognitive functions in patients with ischemic heart disease. <i>Zhurnal nevrologii i psikiatrii imeni S.S. Korsakova / Ministerstvo zdravookhraneniia i meditsinskoj promyshlennosti Rossiiskoi Federatsii, Vserossiiskoe obshchestvo nevrologov [i] Vserossiiskoe obshchestvo psikiatrov</i> . 2005;105:30-35 | inappropriate data |
| Carella F, Travaini G, Contri P, Guzzetti S, Botta M, Pieri E, Mangoni A. Cerebral complications of coronary by-pass surgery. A prospective study. <i>Acta neurologica Scandinavica</i> . 1988;77:158-163                                                                                                                                                                                                            | inappropriate data |
| Chakravarthy M, Manjunath V, Jawali V, Patil T, Jayaprakash K, Kalligudd P, Prabhakumar D, Kolar S, Manohar M, Basavaraj G, et al. Neurocognitive behaviour changes in patients undergoing off pump coronary artery bypass surgery- a prospective observational study. <i>Journal of Anaesthesiology Clinical Pharmacology</i> . 2008;24:49-52                                                                       | inappropriate data |
| Chandarana PC, Cooper AJ, Goldbach MM, Coles JC, Vesely MA. Perceptual and cognitive deficit following coronary artery bypass surgery. <i>Stress Medicine</i> . 1988;4:163-171                                                                                                                                                                                                                                       | inappropriate data |
| Chaudhury S, Sharma S, Pawar AA, Kumar BK, Srivastava K, Sudarsanan S, Singh D. Psychological correlates of outcome after coronary artery bypass graft. <i>Medical Journal Armed Forces India</i> . 2006;62:220-223                                                                                                                                                                                                  | inappropriate data |
| Cheng DC, Karski J, Peniston C, Asokumar B, Raveendran G, Carroll J, Nierenberg H, Roger S, Mickle D, Tong J, et al. Morbidity outcome in early versus conventional tracheal extubation after coronary artery bypass grafting: A prospective randomized controlled trial. <i>The Journal of thoracic and cardiovascular surgery</i> . 1996;112:755-764                                                               | inappropriate data |

|                                                                                                                                                                                                                                                                                                                                         |                    |
|-----------------------------------------------------------------------------------------------------------------------------------------------------------------------------------------------------------------------------------------------------------------------------------------------------------------------------------------|--------------------|
| Chernov VI, Efimova NY, Efimova IY, Akhmedov SD, Lishmanov YB. Short-term and long-term cognitive function and cerebral perfusion in off-pump and on-pump coronary artery bypass patients. <i>European journal of cardio-thoracic surgery : official journal of the European Association for Cardio-thoracic Surgery.</i> 2006;29:74-81 | inappropriate data |
| Chokron S, Helft G, Perez C. Effects of age and cardiovascular disease on selective attention. <i>Cardiovascular psychiatry and neurology.</i> 2013;2013:185385                                                                                                                                                                         | inappropriate data |
| Dabrowski W, Rzecki Z, Czajkowski M, Pilat J, Biernacka J, Kotlinska E, Pasternak K, Stazka K, Sztanke M, Sztanke K. Plasma matrix metalloproteinase 9 correlates with disorders of brain magnesium homeostasis in patients undergoing coronary artery bypass surgery. <i>Magnesium research.</i> 2010;23:169-179                       | inappropriate data |
| de Baar M, Diephuis JC, Moons KGM, Holtkamp J, Hijman R, Kalkman CJ. The effect of zero-balanced ultrafiltration during cardiopulmonary bypass on s100b release and cognitive function. <i>Perfusion.</i> 2003;18:9-14                                                                                                                  | inappropriate data |
| de Tournay-Jette E, Dupuis G, Denault A, Cartier R, Bherer L. The benefits of cognitive training after a coronary artery bypass graft surgery. <i>Journal of Behavioral Medicine.</i> 2012;35:557-568                                                                                                                                   | inappropriate data |
| Djaiani G, Ali M, Borger MA, Woo A, Carroll J, Feindel C, Fedorko L, Karski J, Rakowski H. Epi-aortic scanning modifies planned intraoperative surgical management but not cerebral embolic load during coronary artery bypass surgery. <i>Anesthesia and analgesia.</i> 2008;106:1611-1618                                             | inappropriate data |
| Djaiani G, Fedorko L, Borger MA, Green R, Carroll J, Marcon M, Karski J. Continuous-flow cell saver reduces cognitive decline in elderly patients after coronary bypass surgery. <i>Circulation.</i> 2007;116:1888-1895                                                                                                                 | inappropriate data |
| Djaiani G, Katznelson R, Fedorko L, Rao V, Green R, Carroll J, Katski J. Early benefit of preserved cognitive function is not sustained at one-year after cardiac surgery: A longitudinal follow-up of the randomized controlled trial. <i>Canadian journal of anaesthesia = Journal canadien d'anesthesie.</i> 2012;59:449-455         | inappropriate data |
| Dowd NP, Karski JM, Cheng DC, Gajula S, Seneviratne P, Munro JA, Fiducia D. Fast-track cardiac anaesthesia in the elderly: Effect of two different anaesthetic techniques on mental recovery. <i>British Journal of Anaesthesia.</i> 2001;86:68-76                                                                                      | inappropriate data |
| Dumas A, Dupuis GH, Searle N, Cartier R. Early versus late extubation after coronary artery bypass grafting: Effects on cognitive function. <i>Journal of cardiothoracic and vascular anesthesia.</i> 1999;13:130-135                                                                                                                   | inappropriate data |
| Ebert AD, Walzer TA, Huth C, Herrmann M. Early neurobehavioral disorders after cardiac surgery: A comparative analysis of coronary artery bypass graft surgery and valve replacement. <i>Journal of cardiothoracic and vascular anesthesia.</i> 2001;15:15-19                                                                           | inappropriate data |
| Ellis RJ, Wisniewski A, Potts R, Calhoun C, Loucks P, Wells MR. Reduction of flow rate and arterial pressure at moderate hypothermia does not result in cerebral dysfunction. <i>Journal of Thoracic and Cardiovascular Surgery.</i> 1980;79:173-180                                                                                    | inappropriate data |
| Engelhardt W, Dierks T, Pause M, Hartung E, Haaland K, Temkin N, Randahl G, Dikmen S. Early cerebral functional outcome after coronary artery bypass surgery using different acid-base management during hypothermic cardiopulmonary bypass. <i>Acta anaesthesiologica Scandinavica.</i> 1996;40:457-465                                | inappropriate data |
| Ernest C, Worcester M, Tatoulis J, Elliott P, Murphy B, Higgins R, Grande M, Goble A. Neurocognitive outcomes in off-pump versus on-pump bypass surgery: A randomized controlled trial. <i>Ann Thorac Surg.</i> 2006;81:2105-2114                                                                                                       | inappropriate data |
| Eryomina OV, Petrova MM, Prokopenko SV, Mozheyko EY, Kaskaeva DS, Gavrilyuk OA. The effectiveness of the correction of cognitive impairment using computer-based stimulation programs for patients with coronary heart disease after coronary bypass surgery. <i>Journal of the Neurological Sciences.</i> 2015;358:188-192             | inappropriate data |
| Evered L, Scott DA, Silbert B, Maruff P. Postoperative cognitive dysfunction is independent of type of surgery and anesthetic. <i>Anesthesia and analgesia.</i> 2011;112:1179-1185                                                                                                                                                      | inappropriate data |
| Evered LA, Silbert BS, Scott DA, Maruff P, Ames D. Prevalence of dementia 7.5 years after coronary artery bypass graft surgery. <i>Anesthesiology.</i> 2016;125:62-71                                                                                                                                                                   | inappropriate data |
| Evered LA, Silbert BS, Scott DA, Maruff P, Laughton KM, Volitakis I, Cowie T, Cherny RA, Masters CL, Li QX. Plasma amyloid beta42 and amyloid beta40 levels are associated with early cognitive dysfunction after cardiac surgery. <i>Annals of Thoracic Surgery.</i> 2009;88:1426-1432                                                 | inappropriate data |

|                                                                                                                                                                                                                                                                                                                                                                   |                    |
|-------------------------------------------------------------------------------------------------------------------------------------------------------------------------------------------------------------------------------------------------------------------------------------------------------------------------------------------------------------------|--------------------|
| Evered LA, Silbert BS, Scott DA. Postoperative cognitive dysfunction and aortic atheroma. <i>The Annals of thoracic surgery</i> . 2010;89:1091-1097                                                                                                                                                                                                               | inappropriate data |
| Farhoudi M, Mehrvar K, Afrasiabi A, Parvizi R, Khalili AA, Nasiri B, Hashemzadeh K, Ghabili K. Neurocognitive impairment after off-pump and on-pump coronary artery bypass graft surgery - an Iranian experience. <i>Neuropsychiatric disease and treatment</i> . 2010;6:775-778                                                                                  | inappropriate data |
| Farsak B, Gunaydin S, Yorgancioglu C, Zorlutuna Y. Elevated levels of s-100beta correlate with neurocognitive outcome after cardiac surgery. <i>The Journal of cardiovascular surgery</i> . 2003;44:31-35                                                                                                                                                         | inappropriate data |
| Fitch JCK, Rollins S, Matis L, Alford B, Aranki S, Collard CD, Dewar M, Eleftheriades J, Hines R, Kopf G, et al. Pharmacology and biological efficacy of a recombinant, humanized, single-chain antibody c5 complement inhibitor in patients undergoing coronary artery bypass graft surgery with cardiopulmonary bypass. <i>Circulation</i> . 1999;100:2499-2506 | inappropriate data |
| Folks DG, Freeman AM, 3rd, Sokol RS, Govier AV, Reves JG, Baker DM. Cognitive dysfunction after coronary artery bypass surgery: A case-controlled study. <i>Southern medical journal</i> . 1988;81:202-206                                                                                                                                                        | inappropriate data |
| Formica F, Tata G, Singh G, Mariani S, D'Alessandro S, Messina LA, Sangalli F, Paolini G. Incidence of perioperative stroke in clampless aortic anastomosis during off-pump coronary artery bypass grafting. <i>Heart &amp; Vessels</i> . 2018;33:595-604                                                                                                         | inappropriate data |
| Forrest CM, Mackay GM, Oxford L, Millar K, Darlington LG, Higgins MJ, Stone TW. Kynurenine metabolism predicts cognitive function in patients following cardiac bypass and thoracic surgery. <i>Journal of Neurochemistry</i> . 2011;119:136-152                                                                                                                  | inappropriate data |
| Gasparovic H, Borojevic M, Malojcic B, Gasparovic K, Biocina B. Single aortic clamping in coronary artery bypass surgery reduces cerebral embolism and improves neurocognitive outcomes. <i>Vascular medicine (London, England)</i> . 2013;18:275-281                                                                                                             | inappropriate data |
| Gasparovic H, Kopjar T, Rados M, Anticevic A, Rados M, Malojcic B, Ivancan V, Fabijanic T, Cikes M, Milicic D, et al. Impact of remote ischemic preconditioning preceding coronary artery bypass grafting on inducing neuroprotection. <i>Journal of Thoracic &amp; Cardiovascular Surgery</i> . 2018;06:06                                                       | inappropriate data |
| Gerriets T, Schwarz N, Bachmann G, Kaps M, Kloevekom WP, Sammer G, Tschernatsch M, Nottbohm R, Blaes F, Schonburg M. Evaluation of methods to predict early long-term neurobehavioral outcome after coronary artery bypass grafting. <i>American Journal of Cardiology</i> . 2010;105:1095-1101                                                                   | inappropriate data |
| Gold J, Charlson M, Williams-Russo P, Szatrowski T, Peterson J, Pirraglia P, Hartman G, Yao F, Hollenberg J, Barbut D. Improvement of outcomes after coronary artery bypass. A randomized trial comparing intraoperative high versus low mean arterial pressure. <i>J Thorac Cardiovasc Surg</i> . 1995;110:1302-1311; discussion 1311                            | inappropriate data |
| Goto T, Baba T, Honma K, Shibata Y, Arai Y, Uozumi H, Okuda T. Magnetic resonance imaging findings and postoperative neurologic dysfunction in elderly patients undergoing coronary artery bypass grafting. <i>The Annals of thoracic surgery</i> . 2001;72:137-142                                                                                               | inappropriate data |
| Goto T, Baba T, Ito A, Maekawa K, Koshiji T. Gender differences in stroke risk among the elderly after coronary artery surgery. <i>Anesthesia and analgesia</i> . 2007;104:1016-contents                                                                                                                                                                          | inappropriate data |
| Goto T, Baba T, Matsuyama K, Honma K, Ura M, Koshiji T. Aortic atherosclerosis and postoperative neurological dysfunction in elderly coronary surgical patients. <i>The Annals of thoracic surgery</i> . 2003;75:1912-1918                                                                                                                                        | inappropriate data |
| Griffin S, Klinger L, Newman S, Hothersall J, McLean P, Harrison M, Sturridge M, Treasure T. The effect of substrate load and blood glucose management on cerebral dysfunction following cardiopulmonary bypass. <i>Vascular Surgery</i> . 1992;26:656-664                                                                                                        | inappropriate data |
| Grigore AM, Grocott HP, Mathew JP, Phillips-Bute B, Stanley TO, Butler A, Reves JG, Blumenthal JA, Newman MF, Clements FM, et al. The rewarming rate and increased peak temperature alter neurocognitive outcome after cardiac surgery. <i>Anesthesia and analgesia</i> . 2002;94:4-10                                                                            | inappropriate data |
| Grigore AM, Mathew J, Grocott HP, Reves JG, Blumenthal JA, White WD, Smith PK, Jones RH, Kirchner JL, Mark DB, et al. Prospective randomized trial of normothermic versus hypothermic cardiopulmonary bypass on cognitive function after coronary artery bypass graft surgery. <i>Anesthesiology</i> . 2001;95:1110-1119                                          | inappropriate data |
| Grimm M, Czerny M, Baumer H, Kilo J, Madl C, Kramer L, Rajek A, Wolner E. Normothermic cardiopulmonary bypass is beneficial for cognitive brain function after coronary artery bypass grafting - a prospective randomized trial. <i>European Journal of Cardio-Thoracic Surgery</i> . 2000;18:270-275                                                             | inappropriate data |

|                                                                                                                                                                                                                                                                                                                                                                                                                                      |                    |
|--------------------------------------------------------------------------------------------------------------------------------------------------------------------------------------------------------------------------------------------------------------------------------------------------------------------------------------------------------------------------------------------------------------------------------------|--------------------|
| Grocott HP, Mackensen GB, Grigore AM, Mathew J, Reves JG, Phillips-Bute B, Smith PK, Newman MF. Postoperative hyperthermia is associated with cognitive dysfunction after coronary artery bypass graft surgery. <i>Stroke</i> . 2002;33:537-541                                                                                                                                                                                      | inappropriate data |
| Gunaydin B, Babacan A. Cerebral hypoperfusion after cardiac surgery and anesthetic strategies: A comparative study with high dose fentanyl and barbiturate anesthesia. <i>Annals of thoracic and cardiovascular surgery : official journal of the Association of Thoracic and Cardiovascular Surgeons of Asia</i> . 1998;4:12-17                                                                                                     | inappropriate data |
| Haljan G, Maitland A, Buchan A, Arora RC, King M, Haigh J, Culleton B, Faris P, Zygun D. The erythropoietin neuroprotective effect: Assessment in cabg surgery (tenpeaks): A randomized, double-blind, placebo controlled, proof-of-concept clinical trial. <i>Stroke</i> . 2009;40:2769-2775                                                                                                                                        | inappropriate data |
| Hall MW, Hopkins RO, Long JW, Mohammad SF, Solen KA. Hypothermia-induced platelet aggregation and cognitive decline in coronary artery bypass surgery: A pilot study. <i>Perfusion</i> . 2005;20:157-167                                                                                                                                                                                                                             | inappropriate data |
| Hammeke TA, Hastings JE. Neuropsychologic alterations after cardiac operation. <i>The Journal of thoracic and cardiovascular surgery</i> . 1988;96:326-331                                                                                                                                                                                                                                                                           | inappropriate data |
| Hammon J, Stump D, Butterworth J, Moody D, Rorie K, Deal D, Kincaid E, Oaks T, Kon N. Coronary artery bypass grafting with single cross-clamp results in fewer persistent neuropsychological deficits than multiple clamp or off-pump coronary artery bypass grafting. <i>Ann Thorac Surg</i> . 2007;84:1174-1178; discussion 1178                                                                                                   | inappropriate data |
| Hammon J, Stump D, Butterworth J, Moody D, Rorie K, Deal D, Kincaid E, Oaks T, Kon N. Single crossclamp improves 6-month cognitive outcome in high-risk coronary bypass patients: The effect of reduced aortic manipulation. <i>J Thorac Cardiovasc Surg</i> . 2006;131:114-121                                                                                                                                                      | inappropriate data |
| Harrison MJG, Schneidau A, Ho R, Smith PLC, Newman S, Treasure T. Cerebrovascular disease and functional outcome after coronary artery bypass surgery. <i>Stroke</i> . 1989;20:235-237                                                                                                                                                                                                                                               | inappropriate data |
| Hedges C. Sleep, memory, and learning in off-pump coronary artery bypass patients. <i>Research in nursing &amp; health</i> . 2005;28:462-473                                                                                                                                                                                                                                                                                         | inappropriate data |
| Hernandez F, Jr., Brown JR, Likosky DS, Clough RA, Hess AL, Roth RM, Ross CS, Whited CM, O'Connor GT, Klemperer JD. Neurocognitive outcomes of off-pump versus on-pump coronary artery bypass: A prospective randomized controlled trial. <i>The Annals of thoracic surgery</i> . 2007;84:1897-1903                                                                                                                                  | inappropriate data |
| Herrmann M, Ebert AD, Tober D, Hann J, Huth C. A contrastive analysis of release patterns of biochemical markers of brain damage after coronary artery bypass grafting and valve replacement and their association with the neurobehavioral outcome after cardiac surgery. <i>European journal of cardio-thoracic surgery : official journal of the European Association for Cardio-thoracic Surgery</i> . 1999;16:513-518           | inappropriate data |
| Heyer EJ, Adams DC, Delphin E, McMahon DJ, Steneck SD, Oz MC, Miehler RE, Rose EA. Cerebral dysfunction after coronary artery bypass grafting done with mild or moderate hypothermia. <i>Journal of Thoracic and Cardiovascular Surgery</i> . 1997;114:270-277                                                                                                                                                                       | inappropriate data |
| Heyer EJ, Lee KS, Manspeizer HE, Mongero L, Spanier TB, Caliste X, Esrig B, Smith C. Heparin-bonded cardiopulmonary bypass circuits reduce cognitive dysfunction. <i>Journal of cardiothoracic and vascular anesthesia</i> . 2002;16:37-42                                                                                                                                                                                           | inappropriate data |
| Hlatky MA, Bacon C, Boothroyd D, Mahanna E, Reves JG, Newman MF, Johnstone I, Winston C, Brooks MM, Rosen AD, et al. Cognitive function 5 years after randomization to coronary angioplasty or coronary artery bypass graft surgery. <i>Circulation</i> . 1997;96:II-15                                                                                                                                                              | inappropriate data |
| Ho PM, Arciniegas DB, Grigsby J, McCarthy M, Jr., McDonald GO, Moritz TE, Shroyer AL, Sethi GK, Henderson WG, London MJ, et al. Predictors of cognitive decline following coronary artery bypass graft surgery. <i>The Annals of thoracic surgery</i> . 2004;77:597-603                                                                                                                                                              | inappropriate data |
| Hofland J, Ouattara A, Fellahi JL, Gruenewald M, Hazebroucq J, Ecoffey C, Joseph P, Heringlake M, Steib A, Coburn M, et al. Effect of xenon anesthesia compared to sevoflurane and total intravenous anesthesia for coronary artery bypass graft surgery on postoperative cardiac troponin release an international, multicenter, phase 3, single-blinded, randomized noninferiority trial. <i>Anesthesiology</i> . 2017;127:918-933 | inappropriate data |
| Hudetz JA, Gandhi SD, Iqbal Z, Patterson KM, Pagel PS. Elevated postoperative inflammatory biomarkers are associated with short- and medium-term cognitive dysfunction after coronary artery surgery. <i>Journal of Anesthesia</i> . 2011;25:1-9                                                                                                                                                                                     | inappropriate data |

|                                                                                                                                                                                                                                                                                                                                                                                                             |                    |
|-------------------------------------------------------------------------------------------------------------------------------------------------------------------------------------------------------------------------------------------------------------------------------------------------------------------------------------------------------------------------------------------------------------|--------------------|
| Hudetz JA, Iqbal Z, Gandhi SD, Patterson KM, Byrne AJ, Pagel PS. Postoperative delirium and short-term cognitive dysfunction occur more frequently in patients undergoing valve surgery with or without coronary artery bypass graft surgery compared with coronary artery bypass graft surgery alone: Results of a pilot study. <i>Journal of cardiothoracic and vascular anesthesia</i> . 2011;25:811-816 | inappropriate data |
| Ito A, Goto T, Maekawa K, Baba T, Mishima Y, Ushijima K. Postoperative neurological complications and risk factors for pre-existing silent brain infarction in elderly patients undergoing coronary artery bypass grafting. <i>Journal of Anesthesia</i> . 2012;26:405-411                                                                                                                                  | inappropriate data |
| Jensen BO, Hughes P, Rasmussen LS, Pedersen PU, Steinbruchel DA. Cognitive outcomes in elderly high-risk patients after off-pump versus conventional coronary artery bypass grafting: A randomized trial. <i>Circulation</i> . 2006;113:2790-2795                                                                                                                                                           | inappropriate data |
| Jensen BO, Rasmussen LS, Steinbruchel DA. Cognitive outcomes in elderly high-risk patients 1 year after off-pump versus on-pump coronary artery bypass grafting. A randomized trial. <i>European journal of cardio-thoracic surgery : official journal of the European Association for Cardio-thoracic Surgery</i> . 2008;34:1016-1021                                                                      | inappropriate data |
| Jonsson H, Johnsson P, Ailing C, Backstrom M, Bergh C, Blomquist S. S100beta after coronary artery surgery: Release pattern, source of contamination, and relation to neuropsychological outcome. <i>Annals of Thoracic Surgery</i> . 1999;68:2202-2208                                                                                                                                                     | inappropriate data |
| Jonsson H, Johnsson P, Backstrom M, Ailing C, Dautovic-Bergh C, Blomquist S. Controversial significance of early s100b levels after cardiac surgery. <i>BMC neurology</i> . 2004;4:24                                                                                                                                                                                                                       | inappropriate data |
| Joung K-W, Rhim J-H, Chin J-H, Kim W-J, Choi D-K, Lee E-H, Hahm K-D, Sim J-Y, Choi I-C. Effect of remote ischemic preconditioning on cognitive function after off-pump coronary artery bypass graft: A pilot study. <i>Korean Journal of Anesthesiology</i> . 2013;65:418-424                                                                                                                               | inappropriate data |
| Kadoi Y, Saito S, Fujita N, Mizutani A. Effects of balloon-induced pulsatile perfusion on postoperative short- and long-term cognitive dysfunction in diabetic patients with impaired cerebrovascular carbon dioxide reactivity. <i>Journal of cardiothoracic and vascular anesthesia</i> . 2013;27:238-244                                                                                                 | inappropriate data |
| Kanbak M, Saricaoglu F, Avci A, Ocal T, Koray Z, Aypar U. Propofol offers no advantage over isoflurane anesthesia for cerebral protection during cardiopulmonary bypass: A preliminary study of s-100beta protein levels. <i>Canadian journal of anaesthesia = Journal canadien d'anesthesie</i> . 2004;51:712-717                                                                                          | inappropriate data |
| Kaukinen L, Porkkala H, Kaukinen S, Pehkonen E, Karkela J, Aaran RK, Tarkka M. Release of brain-specific creatine kinase and neuron-specific enolase into cerebrospinal fluid after hypothermic and normothermic cardiopulmonary bypass in coronary artery surgery. <i>Acta anaesthesiologica Scandinavica</i> . 2000;44:361-368                                                                            | inappropriate data |
| Kazmierski J, Banys A, Latek J, Bourke J, Jaszewski R. Cortisol levels and neuropsychiatric diagnosis as markers of postoperative delirium: A prospective cohort study. <i>Critical Care (London, England)</i> . 2013;17:R38                                                                                                                                                                                | inappropriate data |
| Keizer AMA, Hijman R, Kalkman CJ, Kahn RS, Van Dijk D. The incidence of cognitive decline after (not) undergoing coronary artery bypass grafting: The impact of a controlled definition. <i>Acta anaesthesiologica Scandinavica</i> . 2005;49:1232-1235                                                                                                                                                     | inappropriate data |
| Kempfert J, Opfermann UT, Richter M, Bossert T, Mohr FW, Gummert JF. Twelve-month patency with the pas-port proximal connector device: A single center prospective randomized trial. <i>The Annals of thoracic surgery</i> . 2008;85:1579-1584                                                                                                                                                              | inappropriate data |
| Kinnunen EM, De Feo M, Reichart D, Tauriainen T, Gatti G, Onorati F, Maschietto L, Bancone C, Fiorentino F, Chocron S, et al. Incidence and prognostic impact of bleeding and transfusion after coronary surgery in low-risk patients. <i>Transfusion</i> . 2017;57:178-186                                                                                                                                 | inappropriate data |
| Kneebone AC, Andrew MJ, Baker RA, Knight JL. Neuropsychologic changes after coronary artery bypass grafting: Use of reliable change indices. <i>The Annals of thoracic surgery</i> . 1998;65:1320-1325                                                                                                                                                                                                      | inappropriate data |
| Kneebone AC, Luszcz MA, Baker RA, Knight JL. A syndromal analysis of neuropsychological outcome following coronary artery bypass graft surgery. <i>Journal of neurology, neurosurgery, and psychiatry</i> . 2005;76:1121-1127                                                                                                                                                                               | inappropriate data |
| Knipp SC, Matatko N, Wilhelm H, Schlamann M, Thielmann M, Losch C, Diener HC, Jakob H. Cognitive outcomes three years after coronary artery bypass surgery: Relation to diffusion-weighted magnetic resonance imaging. <i>The Annals of thoracic surgery</i> . 2008;85:872-879                                                                                                                              | inappropriate data |

|                                                                                                                                                                                                                                                                                                                                               |                    |
|-----------------------------------------------------------------------------------------------------------------------------------------------------------------------------------------------------------------------------------------------------------------------------------------------------------------------------------------------|--------------------|
| Knipp SC, Weimar C, Schlamann M, Schweter S, Wendt D, Thielmann M, Benedik J, Jakob H. Early and long-term cognitive outcome after conventional cardiac valve surgery. <i>Interactive Cardiovascular &amp; Thoracic Surgery</i> . 2017;24:534-540                                                                                             | inappropriate data |
| Kohn A. Magnetic resonance imaging registration and quantitation of the brain before and after coronary artery bypass graft surgery. <i>The Annals of thoracic surgery</i> . 2002;73:S363-365                                                                                                                                                 | inappropriate data |
| Kok WF, Van Harten AE, Koene BMJA, Mariani MA, Koerts J, Tucha O, Absalom AR, Scheeren TWL. A pilot study of cerebral tissue oxygenation and postoperative cognitive dysfunction among patients undergoing coronary artery bypass grafting randomised to surgery with or without cardiopulmonary bypass. <i>Anaesthesia</i> . 2014;69:613-622 | inappropriate data |
| Kong RS, Butterworth J, Aveling W, Stump DA, Harrison MJG, Hammon J, Stygall J, Rorie KD, Newman SP. Clinical trial of the neuroprotectant clomethiazole in coronary artery bypass graft surgery: A randomized controlled trial. <i>Anesthesiology</i> . 2002;97:585-591                                                                      | inappropriate data |
| Kozora E, Kongs S, Collins J, Hattler B, Baltz J, Hampton M, Grover F, Novitzky D, Shroyer A. Cognitive outcomes after on- versus off-pump coronary artery bypass surgery. <i>Ann Thorac Surg</i> . 2010;90:1134-1141                                                                                                                         | inappropriate data |
| Kumpaitiene B, Svagzdiene M, Drigotiene I, Sirvinskas E, Sepetiene R, Zakelis R, Benetis R. Correlation among decreased regional cerebral oxygen saturation, blood levels of brain injury biomarkers, and cognitive disorder. <i>Journal of International Medical Research</i> . 2018;46:3621-3629                                            | inappropriate data |
| Kuzma E, Airdrie J, Littlejohns TJ, Lourida I, Thompson-Coon J, Lang IA, Scrobotovici M, Thacker EL, Fitzpatrick A, Kuller LH, et al. Coronary artery bypass graft surgery and dementia risk in the cardiovascular health study. <i>Alzheimer disease and associated disorders</i> . 2017:no pagination                                       | inappropriate data |
| Lancot KL, O'Regan J, Schwartz Y, Swardfager W, Saleem M, Oh PI, Herrmann N. Assessing cognitive effects of anticholinergic medications in patients with coronary artery disease. <i>Psychosomatics</i> . 2014;55:61-68                                                                                                                       | inappropriate data |
| LaPier TK. Functional status of patients during subacute recovery from coronary artery bypass surgery. <i>Heart &amp; lung : the journal of critical care</i> . 2007;36:114-124                                                                                                                                                               | inappropriate data |
| Lazibat I, Sutlic Z, Brkic K, Nevajda B, Sikic J, Mestrovic AH. Predictors of short-term neurocognitive outcome following coronary revascularisation (cabg) depending on the use of cardiopulmonary bypass. <i>Collegium Antropologicum</i> . 2012;36:827-833                                                                                 | inappropriate data |
| Leacche M, Carrier M, Bouchard D, Pellerin M, Perrault LP, Paga P, Hebert Y, Cartier R. Improving neurologic outcome in off-pump surgery: The "no touch" technique. <i>The heart surgery forum</i> . 2003;6:169-175                                                                                                                           | inappropriate data |
| Lee JD, Lee SJ, Tsushima WT, Yamauchi H, Lau WT, Popper J, Stein A, Johnson D, Lee D, Petrovitch H, et al. Benefits of off-pump bypass on neurologic and clinical morbidity: A prospective randomized trial. <i>The Annals of thoracic surgery</i> . 2003;76:18-16                                                                            | inappropriate data |
| Lewis M, Maruff P, Silbert B, Evered L, Scott D. The sensitivity and specificity of three common statistical rules for the classification of post-operative cognitive dysfunction following coronary artery bypass graft surgery. <i>Acta Anaesthesiol Scand</i> . 2006;50:50-57                                                              | inappropriate data |
| Lewis MS, Maruff P, Silbert BS, Evered LA, Scott DA. Detection of postoperative cognitive decline after coronary artery bypass graft surgery is affected by the number of neuropsychological tests in the assessment battery. <i>The Annals of thoracic surgery</i> . 2006;81:2097-2104                                                       | inappropriate data |
| Lewis MS, Maruff P, Silbert BS, Evered LA, Scott DA. The influence of different error estimates in the detection of postoperative cognitive dysfunction using reliable change indices with correction for practice effects (doi:10.1016/j.Acn.2006.05.004). <i>Archives of Clinical Neuropsychology</i> . 2007;22:249-257                     | inappropriate data |
| Lund C, Hol PK, Lundblad R, Fosse E, Sundet K, Tennoe B, Brucher R, Russell D. Comparison of cerebral embolization during off-pump and on-pump coronary artery bypass surgery. <i>The Annals of thoracic surgery</i> . 2003;76:765-770                                                                                                        | inappropriate data |
| Lund C, Sundet K, Tennoe B, Hol PK, Rein KA, Fosse E, Russell D. Cerebral ischemic injury and cognitive impairment after off-pump and on-pump coronary artery bypass grafting surgery. <i>The Annals of thoracic surgery</i> . 2005;80:2126-2131                                                                                              | inappropriate data |
| Maekawa K, Goto T, Baba T, Yoshitake A, Katahira K, Yamamoto T. Impaired cognition preceding cardiac surgery is related to cerebral ischemic lesions. <i>Journal of Anesthesia</i> . 2011;25:330-336                                                                                                                                          | inappropriate data |

|                                                                                                                                                                                                                                                                                                                                                                           |                    |
|---------------------------------------------------------------------------------------------------------------------------------------------------------------------------------------------------------------------------------------------------------------------------------------------------------------------------------------------------------------------------|--------------------|
| Mahanna EP, Blumenthal JA, White WD, Croughwell ND, Clancy CP, Smith LR, Newman MF. Defining neuropsychological dysfunction after coronary artery bypass grafting. <i>The Annals of thoracic surgery</i> . 1996;61:1342-1347                                                                                                                                              | inappropriate data |
| Malheiros SMF, Brucki SMD, Gabbai AA, Bertolucci PHF, Juliano Y, Carvalho AC, Buffolo E. Neurological outcome in coronary artery surgery with and without cardiopulmonary bypass. <i>Acta neurologica Scandinavica</i> . 1995;92:256-260                                                                                                                                  | inappropriate data |
| Martens S, Dietrich M, Herzog C, Doss M, Schneider G, Moritz A, Wimmer-Greinecker G. Automatic connector devices for proximal anastomoses do not decrease embolic debris compared with conventional anastomoses in cabg. <i>European journal of cardio-thoracic surgery : official journal of the European Association for Cardio-thoracic Surgery</i> . 2004;25:993-1000 | inappropriate data |
| Mathew JP, Grocott HP, McCurdy JR, Ti LK, Davis RD, Laskowitz DT, Podgoreanu MV, Swaminathan M, Lynch J, Stafford-Smith M, et al. Preoperative statin therapy does not reduce cognitive dysfunction after cardiopulmonary bypass. <i>Journal of cardiothoracic and vascular anesthesia</i> . 2005;19:294-299                                                              | inappropriate data |
| Mathew JP, Grocott HP, Phillips-Bute B, Stafford-Smith M, Laskowitz DT, Rossignol D, Blumenthal JA, Newman MF, Bennett MJ, Booth JV, et al. Lower endotoxin immunity predicts increased cognitive dysfunction in elderly patients after cardiac surgery. <i>Stroke</i> . 2003;34:508-513                                                                                  | inappropriate data |
| Mattlar CE, Engblom E, Vesala P, Vanttinen E, Knuts LR. The proportion of patients with cognitive impairment after coronary artery bypass surgery: An 8-month follow-up study. <i>Psychotherapy and psychosomatics</i> . 1991;55:145-150                                                                                                                                  | inappropriate data |
| McKenzie LH, Simpson J, Stewart M. The impact of depression on activities of daily living skills in individuals who have undergone coronary artery bypass graft surgery. <i>Psychology, health &amp; medicine</i> . 2009;14:641-653                                                                                                                                       | inappropriate data |
| McKhann GM, Borowicz LM, Goldsborough MA, Enger C, Selnes OA. Depression and cognitive decline after coronary artery bypass grafting. <i>Lancet (London, England)</i> . 1997;349:1282-1284                                                                                                                                                                                | inappropriate data |
| McKhann GM, Goldsborough MA, Borowicz Jr LM, Selnes OA, Mellits ED, Enger C, Quaskey SA, Baumgartner WA, Cameron DE, Stuart RS, et al. Cognitive outcome after coronary artery bypass: A one-year prospective study. <i>Annals of Thoracic Surgery</i> . 1997;63:510-515                                                                                                  | inappropriate data |
| McKhann GM, Grega MA, Borowicz Jr LM, Bailey MM, Barry SJE, Zeger SL, Baumgartner WA, Selnes OA. Is there cognitive decline 1 year after cabg? Comparison with surgical and nonsurgical controls. <i>Neurology</i> . 2005;65:991-999                                                                                                                                      | inappropriate data |
| Molstrom S, Nielsen TH, Andersen C, Nordstrom CH, Toft P. Bedside monitoring of cerebral energy state during cardiac surgery-a novel approach utilizing intravenous microdialysis. <i>Journal of cardiothoracic and vascular anesthesia</i> . 2016:no pagination                                                                                                          | inappropriate data |
| Mongero LB, Beck JR, Manspeizer HE, Heyer EJ, Lee K, Spanier TA, Smith CR. Cardiac surgical patients exposed to heparin-bonded circuits develop less postoperative cerebral dysfunction than patients exposed to non-heparin-bonded circuits. <i>Perfusion</i> . 2001;16:107-111                                                                                          | inappropriate data |
| Motallebzadeh R, Bland JM, Markus HS, Kaski JC, Jahangiri M. Neurocognitive function and cerebral emboli: Randomized study of on-pump versus off-pump coronary artery bypass surgery. <i>The Annals of thoracic surgery</i> . 2007;83:475-482                                                                                                                             | inappropriate data |
| Mullges W, Babin-Ebell J, Reents W, Toyka KV. Cognitive performance after coronary artery bypass grafting: A follow-up study. <i>Neurology</i> . 2002;59:741-743                                                                                                                                                                                                          | inappropriate data |
| Murkin J, Martzke J, Buchan A, Bentley C, Wong C. A randomized study of the influence of perfusion technique and ph management strategy in 316 patients undergoing coronary artery bypass surgery. Ii. Neurologic and cognitive outcomes. <i>J Thorac Cardiovasc Surg</i> . 1995;110:349-362                                                                              | inappropriate data |
| Musumeci F, Feccia M, MacCarthy PA, Ellis GR, Mamma L, Brinn F, Penny WJ. Prospective randomized trial of single clamp technique versus intermittent ischaemic arrest: Myocardial and neurological outcome. <i>European journal of cardio-thoracic surgery : official journal of the European Association for Cardio-thoracic Surgery</i> . 1998;13:702-709               | inappropriate data |
| Nathan HJ, Rodriguez R, Wozny D, Dupuis J-Y, Rubens FD, Bryson GL, Wells G. Neuroprotective effect of mild hypothermia in patients undergoing coronary artery surgery with cardiopulmonary bypass: Five-year follow-up of a randomized trial. <i>The Journal of thoracic and cardiovascular surgery</i> . 2007;133:1206-1211                                              | inappropriate data |
| Newman MF, Kirchner JL, Phillips-Bute B, Gaver V, Grocott H, Jones RH, Mark DB, Reves JG, Blumenthal JA. Longitudinal assessment of neurocognitive function after coronary-artery bypass surgery. <i>The New England journal of medicine</i> . 2001;344:395-402                                                                                                           | inappropriate data |

|                                                                                                                                                                                                                                                                                                                                               |                    |
|-----------------------------------------------------------------------------------------------------------------------------------------------------------------------------------------------------------------------------------------------------------------------------------------------------------------------------------------------|--------------------|
| Norkiene I, Samalavicius R, Misiuriene I, Paulauskiene K, Budrys V, Ivaskevicius J. Incidence and risk factors for early postoperative cognitive decline after coronary artery bypass grafting. <i>Medicina (Kaunas, Lithuania)</i> . 2010;46:460-464                                                                                         | inappropriate data |
| Notzold A, Michel K, Khattab AA, Sievers HH, Huppe M. Diabetes mellitus increases adverse neurocognitive outcome after coronary artery bypass grafting surgery. <i>The Thoracic and cardiovascular surgeon</i> . 2006;54:307-312                                                                                                              | inappropriate data |
| Oelofsen N, Fullard JPP, Foxcroft CD. Health-related quality of life after coronary revascularisation surgery. <i>South African Journal of Psychology</i> . 1998;28:85-91                                                                                                                                                                     | inappropriate data |
| O'Neal JB, Billings FTt, Liu X, Shotwell MS, Liang Y, Shah AS, Ehrenfeld JM, Wanderer JP, Shaw AD. Risk factors for delirium after cardiac surgery: A historical cohort study outlining the influence of cardiopulmonary bypass. <i>Canadian Journal of Anaesthesia</i> . 2017;64:1129-1137                                                   | inappropriate data |
| Owens SG, Agnew J, Curbow B, Selnes O, Fitzgerald S, Ades AA-RBBBEGHHHHHHMMMMNP-BRRRSSSSST. The association of neurocognitive decline and other variables with return to work, hobbies, and activities of daily living after coronary artery bypass graft surgery. <i>Physical &amp; Occupational Therapy in Geriatrics</i> . 2010;28:348-359 | inappropriate data |
| Ozturk S, Sacar M, Baltalarli A, Ozturk I. Effect of the type of cardiopulmonary bypass pump flow on postoperative cognitive function in patients undergoing isolated coronary artery surgery. <i>Anatolian Journal of Cardiology</i> . 2016;16:875-880                                                                                       | inappropriate data |
| Palotasa A, Reis HJ, Bogats G, Babik B, Racsmay M, Engvau L, Kecskemeti E, Juhasz A, Vieira LB, Teixeira AL, et al. Coronary artery bypass surgery provokes alzheimer's disease-like changes in the cerebrospinal fluid. <i>Journal of Alzheimer's Disease</i> . 2010;21:1153-1164                                                            | inappropriate data |
| Panagopoulou E, Maes S, Tyrodimos E, Benos A. Symptoms of traumatic stress after coronary artery bypass grafting. <i>International journal of behavioral medicine</i> . 2008;15:227-231                                                                                                                                                       | inappropriate data |
| Panday GFV, Fischer S, Bauer A, Metz D, Schubel J, El Shouki N, Eberle T, Hausmann H. Minimal extracorporeal circulation and off-pump compared to conventional cardiopulmonary bypass in coronary surgery. <i>Interactive cardiovascular and thoracic surgery</i> . 2009;9:832-836                                                            | inappropriate data |
| Paolin A, Michielon P, Betetto M, Sartori G, Valfre C, Rodriguez G, Murkin JM. Lower perfusion pressure during hypothermic cardiopulmonary bypass is associated with decreased cerebral blood flow and impaired memory performance 6 months postoperatively. <i>The heart surgery forum</i> . 2010;13:E7-12                                   | inappropriate data |
| Patel RL, Turtle MR, Chambers DJ, James DN, Newman S, Venn GE. Alpha-stat acid-base regulation during cardiopulmonary bypass improves neuropsychologic outcome in patients undergoing coronary artery bypass grafting. <i>The Journal of thoracic and cardiovascular surgery</i> . 1996;111:1267-1279                                         | inappropriate data |
| Patel RL, Turtle MR, Chambers DJ, Newman S, Venn GE. Hyperperfusion and cerebral dysfunction. Effect of differing acid-base management during cardiopulmonary bypass. <i>European journal of cardio-thoracic surgery : official journal of the European Association for Cardio-thoracic Surgery</i> . 1993;7:457-464                          | inappropriate data |
| Peterson JC, Pirraglia PA, Wells MT, Charlson ME. Attrition in longitudinal randomized controlled trials: Home visits make a difference. <i>BMC Medical Research Methodology</i> . 2012;12:178                                                                                                                                                | inappropriate data |
| Petrovitch H, White L, Masaki KH, Ross GW, Abbott RD, Rodriguez BL, Lu G, Burchfiel CM, Blanchette PL, Curb JD. Influence of myocardial infarction, coronary artery bypass surgery, and stroke on cognitive impairment in late life. <i>The American journal of cardiology</i> . 1998;81:1017-1021                                            | inappropriate data |
| Phillips-Bute B, Mathew JP, Blumenthal JA, Grocott HP, Laskowitz DT, Jones RH, Mark DB, Newman MF. Association of neurocognitive function and quality of life 1 year after coronary artery bypass graft (cabg) surgery. <i>Psychosomatic medicine</i> . 2006;68:369-375                                                                       | inappropriate data |
| Potter GG, Plassman BL, Helms MJ, Steffens DC, Welsh-Bohmer KA. Age effects of coronary artery bypass graft on cognitive status change among elderly male twins. <i>Neurology</i> . 2004;63:2245-2249                                                                                                                                         | inappropriate data |
| Puskas F, Grocott HP, White WD, Mathew JP, Newman MF, Bar-Yosef S. Intraoperative hyperglycemia and cognitive decline after cabg. <i>The Annals of thoracic surgery</i> . 2007;84:1467-1473                                                                                                                                                   | inappropriate data |
| Puskas JD, Stringer A, Hwang SN, Hatfield B, Smith AS, Kilgo PD, Williams WH. Neurocognitive and neuroanatomic changes after off-pump versus on-pump coronary artery bypass grafting: Long-term follow-up of a randomized trial. <i>The Journal of thoracic and cardiovascular surgery</i> . 2011;141:1116-1127                               | inappropriate data |



|                                                                                                                                                                                                                                                                                                                                                     |                    |
|-----------------------------------------------------------------------------------------------------------------------------------------------------------------------------------------------------------------------------------------------------------------------------------------------------------------------------------------------------|--------------------|
| Rasmussen LS, Christiansen M, Eliassen K, Sander-Jensen K, Moller JT. Biochemical markers for brain damage after cardiac surgery - time profile and correlation with cognitive dysfunction. <i>Acta anaesthesiologica Scandinavica</i> . 2002;46:547-551                                                                                            | inappropriate data |
| Rasmussen LS, Christiansen M, Hansen PB, Moller JT. Do blood levels of neuron-specific enolase and s-100 protein reflect cognitive dysfunction after coronary artery bypass? <i>Acta anaesthesiologica Scandinavica</i> . 1999;43:495-500                                                                                                           | inappropriate data |
| Rasmussen LS, Sperling B, Abildstrom HH, Moller JT. Neuron loss after coronary artery bypass detected by spect estimation of benzodiazepine receptors. <i>The Annals of thoracic surgery</i> . 2002;74:1576-1580                                                                                                                                    | inappropriate data |
| Raymond PD, Hinton-Bayre AD, Radel M, Ray MJ, Marsh NA. Assessment of statistical change criteria used to define significant change in neuropsychological test performance following cardiac surgery. <i>European journal of cardio-thoracic surgery : official journal of the European Association for Cardio-thoracic Surgery</i> . 2006;29:82-88 | inappropriate data |
| Raymond PD, Radel M, Ray MJ, Hinton-Bayre AD, Marsh NA. Investigation of factors relating to neuropsychological change following cardiac surgery. <i>Perfusion</i> . 2007;22:27-33                                                                                                                                                                  | inappropriate data |
| Reynolds JD, Amory DW, Grocott HP, White WD, Newman MF. Change in plasma glutamate concentration during cardiac surgery is a poor predictor of cognitive outcome. <i>Journal of cardiothoracic and vascular anesthesia</i> . 2002;16:431-436                                                                                                        | inappropriate data |
| Robson MJA, Alston RP, Deary IJ, Andrews PJD, Souter MJ. Jugular bulb oxyhemoglobin desaturation, s100beta, and neurologic and cognitive outcomes after coronary artery surgery. <i>Anesthesia and analgesia</i> . 2001;93:839-845                                                                                                                  | inappropriate data |
| Ropacki SA, Bert AA, Ropacki MT, Rogers BL, Stern RA. The influence of cognitive reserve on neuropsychological functioning following coronary artery bypass grafting (cabg). <i>Archives of clinical neuropsychology : the official journal of the National Academy of Neuropsychologists</i> . 2007;22:73-85                                       | inappropriate data |
| Rosengart TK, Sweet JJ, Finnin E, Wolfe P, Cashy J, Hahn E, Marymont J, Sanborn T. Stable cognition after coronary artery bypass grafting: Comparisons with percutaneous intervention and normal controls. <i>The Annals of thoracic surgery</i> . 2006;82:597-607                                                                                  | inappropriate data |
| Sader MA, Miller LA, Caine D, McCredie RJ, Corr MJ, Robertson M, Watson JDG, Celermajer DS. Neuropsychological and psychiatric outcomes following coronary surgery or angioplasty: A comparative study. <i>Heart, Lung &amp; Circulation</i> . 2002;11:95-101                                                                                       | inappropriate data |
| Salmon P, Stanford SC, Mikhail G, Zielinski S, Pepper JR. Hemodynamic and emotional responses to a psychological stressor after cardiac transplantation. <i>Psychosomatic medicine</i> . 2001;63:289-299                                                                                                                                            | inappropriate data |
| Santos FS, Velasco IT. Clinical features of elderly patients submitted to coronary artery bypass graft. <i>Gerontology</i> . 2005;51:234-241                                                                                                                                                                                                        | inappropriate data |
| Sauer AMC, Nathoe HM, Hendrikse J, Peelen LM, Regieli J, Veldhuijzen DS, Kalkman CJ, Grobbee DE, Doevendans PA, Van Dijk D. Cognitive outcomes 7.5 years after angioplasty compared with off-pump coronary bypass surgery. <i>Annals of Thoracic Surgery</i> . 2013;96:1294-1300                                                                    | inappropriate data |
| Schindler BA, Shook J, Schwartz GM. Beneficial effects of psychiatric intervention on recovery after coronary artery bypass graft surgery. <i>General Hospital Psychiatry</i> . 1989;11:358-364                                                                                                                                                     | inappropriate data |
| Schmitz C, Weinreich S, Schneider R, Schneider D, Speth I, Schulze-Rauschenbach C, Pohl C, Welz A. Off-pump versus on-pump coronary artery bypass: Can opcab reduce neurologic injury? <i>The heart surgery forum</i> . 2003;6:127-130                                                                                                              | inappropriate data |
| Sellman M, Holm L, Ivert T, Semb BKH. A randomized study of neuropsychological function in patients undergoing coronary bypass surgery. <i>Thoracic and Cardiovascular Surgeon</i> . 1993;41:349-354                                                                                                                                                | inappropriate data |
| Selnes OA, Goldsborough MA, Borowicz LM, Jr., Enger C, Quaskey SA, McKhann GM. Determinants of cognitive change after coronary artery bypass surgery: A multifactorial problem. <i>The Annals of thoracic surgery</i> . 1999;67:1669-1676                                                                                                           | inappropriate data |
| Semrau JS, Scott SH, Hamilton AG, Petsikas D, Payne DM, Bisleri G, Saha T, Boyd JG. The relationship between cerebral oxygen saturation and quantitative metrics of neurological function after coronary bypass surgery: A feasibility study. <i>Journal of Cardiovascular Surgery</i> . 2018;59:716-728                                            | inappropriate data |
| Sendelbach S, Lindquist R, Watanuki S, Savik K. Correlates of neurocognitive function of patients after off-pump coronary artery bypass surgery. <i>American journal of critical care : an official publication, American Association of Critical-Care Nurses</i> . 2006;15:290-298                                                                 | inappropriate data |

|                                                                                                                                                                                                                                                                                                                                                                      |                    |
|----------------------------------------------------------------------------------------------------------------------------------------------------------------------------------------------------------------------------------------------------------------------------------------------------------------------------------------------------------------------|--------------------|
| Shaaban-Ali M, Harmer M, Vaughan RS, Dunne JA, Latto IP, Haaverstad R, Kulatilake ENP, Butchart EG. Changes in serum s100beta protein and mini-mental state examination after cold (28degreec) and warm (34degreec) cardiopulmonary bypass using different blood gas strategies (alpha-stat and ph-stat). <i>Acta anaesthesiologica Scandinavica</i> . 2002;46:10-16 | inappropriate data |
| Shaw PJ, Bates D, Cartlidge NE, French JM, Heaviside D, Julian DG, Shaw DA. Long-term intellectual dysfunction following coronary artery bypass graft surgery: A six month follow-up study. <i>The Quarterly journal of medicine</i> . 1987;62:259-268                                                                                                               | inappropriate data |
| Shaw PJ, Bates D, Cartlidge NEF. Early intellectual dysfunction following coronary bypass surgery. <i>Quarterly Journal of Medicine</i> . 1986;58:59-68                                                                                                                                                                                                              | inappropriate data |
| Shaw PJ, Bates D, Cartlidge NEF. Neurologic and neuropsychological morbidity following major surgery: Comparison of coronary artery bypass and peripheral vascular surgery. <i>Stroke</i> . 1987;18:700-707                                                                                                                                                          | inappropriate data |
| Shi Z, Song J, Chang H, Zhang Y. Effects of preoperative psychological intervention on early postoperative cognitive dysfunction after off-pump coronary artery bypass surgery. <i>Biomedical Research (India)</i> . 2017;28:2909-2912                                                                                                                               | inappropriate data |
| Silbert B, Maruff P, Evered L, Scott D, Kalpokas M, Martin K, Lewis M, Myles P. Detection of cognitive decline after coronary surgery: A comparison of computerized and conventional tests. <i>Br J Anaesth</i> . 2004;92:814-820                                                                                                                                    | inappropriate data |
| Silbert BS, Evered LA, Scott DA, Cowie TF. The apolipoprotein e epsilon{[unate]4} allele is not associated with cognitive dysfunction in cardiac surgery. <i>Annals of Thoracic Surgery</i> . 2008;86:841-847                                                                                                                                                        | inappropriate data |
| Silbert BS, Scott DA, Evered LA, Lewis MS, Maruff PT. Preexisting cognitive impairment in patients scheduled for elective coronary artery bypass graft surgery. <i>Anesthesia and analgesia</i> . 2007;104:1023-contents                                                                                                                                             | inappropriate data |
| Silva FP, Schmidt AP, Valentin LS, Pinto KO, Zeferino SP, Oses JP, Wiener CD, Otsuki DA, Tort ABL, Portela LV, et al. S100b protein and neuron-specific enolase as predictors of cognitive dysfunction after coronary artery bypass graft surgery: A prospective observational study. <i>European Journal of Anaesthesiology</i> . 2016;33:681-689                   | inappropriate data |
| Sirvinskas E, Usas E, Mankute A, Raliene L, Jakuska P, Lenkutis T, Benetis R. Effects of intraoperative external head cooling on short-term cognitive function in patients after coronary artery bypass graft surgery. <i>Perfusion</i> . 2014;29:124-129                                                                                                            | inappropriate data |
| Smith PL. The cerebral complications of coronary artery bypass surgery. <i>Annals of the Royal College of Surgeons of England</i> . 1988;70:212-216                                                                                                                                                                                                                  | inappropriate data |
| Song Z, Fu P, Chen M, Bi Q. Association of ct perfusion and postoperative cognitive dysfunction after off-pump coronary artery bypass grafting. <i>Neurological Research</i> . 2016;38:533-537                                                                                                                                                                       | inappropriate data |
| Sousa Uva M, Cavaco S, Oliveira AG, Matias F, Silva C, Mesquita A, Aguiar P, Bau J, Pedro A, Magalhaes MP. Early graft patency after off-pump and on-pump coronary bypass surgery: A prospective randomized study. <i>European Heart Journal</i> . 2010;31:2492-2499                                                                                                 | inappropriate data |
| Stanley TO, Mackensen GB, Grocott HP, White WD, Blumenthal JA, Laskowitz DT, Landolfo KP, Reves JG, Mathew JP, Newman MF. The impact of postoperative atrial fibrillation on neurocognitive outcome after coronary artery bypass graft surgery. <i>Anesthesia and analgesia</i> . 2002;94:290-295                                                                    | inappropriate data |
| Steed L, Kong R, Stygall J, Acharya J, Bolla M, Harrison MJG, Humphries SE, Newman SP. The role of apolipoprotein e in cognitive decline after cardiac operation. <i>Annals of Thoracic Surgery</i> . 2001;71:823-826                                                                                                                                                | inappropriate data |
| Stroobant N, Van Nooten G, Belleghem YV, Vingerhoets G. Short-term and long-term neurocognitive outcome in on-pump versus off-pump cabg. <i>European Journal of Cardio-Thoracic Surgery</i> . 2002;22:559-564                                                                                                                                                        | inappropriate data |
| Stroobant N, van Nooten G, De Bacquer D, Van Belleghem Y, Vingerhoets G. Neuropsychological functioning 3-5 years after coronary artery bypass grafting: Does the pump make a difference? <i>European journal of cardio-thoracic surgery : official journal of the European Association for Cardio-thoracic Surgery</i> . 2008;34:396-401                            | inappropriate data |
| Stroobant N, Van Nooten G, Van Belleghem Y, Vingerhoets G. Relation between neurocognitive impairment, embolic load, and cerebrovascular reactivity following on- and off-pump coronary artery bypass grafting. <i>Chest</i> . 2005;127:1967-1976                                                                                                                    | inappropriate data |

|                                                                                                                                                                                                                                                                                                                                                                             |                    |
|-----------------------------------------------------------------------------------------------------------------------------------------------------------------------------------------------------------------------------------------------------------------------------------------------------------------------------------------------------------------------------|--------------------|
| Stroobant N, Vingerhoets G. Depression, anxiety, and neuropsychological performance in coronary artery bypass graft patients: A follow-up study. <i>Psychosomatics</i> . 2008;49:326-331                                                                                                                                                                                    | inappropriate data |
| Svenmarker S, Engström K, Karlsson T, Jansson E, Lindholm R, Aberg T. Influence of pericardial suction blood retransfusion on memory function and release of protein s100b. <i>Perfusion</i> . 2012;19:337-343                                                                                                                                                              | inappropriate data |
| Sweet JJ, Finnin E, Wolfe PL, Beaumont JL, Hahn E, Marymont J, Sanborn T, Rosengart TK. Absence of cognitive decline one year after coronary bypass surgery: Comparison to nonsurgical and healthy controls. <i>The Annals of thoracic surgery</i> . 2008;85:1571-1578                                                                                                      | inappropriate data |
| Szwed K, Pawliszak W, Anisimowicz L, Bucinski A, Borkowska A. Short-term outcome of attention and executive functions from aorta no-touch and traditional off-pump coronary artery bypass surgery. <i>The world journal of biological psychiatry : the official journal of the World Federation of Societies of Biological Psychiatry</i> . 2014;15:397-403                 | inappropriate data |
| Tabatabaie O, Matin N, Heidari A, Tabatabaie A, Hadaegh A, Yazdanynejad S, Tabatabaie K. Spinal anesthesia reduces postoperative delirium in opium dependent patients undergoing coronary artery bypass grafting. <i>Acta Anaesthesiologica Belgica</i> . 2015;66:49-54                                                                                                     | inappropriate data |
| Thomaidou E, Argiriadou H, Vretzakis G, Megari K, Taskos N, Chatzigeorgiou G, Anastasiadis K. Perioperative use of erythromycin reduces cognitive decline after coronary artery bypass grafting surgery: A pilot study. <i>Clinical Neuropharmacology</i> . 2017;40:195-200                                                                                                 | inappropriate data |
| Thornton EW, Groom C, Fabri BM, Fox MA, Hallas C, Jackson M. Quality of life outcomes after coronary artery bypass graft surgery: Relationship to neuropsychologic deficit. <i>The Journal of thoracic and cardiovascular surgery</i> . 2005;130:1022-1027                                                                                                                  | inappropriate data |
| Toner I, Peden CJ, Hamid SK, Newman S, Taylor KM, Smith PLC. Magnetic resonance imaging and neuropsychological changes after coronary artery bypass graft surgery: Preliminary findings. <i>Journal of neurosurgical anesthesiology</i> . 1994;6:163-169                                                                                                                    | inappropriate data |
| Toner I, Taylor KM, Lockwood G, Newman S, Smith PLC. Eeg changes during cardiopulmonary bypass surgery and postoperative neuropsychological deficit: The effect of bubble and membrane oxygenators. <i>European Journal of Cardio-Thoracic Surgery</i> . 1997;11:312-319                                                                                                    | inappropriate data |
| Toner I, Taylor KM, Newman S, Smith PLC. Cerebral functional changes following cardiac surgery: Neuropsychological and eeg assessment. <i>European Journal of Cardio-Thoracic Surgery</i> . 1998;13:13-20                                                                                                                                                                   | inappropriate data |
| Tully PJ, Baker RA, Kneebone AC, Knight JL. Neuropsychologic and quality-of-life outcomes after coronary artery bypass surgery with and without cardiopulmonary bypass: A prospective randomized trial. <i>Journal of cardiothoracic and vascular anesthesia</i> . 2008;22:515-521                                                                                          | inappropriate data |
| Tully PJ, Baker RA, Knight JL, Turnbull DA, Winefield HR. Neuropsychological function 5 years after cardiac surgery and the effect of psychological distress. <i>Archives of clinical neuropsychology : the official journal of the National Academy of Neuropsychologists</i> . 2009;24:741-751                                                                            | inappropriate data |
| van Dijk D, Diephuis J, Nierich A, Keizer A, Kalkman C. Beating heart versus conventional cardiopulmonary bypass: The octopus experience: A randomized comparison of 281 patients undergoing coronary artery bypass surgery with or without cardiopulmonary bypass. <i>Semin Cardiothorac Vasc Anesth</i> . 2006;10:167-170                                                 | inappropriate data |
| van Dijk D, Jansen E, Hijman R, Nierich A, Diephuis J, Moons K, Lahpor, Jr., Borst C, Keizer A, Nathoe H, et al. Cognitive outcome after off-pump and on-pump coronary artery bypass graft surgery: A randomized trial. <i>JAMA</i> . 2002;287:1405-1412                                                                                                                    | inappropriate data |
| van Dijk D, Moons KGM, Nathoe HM, van Aarnhem EHL, Borst C, Keizer AMA, Kalkman CJ, Hijman R, Octopus Study G. Cognitive outcomes five years after not undergoing coronary artery bypass graft surgery. <i>The Annals of thoracic surgery</i> . 2008;85:60-64                                                                                                               | inappropriate data |
| van Dijk D, Spoor M, Hijman R, Nathoe H, Borst C, Jansen E, Grobbee D, Jaegers P, Kalkman C. Cognitive and cardiac outcomes 5 years after off-pump vs on-pump coronary artery bypass graft surgery. <i>JAMA</i> . 2007;297:701-708                                                                                                                                          | inappropriate data |
| Vanninen R, Aikia M, Kononen M, Partanen K, Tulla H, Hartikainen P, Partanen J, Manninen H, Enberg P, Hippelainen M. Subclinical cerebral complications after coronary artery bypass grafting: Prospective analysis with magnetic resonance imaging, quantitative electroencephalography, and neuropsychological assessment. <i>Archives of neurology</i> . 1998;55:618-627 | inappropriate data |

|                                                                                                                                                                                                                                                                                                         |                             |
|---------------------------------------------------------------------------------------------------------------------------------------------------------------------------------------------------------------------------------------------------------------------------------------------------------|-----------------------------|
| Vedin J, Nyman H, Ericsson A, Hylander S, Vaage J. Cognitive function after on or off pump coronary artery bypass grafting. <i>European journal of cardio-thoracic surgery : official journal of the European Association for Cardio-thoracic Surgery</i> . 2006;30:305-310                             | inappropriate data          |
| Venn GE, Patel RL, Chambers DJ. Cardiopulmonary bypass: Perioperative cerebral blood flow and postoperative cognitive deficit. <i>The Annals of thoracic surgery</i> . 1995;59:1331-1335                                                                                                                | inappropriate data          |
| Wahrborg P, Booth JE, Clayton T, Nugara F, Pepper J, Weintraub WS, Sigwart U, Stables RH, So S. Neuropsychological outcome after percutaneous coronary intervention or coronary artery bypass grafting: Results from the stent or surgery (sos) trial. <i>Circulation</i> . 2004;110:3411-3417          | inappropriate data          |
| Wang D, Wu X, Li J, Xiao F, Liu X, Meng M. The effect of lidocaine on early postoperative cognitive dysfunction after coronary artery bypass surgery. <i>Anesthesia and analgesia</i> . 2002;95:1134-contents                                                                                           | inappropriate data          |
| Westaby S, Saatvedt K, White S, Katsumata T, Van Oeveren W, Bhatnagar NK, Brown S, Halligan PW. Is there a relationship between serum s-100beta protein and neuropsychologic dysfunction after cardiopulmonary bypass? <i>Journal of Thoracic and Cardiovascular Surgery</i> . 2000;119:132-137         | inappropriate data          |
| Whitaker D, Newman S, Stygall J, Hope-Wynne C, Harrison M, Walesby R. The effect of leucocyte-depleting arterial line filters on cerebral microemboli and neuropsychological outcome following coronary artery bypass surgery. <i>Eur J Cardiothorac Surg</i> . 2004;25:267-274                         | inappropriate data          |
| Whitaker D, Stygall J, Harrison M, Newman S. Relationship between white cell count, neuropsychologic outcome, and microemboli in 161 patients undergoing coronary artery bypass surgery. <i>The Journal of thoracic and cardiovascular surgery</i> . 2006;131:1358-1363                                 | inappropriate data          |
| Whitaker D, Stygall J, Hope-Wynne C, Walesby R, Harrison M, Newman S. A prospective clinical study of cerebral microemboli and neuropsychological outcome comparing vent-line and auto-venting arterial line filters: Both filters are equally safe. <i>Perfusion</i> . 2006;21:83-86                   | inappropriate data          |
| Whitaker DC, Green AJE, Stygall J, Harrison MJG, Newman SP. Evaluation of an alternative s100b assay for use in cardiac surgery: Relationship with microemboli and neuropsychological outcome. <i>Perfusion</i> . 2007;22:267-272                                                                       | inappropriate data          |
| Xu B, Qiao Q, Chen M, Rastogi R, Luo D, Bi Q. Relationship between neurological complications, cerebrovascular and cerebral perfusion following off-pump coronary artery bypass grafting. <i>Neurological Research</i> . 2015;37:421-426                                                                | inappropriate data          |
| Yin Y-q, Luo A-l, Guo X-y, Li L-h, Huang Y-g. Postoperative neuropsychological change and its underlying mechanism in patients undergoing coronary artery bypass grafting. <i>Chinese medical journal</i> . 2007;120:1951-1957                                                                          | inappropriate data          |
| Yoon BW, Bae HJ, Kang DW, Lee SH, Hong KS, Kim KB, Park BJ, Roh JK. Intracranial cerebral artery disease as a risk factor for central nervous system complications of coronary artery bypass graft surgery. <i>Stroke</i> . 2001;32:94-99                                                               | inappropriate data          |
| Zamvar V, Williams D, Hall J, Payne N, Cann C, Young K, Karthikeyan S, Dunne J. Assessment of neurocognitive impairment after off-pump and on-pump techniques for coronary artery bypass graft surgery: Prospective randomised controlled trial. <i>BMJ (Clinical research ed.)</i> . 2002;325:1268     | inappropriate data          |
| Zhang W, Hu W, Shen M, Ye X, Huang Y, Sun Y. Profiles of delirium and the clinical outcomes of patients who underwent coronary artery bypass grafting: A prospective study from china. <i>Journal of Clinical Nursing</i> . 2016;25:631-641                                                             | inappropriate data          |
| Zhang W, Sun Y, Liu Y, Qiu W, Ye X, Zhang G, Zhang L. A nursing protocol targeting risk factors for reducing postoperative delirium in patients following coronary artery bypass grafting: Results of a prospective before-after study. <i>International Journal of Nursing Sciences</i> . 2017;4:81-87 | inappropriate data          |
| Zimpfer D, Czerny M, Vogt F, Schuch P, Kramer L, Wolner E, Grimm M. Neurocognitive deficit following coronary artery bypass grafting: A prospective study of surgical patients and nonsurgical controls. <i>The Annals of thoracic surgery</i> . 2004;78:513-519                                        | inappropriate data          |
| Abrahamov D, Levran O, Naparstek S, Refaeli Y, Kaptson S, Abu Salah M, Ishai Y, Sahar G. Blood-brain barrier disruption after cardiopulmonary bypass: Diagnosis and correlation to cognition. <i>Annals of Thoracic Surgery</i> . 2017:no pagination                                                    | measure not operationalised |
| Abrahamov D, Levran O, Naparstek S, Refaeli Y, Kaptson S, Abu Salah M, Ishai Y, Sahar G. Blood-brain barrier disruption after cardiopulmonary bypass: Diagnosis and correlation to cognition. <i>Annals of Thoracic Surgery</i> . 2017;104:161-169                                                      | measure not operationalised |

|                                                                                                                                                                                                                                                                                                                                                                                 |                             |
|---------------------------------------------------------------------------------------------------------------------------------------------------------------------------------------------------------------------------------------------------------------------------------------------------------------------------------------------------------------------------------|-----------------------------|
| Abu-Omar Y, Cader S, Guerrieri Wolf L, Pigott D, Matthews PM, Taggart DP. Short-term changes in cerebral activity in on-pump and off-pump cardiac surgery defined by functional magnetic resonance imaging and their relationship to microembolization. <i>The Journal of thoracic and cardiovascular surgery</i> . 2006;132:1119-1125                                          | measure not operationalised |
| Al Jawad MA, Taha S. Nadir oxygen delivery to the brain as a risk factor for post-operative neurocognitive impairment in patients undergoing coronary artery bypass grafting: A myth or fact. <i>Journal of the Egyptian Society of Cardio-Thoracic Surgery</i> . 2018;26:49-56                                                                                                 | measure not operationalised |
| Al-Ruzzeh S, George S, Bustami M, Wray J, Ilsley C, Athanasiou T. Effect of off-pump coronary artery bypass surgery on clinical, angiographic, neurocognitive, and quality of life outcomes: Randomised controlled trial. <i>BMJ</i> . 2006;332:1365-1368                                                                                                                       | measure not operationalised |
| Andrell P, Jensen C, Norrsell H, Ekre O, Ekholm S, Norrsell U, Eliasson T, Mannheimer C, Blomstrand C. White matter disease in magnetic resonance imaging predicts cerebral complications after coronary artery bypass grafting. <i>The Annals of thoracic surgery</i> . 2005;79:74-80                                                                                          | measure not operationalised |
| Bak E, Marcisz C. Quality of life in elderly patients following coronary artery bypass grafting. <i>Patient preference and adherence</i> . 2014;8:289-299                                                                                                                                                                                                                       | measure not operationalised |
| Baufreton C, Allain P, Chevailler A, Etcharry-Bouyx F, Corbeau JJ, Legall D, de Brux JL. Brain injury and neuropsychological outcome after coronary artery surgery are affected by complement activation. <i>The Annals of thoracic surgery</i> . 2005;79:1597-1605                                                                                                             | measure not operationalised |
| Bayram H, Hidiroglu M, Cetin L, Kucuker A, Iriz E, Uguz E, Saglam F, Sener E. Comparing s-100 beta protein levels and neurocognitive functions between patients undergoing on-pump and off-pump coronary artery bypass grafting. <i>The Journal of surgical research</i> . 2013;182:198-202                                                                                     | measure not operationalised |
| Bergh C, Backstrom M, Jonsson H, Havinder L, Johnsson P. In the eye of both patient and spouse: Memory is poor 1 to 2 years after coronary bypass and angioplasty. <i>The Annals of thoracic surgery</i> . 2002;74:689-694                                                                                                                                                      | measure not operationalised |
| Bernet F, Baykut D, Reineke D, Matt P, Zerkowski HR. Impact of female gender on the early outcome in off-pump coronary artery bypass surgery. <i>European journal of medical research</i> . 2006;11:114-118                                                                                                                                                                     | measure not operationalised |
| Blumenthal JA, Madden DJ, Burker EJ, Croughwell N, Schniebolk S, Smith R, White WD, Hlatky M, Reves JG. A preliminary study of the effects of cardiac procedures on cognitive performance. <i>International journal of psychosomatics : official publication of the International Psychosomatics Institute</i> . 1991;38:13-16                                                  | measure not operationalised |
| Bokeria LA, Golukhova EZ, Breskina NY, Polunina AG, Davydov DM, Begachev AV, Kazanovskaya SN. Asymmetric cerebral embolic load and postoperative cognitive dysfunction in cardiac surgery. <i>Cerebrovascular diseases (Basel, Switzerland)</i> . 2007;23:50-56                                                                                                                 | measure not operationalised |
| Borde DP, Futane SS, Asegaonkar B, Apsingekar P, Khade S, Khodve B, Puranik M, George A, Joshi S. Effect of perioperative pregabalin on postoperative quality of recovery in patients undergoing off-pump coronary artery bypass grafting (opcabg): A prospective, randomized, double-blind trial. <i>Journal of Cardiothoracic and Vascular Anesthesia</i> . 2017;31:1241-1245 | measure not operationalised |
| Breuer AC, Furlan AJ, Hanson MR, Lederman RJ, Loop FD, Cosgrove DM, Greenstreet RL, Estafanous FG. Central nervous system complications of coronary artery bypass graft surgery: Prospective analysis of 421 patients. <i>Stroke</i> . 1983;14:682-687                                                                                                                          | measure not operationalised |
| Brillman J, Davis D, Clark RE, Price TRP, Lovell MR, Benckart DA. Increased middle cerebral artery flow velocity during the initial phase of cardiopulmonary bypass may cause neurological dysfunction. <i>Journal of Neuroimaging</i> . 1995;5:135-141                                                                                                                         | measure not operationalised |
| Browne SM, Halligan PW, Wade DT, Taggart DP. Postoperative hypoxia is a contributory factor to cognitive impairment after cardiac surgery. <i>The Journal of thoracic and cardiovascular surgery</i> . 2003;126:1061-1064                                                                                                                                                       | measure not operationalised |
| Bruggemans EF, Van Dijk JG, Huysmans HA. Residual cognitive dysfunctioning at 6 months following coronary artery bypass graft surgery. <i>European journal of cardio-thoracic surgery : official journal of the European Association for Cardio-thoracic Surgery</i> . 1995;9:636-643                                                                                           | measure not operationalised |
| Bull NJ, Turner A, Levi C, Hunter M. Effect of core temperature and embolic load during cardiac surgery on motion perception. <i>Heart, Lung &amp; Circulation</i> . 2016;25:512-519                                                                                                                                                                                            | measure not operationalised |
| Buschbeck D, Riess FC, Dobritsch B, Dahme B, Bleese N. Short-term neuropsychologic differences after normothermic versus hypothermic cardiopulmonary bypass. <i>The Journal of thoracic and cardiovascular surgery</i> . 1998;116:350-353                                                                                                                                       | measure not operationalised |

|                                                                                                                                                                                                                                                                                                                                                                                            |                             |
|--------------------------------------------------------------------------------------------------------------------------------------------------------------------------------------------------------------------------------------------------------------------------------------------------------------------------------------------------------------------------------------------|-----------------------------|
| Bute BP, Mathew J, Blumenthal JA, Welsh-Bohmer K, White WD, Mark D, Landolfo K, Newman MF, Neurological Outcome Research Group CAREIoT/DHCDNCUS, Allen ABBBCCCCDEEFF-SGHHHHHJKKLMNN. Female gender is associated with impaired quality of life 1 year after coronary artery bypass surgery. <i>Psychosomatic medicine</i> . 2003;65:944-951                                                | measure not operationalised |
| Camboni D, Schmidt S, Philipp A, Rupperecht L, Haneya A, Puehler T, Arlt M, Hilker M, Schmid C. Microbubble activity in miniaturized and in conventional extracorporeal circulation. <i>ASAIO journal (American Society for Artificial Internal Organs : 1992)</i> . 2009;55:58-62                                                                                                         | measure not operationalised |
| Can MG, Ulugol H, Gunes I, Aksu U, Tosun M, Karduz G, Vardar K, Toraman F. Effects of alprazolam and melatonin used for premedication on oxidative stress, glycolyx integrity and neurocognitive functions. <i>Turk Anestesi Ve Reanimasyon Dergisi</i> . 2018;46:233-237                                                                                                                  | measure not operationalised |
| Cavalcante ES, Magario R, Conforti CA, Junior GC, Arena R, Carvalho ACC, Buffolo E, Filho BL. Impact of intensive physiotherapy on cognitive function after coronary artery bypass graft surgery. <i>Arquivos Brasileiros de Cardiologia</i> . 2014;103:391-397                                                                                                                            | measure not operationalised |
| Chang JC, Shipstone A, Llenado-Lee MA. Postoperative thrombotic thrombocytopenic purpura following cardiovascular surgeries. <i>American journal of hematology</i> . 1996;53:11-17                                                                                                                                                                                                         | measure not operationalised |
| Charlson ME, Peterson JC, Krieger KH, Hartman GS, Hollenberg JP, Briggs WM, Segal AZ, Parikh M, Thomas SJ, Donahue RG, et al. Improvement of outcomes after coronary artery bypass ii: A randomized trial comparing intraoperative high versus customized mean arterial pressure. <i>Journal of Cardiac Surgery</i> . 2007;22:465-472                                                      | measure not operationalised |
| Cheng D, Newman M, Duke P, Wong D, Finegan B, Howie M, Fitch J, Bowdle T, Hogue C, Hillel Z, et al. The efficacy and resource utilization of remifentanyl and fentanyl in fast-track coronary artery bypass graft surgery: A prospective randomized, double-blinded controlled, multi-center trial. <i>Anesth Analg</i> . 2001;92:1094-1102                                                | measure not operationalised |
| Clark RE, Brillman J, Davis DA, Lovell MR, Price TR, Magovern GJ. Microemboli during coronary artery bypass grafting. Genesis and effect on outcome. <i>The Journal of thoracic and cardiovascular surgery</i> . 1995;109:249-248                                                                                                                                                          | measure not operationalised |
| Clough RA, Leavitt BJ, Morton JR, Plume SK, Hernandez F, Nugent W, Lahey SJ, Ross CS, O'Connor GT. The effect of comorbid illness on mortality outcomes in cardiac surgery. <i>Archives of Surgery</i> . 2002;137:428-433                                                                                                                                                                  | measure not operationalised |
| Cox ML, Gulack BC, Thibault DP, He X, Williams ML, Thourani VH, Jacobs JP, Brennan JM, Daneshmand MA, Acharya D. Outcomes after coronary artery bypass grafting in patients with myocardial infarction, cardiogenic shock and unresponsive neurological state: Analysis of the society of thoracic surgeons database. <i>European Journal of Cardio-Thoracic Surgery</i> . 2018;54:710-716 | measure not operationalised |
| Das S, Nanda SK, Bisoi AK, Wadhawan AN. Effect of preoperative statin therapy on early postoperative memory impairment after off-pump coronary artery bypass surgery. <i>Annals of Cardiac Anaesthesia</i> . 2016;19:38-44                                                                                                                                                                 | measure not operationalised |
| de Queiroz Guimaraes MNM, de Mello Almada Filho C. Functional status change in older adults undergoing coronary artery bypass surgery. <i>Sao Paulo Medical Journal</i> . 2011;129:99-106                                                                                                                                                                                                  | measure not operationalised |
| Delphin E, Jackson D, Gubenko Y, Botea A, Esrig B, Fritz W, Mavridis S. Sevoflurane provides earlier tracheal extubation and assessment of cognitive recovery than isoflurane in patients undergoing off-pump coronary artery bypass surgery. <i>J Cardiothorac Vasc Anesth</i> . 2007;21:690-695                                                                                          | measure not operationalised |
| Demir G, Cukurova Z, Eren G, Hergunsel O. Comparison of the effects of on-pump and off-pump coronary artery bypass surgery on cerebral oxygen saturation using near-infrared spectroscopy. <i>Korean Journal of Anesthesiology</i> . 2014;67:391-397                                                                                                                                       | measure not operationalised |
| Diegeler A, Hirsch R, Schneider F, Schilling LO, Falk V, Rauch T, Mohr FW. Neuromonitoring and neurocognitive outcome in off-pump versus conventional coronary bypass operation. <i>The Annals of thoracic surgery</i> . 2000;69:1162-1166                                                                                                                                                 | measure not operationalised |
| Dogan S, Graubitz K, Aybek T, Khan MF, Kessler P, Moritz A, Wimmer-Greinecker G. How safe is the port access technique in minimally invasive coronary artery bypass grafting? <i>The Annals of thoracic surgery</i> . 2002;74:1537-1543                                                                                                                                                    | measure not operationalised |
| Doganci S, Gunaydin S, Kocak OM, Yilmaz S, Demirkilic U. Impact of the intensity of microemboli on neurocognitive outcome following cardiopulmonary bypass. <i>Perfusion</i> . 2013;28:256-262                                                                                                                                                                                             | measure not operationalised |

|                                                                                                                                                                                                                                                                                                                                                                  |                             |
|------------------------------------------------------------------------------------------------------------------------------------------------------------------------------------------------------------------------------------------------------------------------------------------------------------------------------------------------------------------|-----------------------------|
| Doraiswamy PM, Babyak MA, Hennig T, Trivedi R, White WD, Mathew JP, Newman MF, Blumenthal JA. Donepezil for cognitive decline following coronary artery bypass surgery: A pilot randomized controlled trial. <i>Psychopharmacology bulletin</i> . 2007;40:54-62                                                                                                  | measure not operationalised |
| Dupuis G, Kennedy E, Lindquist R, Barton FB, Terrin ML, Hoogwerf BJ, Czajkowski SM, Herd JA, Post CBSI, Ayanian BBBBBCDGGHHKKLLLLMMNNNNNPRRSS. Coronary artery bypass graft surgery and cognitive performance. <i>American Journal of Critical Care</i> . 2006;15:471-478                                                                                        | measure not operationalised |
| Engelhardt W, Dierks T, Pause M, Sold M, Hartung E, Silber R. P300-mapping--a neurophysiological tool to quantify cerebral dysfunction after coronary artery bypass grafting. <i>European journal of cardio-thoracic surgery : official journal of the European Association for Cardio-thoracic Surgery</i> . 1995;9:12-17                                       | measure not operationalised |
| Engelman RM, Pleet AB, Rousou JA, Flack JE, 3rd, Deaton DW, Pekow PS, Gregory CA. Influence of cardiopulmonary bypass perfusion temperature on neurologic and hematologic function after coronary artery bypass grafting. <i>The Annals of thoracic surgery</i> . 1999;67:1547-1556                                                                              | measure not operationalised |
| Eremina DA, Shchelkova OY. The dynamics of the cognitive functioning and emotional state of cardiac patients during rehabilitation after coronary revascularization. <i>Psychology in Russia: State of the Art</i> . 2017;10:201-214                                                                                                                             | measure not operationalised |
| Erol DD, Ibis HA. Glutamate/aspartate supplementation during cardiopulmonary bypass: Effect on postoperative neurocognitive function. <i>The heart surgery forum</i> . 2008;11:E17-20                                                                                                                                                                            | measure not operationalised |
| Farhoudi M, Parvizi R, Bilehjani E, Tarzamni MK, Mehrvar K, Safaiyan A. Preoperative transcranial and carotid doppler study in coronary artery bypass graft patients. <i>Neurosciences (Riyadh, Saudi Arabia)</i> . 2007;12:42-45                                                                                                                                | measure not operationalised |
| Fearn SJ, Pole R, Wesnes K, Faragher EB, Hooper TL, McCollum CN. Cerebral injury during cardiopulmonary bypass: Emboli impair memory. <i>The Journal of thoracic and cardiovascular surgery</i> . 2001;121:1150-1160                                                                                                                                             | measure not operationalised |
| Finkelmeier BA, Kaye GM, Saba YS, Parker MA. Influence of age on postoperative course in coronary artery bypass patients. <i>The Journal of cardiovascular nursing</i> . 1993;7:38-46                                                                                                                                                                            | measure not operationalised |
| Fish KJ, Helms KN, Sarnquist FH, van Steennis C, Linet OI, Hilberman M, Mitchell RS, Jamieson SW, Miller DC, Tinklenberg JS. A prospective, randomized study of the effects of prostacyclin on neuropsychologic dysfunction after coronary artery operation. <i>The Journal of thoracic and cardiovascular surgery</i> . 1987;93:609-615                         | measure not operationalised |
| Flesch M, Knipp S, Kessler G, Geissler H-J, Massoudy P, Wilhelm H, Philipp T, Erdmann E. Arta: At1-receptor blocker therapy in patients undergoing coronary artery bypass grafting. <i>Clinical research in cardiology : official journal of the German Cardiac Society</i> . 2009;98:33-43                                                                      | measure not operationalised |
| Folks DG, Franceschini J, Sokol RS, Freeman 3rd AM, Folks DM. Coronary artery bypass surgery in older patients: Psychiatric morbidity. <i>Southern medical journal</i> . 1986;79:303-306                                                                                                                                                                         | measure not operationalised |
| Freeman AM, 3rd, Folks DG, Sokol RS, Govier AV, Reves JG, Fleece EL, Hall KR, Zorn GL, Karp RB. Cognitive function after coronary bypass surgery: Effect of decreased cerebral blood flow. <i>The American journal of psychiatry</i> . 1985;142:110-112                                                                                                          | measure not operationalised |
| Freundt M, Ried M, Philipp A, Diez C, Kolat P, Hirt SW, Schmid C, Haneya A. Minimized extracorporeal circulation is improving outcome of coronary artery bypass surgery in the elderly. <i>Perfusion</i> . 2016;31:143-148                                                                                                                                       | measure not operationalised |
| Gasparovic H, Malojcic B, Borojevic M, Vojkovic J, Gabelica R, Milicic D, Biocina B. Reduction of microembolic signals with a single-clamp strategy in coronary artery bypass surgery: A pilot study. <i>The heart surgery forum</i> . 2009;12:E357-361                                                                                                          | measure not operationalised |
| Gerriets T, Schwarz N, Sammer G, Baehr J, Stolz E, Kaps M, Kloevokorn W, Bachmann G, Schönburg M. Protecting the brain from gaseous and solid micro-emboli during coronary artery bypass grafting: A randomized controlled trial. <i>Eur Heart J</i> . 2010;31:360-368                                                                                           | measure not operationalised |
| Geyik S, Yigiter R, Akcali A, Deniz H, Murat Geyik A, Ali Elci M, Hafiz E. The effect of circadian melatonin levels on inflammation and neurocognitive functions following coronary bypass surgery. <i>Annals of thoracic and cardiovascular surgery : official journal of the Association of Thoracic and Cardiovascular Surgeons of Asia</i> . 2015;21:466-473 | measure not operationalised |

|                                                                                                                                                                                                                                                                                                                                                                       |                             |
|-----------------------------------------------------------------------------------------------------------------------------------------------------------------------------------------------------------------------------------------------------------------------------------------------------------------------------------------------------------------------|-----------------------------|
| Ghafari R, Baradari A, Firouzian A, Nouraei M, Aarabi M, Zamani A, Emami ZA. Cognitive deficit in first-time coronary artery bypass graft patients: A randomized clinical trial of lidocaine versus procaine hydrochloride. <i>Perfusion</i> . 2012;27:320-325                                                                                                        | measure not operationalised |
| Gokgoz L, Gunaydin S, Sinci V, Unlu M, Boratav C, Babacan A, Soncul H, Halit V, Inanir S, Ersoz A. Psychiatric complications of cardiac surgery postoperative delirium syndrome. <i>Scandinavian Cardiovascular Journal</i> . 1997;31:217-222                                                                                                                         | measure not operationalised |
| Gong Z, Li J, Zhong Y, Guan X, Huang A, Ma L. Effects of dexmedetomidine on postoperative cognitive function in patients undergoing coronary artery bypass grafting. <i>Experimental and Therapeutic Medicine</i> . 2018;16:4685-4689                                                                                                                                 | measure not operationalised |
| Gonzalez-Scarano F, Hurtig HI. Neurologic complications of coronary artery bypass grafting: Case-control study. <i>Neurology</i> . 1981;31:1032-1035                                                                                                                                                                                                                  | measure not operationalised |
| Gottesman RF, Hillis AE, Grega MA, Borowicz Jr LM, Selnes OA, Baumgartner WA, McKhann GM. Early postoperative cognitive dysfunction and blood pressure during coronary artery bypass graft operation. <i>Archives of neurology</i> . 2007;64:1111-1114                                                                                                                | measure not operationalised |
| Grega MA, Borowicz LM, Baumgartner WA. Impact of single clamp versus double clamp technique on neurologic outcome. <i>The Annals of thoracic surgery</i> . 2003;75:1387-1391                                                                                                                                                                                          | measure not operationalised |
| Grothusen C, Friedrich C, Attmann T, Meinert J, Ohnewald E, Ulbricht U, Huenges K, Haneya A, Frank D, Graesner JT, et al. Coronary artery bypass surgery within 48 hours after cardiac arrest due to acute myocardial infarction. <i>European Journal of Cardio-Thoracic Surgery</i> . 2017;52:297-302                                                                | measure not operationalised |
| Habib S, Khan AR, Iqbal Afridi M, Saeed A, Jan AF, Amjad N. Frequency and predictors of cognitive decline in patients undergoing coronary artery bypass graft surgery. <i>Journal of the College of Physicians and Surgeons Pakistan</i> . 2014;24:543-548                                                                                                            | measure not operationalised |
| Halici U, Acipayam M, Uncu H, Altinay L, Ketenciler S, Ozsoyler I. A retrospective comparison of early results of isolated coronary artery bypass surgery in young (<40 years) and middle aged (40-60 years) patients. <i>Acta Medica Mediterranea</i> 2015;31:807-811                                                                                                | measure not operationalised |
| Halkos ME, Anderson A, Binongo JNG, Stringer A, Lasanajak Y, Thourani VH, Lattouf OM, Guyton RA, Baio KT, Sarin E, et al. Operative strategies to reduce cerebral embolic events during on- and off-pump coronary artery bypass surgery: A stratified, prospective randomized trial. <i>Journal of Thoracic and Cardiovascular Surgery</i> . 2017;154:1278-1285.e1271 | measure not operationalised |
| Hassani S, Alipour A, Darvishi Khezri H, Firouzian A, Emami Zeydi A, Gholipour Baradari A, Ghafari R, Habibi W-A, Tahmasebi H, Alipour F, et al. Can valeriana officinalis root extract prevent early postoperative cognitive dysfunction after cabg surgery? A randomized, double-blind, placebo-controlled trial. <i>Psychopharmacology</i> . 2015;232:843-850      | measure not operationalised |
| Hempe S, Moza A, Goetzenich A, Tewarie L, Bleilevens C, Autschbach R, Schnoering H, Zayat R. Synchronous or staged carotid endarterectomy and coronary artery bypass grafting? Propensity score matched study. <i>Heart Surgery Forum</i> . 2018;21:E359-E364                                                                                                         | measure not operationalised |
| Holinski S, Claus B, Alaaraj N, Dohmen PM, Kirilova K, Neumann K, Uebelhack R, Konertz W. Cerebroprotective effect of piracetam in patients undergoing coronary bypass surgery. <i>Medical Science Monitor</i> . 2008;14:PI53-PI57                                                                                                                                    | measure not operationalised |
| Holinski S, Claus B, Barajas T, Neumann K, Uebelhack R, Konertz W. Cerebroprotective effect of preoperative dual antiplatelet therapy in patients undergoing coronary bypass surgery. <i>Annals of thoracic and cardiovascular surgery : official journal of the Association of Thoracic and Cardiovascular Surgeons of Asia</i> . 2014;20:38-43                      | measure not operationalised |
| Holinski S, Claus B, Haeger N, Neumann K, Uebelhack R, Konertz W. Effect of different pump heads for cpb on early cognitive outcome after coronary artery bypass surgery. <i>Annals of thoracic and cardiovascular surgery : official journal of the Association of Thoracic and Cardiovascular Surgeons of Asia</i> . 2013;19:273-278                                | measure not operationalised |
| Issitt RW, Harvey I, Walsh B, Voegeli D. Quantification of lipid filtration and the effects on cerebral injury during cardiopulmonary bypass. <i>Annals of Thoracic Surgery</i> . 2017;104:884-890                                                                                                                                                                    | measure not operationalised |
| Ji F, Li Z, Young N, Moore P, Liu H. Perioperative dexmedetomidine improves mortality in patients undergoing coronary artery bypass surgery. <i>Journal of cardiothoracic and vascular anesthesia</i> . 2014;28:267-273                                                                                                                                               | measure not operationalised |



|                                                                                                                                                                                                                                                                                                                                                                                                                                                 |                             |
|-------------------------------------------------------------------------------------------------------------------------------------------------------------------------------------------------------------------------------------------------------------------------------------------------------------------------------------------------------------------------------------------------------------------------------------------------|-----------------------------|
| Jonsson H, Johnsson P, Alling C, Westaby S, Blomquist S. Significance of serum s100 release after coronary artery bypass grafting. <i>The Annals of thoracic surgery</i> . 1998;65:1639-1644                                                                                                                                                                                                                                                    | measure not operationalised |
| Joudi M, Fathi M, Harati H, Joudi M, Izanloo A, Rahdari A, Soltani G. Evaluating the incidence of cognitive disorder following off-pump coronary artery bypasses surgery and its predisposing factors. <i>Anesthesiology and pain medicine</i> . 2014;4:e18545                                                                                                                                                                                  | measure not operationalised |
| Kadoi Y, Goto F. Factors associated with postoperative cognitive dysfunction in patients undergoing cardiac surgery. <i>Surgery today</i> . 2006;36:1053-1057                                                                                                                                                                                                                                                                                   | measure not operationalised |
| Kanbak M, Saricaoglu F, Akinci SB, Oc B, Balci H, Celebioglu B, Aypar U. The effects of isoflurane, sevoflurane, and desflurane anesthesia on neurocognitive outcome after cardiac surgery: A pilot study. <i>The heart surgery forum</i> . 2007;10:E36-41                                                                                                                                                                                      | measure not operationalised |
| Kara I, Erkin A, Sacli H, Demirtas M, Percin B, Diler MS, Kirali K. The effects of near-infrared spectroscopy on the neurocognitive functions in the patients undergoing coronary artery bypass grafting with asymptomatic carotid artery disease: A randomized prospective study. <i>Annals of thoracic and cardiovascular surgery : official journal of the Association of Thoracic and Cardiovascular Surgeons of Asia</i> . 2015;21:544-550 | measure not operationalised |
| Kawahara F, Kadoi Y, Saito S, Goto F, Fujita N. Slow rewarming improves jugular venous oxygen saturation during rewarming. <i>Acta anaesthesiologica Scandinavica</i> . 2003;47:419-424                                                                                                                                                                                                                                                         | measure not operationalised |
| Keizer AMA, Hijman R, van Dijk D, Kalkman CJ, Kahn RS. Cognitive self-assessment one year after on-pump and off-pump coronary artery bypass grafting. <i>The Annals of thoracic surgery</i> . 2003;75:835-839                                                                                                                                                                                                                                   | measure not operationalised |
| Khosravi A, Skrabal CA, Westphal B, Kundt G, Greim B, Kunesch E, Liebold A, Steinhoff G. Evaluation of coated oxygenators in cardiopulmonary bypass systems and their impact on neurocognitive function. <i>Perfusion</i> . 2005;20:249-254                                                                                                                                                                                                     | measure not operationalised |
| Kilo J, Czerny M, Gorlitzer M, Zimpfer D, Baumer H, Wolner E, Grimm M. Cardiopulmonary bypass affects cognitive brain function after coronary artery bypass grafting. <i>The Annals of thoracic surgery</i> . 2001;72:1926-1932                                                                                                                                                                                                                 | measure not operationalised |
| Klonoff H, Clark C, Kavanagh-Gray D, Mizgala H, Munro I. Two-year follow-up study of coronary bypass surgery. Psychologic status, employment status, and quality of life. <i>The Journal of thoracic and cardiovascular surgery</i> . 1989;97:78-85                                                                                                                                                                                             | measure not operationalised |
| Klonoff H, Fleetham J, Taylor R, Clark C. Treatment outcome of obstructive sleep apnea: Physiological and neuropsychological concomitants. <i>Journal of Nervous and Mental Disease</i> . 1987;175:208-212                                                                                                                                                                                                                                      | measure not operationalised |
| Knapik P, Ciesla D, Wawrzynczyk M, Knapik M, Borkowski J, Zembala M. Incidence and prediction of permanent neurological deficits after cardiac surgery - are the existing models of prediction truly global? <i>European journal of cardio-thoracic surgery : official journal of the European Association for Cardio-thoracic Surgery</i> . 2010;37:717-723                                                                                    | measure not operationalised |
| Knipp SC, Matatko N, Wilhelm H, Schlamann M, Massoudy P, Forsting M, Diener HC, Jakob H. Evaluation of brain injury after coronary artery bypass grafting. A prospective study using neuropsychological assessment and diffusion-weighted magnetic resonance imaging. <i>European journal of cardio-thoracic surgery : official journal of the European Association for Cardio-thoracic Surgery</i> . 2004;25:791-800                           | measure not operationalised |
| Kobayashi T, Hamano K, Mikamo A, Okada H, Gohra H, Miyamoto M, Oda T, Esato K. Perioperative features of coronary artery bypass grafting in patients aged 75 years or older. <i>The Japanese journal of thoracic and cardiovascular surgery : official publication of the Japanese Association for Thoracic Surgery = Nihon Kyobu Geka Gakkai zasshi</i> . 2002;50:152-157                                                                      | measure not operationalised |
| Koenig MA, Grega MA, Bailey MM, Pham LD, Zeger SL, Baumgartner WA, McKhann GM. Statin use and neurologic morbidity after coronary artery bypass grafting: A cohort study. <i>Neurology</i> . 2009;73:2099-2106                                                                                                                                                                                                                                  | measure not operationalised |
| Kopp M, Knuenz A, Oberascher F, Pfaffenberger N, Lucic N, Ruedl G, Holzner B, Bonaros N, Johannes B. Psychomotor car-driving abilities after robotically assisted totally endoscopic coronary artery bypass grafting. <i>The Thoracic and cardiovascular surgeon</i> . 2012;60:462-467                                                                                                                                                          | measure not operationalised |
| Kornfeld DS, Heller SS, Frank KA, Edie RN, Barsa J. Delirium after coronary artery bypass surgery. <i>The Journal of thoracic and cardiovascular surgery</i> . 1978;76:93-96                                                                                                                                                                                                                                                                    | measure not operationalised |

|                                                                                                                                                                                                                                                                                                                                                            |                             |
|------------------------------------------------------------------------------------------------------------------------------------------------------------------------------------------------------------------------------------------------------------------------------------------------------------------------------------------------------------|-----------------------------|
| Kotfis K, Szylińska A, Listewnik M, Lechowicz K, Kosiorowska M, Drozdal S, Brykczynski M, Rotter I, Zukowski M. Balancing intubation time with postoperative risk in cardiac surgery patients - a retrospective cohort analysis. <i>Therapeutics &amp; Clinical Risk Management</i> . 2018;14:2203-2212                                                    | measure not operationalised |
| Krannich J-H, Tobias T, Broscheit J, Leyh R, Mullges W. Diabetes severely affects attentional performance after coronary artery bypass grafting. <i>Journal Of Cardiothoracic Surgery</i> . 2012;7:115                                                                                                                                                     | measure not operationalised |
| Krzych LJ, Szurlej D, Kooldziej T, Machej L, Weglarzy A, Balch A, Wilczynski M, Wos S, Bochenek A. Diagnostic accuracy of pre-operative nt-probnp level in predicting short-term outcomes in coronary surgery: A pilot study. <i>Kardiologia Polska</i> . 2011;69:1121-1127                                                                                | measure not operationalised |
| Kunihara T, Tscholl D, Langer F, Heinz G, Sata F, Schafers HJ. Cognitive brain function after hypothermic circulatory arrest assessed by cognitive p300 evoked potentials. <i>European Journal of Cardio-Thoracic Surgery</i> . 2007;32:507-513                                                                                                            | measure not operationalised |
| Kuzma E, Airdrie J, Littlejohns TJ, Lourida I, Thompson-Coon J, Lang IA, Scrobotovici M, Thacker EL, Fitzpatrick A, Kuller LH, et al. Coronary artery bypass graft surgery and dementia risk in the cardiovascular health study. <i>Alzheimer Disease &amp; Associated Disorders</i> . 2017;31:120-127                                                     | measure not operationalised |
| Lamy A, Devereaux PJ, Prabhakaran D, Taggart DP, Hu S, Paolasso E, Straka Z, Piegas LS, Akar AR, Jain AR, et al. Effects of off-pump and on-pump coronary-artery bypass grafting at 1 year. <i>New England Journal of Medicine</i> . 2013;368:1179-1188                                                                                                    | measure not operationalised |
| Lee TA, Wolozin B, Weiss KB, Bednar MM. Assessment of the emergence of alzheimer's disease following coronary artery bypass graft surgery or percutaneous transluminal coronary angioplasty. <i>Journal of Alzheimer's disease : JAD</i> . 2005;7:319-324                                                                                                  | measure not operationalised |
| Lelis RGB, Krieger JE, Pereira AC, Schmidt AP, Carmona MJ, Oliveira SA, Auler JOC, Jr. Apolipoprotein e4 genotype increases the risk of postoperative cognitive dysfunction in patients undergoing coronary artery bypass graft surgery. <i>The Journal of cardiovascular surgery</i> . 2006;47:451-456                                                    | measure not operationalised |
| Lewis M, Maruff P, Silbert B. Examination of the use of cognitive domains in postoperative cognitive dysfunction after coronary artery bypass graft surgery. <i>Ann Thorac Surg</i> . 2005;80:910-916                                                                                                                                                      | measure not operationalised |
| Loberman D, Consalvi C, Healey A, Rivera B, Poulin K, Mohr R, Ziv-Baran T. Adverse cerebral outcomes after coronary artery bypass surgery-more than a decade of experience in a single center. <i>Thoracic and Cardiovascular Surgeon</i> . 2018;66:452-456                                                                                                | measure not operationalised |
| Loladze G, Kuehnelt RU, Claus T, Hartrumpf M, Kuepper F, Pohl M, Albes JM. Double-wire versus single-wire sternal closure in obese patients: A randomized prospective study. <i>Thoracic &amp; Cardiovascular Surgeon</i> . 2017;65:332-337                                                                                                                | measure not operationalised |
| Luo D, Yip J, Song Z, Xu B, Bi Q. Ct perfusion in predicting the morbidity and prognosis of hypoxic-ischemic encephalopathy after off-pump coronary artery bypass grafting. <i>Neurological Research</i> . 2017;39:521-529                                                                                                                                 | measure not operationalised |
| Lyketsos CG, Toone L, Tschanz J, Corcoran C, Norton M, Zandi P, Munger R, Breitner JCS, Welsh-Bohmer K, Cache County Study G, et al. A population-based study of the association between coronary artery bypass graft surgery (cabg) and cognitive decline: The cache county study. <i>International Journal of Geriatric Psychiatry</i> . 2006;21:509-518 | measure not operationalised |
| Martin TD, Craver JM, Gott JP, Weintraub WS, Ramsay J, Mora CT, Guyton RA, Weisel RD, Engelman RM, Vaughn CC, et al. Prospective, randomized trial of retrograde warm blood cardioplegia: Myocardial benefit and neurologic threat. <i>Annals of Thoracic Surgery</i> . 1994;57:298-304                                                                    | measure not operationalised |
| Martinovic I, Lindemann S, Irsqusi M, Mirat J, Vcev A, Wittlinger T, Noutsias M. Minimally invasive direct coronary bypass surgery via distal mini-sternotomy : Promising clinical results with anaortic, multivessel, all-arterial technique. <i>Herz</i> . 2018;10:10                                                                                    | measure not operationalised |
| Mathisen L, Langaas PS, Andersen MH, Hol PK, Fredriksen PM, Sundet K, Rokne B, Wahl AK, Fosse E. Changes in cardiac and cognitive function and self-reported outcomes at one year after coronary artery bypass grafting. <i>The Journal of thoracic and cardiovascular surgery</i> . 2010;140:122-128                                                      | measure not operationalised |
| McKhann GM, Grega MA, Borowicz Jr LM, Bechamps M, Selnes OA, Baumgartner WA, Royall RM. Encephalopathy and stroke after coronary artery bypass grafting: Incidence, consequences, and prediction. <i>Archives of neurology</i> . 2002;59:1422-1428                                                                                                         | measure not operationalised |
| McLean RF, Wong BI, Naylor CD, Snow WG, Harrington EM, Gawel M, Fremes SE. Cardiopulmonary bypass, temperature, and central nervous system dysfunction. <i>Circulation</i> . 1994;90:II250-255                                                                                                                                                             | measure not operationalised |

|                                                                                                                                                                                                                                                                                                                                                                                     |                             |
|-------------------------------------------------------------------------------------------------------------------------------------------------------------------------------------------------------------------------------------------------------------------------------------------------------------------------------------------------------------------------------------|-----------------------------|
| Merwin SL, Abram HS. Psychologic response to coronary artery bypass. Southern medical journal. 1977;70:153-155                                                                                                                                                                                                                                                                      | measure not operationalised |
| Mesgerani M, Begum K. Body mass index (bmi) as a factor influencing post surgical events in patients with coronary artery bypass grafting (cabg). JPMI - Journal of Postgraduate Medical Institute. 2009;23:296-303                                                                                                                                                                 | measure not operationalised |
| Millar K, Asbury AJ, Murray GD. Pre-existing cognitive impairment as a factor influencing outcome after cardiac surgery. British Journal of Anaesthesia. 2001;86:63-67                                                                                                                                                                                                              | measure not operationalised |
| Miyairi T, Takamoto S, Kotsuka Y, Takeuchi A, Yamanaka K, Sato H. Comparison of neurocognitive results after coronary artery bypass grafting and thoracic aortic surgery using retrograde cerebral perfusion. European journal of cardio-thoracic surgery : official journal of the European Association for Cardio-thoracic Surgery. 2005;28:97-93                                 | measure not operationalised |
| Moazen-Zadeh E, Abbasi SH, Safi-Aghdam H, Shahmansouri N, Arjmandi-Beglar A, Hajhosseinn Talasaz A, Salehiomran A, Forghani S, Akhondzadeh S. Effects of saffron on cognition, anxiety, and depression in patients undergoing coronary artery bypass grafting: A randomized double-blind placebo-controlled trial. Journal of Alternative & Complementary Medicine. 2018;24:361-368 | measure not operationalised |
| Morino Y, Hara K, Tanabe K, Kuroda Y, Ayabe S, Kozuma K, Kigawa I, Fukuda S, Wanibuchi Y, Tamura T. Retrospective analysis of cerebral complications after coronary artery bypass grafting in elderly patients. Japanese circulation journal. 2000;64:46-50                                                                                                                         | measure not operationalised |
| Mullges W, Berg D, Schmidtke A, Weinacker B, Toyka KV. Early natural course of transient encephalopathy after coronary artery bypass grafting. Critical care medicine. 2000;28:1808-1811                                                                                                                                                                                            | measure not operationalised |
| Mullges W, Franke D, Reents W, Babin-Ebell J, Toyka KV. Reduced rate of microembolism by optimized aortic cannula position does not influence early postoperative cognitive performance in cabg patients. Cerebrovascular diseases (Basel, Switzerland). 2003;15:192-198                                                                                                            | measure not operationalised |
| Mutch WAC, Fransoo RR, Campbell BI, Chateau DG, Sirski M, Warriar RK. Dementia and depression with ischemic heart disease: A population-based longitudinal study comparing interventional approaches to medical management. PloS one. 2011;6:e17457                                                                                                                                 | measure not operationalised |
| Newman S, Klinger L, Venn G, Smith P, Harrison M, Treasure T. Subjective reports of cognition in relation to assessed cognitive performance following coronary artery bypass surgery. Journal of Psychosomatic Research. 1989;33:227-233                                                                                                                                            | measure not operationalised |
| Nina VJdS, Rocha MIdA, Rodrigues RF, Oliveira VCd, Teixeira JLL, Figueredo ED, Nina RVdAH, Sousa CAC. Assesment of cabdeal score as predictor of neurological dysfunction after on-pump coronary artery bypass grafting surgery. Revista brasileira de cirurgia cardiovascular : orgao oficial da Sociedade Brasileira de Cirurgia Cardiovascular. 2012;27:429-435                  | measure not operationalised |
| Pacini D, Di Marco L, Leone A, Tonon C, Pettinato C, Fonti C, Manners DN, Di Bartolomeo R. Cerebral functions and metabolism after antegrade selective cerebral perfusion in aortic arch surgery. European journal of cardio-thoracic surgery : official journal of the European Association for Cardio-thoracic Surgery. 2010;37:1322-1331                                         | measure not operationalised |
| Palanzo DA, Zarro DL. The effect of fast-tracking on neurological complications post-cardiopulmonary bypass. Perfusion. 1996;11:451-453                                                                                                                                                                                                                                             | measure not operationalised |
| Park YJ, Yoon JW, Kim KI, Lee YJ, Kim KW, Choi SH, Lim S, Choi DJ, Park K-H, Choh JH, et al. Subclinical hypothyroidism might increase the risk of transient atrial fibrillation after coronary artery bypass grafting. The Annals of thoracic surgery. 2009;87:1846-1852                                                                                                           | measure not operationalised |
| Prapas SN, Panagiotopoulos IA, Pentchev DN, Ayyad MAS, Protogeros DA, Kotsis VN, Linardakis IN, Tzanavaras TP, Stratigi PT. Aorta no-touch off-pump coronary artery revascularization in octogenarians: 5 years' experience. The heart surgery forum. 2009;12:E349-353                                                                                                              | measure not operationalised |
| Puehler T, Haneya A, Philipp A, Zausig YA, Kobuch R, Diez C, Birnbaum DE, Schmid C. Minimized extracorporeal circulation system in coronary artery bypass surgery: A 10-year single-center experience with 2243 patients. European journal of cardio-thoracic surgery : official journal of the European Association for Cardio-thoracic Surgery. 2011;39:459-464                   | measure not operationalised |

|                                                                                                                                                                                                                                                                                                                                         |                             |
|-----------------------------------------------------------------------------------------------------------------------------------------------------------------------------------------------------------------------------------------------------------------------------------------------------------------------------------------|-----------------------------|
| Rankin KP, Kochamba GS, Boone KB, Petitti DB, Buckwalter JG. Presurgical cognitive deficits in patients receiving coronary artery bypass graft surgery. <i>Journal of the International Neuropsychological Society</i> : JINS. 2003;9:913-924                                                                                           | measure not operationalised |
| Reineke D, Winkler B, Konig T, Meszaros K, Sodeck G, Schonhoff F, Erdoes G, Czerny M, Carrel T. Minimized extracorporeal circulation does not impair cognitive brain function after coronary artery bypass grafting. <i>Interactive cardiovascular and thoracic surgery</i> . 2015;20:68-73                                             | measure not operationalised |
| Ried M, Kobuch R, Rupprecht L, Keyser A, Hilker M, Schmid C, Diez C. Reduced 30-day mortality in men after elective coronary artery bypass surgery with minimized extracorporeal circulation-a propensity score analysis. <i>BMC Cardiovascular Disorders</i> . 2012;12:17                                                              | measure not operationalised |
| Roach GW, Kanchuger M, Mangano CM, Newman M, Nussmeier N, Wolman R, Aggarwal A, Marschall K, Graham SH, Ley C, et al. Adverse cerebral outcomes after coronary bypass surgery. <i>The New England journal of medicine</i> . 1996;335:1857-1863                                                                                          | measure not operationalised |
| Sabban MA, Jalal A, Bakir BM, Alshaer AA, Abbas OA, Abdal-Aal MM, Awadallah YA, Al-Saddique AA, Fouda MA. Comparison of neurological outcomes in patients undergoing conventional coronary artery bypass grafting, on-pump beating heart coronary bypass, and off-pump coronary bypass. <i>Neurosciences</i> . 2007;12:35-41            | measure not operationalised |
| Sabik JF, Gillinov AM, Blackstone EH, Vacha C, Houghtaling PL, Navia J, Smedira NG, McCarthy PM, Cosgrove DM, Lytle BW, et al. Does off-pump coronary surgery reduce morbidity and mortality? <i>Journal of Thoracic and Cardiovascular Surgery</i> . 2002;124:698-707                                                                  | measure not operationalised |
| Sahu B, Chauhan S, Kiran U, Bisoi A, Lakshmy R, Selvaraj T, Nehra A. Neurocognitive function in patients undergoing coronary artery bypass graft surgery with cardiopulmonary bypass: The effect of two different rewarming strategies. <i>Journal of cardiothoracic and vascular anesthesia</i> . 2009;23:14-21                        | measure not operationalised |
| Saito A, Kumamaru H, Ono M, Miyata H, Motomura N. Propensity-matched analysis of a side-clamp versus an anastomosis assist device in cases of isolated coronary artery bypass grafting. <i>European journal of cardio-thoracic surgery : official journal of the European Association for Cardio-thoracic Surgery</i> . 2018;54:889-895 | measure not operationalised |
| Santana Santos F, Tadeu Velasco I. Clinical features in elderly patients submitted to coronary artery bypass graft (cabg). <i>Revista Brasileira de Medicina</i> . 2005;62:96-102                                                                                                                                                       | measure not operationalised |
| Schmidt R, Fazekas F, Offenbacher H, Machler H, Freidl W, Payer F, Rigler B, Harrison MIG, Lechner H. Brain magnetic resonance imaging in coronary artery bypass grafts: A pre- and postoperative assessment. <i>Neurology</i> . 1993;43:775-778                                                                                        | measure not operationalised |
| Schuch V, Moysidis T, Weiland D, Santosa F, Kroger K. Dementia and amputation. <i>Interventional Medicine &amp; Applied Science</i> . 2012;4:175-180                                                                                                                                                                                    | measure not operationalised |
| Schwarz N, Schoenburg M, Mollmann H, Kastaun S, Kaps M, Bachmann G, Sammer G, Hamm C, Walther T, Gerriets T. Cognitive decline and ischemic microlesions after coronary catheterization. A comparison to coronary artery bypass grafting. <i>American Heart Journal</i> . 2011;162:756-763                                              | measure not operationalised |
| Selnes O, Grega M, Bailey M, Pham L, Zeger S, Baumgartner W, McKhann G. Cognition 6 years after surgical or medical therapy for coronary artery disease. <i>Ann Neurol</i> . 2008;63:581-590                                                                                                                                            | measure not operationalised |
| Selnes O, Grega M, Borowicz L, Royall R, McKhann G, Baumgartner W. Cognitive changes with coronary artery disease: A prospective study of coronary artery bypass graft patients and nonsurgical controls. <i>Ann Thorac Surg</i> . 2003;75:1377-1384; discussion 1384                                                                   | measure not operationalised |
| Selnes OA, Grega MA, Bailey MM, Pham L, Zeger S, Baumgartner WA, McKhann GM. Neurocognitive outcomes 3 years after coronary artery bypass graft surgery: A controlled study. <i>The Annals of thoracic surgery</i> . 2007;84:1885-1896                                                                                                  | measure not operationalised |
| Selnes OA, Grega MA, Borowicz Jr LM, Barry S, Zeger S, Baumgartner WA, McKhann GM. Cognitive outcomes three years after coronary artery bypass surgery: A comparison of on-pump coronary artery bypass graft surgery and nonsurgical controls. <i>Annals of Thoracic Surgery</i> . 2005;79:1201-1209                                    | measure not operationalised |
| Selnes OA, Royall RM, Grega MA, Borowicz LM, Jr., Quaskey S, McKhann GM. Cognitive changes 5 years after coronary artery bypass grafting: Is there evidence of late decline? <i>Archives of neurology</i> . 2001;58:598-604                                                                                                             | measure not operationalised |
| Sendelbach S, Lindquist R, Watanuki S, Roman DD, Savik K. Early neurocognitive function of patients after off-pump coronary artery bypass surgery. <i>Heart &amp; lung : the journal of critical care</i> . 2005;34:367-374                                                                                                             | measure not operationalised |

|                                                                                                                                                                                                                                                                                                                    |                             |
|--------------------------------------------------------------------------------------------------------------------------------------------------------------------------------------------------------------------------------------------------------------------------------------------------------------------|-----------------------------|
| Shi Y, Wang W. Application of different anesthetic methods in coronary artery bypass grafting and the effect on postoperative outcome. <i>Experimental &amp; Therapeutic Medicine</i> . 2019;17:695-700                                                                                                            | measure not operationalised |
| Shroyer AL, Grover FL, Hattler B, Collins JF, McDonald GO, Kozora E, Lucke JC, Baltz JH, Novitzky D, Veterans Affairs Randomized On/Off Bypass Study G, et al. On-pump versus off-pump coronary-artery bypass surgery. <i>The New England journal of medicine</i> . 2009;361:1827-1837                             | measure not operationalised |
| Shroyer ALW, Hattler B, Wagner TH, Baltz JH, Collins JF, Carr BM, Almassi GH, Quin JA, Hawkins RB, Kozora E, et al. Comparing off-pump and on-pump clinical outcomes and costs for diabetic cardiac surgery patients. <i>Annals of Thoracic Surgery</i> . 2014;98:38-45                                            | measure not operationalised |
| Skrabal CA, Khosravi A, Westphal B, Steinhoff G, Liebold A. Effects of poly-2-methoxyethylacrylate (pmea)-coating on cpb circuits. <i>Scandinavian cardiovascular journal : SCJ</i> . 2006;40:224-229                                                                                                              | measure not operationalised |
| Srinivasan K, Ravikumar S, Chandra SR, Ganapathy S, Ravi GS. Cerebral and coronary vasculature in disease associations and dissociations in the south indian population. <i>Journal of Neurosciences in Rural Practice</i> . 2017;8:352-356                                                                        | measure not operationalised |
| Stamou SC, Bafi AS, Boyce SW, Pfister AJ, Dullum MKC, Hill PC, Zaki S, Garcia JM, Corso PJ. Coronary revascularization of the circumflex system: Different approaches and long-term outcome. <i>Annals of Thoracic Surgery</i> . 2000;70:1371-1377                                                                 | measure not operationalised |
| Stazka J, Szepietowska EM, Baranska E, Dudka P, Bedynska BSBBBBBDDEGGJ-RJJJKKKMP-ZRSSSSS. The cognitive functioning of patients with heart disease treated cardiosurgically-assessment before and after surgery. Preliminary study. <i>Psychiatria Polska</i> . 2012;46:757-768                                    | measure not operationalised |
| Stewart A, Katznelson R, Kraeva N, Carroll J, Pickworth T, Rao V, Djaiani G. Genetic variation and cognitive dysfunction one year after cardiac surgery. <i>Anaesthesia</i> . 2013;68:571-575                                                                                                                      | measure not operationalised |
| Stockard JJ, Bickford RG, Schauble JF. Pressure-dependent cerebral ischemia during cardiopulmonary bypass. <i>Neurology</i> . 1973;23:521-529                                                                                                                                                                      | measure not operationalised |
| Strauss B, Paulsen G, Strenge H, Graetz S, Regensburger D, Speidel H. Preoperative and late postoperative psychosocial state following coronary artery bypass surgery. <i>The Thoracic and cardiovascular surgeon</i> . 1992;40:59-64                                                                              | measure not operationalised |
| Stygall J, Newman SP, Fitzgerald G, Steed L, Mulligan K, Arrowsmith JE, Pugsley W, Humphries S, Harrison MJ. Cognitive change 5 years after coronary artery bypass surgery. <i>Health psychology : official journal of the Division of Health Psychology, American Psychological Association</i> . 2003;22:579-586 | measure not operationalised |
| Stygall J, Suvarna S, Harrington J, Hayward M, Walesby RK, Newman SP. Effect on the brain of two techniques of myocardial protection. <i>Asian Cardiovascular &amp; Thoracic Annals</i> . 2009;17:259-265                                                                                                          | measure not operationalised |
| Svenmarker S, Sandström E, Karlsson T, Jansson E, Häggmark S, Lindholm R, Appelblad M, Aberg T. Clinical effects of the heparin coated surface in cardiopulmonary bypass. <i>Eur J Cardiothorac Surg</i> . 1997;11:957-964                                                                                         | measure not operationalised |
| Szalma I, Kiss A, Kardos L, Horvath G, Nyitrai E, Tordai Z, Csiba L. Piracetam prevents cognitive decline in coronary artery bypass: A randomized trial versus placebo. <i>The Annals of thoracic surgery</i> . 2006;82:1430-1435                                                                                  | measure not operationalised |
| Tagarakis GI, Tsolaki-Tagaraki F, Tsolaki M, Diegeler A, Kazis D, Rouska E, Papassotiropoulos A. The role of soat-1 polymorphisms in cognitive decline and delirium after bypass heart surgery. <i>Clinical research in cardiology : official journal of the German Cardiac Society</i> . 2007;96:600-603          | measure not operationalised |
| Taggart DP, Browne SM, Halligan PW, Wade DT, Murkin JM. Is cardiopulmonary bypass still the cause of cognitive dysfunction after cardiac operations? <i>Journal of Thoracic and Cardiovascular Surgery</i> . 1999;118:414-421                                                                                      | measure not operationalised |
| Taggart DP, Browne SM, Wade DT, Halligan PW. Neuroprotection during cardiac surgery: A randomised trial of a platelet activating factor antagonist. <i>Heart (British Cardiac Society)</i> . 2003;89:897-900                                                                                                       | measure not operationalised |
| Tarasova IV, Volf NV, Trubnikova OA, Barbarash OL. Electroencephalogram changes in patients undergoing on-pump coronary artery bypass grafting. <i>Neuroscience and Behavioral Physiology</i> . 2013;43:577-581                                                                                                    | measure not operationalised |
| Trubnikova O, Tarasova I, Barbarash O. The influence of low and moderate carotid stenosis on neurophysiologic status of patients undergoing on-pump coronary artery bypass grafting. <i>Frontiers in neurology</i> . 2012;3:1                                                                                      | measure not operationalised |

|                                                                                                                                                                                                                                                                                                                  |                             |
|------------------------------------------------------------------------------------------------------------------------------------------------------------------------------------------------------------------------------------------------------------------------------------------------------------------|-----------------------------|
| Trubnikova OA, Tarasova IV, Artamonova AI, Syrova ID, Barbarash OL. Age as a risk factor for cognitive impairments in patients undergoing coronary bypass. <i>Neuroscience and Behavioral Physiology</i> . 2013;43:89-92                                                                                         | measure not operationalised |
| van den Goor JM, Saxby BK, Tijssen JG, Wesnes KA, de Mol BA, Nieuwland R. Improvement of cognitive test performance in patients undergoing primary cabg and other cpb-assisted cardiac procedures. <i>Perfusion</i> . 2008;23:267-273                                                                            | measure not operationalised |
| Vlahou A, Diplaris K, Ampatzidou F, Karagounnis L, Drossos G. The role of blood transfusion in the development of atrial fibrillation after coronary artery bypass grafting. <i>The Thoracic and cardiovascular surgeon</i> . 2016;64:688-692                                                                    | measure not operationalised |
| Walzer T, Herrmann M, Wallesch CW. Neuropsychological disorders after coronary bypass surgery. <i>Journal of neurology, neurosurgery, and psychiatry</i> . 1997;62:644-648                                                                                                                                       | measure not operationalised |
| Westaby S, Saatvedt K, White S, Katsumata T, van Oeveren W, Halligan PW. Is there a relationship between cognitive dysfunction and systemic inflammatory response after cardiopulmonary bypass? <i>The Annals of thoracic surgery</i> . 2001;71:667-672                                                          | measure not operationalised |
| Wimmer-Greinecker G, Matheis G, Brieden M, Dietrich M, Oremek G, Westphal K, Winkelmann BR, Moritz A. Neuropsychological changes after cardiopulmonary bypass for coronary artery bypass grafting. <i>The Thoracic and cardiovascular surgeon</i> . 1998;46:207-212                                              | measure not operationalised |
| Wittwer T, Sabashnikov A, Rahmanian PB, Choi Y-H, Zeriouh M, Mehler TO, Wahlers T. Less invasive coronary artery revascularization with a minimized extracorporeal circulation system: Preliminary results of a comparative study with off-pump-procedures. <i>Journal Of Cardiothoracic Surgery</i> . 2013;8:75 | measure not operationalised |
| Wu M-Y, Lee M-Y, Lin C-C, Chang Y-S, Tsai F-C, Lin P-J. Resuscitation of non-postcardiotomy cardiogenic shock or cardiac arrest with extracorporeal life support: The role of bridging to intervention. <i>Resuscitation</i> . 2012;83:976-981                                                                   | measure not operationalised |
| Wu M-Y, Tseng Y-H, Chang Y-S, Tsai F-C, Lin P-J. Using extracorporeal membrane oxygenation to rescue acute myocardial infarction with cardiopulmonary collapse: The impact of early coronary revascularization. <i>Resuscitation</i> . 2013;84:940-945                                                           | measure not operationalised |
| Yamamuro M, Lytle BW, Sapp SK, Cosgrove DM, 3rd, Loop FD, McCarthy PM. Risk factors and outcomes after coronary reoperation in 739 elderly patients. <i>The Annals of thoracic surgery</i> . 2000;69:464-474                                                                                                     | measure not operationalised |
| Yoda M, Nonoyama M, Shimakura T. Cerebral perfusion during off-pump coronary artery bypass grafting. <i>Surgery today</i> . 2004;34:501-505                                                                                                                                                                      | measure not operationalised |
| Zhai W, Liu J, Si Y, Han J. Changes in postoperative cognitive function during off-pump coronary artery bypass graft surgery: Dose response of propofol. <i>International Journal of Clinical and Experimental Medicine</i> . 2016;9:10939-10946                                                                 | measure not operationalised |
| Zhang TZ, Zhou J, Jin Q, Sun YJ, Diao YG, Zhang YN, Zhang Z. Protective effects of remifentanyl preconditioning on cerebral injury during pump-assisted coronary artery bypass graft. <i>Genetics and molecular research : GMR</i> . 2014;13:7658-7665                                                           | measure not operationalised |
| Zhang X, Schmitt FA, Caban-Holt AM, Ding X, Kryscio RJ, Abner E. Diabetes mitigates the role of memory complaint in predicting dementia risk: Results from the prevention of alzheimer's disease with vitamin e and selenium study. <i>Jpad</i> . 2017;4:143-148                                                 | measure not operationalised |
| Zhao G. Effect of continuous nursing intervention on rehabilitation after coronary artery bypass grafting in elderly patients with coronary heart disease. <i>Acta Medica Mediterranea</i> . 2019;35:467-473                                                                                                     | measure not operationalised |
| Zimpfer D, Czerny M, Kilo J, Kasimir M-T, Madl C, Kramer L, Wieselthaler GM, Wolner E, Grimm M. Cognitive deficit after aortic valve replacement. <i>The Annals of thoracic surgery</i> . 2002;74:407-412                                                                                                        | measure not operationalised |
| Anonymous. Two studies: Long-term cognitive decline after bypass surgery; alzheimer's gene linked to earlier bypass. <i>Comprehensive therapy</i> . 1999;25:300-301                                                                                                                                              | news article                |
| Agarwal R, Kalita J, Pandey S, Agarwal SK, Misra UK. Evaluation of cognitive function and p300 in patients undergoing cardiac surgery. <i>Electromyography and clinical neurophysiology</i> . 2010;50:259-264                                                                                                    | no CABG results             |
| Andrew MJ, Baker RA, Kneebone AC, Knight JL. Mood state as a predictor of neuropsychological deficits following cardiac surgery. <i>Journal of Psychosomatic Research</i> . 2000;48:537-546                                                                                                                      | no CABG results             |

|                                                                                                                                                                                                                                                                                                                                                                                                                                                                                           |                 |
|-------------------------------------------------------------------------------------------------------------------------------------------------------------------------------------------------------------------------------------------------------------------------------------------------------------------------------------------------------------------------------------------------------------------------------------------------------------------------------------------|-----------------|
| Arenson BG, MacDonald LA, Grocott HP, Hiebert BM, Arora RC. Effect of intensive care unit environment on in-hospital delirium after cardiac surgery. <i>The Journal of thoracic and cardiovascular surgery</i> . 2013;146:172-178                                                                                                                                                                                                                                                         | no CABG results |
| Atalan N, Efe Sevim M, Akgun S, Fazliogullari O, Basaran C. Morphine is a reasonable alternative to haloperidol in the treatment of postoperative hyperactive-type delirium after cardiac surgery. <i>Journal of cardiothoracic and vascular anesthesia</i> . 2013;27:933-938                                                                                                                                                                                                             | no CABG results |
| Baranyi A, Rothenhausler HB. The impact of s100b and persistent high levels of neuron-specific enolase on cognitive performance in elderly patients after cardiopulmonary bypass. <i>Brain Injury</i> . 2013;27:417-424                                                                                                                                                                                                                                                                   | no CABG results |
| Barber PA, Hach S, Tippett LJ, Ross L, Merry AF, Milsom P. Cerebral ischemic lesions on diffusion-weighted imaging are associated with neurocognitive decline after cardiac surgery. <i>Stroke</i> . 2008;39:1427-1433                                                                                                                                                                                                                                                                    | no CABG results |
| Bashein G, Townes B, Nessly M, Bledsoe S, Hornbein T, Davis K, Goldstein D, Coppel D. A randomized study of carbon dioxide management during hypothermic cardiopulmonary bypass. <i>Anesthesiology</i> . 1990;72:7-15                                                                                                                                                                                                                                                                     | no CABG results |
| Basile AM, Fusi C, Conti AA, Paniccia R, Trefoloni G, Pracucci G, Di Carlo A, Noferi D, Carbonetto F, Pretelli P, et al. S-100 protein and neuron-specific enolase as markers of subclinical cerebral damage after cardiac surgery: Preliminary observation of a 6-month follow-up study. <i>European neurology</i> . 2001;45:151-159                                                                                                                                                     | no CABG results |
| Bhudia SK, Cosgrove DM, Naugle RI, Rajeswaran J, Lam B-K, Walton E, Petrich J, Palumbo RC, Gillinov AM, Apperson-Hansen C, et al. Magnesium as a neuroprotectant in cardiac surgery: A randomized clinical trial. <i>The Journal of thoracic and cardiovascular surgery</i> . 2006;131:853-861                                                                                                                                                                                            | no CABG results |
| Bily B, Artemiou P, Sabol F, Bilecova-Rabajdova M, Kolarcik P, Torok P. The role of dexmedetomidine in the prevention of postoperative delirium in cardiac surgery patients. [slovak]. <i>Cardiology letters</i> . 2015;24:435-444                                                                                                                                                                                                                                                        | no CABG results |
| Breu A, Stransky M, Metterlein T, Werner T, Trabold B. Subsyndromal delirium after cardiac surgery. <i>Scandinavian Cardiovascular Journal</i> . 2015;49:207-212                                                                                                                                                                                                                                                                                                                          | no CABG results |
| Brown CHIV, Morrissey C, Ono M, Yenokyan G, Selnes OA, Walston J, Max L, LaFlam A, Neufeld K, Gottesman RF, et al. Impaired olfaction and risk of delirium or cognitive decline after cardiac surgery. <i>Journal of the American Geriatrics Society</i> . 2015;63:16-23                                                                                                                                                                                                                  | no CABG results |
| Brown CHt, Laflam A, Max L, Lyman D, Neufeld KJ, Tian J, Shah AS, Whitman GJ, Hogue CW. The impact of delirium after cardiac surgical procedures on postoperative resource use. <i>The Annals of thoracic surgery</i> . 2016;101:1663-1669                                                                                                                                                                                                                                                | no CABG results |
| Brown CHt, Probert J, Healy R, Parish M, Nomura Y, Yamaguchi A, Tian J, Zehr K, Mandal K, Kamath V, et al. Cognitive decline after delirium in patients undergoing cardiac surgery. <i>Anesthesiology</i> . 2018;129:406-416                                                                                                                                                                                                                                                              | no CABG results |
| Browndyke JN, Berger M, Harshbarger TB, Smith PJ, White W, Bisanar TL, Alexander JH, Gaca JG, Welsh-Bohmer K, Newman MF, et al. Resting-state functional connectivity and cognition after major cardiac surgery in older adults without preoperative cognitive impairment: Preliminary findings. <i>Journal of the American Geriatrics Society</i> . 2017;65:e6-e12                                                                                                                       | no CABG results |
| Browndyke JN, Moser DJ, Cohen RA, O'Brien DJ, Algina JJ, Haynes WG, Staples ED, Alexander J, Davies LK, Bauer RM. Acute neuropsychological functioning following cardiosurgical interventions associated with the production of intraoperative cerebral microemboli. <i>The Clinical neuropsychologist</i> . 2002;16:463-471                                                                                                                                                              | no CABG results |
| Burker EJ, Blumenthal JA, Feldman M, Thyrum E, Mahanna E, White W, Smith LR, Lewis J, Croughwell N, Schell R. The mini mental state exam as a predictor of neuropsychological functioning after cardiac surgery. <i>International Journal of Psychiatry in Medicine</i> . 1995;25:263-276                                                                                                                                                                                                 | no CABG results |
| Buziashvili II, Aleksakhina IA, Ambat'ello SG, Matskeplishvili ST. Use of cognitive evoked potentials p300 in diagnosis of affection of the higher mental functions after surgery on the heart in conditions of cardiopulmonary bypass. <i>Zhurnal nevrologii i psikiatrii imeni S.S. Korsakova / Ministerstvo zdravookhraneniia i meditsinskoi promyshlennosti Rossiiskoi Federatsii, Vserossiiskoe obshchestvo nevrologov [i] Vserossiiskoe obshchestvo psikiatrov</i> . 2005;105:51-54 | no CABG results |
| Carrascal Y, Casquero E, Gualis J, Di Stefano S, Florez S, Fulquet E, Echevarria JR, Fiz L. Cognitive decline after cardiac surgery: Proposal for easy measurement with a new test. <i>Interactive cardiovascular and thoracic surgery</i> . 2005;4:216-221                                                                                                                                                                                                                               | no CABG results |

|                                                                                                                                                                                                                                                                                                                                      |                 |
|--------------------------------------------------------------------------------------------------------------------------------------------------------------------------------------------------------------------------------------------------------------------------------------------------------------------------------------|-----------------|
| Cereghetti C, Siegemund M, Schaedelin S, Fassl J, Seeberger MD, Eckstein FS, Steiner LA, Goettel N. Independent predictors of the duration and overall burden of postoperative delirium after cardiac surgery in adults: An observational cohort study. <i>Journal of Cardiothoracic and Vascular Anesthesia</i> . 2017;31:1966-1973 | no CABG results |
| Chabot RJ, Gugino LD, Aglio LS, Maddi R, Cote W. Qeeg and neuropsychological profiles of patients after undergoing cardiopulmonary bypass surgical procedures. <i>Clinical EEG (electroencephalography)</i> . 1997;28:98-105                                                                                                         | no CABG results |
| Cheng H, Li Z, Young N, Boyd D, Atkins Z, Ji F, Liu H. The effect of dexmedetomidine on outcomes of cardiac surgery in elderly patients. <i>Journal of cardiothoracic and vascular anesthesia</i> . 2016;30:1502-1508                                                                                                                | no CABG results |
| Chuich T, Cropsey CL, Shi Y, Johnson D, Shotwell MS, Henson CP. Perioperative sedation in mechanically ventilated cardiac surgery patients with dexmedetomidine-based versus propofol-based regimens. <i>Annals of Pharmacotherapy</i> . 2019;53:5-12                                                                                | no CABG results |
| Cook DJ, Huston J, 3rd, Trenerry MR, Brown RD, Jr., Zehr KJ, Sundt TM, 3rd. Postcardiac surgical cognitive impairment in the aged using diffusion-weighted magnetic resonance imaging. <i>The Annals of thoracic surgery</i> . 2007;83:1389-1395                                                                                     | no CABG results |
| Croughwell ND, Newman MF, Blumenthal JA, White WD, Lewis JB, Frasco PE, Smith LR, Thyrum EA, Hurwitz BJ, Leone BJ. Jugular bulb saturation and cognitive dysfunction after cardiopulmonary bypass. <i>The Annals of thoracic surgery</i> . 1994;58:1702-1708                                                                         | no CABG results |
| de Vries AJ, Vermeijden WJ, van Pelt LJ, van den Heuvel ER, van Oeveren W. Additional filtering of blood from a cell salvage device is not likely to show important additional benefits in outcome in cardiac surgery. <i>Transfusion</i> . 2019;59:989-994                                                                          | no CABG results |
| Degirmenci B, Durak H, Hazan E, Karabay O, Derebek E, Yilmaz M, Ozbilek E, Oto O. The effect of coronary artery bypass surgery on brain perfusion. <i>Journal of nuclear medicine : official publication, Society of Nuclear Medicine</i> . 1998;39:587-591                                                                          | no CABG results |
| Di Carlo A, Perna AM, Pantoni L, Basile AM, Bonacchi M, Pracucci G, Trefoloni G, Bracco L, Sangiovanni V, Piccini C, et al. Clinically relevant cognitive impairment after cardiac surgery: A 6-month follow-up study. <i>Journal of the Neurological Sciences</i> . 2001;188:85-93                                                  | no CABG results |
| Diab MS, Bilkhu R, Soppa G, Edsell M, Fletcher N, Heiberg J, Royse C, Jahangiri M. The influence of prolonged intensive care stay on quality of life, recovery, and clinical outcomes following cardiac surgery: A prospective cohort study. <i>Journal of Thoracic and Cardiovascular Surgery</i> . 2018;156:1906-1915.e1903        | no CABG results |
| Eghtesadi-Araghi P, Sohrabpour A, Vahedi H, Saberi-Firoozi M. Halothane hepatitis in iran: A review of 59 cases. <i>World journal of gastroenterology</i> . 2008;14:5322-5326                                                                                                                                                        | no CABG results |
| Eifert S, Reichenspurner H, Pfefferkorn T, Baur B, von Schlippenbach C, Mayer TE, Hamann G, Reichart B. Neurological and neuropsychological examination and outcome after use of an intra-aortic filter device during cardiac surgery. <i>Perfusion</i> . 2003;18 Suppl 1:55-60                                                      | no CABG results |
| Eizadi-Mood N, Aghadavoudi O, Najarzagdegan MR, Fard MM. Prevalence of delirium in opium users after coronary artery bypass graft surgery. <i>International Journal of Preventive Medicine</i> . 2014;5:900-906                                                                                                                      | no CABG results |
| Eljezi V, Imhoff E, Bourdeaux D, Pereira B, Farhat M, Schoeffler P, Azarnoush K, Duale C. Bilateral sternal infusion of ropivacaine and length of stay in icu after cardiac surgery with increased respiratory risk a randomised controlled trial. <i>European Journal of Anaesthesiology</i> . 2017;34:56-65                        | no CABG results |
| Eljezi V, Imhoff E, Bourdeaux D, Pereira B, Farhat M, Schoeffler P, Azarnoush K, Duale C. Bilateral sternal infusion of ropivacaine and length of stay in icu after cardiac surgery with increased respiratory risk: A randomised controlled trial. <i>European Journal of Anaesthesiology</i> . 2017;34:56-65                       | no CABG results |
| Fontes MT, McDonagh DL, Phillips-Bute B, Welsby IJ, Podgoreanu MV, Fontes ML, Stafford-Smith M, Newman MF, Mathew JP. Arterial hyperoxia during cardiopulmonary bypass and postoperative cognitive dysfunction. <i>Journal of cardiothoracic and vascular anesthesia</i> . 2014;28:462-466                                           | no CABG results |
| Gandhi GY, Nuttall GA, Abel MD, Mullany CJ, Schaff HV, Williams BA, Schrader LM, Rizza RA, McMahan MM. Intraoperative hyperglycemia and perioperative outcomes in cardiac surgery patients. <i>Mayo Clinic proceedings</i> . 2005;80:862-866                                                                                         | no CABG results |
| Ganguly G, Dixit V, Patrikar S, Venkatraman R, Gorthi SP, Tiwari N. Carbon dioxide insufflation and neurocognitive outcome of open heart surgery. <i>Asian Cardiovascular and Thoracic Annals</i> . 2015;23:774-780                                                                                                                  | no CABG results |



|                                                                                                                                                                                                                                                                                                                                                                |                 |
|----------------------------------------------------------------------------------------------------------------------------------------------------------------------------------------------------------------------------------------------------------------------------------------------------------------------------------------------------------------|-----------------|
| Georgiadis D, Berger A, Kowatschev E, Lautenschlager C, Borner A, Lindner A, Schulte-Mattler W, Zerkowski HR, Zierz S, Deufel T. Predictive value of s-100beta and neuron-specific enolase serum levels for adverse neurologic outcome after cardiac surgery. <i>The Journal of thoracic and cardiovascular surgery</i> . 2000;119:138-147                     | no CABG results |
| Ghaffary S, Ghaeli P, Talasaz AH, Karimi A, Noroozian M, Salehiomran A, Jalali A. Effect of memantine on post-operative cognitive dysfunction after cardiac surgeries: A randomized clinical trial. <i>DARU, Journal of Pharmaceutical Sciences</i> . 2017;25 (1) (no pagination)                                                                              | no CABG results |
| Grieco G, d'Hollosy M, Culliford AT, Jonas S. Evaluating neuroprotective agents for clinical anti-ischemic benefit using neurological and neuropsychological changes after cardiac surgery under cardiopulmonary bypass. Methodological strategies and results of a double-blind, placebo-controlled trial of gm1 ganglioside. <i>Stroke</i> . 1996;27:858-874 | no CABG results |
| Grondin CM, Meere C, Castonguay Y, Grondin P, Lepage G. Cardiac surgery in the aged: A review of 120 cases. <i>Cardiovascular clinics</i> . 1971;2:233-245                                                                                                                                                                                                     | no CABG results |
| Gugino LD, Chabot RJ, Aglio LS, Aranki S, Dekkers R, Maddi R. Qeeg changes during cardiopulmonary bypass: Relationship to postoperative neuropsychological function. <i>Clinical EEG Electroencephalography</i> . 1999;30:53-63                                                                                                                                | no CABG results |
| Gugino LD, Chabot RJ, Aglio LS, Maddi R, Gosnell J, Aranki S. Qeeg and neuropsychological profiles of patients prior to undergoing cardiopulmonary bypass surgical procedures. <i>Clinical EEG (electroencephalography)</i> . 1997;28:87-97                                                                                                                    | no CABG results |
| Gunstad J, Benitez A, Hoth KF, Spitznagel MB, McCaffery J, McGeary J, Kakos LS, Poppas A, Paul RH, Jefferson AL, et al. P-selectin 1087g/a polymorphism is associated with neuropsychological test performance in older adults with cardiovascular disease. <i>Stroke</i> . 2009;40:2969-2972                                                                  | no CABG results |
| Harciarek M, Williamson JB, Biedunkiewicz B, Lichodziejewska-Niemierko M, Debska-Slizien A, Rutkowski B. Memory performance in adequately dialyzed patients with end-stage renal disease: Is there an association with coronary artery bypass grafting? <i>Journal of clinical and experimental neuropsychology</i> . 2010;32:881-889                          | no CABG results |
| Hayashi K, Oshima H, Shimizu M, Kobayashi K, Matsui S, Nishida Y, Usui A. Preoperative 6-minute walk distance is associated with postoperative cognitive dysfunction. <i>Annals of Thoracic Surgery</i> . 2018;106:505-512                                                                                                                                     | no CABG results |
| Herrmann M, Ebert AD, Galazky I, Wunderlich MT, Kunz WS, Huth C. Neurobehavioral outcome prediction after cardiac surgery: Role of neurobiochemical markers of damage to neuronal and glial brain tissue. <i>Stroke</i> . 2000;31:645-650                                                                                                                      | no CABG results |
| Hogue CW, Fucetola R, Hershey T, Freedland K, Davila-Roman VG, Goate AM, Thompson RE. Risk factors for neurocognitive dysfunction after cardiac surgery in postmenopausal women. <i>The Annals of thoracic surgery</i> . 2008;86:511-516                                                                                                                       | no CABG results |
| Hogue CW, Jr., Freedland K, Hershey T, Fucetola R, Nassief A, Barzilai B, Thomas B, Birge S, Dixon D, Schechtman KB, et al. Neurocognitive outcomes are not improved by 17beta-estradiol in postmenopausal women undergoing cardiac surgery. <i>Stroke</i> . 2007;38:2048-2054                                                                                 | no CABG results |
| Holinski S, Claus B, Alaaraj N, Dohmen PM, Neumann K, Uebelhack R, Konertz W. Cerebroprotective effect of piracetam in patients undergoing open heart surgery. <i>Annals of Thoracic and Cardiovascular Surgery</i> . 2011;17:137-142                                                                                                                          | no CABG results |
| Hudetz JA, Hoffmann RG, Patterson KM, Byrne AJ, Iqbal Z, Gandhi SD, Warltier DC, Pagel PS. Preoperative dispositional optimism correlates with a reduced incidence of postoperative delirium and recovery of postoperative cognitive function in cardiac surgical patients. <i>Journal of cardiothoracic and vascular anesthesia</i> . 2010;24:560-567         | no CABG results |
| Hudetz JA, Patterson KM, Iqbal Z, Gandhi SD, Pagel PS. Metabolic syndrome exacerbates short-term postoperative cognitive dysfunction in patients undergoing cardiac surgery: Results of a pilot study. <i>Journal of cardiothoracic and vascular anesthesia</i> . 2011;25:282-287                                                                              | no CABG results |
| Ille R, Lahousen T, Schweiger S, Hofmann P, Kapfhammer HP. Influence of patient-related and surgery-related risk factors on cognitive performance, emotional state, and convalescence after cardiac surgery. <i>Cardiovascular Revascularization Medicine</i> . 2007;8:166-169                                                                                 | no CABG results |
| Isgro F, Schmidt C, Pohl P, Saggau W. A predictive parameter in patients with brain related complications after cardiac surgery? <i>European journal of cardio-thoracic surgery : official journal of the European Association for Cardio-thoracic Surgery</i> . 1997;11:640-644                                                                               | no CABG results |

|                                                                                                                                                                                                                                                                                                                                                         |                 |
|---------------------------------------------------------------------------------------------------------------------------------------------------------------------------------------------------------------------------------------------------------------------------------------------------------------------------------------------------------|-----------------|
| Jacobs A, Neveling M, Horst M, Ghaemi M, Kessler J, Eichstaedt H, Rudolf J, Model P, Bonner H, de Vivie ER, et al. Alterations of neuropsychological function and cerebral glucose metabolism after cardiac surgery are not related only to intraoperative microembolic events. <i>Stroke</i> . 1998;29:660-667                                         | no CABG results |
| Jarvela K, Porkkala H, Karlsson S, Martikainen T, Selander T, Bendel S. Postoperative delirium in cardiac surgery patients. <i>Journal of Cardiothoracic and Vascular Anesthesia</i> . 2018;32:1597-1602                                                                                                                                                | no CABG results |
| Jenkins CD, Jono RT, Stanton B-A, Stroup-Benham CA. The measurement of health-related quality of life: Major dimensions identified by factor analysis. <i>Social Science &amp; Medicine</i> . 1990;31:925-931                                                                                                                                           | no CABG results |
| Ji F, Li Z, Nguyen H, Young N, Shi P, Fleming N, Liu H. Perioperative dexmedetomidine improves outcomes of cardiac surgery. <i>Circulation</i> . 2013;127:1576-1584                                                                                                                                                                                     | no CABG results |
| Jones RN, Rudolph JL, Inouye SK, Yang FM, Fong TG, Milberg WP, Tommet D, Metzger ED, Cupples LA, Marcantonio ER. Development of a unidimensional composite measure of neuropsychological functioning in older cardiac surgery patients with good measurement precision. <i>Journal of clinical and experimental neuropsychology</i> . 2010;32:1041-1049 | no CABG results |
| Jung P, Pereira MA, Hiebert B, Song X, Rockwood K, Tangri N, Arora RC. The impact of frailty on postoperative delirium in cardiac surgery patients. <i>Journal of Thoracic and Cardiovascular Surgery</i> . 2015;149:869                                                                                                                                | no CABG results |
| Kaukuntla H, Walker A, Harrington D, Jones T, Bonser RS, Study G. Differential brain and body temperature during cardiopulmonary bypass--a randomised clinical study. <i>European journal of cardio-thoracic surgery : official journal of the European Association for Cardio-thoracic Surgery</i> . 2004;26:571-579                                   | no CABG results |
| Kazmierski J, Kowman M, Banach M, Fendler W, Okonski P, Banys A, Jaszewski R, Rysz J, Mikhailidis DP, Sobow T, et al. Incidence and predictors of delirium after cardiac surgery: Results from the ipdacs study. <i>Journal of Psychosomatic Research</i> . 2010;69:179-185                                                                             | no CABG results |
| Khan E, Brieger D, Amerena J, Atherton JJ, Chew DP, Farshid A, Ilton M, Juergens CP, Kangaharan N, Rajaratnam R, et al. Differences in management and outcomes for men and women with st-elevation myocardial infarction. <i>Medical Journal of Australia</i> . 2018;209:118-123                                                                        | no CABG results |
| Kilminster S, Treasure T, McMillan T, Holt DW. Neuropsychological change and s-100 protein release in 130 unselected patients undergoing cardiac surgery. <i>Stroke</i> . 1999;30:1869-1874                                                                                                                                                             | no CABG results |
| Kim DH, Huybrechts KF, Patorno E, Marcantonio ER, Park Y, Levin R, Abdurrob A, Bateman BT. Adverse events associated with antipsychotic use in hospitalized older adults after cardiac surgery. <i>Journal of the American Geriatrics Society</i> . 2017;65:1229-1237                                                                                   | no CABG results |
| Kolkka R, Hilberman M. Neurologic dysfunction following cardiac operation with low-flow, low-pressure cardiopulmonary bypass. <i>The Journal of thoracic and cardiovascular surgery</i> . 1980;79:432-437                                                                                                                                               | no CABG results |
| Krzych LJ, Wybraniec MT, Krupka-Matuszczyk I, Skrzypek M, Bolkowska A, Wilczynski M, Bochenek AA. Detailed insight into the impact of postoperative neuropsychiatric complications on mortality in a cohort of cardiac surgery subjects: A 23,000-patient-year analysis. <i>Journal of cardiothoracic and vascular anesthesia</i> . 2014;28:448-457     | no CABG results |
| Lahariya S, Grover S, Bagga S, Sharma A. Delirium in patients admitted to a cardiac intensive care unit with cardiac emergencies in a developing country: Incidence, prevalence, risk factor and outcome. <i>General Hospital Psychiatry</i> . 2014;36:156-164                                                                                          | no CABG results |
| Lee A, Mu JL, Chiu CH, Gin T, Underwood MJ, Joynt GM. Effect of motor subtypes of delirium in the intensive care unit on fast-track failure after cardiac surgery. <i>Journal of Thoracic and Cardiovascular Surgery</i> . 2018;155:268-275.e261                                                                                                        | no CABG results |
| Lee J, Jung J, Noh J, Yoo S, Hong Y. Perioperative psycho-educational intervention can reduce postoperative delirium in patients after cardiac surgery: A pilot study. <i>International Journal of Psychiatry in Medicine</i> . 2013;45:143-158                                                                                                         | no CABG results |
| Mardani D, Bigdelian H. Prophylaxis of dexamethasone protects patients from further post-operative delirium after cardiac surgery: A randomized trial. <i>Journal of research in medical sciences : the official journal of Isfahan University of Medical Sciences</i> . 2013;18:137-143                                                                | no CABG results |
| Mardani D, Bigdelian H. The effect of dexamethasone prophylaxis on postoperative delirium after cardiac surgery: A randomized trial. <i>Journal of Research in Medical Sciences</i> . 2012;17:S113-s119                                                                                                                                                 | no CABG results |

|                                                                                                                                                                                                                                                                                                                                                                        |                 |
|------------------------------------------------------------------------------------------------------------------------------------------------------------------------------------------------------------------------------------------------------------------------------------------------------------------------------------------------------------------------|-----------------|
| Mathew J, Shernan S, White W, Fitch J, Chen J, Bell L, Newman M. Preliminary report of the effects of complement suppression with pexelizumab on neurocognitive decline after coronary artery bypass graft surgery. <i>Stroke</i> . 2004;35:2335-2339                                                                                                                  | no CABG results |
| Mathew JP, Fontes ML, Tudor IC, Ramsay J, Duke P, Mazer CD, Barash PG, Hsu PH, Mangano DT. A multicenter risk index for atrial fibrillation after cardiac surgery. <i>Journal of the American Medical Association</i> . 2004;291:1720-1729                                                                                                                             | no CABG results |
| Mathew JP, White WD, Schinderle DB, Podgoreanu MV, Berger M, Milano CA, Laskowitz DT, Stafford-Smith M, Blumenthal JA, Newman MF. Intraoperative magnesium administration does not improve neurocognitive function after cardiac surgery. <i>Stroke</i> . 2013;44:3407-3413                                                                                            | no CABG results |
| McDaid CM, Lewis SA, McMurray T, Phillips SA. Heart surgery: What are the neuropsychological consequences? Special Issue: Heart disease: The psychological challenge. 1994;15:110-125                                                                                                                                                                                  | no CABG results |
| Meybohm P, Renner J, Broch O, Caliebe D, Albrecht M, Cremer J, Haake N, Scholz J, Zacharowski K, Bein B. Postoperative neurocognitive dysfunction in patients undergoing cardiac surgery after remote ischemic preconditioning: A double-blind randomized controlled pilot study. <i>PloS one</i> . 2013;8:e64743                                                      | no CABG results |
| Mitchell SJ, Merry AF, Frampton C, Davies E, Grieve D, Mills BP, Webster CS, Milsom FP, Willcox TW, Gorman DF. Cerebral protection by lidocaine during cardiac operations: A follow-up study. <i>The Annals of thoracic surgery</i> . 2009;87:820-825                                                                                                                  | no CABG results |
| Moser DJ, Cohen RA, Clark MM, Aloia MS, Tate BA, Stefanik S, Forman DE, Tilkemeier PL. Neuropsychological functioning among cardiac rehabilitation patients. <i>Journal of cardiopulmonary rehabilitation</i> . 1999;19:91-97                                                                                                                                          | no CABG results |
| Mufti HN, Hirsch GM. Perioperative prediction of agitated (hyperactive) delirium after cardiac surgery in adults - the development of a practical scorecard. <i>Journal of Critical Care</i> . 2017;42:192-199                                                                                                                                                         | no CABG results |
| Nathan HJ, Munson J, Wells G, Mundi C, Balaa F, Wynands JE. The management of temperature during cardiopulmonary bypass: Effect on neuropsychological outcome. <i>Journal of Cardiac Surgery</i> . 1995;10:481-487                                                                                                                                                     | no CABG results |
| Nguyen Q, Uminski K, Hiebert BM, Tangri N, Arora RC. Midterm outcomes after postoperative delirium on cognition and mood in patients after cardiac surgery. <i>Journal of Thoracic &amp; Cardiovascular Surgery</i> . 2018;155:660-667.e662                                                                                                                            | no CABG results |
| Nussmeier NA, Miao Y, Roach GW, Wolman RL, Mora-Mangano C, Fox M, Szekely A, Tommasino C, Schwann NM, Mangano DT. Predictive value of the national institutes of health stroke scale and the mini-mental state examination for neurologic outcome after coronary artery bypass graft surgery. <i>Journal of Thoracic and Cardiovascular Surgery</i> . 2010;139:901-912 | no CABG results |
| Ogawa M, Izawa KP, Satomi-Kobayashi S, Tsuboi Y, Komaki K, Gotake Y, Sakai Y, Tanaka H, Okita Y. Impact of delirium on postoperative frailty and long term cardiovascular events after cardiac surgery. <i>PLoS ONE [Electronic Resource]</i> . 2017;12 (12) (no pagination)                                                                                           | no CABG results |
| O'Neal JB, Billings FT, Liu X, Shotwell MS, Liang Y, Shah AS, Ehrenfeld JM, Wanderer JP, Shaw AD. Effect of preoperative beta-blocker use on outcomes following cardiac surgery. <i>American Journal of Cardiology</i> . 2017;120:1293-1297                                                                                                                            | no CABG results |
| Osse RJ, Fekkes D, Tulen JHM, Wierdsma AI, Bogers AJJC, van der Mast RC, Hengeveld MW. High preoperative plasma neopterin predicts delirium after cardiac surgery in older adults. <i>Journal of the American Geriatrics Society</i> . 2012;60:661-668                                                                                                                 | no CABG results |
| Patel N, Horsfield MA, Banahan C, Janus J, Masters K, Morlese J, Egan V, Chung EML. Impact of perioperative infarcts after cardiac surgery. <i>Stroke</i> . 2015;46:680-686                                                                                                                                                                                            | no CABG results |
| Pesonen A, Suojaranta-Ylinen R, Hammarn E, Kontinen VK, Raivio P, Tarkkila P, Rosenberg PH. Pregabalin has an opioid-sparing effect in elderly patients after cardiac surgery: A randomized placebo-controlled trial. <i>British Journal of Anaesthesia</i> . 2011;106:873-881                                                                                         | no CABG results |
| Poole L, Ronaldson A, Kidd T, Leigh E, Jahangiri M, Steptoe A. Pre-operative cognitive functioning and inflammatory and neuroendocrine responses to cardiac surgery. <i>Annals of behavioral medicine : a publication of the Society of Behavioral Medicine</i> . 2016;50:545-553                                                                                      | no CABG results |
| Prakanrattana U, Prapaitrakool S. Efficacy of risperidone for prevention of postoperative delirium in cardiac surgery. <i>Anaesthesia and intensive care</i> . 2007;35:714-719                                                                                                                                                                                         | no CABG results |

|                                                                                                                                                                                                                                                                                                                                                      |                 |
|------------------------------------------------------------------------------------------------------------------------------------------------------------------------------------------------------------------------------------------------------------------------------------------------------------------------------------------------------|-----------------|
| Ramlawi B, Otu H, Rudolph JL, Mieno S, Kohane IS, Can H, Libermann TA, Marcantonio ER, Bianchi C, Sellke FW. Genomic expression pathways associated with brain injury after cardiopulmonary bypass. <i>The Journal of thoracic and cardiovascular surgery</i> . 2007;134:996-1005                                                                    | no CABG results |
| Ramlawi B, Rudolph JL, Mieno S, Feng J, Boodhwani M, Khabbaz K, Levkoff SE, Marcantonio ER, Bianchi C, Sellke FW. C-reactive protein and inflammatory response associated to neurocognitive decline following cardiac surgery. <i>Surgery</i> . 2006;140:221-226                                                                                     | no CABG results |
| Ramlawi B, Rudolph JL, Mieno S, Khabbaz K, Sodha NR, Boodhwani M, Levkoff SE, Marcantonio ER, Sellke FW. Serologic markers of brain injury and cognitive function after cardiopulmonary bypass. <i>Annals of surgery</i> . 2006;244:593-601                                                                                                          | no CABG results |
| Rasmussen LA, Ryhammer PK, Greisen J, Bhavsar RR, Lorentzen A-G, Jakobsen C-J. Ultrashort acting remifentanyl is not superior to long-acting sufentanil in preserving cognitive function-a randomized study. <i>Journal of Clinical Anesthesia</i> . 2016;33:127-134                                                                                 | no CABG results |
| Regragui I, Birdi I, Izzat MB, Black AM, Lopatzidis A, Day CJ, Gardner F, Bryan AJ, Angelini GD. The effects of cardiopulmonary bypass temperature on neuropsychologic outcome after coronary artery operations: A prospective randomized trial. <i>The Journal of thoracic and cardiovascular surgery</i> . 1996;112:1036-1045                      | no CABG results |
| Richebe P, Picard W, Rivat C, Jelacic S, Branchard O, Leproust S, Cahana A, Janvier G. Effects of nefopam on early postoperative hyperalgesia after cardiac surgery. <i>Journal of cardiothoracic and vascular anesthesia</i> . 2013;27:427-435                                                                                                      | no CABG results |
| Rogers CA, Stoica S, Ellis L, Stokes EA, Wordsworth S, Dabner L, Clayton G, Downes R, Nicholson E, Bennett S, et al. Randomized trial of near-infrared spectroscopy for personalized optimization of cerebral tissue oxygenation during cardiac surgery. <i>British Journal of Anaesthesia</i> . 2017;119:384-393                                    | no CABG results |
| Ropacki SA, Patel SM, Hartman RE. Pomegranate supplementation protects against memory dysfunction after heart surgery: A pilot study. <i>Evidence-based complementary and alternative medicine : eCAM</i> . 2013;2013:932401                                                                                                                         | no CABG results |
| Rosengart T, Sweet J, Finnin E, Wolfe P, Cashy J, Hahn E, Marymont J, Sanborn T. Neurocognitive functioning in patients undergoing coronary artery bypass graft surgery or percutaneous coronary intervention: Evidence of impairment before intervention compared with normal controls. <i>Ann Thorac Surg</i> . 2005;80:1327-1334; discussion 1334 | no CABG results |
| Rothenshuler H-B, Grieser B, Nollert G, Reichart B, Schelling G, Kapfhammer H-P. Psychiatric and psychosocial outcome of cardiac surgery with cardiopulmonary bypass: A prospective 12-month follow-up study. <i>General Hospital Psychiatry</i> . 2005;27:18-28                                                                                     | no CABG results |
| Rudolph JL, Inouye SK, Jones RN, Yang FM, Fong TG, Levkoff SE, Marcantonio ER. Delirium: An independent predictor of functional decline after cardiac surgery. <i>Journal of the American Geriatrics Society</i> . 2010;58:643-649                                                                                                                   | no CABG results |
| Saczynski JS, Marcantonio ER, Quach L, Fong TG, Gross A, Inouye SK, Jones RN. Cognitive trajectories after postoperative delirium. <i>The New England journal of medicine</i> . 2012;367:30-39                                                                                                                                                       | no CABG results |
| Sakurai M, Takahara Y, Takeuchi S, Mogi K. Cognitive dysfunction following cardiovascular surgery. <i>The Japanese journal of thoracic and cardiovascular surgery : official publication of the Japanese Association for Thoracic Surgery = Nihon Kyobu Geka Gakkai zasshi</i> . 2005;53:251-254                                                     | no CABG results |
| Salzwedel A, Heidler MD, Meng K, Schikora M, Wegscheider K, Reibis R, Voller H. Impact of cognitive performance on disease-related knowledge six months after multi-component rehabilitation in patients after an acute cardiac event. <i>European Journal of Preventive Cardiology</i> . 2019;26:46-55                                              | no CABG results |
| Savageau JA, Stanton BA, Jenkins CD, Frater RWM. Neuropsychological dysfunction following elective cardiac operation. II. A six-month reassessment. <i>Journal of Thoracic and Cardiovascular Surgery</i> . 1982;84:595-600                                                                                                                          | no CABG results |
| Savageau JA, Stanton BA, Jenkins CD, Klein MD. Neuropsychological dysfunction following elective cardiac operation. I. Early assessment. <i>The Journal of thoracic and cardiovascular surgery</i> . 1982;84:585-594                                                                                                                                 | no CABG results |
| Schoen J, Husemann L, Tiemeyer C, Lueloh A, Sedemund-Adib B, Berger KU, Hueppe M, Heringlake M. Cognitive function after sevoflurane- vs propofol-based anaesthesia for on-pump cardiac surgery: A randomized controlled trial. <i>British Journal of Anaesthesia</i> . 2011;106:840-850                                                             | no CABG results |
| Schricker T, Sato H, Beaudry T, Codere T, Hatzakorzian R, Pruessner JC. Intraoperative maintenance of normoglycemia with insulin and glucose preserves verbal learning after cardiac surgery. <i>PloS one</i> . 2014;9:no pagination                                                                                                                 | no CABG results |

|                                                                                                                                                                                                                                                                                                                                                 |                 |
|-------------------------------------------------------------------------------------------------------------------------------------------------------------------------------------------------------------------------------------------------------------------------------------------------------------------------------------------------|-----------------|
| Selnes OA, Grega MA, Bailey MM, Pham LD, Zeger SL, Baumgartner WA, McKhann GM. Do management strategies for coronary artery disease influence 6-year cognitive outcomes? <i>The Annals of thoracic surgery</i> . 2009;88:445-454                                                                                                                | no CABG results |
| Shadvar K, Baastani F, Mahmoodpoor A, Bilehjani E. Evaluation of the prevalence and risk factors of delirium in cardiac surgery icu. <i>Journal of Cardiovascular and Thoracic Research</i> . 2013;5:157-161                                                                                                                                    | no CABG results |
| Shehabi Y, Grant P, Wolfenden H, Hammond N, Bass F, Campbell M, Chen J. Prevalence of delirium with dexmedetomidine compared with morphine based therapy after cardiac surgery: A randomized controlled trial (dexmedetomidine compared to morphine-dexcom study). <i>Anesthesiology</i> . 2009;111:1075-1084                                   | no CABG results |
| Shioiri A, Kurumaji A, Takeuchi T, Nemoto K, Arai H, Nishikawa T. A decrease in the volume of gray matter as a risk factor for postoperative delirium revealed by an atlas-based method. <i>American Journal of Geriatric Psychiatry</i> . 2016;24:528-536                                                                                      | no CABG results |
| Skoloudik D, Hurtikova E, Brat R, Herzig R. Sonolysis in prevention of brain infarction during cardiac surgery (sonorescue). <i>Medicine (United States)</i> . 2016;95:no pagination                                                                                                                                                            | no CABG results |
| Smulter N, Lingehall HC, Gustafson Y, Olofsson B, Engstrom KG, Appelblad M, Svenmarker S. Disturbances in oxygen balance during cardiopulmonary bypass: A risk factor for postoperative delirium. <i>Journal of Cardiothoracic and Vascular Anesthesia</i> . 2018;32:684-690                                                                    | no CABG results |
| Snyder-Ramos SA, Gruhlke T, Bauer H, Bauer M, Luntz AP, Motsch J, Martin E, Vahl CF, Missler U, Wiesmann M, et al. Cerebral and extracerebral release of protein s100b in cardiac surgical patients. <i>Anaesthesia</i> . 2004;59:344-349                                                                                                       | no CABG results |
| Soehle M, Dittmann A, Ellerkmann RK, Baumgarten G, Putensen C, Guenther U. Intraoperative burst suppression is associated with postoperative delirium following cardiac surgery: A prospective, observational study. <i>BMC Anesthesiology</i> . 2015;15:no pagination                                                                          | no CABG results |
| Sponholz C, Schuwirth C, Koenig L, Hoyer H, Coldewey SM, Schelenz C, Doenst T, Kortgen A, Bauer M. Intraoperative reduction of vasopressors using processed electroencephalographic monitoring in patients undergoing elective cardiac surgery: A randomized clinical trial. <i>Journal of Clinical Monitoring &amp; Computing</i> . 2019;19:19 | no CABG results |
| Susheela AT, Packiasabapathy S, Gasangwa DV, Patxot M, O'Neal J, Marcantonio E, Subramaniam B. The use of dexmedetomidine and intravenous acetaminophen for the prevention of postoperative delirium in cardiac surgery patients over 60 years of age: A pilot study. <i>F1000Research</i> . 2017;6:1842                                        | no CABG results |
| Svensson LG, Nadolny EM, Penney DL, Jacobson J, Kimmel WA, Entrup MH, D'Agostino RS. Prospective randomized neurocognitive and s-100 study of hypothermic circulatory arrest, retrograde brain perfusion, and antegrade brain perfusion for aortic arch operations. <i>Annals of Thoracic Surgery</i> . 2001;71:1905-1912                       | no CABG results |
| Tan MC, Felde A, Kuskowski M, Ward H, Kelly RF, Adabag AS, Dysken M. Incidence and predictors of post-cardiotomy delirium. <i>American Journal of Geriatric Psychiatry</i> . 2008;16:575-583                                                                                                                                                    | no CABG results |
| Tardiff BE, Newman MF, Saunders AM, Strittmatter WJ, Blumenthal JA, White WD, Croughwell ND, Davis Jr RD, Roses AD, Reves JG. Preliminary report of a genetic basis for cognitive decline after cardiac operations. <i>Annals of Thoracic Surgery</i> . 1997;64:715-720                                                                         | no CABG results |
| ten Broeke M, Koster S, Konings T, Hensens AG, van der Palen J. Can we predict a delirium after cardiac surgery? A validation study of a delirium risk checklist. <i>European Journal of Cardiovascular Nursing</i> . 2018;17:255-261                                                                                                           | no CABG results |
| Terazawa S, Oshima H, Narita Y, Fujimoto K, Mutsuga M, Tokuda Y, Yoshizumi T, Ito H, Uchida W, Usui A. Strategy of cardiovascular surgery for patients with dementia as evaluated by mini-mental state examination. <i>Circulation Journal</i> . 2018;82:2998-3004                                                                              | no CABG results |
| Townes BD, Bashein G, Hornbein TF, Coppel DB, Goldstein DE, Davis KB, Nessly ML, Bledsoe SW, Veith RC, Ivey TD, et al. Neurobehavioral outcomes in cardiac operations. A prospective controlled study. <i>Journal of Thoracic and Cardiovascular Surgery</i> . 1989;98:774-782                                                                  | no CABG results |
| Trubnikova OA, Tarasova IV, Syrova ID, Mamontova AS, Kovalenko AV, Barbarash OL, Barbarash LS. Neuropsychological status of patients with minor and moderate carotid artery stenosis undergoing coronary bypass. <i>Neuroscience and Behavioral Physiology</i> . 2014;44:625-630                                                                | no CABG results |
| Tse L, Schwarz SKW, Bowering JB, Moore RL, Barr AM. Incidence of and risk factors for delirium after cardiac surgery at a quaternary care center: A retrospective cohort study. <i>Journal of cardiothoracic and vascular anesthesia</i> . 2015;29:1472-1479                                                                                    | no CABG results |

|                                                                                                                                                                                                                                                                                                               |                 |
|---------------------------------------------------------------------------------------------------------------------------------------------------------------------------------------------------------------------------------------------------------------------------------------------------------------|-----------------|
| Uebelhack R, Vohs K, Zytowski M, Schewe HJ, Koch C, Konertz W. Effect of piracetam on cognitive performance in patients undergoing bypass surgery. <i>Pharmacopsychiatry</i> . 2003;36:89-93                                                                                                                  | no CABG results |
| Uysal S, Mazzeffi M, Lin HM, Fischer GW, Griep RB, Adams DH, Reich DL. Internet-based assessment of postoperative neurocognitive function in cardiac and thoracic aortic surgery patients. <i>Journal of Thoracic and Cardiovascular Surgery</i> . 2011;141:777-781                                           | no CABG results |
| Vedel AG, Holmgaard F, Siersma V, Langkilde A, Paulson OB, Ravn HB, Nilsson JC, Rasmussen LS. Domain-specific cognitive dysfunction after cardiac surgery. A secondary analysis of a randomized trial. <i>Acta Anaesthesiologica Scandinavica</i> . 2019;19:19                                                | no CABG results |
| Veliz-Reissmuller G, Torres HA, Van der Linden J, Lindblom D, Jonhagen ME. Pre-operative mild cognitive dysfunction predicts risk for post-operative delirium after elective cardiac surgery. <i>Aging - Clinical and Experimental Research</i> . 2007;19:172-177                                             | no CABG results |
| Vingerhoets G, de Soete G, Jannes C. Subjective complaints versus neuropsychological test performance after cardiopulmonary bypass. <i>Journal of Psychosomatic Research</i> . 1995;39:843-853                                                                                                                | no CABG results |
| Vingerhoets G, Jannes C, De Soete G, Van Nooten G. Prospective evaluation of verbal memory performance after cardiopulmonary bypass surgery. <i>Journal of clinical and experimental neuropsychology</i> . 1996;18:187-196                                                                                    | no CABG results |
| Vingerhoets G, Van Nooten G, Jannes C. Effect of asymptomatic carotid artery disease on cognitive outcome after cardiopulmonary bypass. <i>Journal of the International Neuropsychological Society : JINS</i> . 1996;2:236-239                                                                                | no CABG results |
| Wanat M, Fitousis K, Boston F, Masud F. Comparison of dexmedetomidine versus propofol for sedation in mechanically ventilated patients after cardiovascular surgery. <i>Methodist DeBakey cardiovascular journal</i> . 2014;10:111-117                                                                        | no CABG results |
| Whitlock RP, Devereaux PJ, Teoh KH, Lamy A, Vincent J, Pogue J, Paparella D, Sessler DI, Karthikeyan G, Villar JC, et al. Methylprednisolone in patients undergoing cardiopulmonary bypass (sirs): A randomised, double-blind, placebo-controlled trial. <i>The Lancet</i> . 2015;386:1243-1253               | no CABG results |
| Willner AE, Rabiner CJ, Wisoff BG, Fishman J, Rosen B, Hartstein M, Klein DF. Analogy tests and psychopathology at follow-up after open heart surgery. <i>Biological psychiatry</i> . 1976;11:687-696                                                                                                         | no CABG results |
| Willner AE, Rabiner CJ. Psychopathology and cognitive dysfunction five years after open-heart surgery. <i>Comprehensive psychiatry</i> . 1979;20:409-418                                                                                                                                                      | no CABG results |
| Zhang W, Sun Y, Liu Y, Qiu W, Ye X, Zhang G, Zhang L. A nursing protocol targeting risk factors for reducing postoperative delirium in patients following coronary artery bypass grafting: Results of a prospective before-after study. <i>International Journal of Nursing Sciences</i> . 2017:no pagination | no CABG results |
| Zhang X, Yan X, Gorman J, Hoffman SN, Zhang L, Boscarino JA. Perioperative hyperglycemia is associated with postoperative neurocognitive disorders after cardiac surgery. <i>Neuropsychiatric disease and treatment</i> . 2014;10:361-370                                                                     | no CABG results |
| Abdallah I, Ayad AE, Afifi W, Amin ME. Lidocaine versus magnesium infusion for cerebral protection during cardiopulmonary bypass. <i>Egyptian Journal of Anaesthesia</i> . 2003;19:195-204                                                                                                                    | no full text    |
| Bi Q, Zhang WW, Li JY, Wu H. Relationship between impaired baseline cerebral perfusion and cognitive dysfunction after off-pump coronary artery bypass grafting. <i>Experimental and Clinical Cardiology</i> . 2014;20:497-516                                                                                | no full text    |
| Brusa G, Montano V, Raiteri U, Rissotto R, Grasso MA, Pergolo A, Crosetti S, Ottonello GA. Tcd monitoring in subjects submitted to aorto-coronary by-pass: Correlations with cognitive impairment. <i>Rivista di Neurobiologia</i> . 1997;43:109-114                                                          | no full text    |
| Capdeville M, Lee JH. Off-pump coronary artery bypass surgery and anesthesia. <i>Progress in Anesthesiology</i> . 2003;17:163-179                                                                                                                                                                             | no full text    |
| Newman MF, Croughwell ND, Blumenthal JA, White WD, Lewis JB, Smith LR, Frasco P, Towner EA, Schell RM, Hurwitz BJ, et al. Effect of aging on cerebral autoregulation during cardiopulmonary bypass: Association with postoperative cognitive dysfunction. <i>Circulation</i> . 1994;90:II243-II249            | no full text    |
| Zwolinski R, Marcinkiewicz A, Kedzia K, Susik M, Ostrowski S, Jaszewski R. Delirium after surgical myocardial revascularization- identifying the target patients. <i>Experimental and Clinical Cardiology</i> . 2014;20:145-154                                                                               | no full text    |

|                                                                                                                                                                                                                                                                                                                |                |
|----------------------------------------------------------------------------------------------------------------------------------------------------------------------------------------------------------------------------------------------------------------------------------------------------------------|----------------|
| Akgul Erdil F, Durak P, Iyican D, Erdemli O, Kapadar H, Karakas S, Emir M, Sener E. Does fast-track anesthesia technique have advantage on the short term memory functions and depression in coronary artery bypass surgery? <i>Gogus-Kalp-Damar Anestezi ve Yogun Bakim Dernegi Dergisi</i> . 2004;10:111-116 | not in english |
| Alekseevich GY, Rodikov MV, Marchenko AV, Myalyuk PA, Alekseevich GV. An analysis of postoperative cognitive dysfunction in different methods of coronary artery bypass. [russian]. <i>Zhurnal Nevrologii i Psihiatrii imeni S.S.</i> 2017;Korsakova. 117:16-20                                                | not in english |
| Argunova YA, Trubnikova OA, Mamontova AS, Syrova ID, Kuhareva IN, Maleva OV, Barbarash OL. The influence of three-week aerobic exercise program on neurodynamic parameters of patients underwent coronary bypass grafting. <i>Russian Journal of Cardiology</i> . 2016;130:30-36                               | not in english |
| Asenbaum S, Zeitlhofer J, Spiss C, Wolner E, Deecke L. [neurologic and psychiatric complications after heart surgery]. <i>Neurologische und psychiatrische Komplikationen nach Herzoperationen</i> . 1991;69:368-373                                                                                           | not in english |
| Bagheri K, Honarmand A, Hosseini-Moosa SJ. Association of mean arterial pressure during cardiopulmonary pump and incidence of delirium after coronary artery bypass graft surgery. [persian]. <i>Journal of Isfahan Medical School</i> . 2017;35:1358-1363                                                     | not in english |
| Bagheri K, Motamedi O, Aghadavoudi O, Akbari M. The effects of mean arterial pressure during cardiopulmonary bypass on clinical and paraclinical parameters during and after coronary artery bypass graft surgery. <i>Journal of Isfahan Medical School</i> . 2012;29:no pagination                            | not in english |
| Benetis R, Girdauskas E, Kinduris S. Neuropsychological outcomes after coronary artery bypass grafting. <i>Medicina (Kaunas, Lithuania)</i> . 2004;40 Suppl 1:30-34                                                                                                                                            | not in english |
| Benetis R, Kinduris S, Girdauskas E, Ereminiene E. Central nervous system complications after coronary artery bypass grafting. <i>Medicina (Kaunas, Lithuania)</i> . 2002;38 Suppl 2:247-250                                                                                                                   | not in english |
| Bi Q, Li Q, Zhang ZQ, Gu CX, Ma XH. A study of neurological complications after coronary artery bypass grafting. <i>Zhonghua nei ke za zhi [Chinese journal of internal medicine]</i> . 2008;47:202-205                                                                                                        | not in english |
| Boning A, Bein B, Dirksen C, Carstensen S, Friedrich C, Hedderich J, Cremer J. The use of a sutureless anastomotic system for aortic vein graft anastomoses does not lead to an improvement in neuropsychological outcome. <i>Zeitschrift fur Herz-, Thorax- und Gefasschirurgie</i> . 2004;18:281-289         | not in english |
| Caldas J, Panerai RB, Robinson TG, Camara L, Ferreira G, Borg-Seng-Shu E, De Lima Oliveira M, Mian NC, Santos L, Nogueira R, et al. Impaired dynamic cerebral autoregulation after coronary artery bypass grafting and association with postoperative delirium. <i>Critical Care</i> . 2016;20:no pagination   | not in english |
| Cao L, Li Q, Bi Q. [neurologic injury after off-pump coronary artery bypass grafting in elder patients with a history of cerebral infarction]. <i>Zhonghua nei ke za zhi [Chinese journal of internal medicine]</i> . 2011;50:201-204                                                                          | not in english |
| Chernov VI, Efimova NI, Efimova II, Akhmedov SD, Lishmanov IB. Central hemodynamic and cognitive function in the short- and long-term periods after coronary bypass grafting. <i>Angiologiya i sosudistaia khirurgiya = Angiology and vascular surgery</i> . 2004;10:114-124                                   | not in english |
| Chernov VI, Efimova NI, Efimova II, Akhmedov SD, Lishmanov IB. Scintigraphic evaluation of cerebral circulation in prognosis of cerebrovascular complications of coronary artery bypass grafting. <i>Klinicheskaya Meditsina</i> . 2009;87:33-37                                                               | not in english |
| Chugunova YV, Chumakova GA, Ermolin PA, Baranov AS. The influence of visceral obesity on cognition in patients after coronary artery bypass surgery. <i>Russian Journal of Cardiology</i> . 2016;132:19-24                                                                                                     | not in english |
| Colak A, Arar C, Turan E, Soker A, Kargi M, Gunday I, Turan N. The effect of normal and low hematocrit levels on cognitive functions during cardiopulmonary bypass. <i>Gogus-Kalp-Damar Anestezi ve Yogun Bakim Dernegi Dergisi</i> . 2008;14:119-125                                                          | not in english |
| Cui QT, Fu QL, Han PL, Zhang J. Risk factors of cognitive impairment after off-pump coronary artery bypass grafting. <i>Chinese Journal of Cardiology</i> . 2012;40:104-107                                                                                                                                    | not in english |
| Durmus M, Karaaslan K, But AK, Toprak HI, Teksan H, Ersoy MO. The effects of acute normovolemic hemodilution on postoperative cognitive functions in coronary artery bypass surgery. <i>Gogus-Kalp-Damar Anestezi ve Yogun Bakim Dernegi Dergisi</i> . 2003;9:119-123                                          | not in english |
| Efimova N, Chernov V, Efimova I, Akhmedov S, Lishmanov Y. [changes in cerebral blood flow and cognitive function in patients undergoing coronary bypass surgery with cardiopulmonary bypass]. <i>Kardiologiya</i> . 2015;55:40-46                                                                              | not in english |

|                                                                                                                                                                                                                                                                                                                                                                                                                                           |                |
|-------------------------------------------------------------------------------------------------------------------------------------------------------------------------------------------------------------------------------------------------------------------------------------------------------------------------------------------------------------------------------------------------------------------------------------------|----------------|
| Efimova NI, Chernov VI, Efimova II, Akhmedov SD, Podoksenov IK, Lishmanov IB. Pharmacological prevention of cerebrovascular complications in cardiac patients after coronary artery bypass surgery. Zhurnal nevrologii i psikiatrii imeni S.S. Korsakova / Ministerstvo zdravookhraneniia i meditsinskoi promyshlennosti Rossiiskoi Federatsii, Vserossiiskoe obshchestvo nevrologov [i] Vserossiiskoe obshchestvo psikiatrov. 2003;58-63 | not in english |
| Ge Y, Ma Z, Shi H, Zhao Y, Gu X, Wei H. [incidence and risk factors of postoperative cognitive dysfunction in patients underwent coronary artery bypass grafting surgery]. Zhong Nan da Xue Xue Bao. Yi Xue Ban = Journal of Central South University. Medical Sciences. 2014;39:1049-1055                                                                                                                                                | not in english |
| Ge Y, Shi H, Zhu W, Ma ZL, Wei H, Gu X, Bao H. Effects of ulinastatin on cognitive function in patients with coronary artery bypass grafting. Zhejiang da xue xue bao. Yi xue ban = Journal of Zhejiang University. Medical sciences. 2015;44:532-538                                                                                                                                                                                     | not in english |
| Goksu S, Kocoglu H, Daglar B, Ustunsoy H, Celkan MA, Kazaz H, Uyar A, Oner U. Early postoperative period in coronary revascularization: Comparison of on-pump and off-pump techniques. Gogus-Kalp-Damar Anestezi ve Yogun Bakim Dernegi Dergisi. 2003;9:162-166                                                                                                                                                                           | not in english |
| Gorna R, Kiejna A. Assessment of short-term neuropsychologic changes after normothermic versus hypothermic coronary artery bypass grafting. Archives of Psychiatry and Psychotherapy. 2003;5:31-43                                                                                                                                                                                                                                        | not in english |
| Gorna R, Kustrzycki W, Kiejna A, Rymaszewska J. Assessment of short-term neuropsychologic changes after normothermic versus hypothermic coronary artery bypass grafting. Psychiatria Polska. 2001;35:781-795                                                                                                                                                                                                                              | not in english |
| Goruleva MV, Ganenko OS, Kovaltsova RS, Kutuzova A, Petrova NN, Demchemnko EA, Nedoshivin AO. Quality of life and psycho-cognitive condition in patients after coronary artery bypass graft surgery. Russian Journal of Cardiology. 2014;113:68-71                                                                                                                                                                                        | not in english |
| Hamada H, Kuroda M, Nakanuno R, Kawamoto M. Changes in serum s-100 beta protein and mini-mental state examination in patients undergoing coronary artery bypass grafting or valve replacement surgery. Anesthesia and Resuscitation. 2007;43:47-50                                                                                                                                                                                        | not in english |
| Hamada H, Kuroda M, Nakanuno R, Kawamoto M. Orbital ultrasound monitoring during cardiopulmonary bypass - relevance to postoperative neurocognitive outcome. Anesthesia and Resuscitation. 2007;43:67-71                                                                                                                                                                                                                                  | not in english |
| Ieva N, Samalavicius R, Misiuriene I, Valaikiene J, Baublys A, Uzdavinys G. [disorders of neurocognitive function after coronary artery bypass grafting]. Pooperacines neurokognityvines disfunkcijos daznis po miokardo revaskulizavimo operaciju. 2004;40 Suppl 1:66-69                                                                                                                                                                 | not in english |
| Jensen BO, Hughes P, Rasmussen LS, Pedersen PU, Steinbruchel DA. Cognitive functions in elderly high-risk patients after off-pump coronary artery bypass grafting versus conventional bypass grafting - a randomised study - secondary publication. Ugeskrift for Laeger. 2006;168:3820-3822                                                                                                                                              | not in english |
| Kamenskaya OV, Klinkova AS, Meshkov IO, Lomivorotov VV, Cherniavsky AM. Predictors of cardiorespiratory complications in patients with ischemic heart disease after coronary artery bypass grafting. [russian]. Kardiologiya. 2017;57:5-9                                                                                                                                                                                                 | not in english |
| Kertsman VP, Kuperberg EB, Mergasov AG, Sonkin VG, Soboleva ER, Shvarts IP, Botnar IM. The risk of neurological complications following aortocoronary bypass in patients with multifocal atherosclerosis. Anesteziologiya i reanimatologiya. 1991:19-22                                                                                                                                                                                   | not in english |
| Koc M, Unver S, Aydinli B, Yildirim Guclu C, Kazanci D, Balaban F, Ozgok A. The effects of three different anesthetic techniques on cerebral oxygenation and postoperative neurocognitive function in heart surgery. Gogus-Kalp-Damar Anestezi ve Yogun Bakim Dernegi Dergisi. 2014;20:77-84                                                                                                                                              | not in english |
| Kolesnykov V, Loskutov O, Druzhyna O, Maruniak S, Todurov B. Features of cerebral blood flow dynamics in patients with arterial hypertension during cardiac surgery. [russian]. Georgian Medical News. 2019:13-19                                                                                                                                                                                                                         | not in english |
| Krenkel GL. Structure and dynamics of mental disorders in patients before heart surgery and in the early postoperative period. Zhurnal nevrologii i psikiatrii imeni S.S. Korsakova / Ministerstvo zdravookhraneniia i meditsinskoi promyshlennosti Rossiiskoi Federatsii, Vserossiiskoe obshchestvo nevrologov [i] Vserossiiskoe obshchestvo psikiatrov. 2007;107:18-25                                                                  | not in english |
| Kurnaz P, Sungur Z, Camci E, Sivrikoz N, Orhun G, Senturk M, Sayin O, Tireli E, Gurvit H. The effect of two different glycemic management protocols on postoperative cognitive dysfunction in coronary artery bypass surgery. Brazilian Journal of Anesthesiology. 2016:no pagination                                                                                                                                                     | not in english |
| Kurnaz P, Sungur Z, Camci E, Sivrikoz N, Orhun G, Senturk M, Sayin O, Tireli E, Gurvit H. The effect of two different glycemic management protocols on postoperative cognitive dysfunction in coronary artery bypass surgery. Revista Brasileira de Anestesiologia. 2017;67:258-265                                                                                                                                                       | not in english |



|                                                                                                                                                                                                                                                                                                                                     |                |
|-------------------------------------------------------------------------------------------------------------------------------------------------------------------------------------------------------------------------------------------------------------------------------------------------------------------------------------|----------------|
| Li J-y, Bi Q. [the influence of carotid artery stenosis on neurological outcomes in patients undergoing off-pump coronary artery bypass grafting]. <i>Zhonghua nei ke za zhi</i> . 2012;51:687-689                                                                                                                                  | not in english |
| Li X, Ma W, Jiang J, Yuan P, Bi Q. Morbidity and related risk factors of postoperative delirium in the patients undergoing coronary artery bypass grafting. <i>Chinese Journal of Neurology</i> . 2015;48:1069-1073                                                                                                                 | not in english |
| Malinovskii NN, Beliaev AA, Khomskaia ED, Oleinikova EN. Analysis of mental functions in patients after coronary bypass surgery. <i>Khirurgiia</i> . 2000:17-22                                                                                                                                                                     | not in english |
| Mansoori M, Boroumand AB. The effect of zolpidem or promethazine premedication on agitation, sedation and cognitive disorders before and after coronary artery bypass graft surgery. <i>Journal of Isfahan Medical School</i> . 2015;33:no pagination                                                                               | not in english |
| Mansouri M, Masoumi SGR, Izadi E. The preventive effect of donepezil on post-operative cognitive disorder in patients undergoing coronary artery bypass graft (cabg) surgery. [persian]. <i>Journal of Isfahan Medical School</i> . 2017;35:228-234                                                                                 | not in english |
| Matsumiya G, Ohtake S, Sawa Y, Takahashi T, Nishimura M, Kagizaki K, Katsura T, Matsue H, Matsuda H. [is routine application of off-pump coronary artery bypass grafting warranted?]. <i>Kyobu geka. The Japanese journal of thoracic surgery</i> . 2001;54:315-320                                                                 | not in english |
| Mortasawi A, Rosendahl U, Schroder T, Albert A, Ennker IC, Ennker J. Isolated coronary artery bypass grafting in the 9th decade of life. <i>Zeitschrift fur Gerontologie und Geriatrie</i> . 2000;33:381-387                                                                                                                        | not in english |
| Mu D-l, Wang D-x, Li L-h, Shan G-j, Su Y, Yu Q-j, Shi C-x. [postoperative delirium is associated with cognitive dysfunction one week after coronary artery bypass grafting surgery]. <i>Beijing da xue xue bao. Yi xue ban = Journal of Peking University. Health sciences</i> . 2011;43:242-249                                    | not in english |
| Mullges W, Misoph M, Berg D, Hickethier T, Babin-Ebell J. Aprotinin and cognitive performance after coronary artery bypass surgery. <i>Zeitschrift fur Herz-, Thorax- und Gefasschirurgie</i> . 2001;15:29-34                                                                                                                       | not in english |
| Ohnishi Y, Uchida O, Hayashi Y, Kuro M, Sugimoto K, Kuriyama Y. [relationship between retained microbubbles and neuropsychologic alterations after cardiac operation]. <i>Masui. The Japanese journal of anesthesiology</i> . 1995;44:1327-1333                                                                                     | not in english |
| Ovchinnikov DA, Amosov DD, Vorobyov EA, Garnyuk VV, Beltiukov PP, Grebennik VK, Gordeev ML, Barantsevich ER. [cognitive dysfunction and content of inflammatory markers in patients after coronary artery bypass graft]. <i>Zhurnal Nevrologii i Psikiatrii Imeni S.S. Korsakova</i> . 2017;117:5-10                                | not in english |
| Ozturk T, Kocan AA, Yildirim F, Alp D, Kurdal T. The effect of beta-blocking agents on morbidity und mortality following coronary artery bypass surgery. <i>Gogus-Kalp-Damar Anestezisi ve Yogun Bakim Dernegi Dergisi</i> . 2013;19:80-85                                                                                          | not in english |
| Petrova MM, Prokopenko SV, Eremina OV, Matjushin GV, Sakovich VA, Drobot DB, Mozhejko EY, Kaskaeva DS. No title. <i>Rational Pharmacotherapy in Cardiology</i> . 2015;11:391-397                                                                                                                                                    | not in english |
| Petrova MM, Prokopenko SV, Eremina OV, Mozhejko EY, Kaskaeva DS, Gankin MI. Cerebral circulation and cognitive status of coronary heart disease patients after bypass surgery. [russian]. <i>Russian Journal of Cardiology</i> . 2017;149:34-41                                                                                     | not in english |
| Petrova MM, Prokopenko SV, Eremina OV, Mozhejko EY, Kaskaeva DS. Correction of postoperative cognitive dysfunction in cardiosurgery using computer-based stimulation programs. <i>Zhurnal Nevrologii i Psihiatrii imeni S.S. Korsakova</i> . 2016;116:35-41                                                                         | not in english |
| Petrova MM, Prokopenko SV, Eremina OV, Mozheyko EY, Kaskaeva DS, Gankin MI. Cerebral circulation and cognition in patients with coronary heart disease underwent coronary bypass operation. [russian]. <i>Russian Journal of Cardiology</i> . 2017;143:77-84                                                                        | not in english |
| Petrova MM, Shprakh VV, Kaskaeva DS, Eremina OV, Narkevich AN, Eremina SS. Prognostic methods of postoperative cognitive dysfunction in patients with ischemic heart disease after coronary bypass surgery under extracorporeal circulation. [russian]. <i>Zhurnal nevrologii i psikiatrii imeni S.S.</i> 2018;Korsakova. 118:81-86 | not in english |
| Pfeiffer T, Siepe M, Benk C, Gieringer A, Zemann S, Schlensak C, Beyersdorf F. Influence of a changed perfusion management with increased perfusion pressure in heart-lung machine on the postoperative neuropsychological capabilities of the patient. <i>Kardiotechnik</i> . 2011;20:3-7                                          | not in english |
| Polushin AY, Yanishevskiy SN, Maslevtsov DV, Krivov VO, Beskrovnaya OV, Molchan NS. The efficacy of prevention of postoperative cognitive dysfunction in cardiac surgeries with the use of the cerebrolysin. [russian]. <i>Zhurnal Nevrologii i Psihiatrii imeni S.S.</i> 2017;Korsakova. 117:37-45                                 | not in english |

|                                                                                                                                                                                                                                                                                                                                                               |                |
|---------------------------------------------------------------------------------------------------------------------------------------------------------------------------------------------------------------------------------------------------------------------------------------------------------------------------------------------------------------|----------------|
| Rodig G, Taeger K. Memory function in the early postoperative period after cardiac surgery - impact of the anaesthetic procedure and comparison with memory function after vascular surgery. <i>Anesthesiologie und Intensivmedizin</i> . 2002;43:431-455                                                                                                     | not in english |
| Rothenhausler HB, Stepan A, Hetterle R, Trantina-Yates A. The effects of coronary artery bypass graft surgery on health-related quality of life, cognitive performance, and emotional status outcomes: A prospective 6-month follow-up consultation-liaison psychiatry study. <i>Fortschritte der Neurologie Psychiatrie</i> . 2010;78:343-354                | not in english |
| Sezer O, Karlidag R, Karabulut AB, Ozcan C, Nisanoglu V, Turkoz Y, But A, Unal S. Relationship between nitric oxide levels and delirium in patients with coronary bypass operation. <i>Klinik Psikofarmakoloji Bulteni</i> . 2004;14:185-190                                                                                                                  | not in english |
| Solodukhin AV, Bezzubova VA, Kuhareva IN, Inozemtseva AA, Seryy AV, Yanitskiy MS, Trubnikova OA, Barbarash OL. The relationship between psychological characteristics of the attitude to the disease, coping behavior of patients with ischemic heart disease, and their cognitive status. <i>RUDN Journal of Psychology and Pedagogics</i> . 2017;14:178-189 | not in english |
| Stevens R, Gersbach P, Ruchat P, Hurni M, Stumpe F, Fischer A, Sadeghi H. [cardiac surgery in octogenarians]. <i>Chirurgie cardiaque chez l'octogenaire</i> . 1995;125:2084-2089                                                                                                                                                                              | not in english |
| Sugimoto K, Ohata A, Terada H, Kuriyama Y. Changes in neuropsychological functions following cardiovascular surgery. <i>Clinical Neurology</i> . 1995;35:606-610                                                                                                                                                                                              | not in english |
| Thiel A, Zimmer M, Stertmann WA, Kaps M, Hempelmann G. Microembolisations during cardiac surgery under extracorporeal circulation. <i>Anesthesiologie Intensivmedizin Notfallmedizin Schmerztherapie</i> . 1997;32:715-720                                                                                                                                    | not in english |
| Trubnikova O, Mamontova A, Maleva O, Kuhareva I, Barbarash O. Factors determining the development of long-term postoperative cognitive dysfunction in patients with type 2 diabetes undergoing coronary artery bypass grafting. <i>European Journal of Preventive Cardiology</i> . 2015;22:S189                                                               | not in english |
| Trubnikova OA, Maleva OV, Tarasova IV, Mamontova AS, Uchasova EG, Barbarash OL. Effect of statins on development of early cognitive dysfunction after coronary artery bypass grafting. <i>Kardiologiia</i> . 2015;55:49-56                                                                                                                                    | not in english |
| Trubnikova OA, Mamontova AS, Maleva OV, Tarasova IV, Kukhareva IN, Kuzmina AA, Kagan ES, Barbarash OL. Predictors of persistent post-operation cognitive dysfunction in 2 type diabetes patients after coronary bypass grafting. <i>Russian Journal of Cardiology</i> . 2016;130:12-18                                                                        | not in english |
| Trubnikova OA, Mamontova AS, Syrova ID, Kukhareva IN, Maleva OV, Barbarash OL. The cognitive status of patients with type 2 diabetes mellitus after coronary bypass surgery. <i>Klinicheskaiia Meditsina</i> . 2015;93:39-44                                                                                                                                  | not in english |
| Trubnikova OA, Mamontova AS, Tarasova IV, Maleva OV, Kuz'mina AA, Barbarash OL. Association of cognitive impairments with carbohydrate and lipid metabolic parameters in type 2 diabetes mellitus patients undergoing coronary bypass surgery. <i>Terapevticheskii Arkhiv</i> . 2015;87:69-75                                                                 | not in english |
| Trubnikova OA, Tarasova IV, Mamontova AS, Syrova ID, Maleva OV, Barbarash OL. A role of carotid stenoses in the structure of early postoperative cognitive dysfunction in patients underwent coronary artery bypass grafting. <i>Zhurnal Nevrologii i Psikhiiatrii Imeni S.S. Korsakova</i> . 2014;114:36-42                                                  | not in english |
| Trubnikova OA, Tarasova IV, Mamontova AS, Syrova ID, Maleva OV, Barbarash OL. Structure of cognitive disorders and dynamics of bioelectric activity of the brain in patients after direct myocardial revascularization. <i>Russian Journal of Cardiology</i> . 2014;112:57-62                                                                                 | not in english |
| Trubnikova OA, Tarasova IV, Syrova ID, Mamontova AS, Kovalenko AV, Barbarash OL, Barbarash LS. Neuropsychological status of patients with low and moderate carotid artery stenoses after the coronary artery bypass surgery. <i>Zhurnal Nevrologii i Psichiatrii imeni S.S. Korsakova</i> . 2013;113:28-33                                                    | not in english |
| Tsygan NV, Odinak MM, Khubulava GG, Tsygan VN, Peleshok AS, Andreev RV, Kurasov ES, Litvinenko IV. [postoperative cerebral dysfunction]. <i>Zhurnal Nevrologii i Psikhiiatrii Imeni S.S. Korsakova</i> . 2017;117:34-39                                                                                                                                       | not in english |
| Valentini M, Spezzaferrri R, Brambilla G, Tavanelli M, Sangiuliano M, Majorino G, Racca V, Ferratini M. Complexities of psychological disorders observable after surgical myocardial revascularization in male subjects. <i>Italian Heart Journal Supplement</i> . 2005;6:375-381                                                                             | not in english |
| Wos S, Opala G, Jasinski M, Janas P, Bachowski R, Kus H, Domaradzki W, Gemel M, Deja M, Dyaczynska-Herman A. The incidence of early central nervous system complications following cardiac surgery with cardiopulmonary bypass. <i>Kardiologia Polska</i> . 1997;47:115-119                                                                                   | not in english |

|                                                                                                                                                                                                                                                                                                                                         |                    |
|-----------------------------------------------------------------------------------------------------------------------------------------------------------------------------------------------------------------------------------------------------------------------------------------------------------------------------------------|--------------------|
| Xu BL, Bi Q, Chen MY, Luo D. Ct cerebral perfusion parameters in prediction of postoperative cognition disorders of off-pump coronary artery bypass grafting. <i>Chinese Journal of Interventional Imaging and Therapy</i> . 2015;12:298-302                                                                                            | not in english     |
| Xu D, Liu F, Hua Y, Zhang K-f, Liu Y-h, Shang X-b, Li H-l, Yao Q, Li X-f, Zhang R, et al. Increasing cardiopulmonary bypass flow volume improves outcome of patient with carotid stenosis undergoing coronary artery bypass grafting. <i>Zhonghua wai ke za zhi [Chinese journal of surgery]</i> . 2009;47:577-579                      | not in english     |
| Yilmaz E, Aksun M, Girgin S, Gulseren S, Kuru V, Sencan A, Koroglu L, Aran G, Karahan N. The comparison of the effects of the off-pump and cardiopulmonary by-pass techniques upon postoperative delirium at elective coronary by-pass greft surgery. <i>Gogus-Kalp-Damar Anestezi ve Yogun Bakim Dernegi Dergisi</i> . 2013;19:67-75   | not in english     |
| Yilmaz M, Aydin U, Kilic Yilmaz V, Yavuz Y, Denizalti TB, Canik S. The effect of magnesium on neurocognitive functions after cardiopulmonary by-pass surgery. <i>Turkiye Klinikleri Cardiovascular Sciences</i> . 2014;26:105-110                                                                                                       | not in english     |
| Yin Y-q, Luo A-l, Guo X-y, Li L-h, Ren H-z, Ye T-h, Huang Y-g. Perioperative cortisol circadian secretion and neuropsychological states in patients undergoing coronary artery bypass grafting surgery. <i>Zhonghua wai ke za zhi [Chinese journal of surgery]</i> . 2005;43:463-467                                                    | not in english     |
| Zhang Y, Cheng H, Xu C, Bao H, Shi H, Ge Y, Wei H. [effects of ultrasound-guided stellate ganglion block on cerebral oxygen metabolism and postoperative cognitive dysfunction in the elderly]. <i>Sheng wu yi xue gong cheng xue za zhi = Journal of biomedical engineering = Shengwu yixue gongchengxue zazhi</i> . 2014;31:1107-1110 | not in english     |
| Zhang Y, Qian Y, Bao H, Shi H, Zhou J. Effect of stellate ganglion block on bilateral regional cerebral oxygen saturation and postoperative cognitive function. <i>Sheng wu yi xue gong cheng xue za zhi = Journal of biomedical engineering = Shengwu yixue gongchengxue zazhi</i> . 2016;33:132-135                                   | not in english     |
| Zhao YH, Wen DX. Analysis of related factors of postoperative cognitive dysfunction for patients undergoing off-pump coronary artery bypass graft surgery. <i>Journal of Shanghai Jiaotong University (Medical Science)</i> . 2016;36:100-104                                                                                           | not in english     |
| Zoll A, Degirmenci U, Bleich S, Richter-Schmidinger T, Kornhuber J, Fischlein T, Weih M. Neuropsychological complications after coronary bypass grafting. <i>Fortschritte der Neurologie-Psychiatrie</i> . 2009;77:97-101                                                                                                               | not in english     |
| Ernest CS, Elliott PC, Murphy BM, Le Grande MR, Goble AJ, Higgins RO, Worcester MUC, Tatoulis J. Predictors of cognitive function in candidates for coronary artery bypass graft surgery. <i>Journal of the International Neuropsychological Society : JINS</i> . 2007;13:257-266                                                       | only baseline data |
| Ernest CS, Murphy BM, Worcester MUC, Higgins RO, Elliott PC, Goble AJ, Le Grande MR, Genardini N, Tatoulis J. Cognitive function in candidates for coronary artery bypass graft surgery. <i>The Annals of thoracic surgery</i> . 2006;82:812-818                                                                                        | only baseline data |
| Hudetz JA, Patterson KM, Pagel PS. Comparison of pre-existing cognitive impairment, amnesic mild cognitive impairment, and multiple domain mild cognitive impairment in men scheduled for coronary artery surgery. <i>European Journal of Anaesthesiology</i> . 2012;29:320-325                                                         | only baseline data |
| Tsushima WT, Johnson DB, Lee JD, Matsukawa JM, Fast KMS. Depression, anxiety and neuropsychological test scores of candidates for coronary artery bypass graft surgery. <i>Archives of clinical neuropsychology : the official journal of the National Academy of Neuropsychologists</i> . 2005;20:667-673                              | only baseline data |
| Aldea GS, O'Gara P, Shapira OM, Treanor P, Osman A, Patalis E, Arkin C, Diamond R, Babikian V, Lazar HL, et al. Effect of anticoagulation protocol on outcome in patients undergoing cabg with heparin-bonded cardiopulmonary bypass circuits. <i>The Annals of thoracic surgery</i> . 1998;65:425-433                                  | other              |
| Barry SJE, Zeger SL, Selnes OA, Grega MA, Borowicz LM, Jr., McKhann GM. Quantitative methods for tracking cognitive change 3 years after coronary artery bypass surgery. <i>The Annals of thoracic surgery</i> . 2005;79:1104-1109                                                                                                      | other              |
| Bhamidipati D, Goldhammer JE, Sperling MR, Torjman MC, McCarey MM, Whellan DJ. Cognitive outcomes after coronary artery bypass grafting. <i>Journal of Cardiothoracic &amp; Vascular Anesthesia</i> . 2017;31:707-718                                                                                                                   | other              |
| Cockburn J, Hildick-Smith D, Trivedi U, De Belder A. Coronary revascularisation in the elderly. <i>Heart</i> . 2017;103:316-324                                                                                                                                                                                                         | other              |
| Indja B, Fanning JP, Maller JJ, Fraser JF, Bannon PG, Vallely M, Grieve SM. Neural network imaging to characterize brain injury in cardiac procedures: The emerging utility of connectomics. <i>British Journal of Anaesthesia</i> . 2017;118:680-688                                                                                   | other              |

|                                                                                                                                                                                                                                                                                                                                     |                |
|-------------------------------------------------------------------------------------------------------------------------------------------------------------------------------------------------------------------------------------------------------------------------------------------------------------------------------------|----------------|
| Lamy A, Devereaux PJ, Prabhakaran D, Hu S, Piegas LS, Straka Z, Paolasso E, Taggart D, Lanas F, Akar AR, et al. Rationale and design of the coronary artery bypass grafting surgery off or on pump revascularization study: A large international randomized trial in cardiac surgery. <i>American Heart Journal</i> . 2012;163:1-6 | other          |
| Wu M, Liang Y, Dai Z, Wang S. Perioperative dexmedetomidine reduces delirium after cardiac surgery: A meta-analysis of randomized controlled trials. <i>Journal of Clinical Anesthesia</i> . 2018;50:33-42                                                                                                                          | other          |
| Yuan SM, Lin H. Postoperative cognitive dysfunction after coronary artery bypass grafting. <i>Brazilian Journal of Cardiovascular Surgery</i> . 2019;34:76-84                                                                                                                                                                       | other          |
| Maggio M, Nicolini F, Cattabiani C, Beghi C, Gherli T, Schwartz RS, Valenti G, Ceda GP. Effects of testosterone supplementation on clinical and rehabilitative outcomes in older men undergoing on-pump cabg. <i>Contemporary Clinical Trials</i> . 2012;33:730-738                                                                 | protocol paper |
| Uva MS, Matias F, Cavaco S, Magalhaes MP. Rationale, design and methodology for a prospective randomized study of graft patency in off-pump and on-pump multi-vessel coronary artery bypass surgery (promiss) using multidetector computed tomography. <i>Trials</i> . 2008;9:44                                                    | protocol paper |
| Whitlock R, Teoh K, Vincent J, Devereaux PJ, Lamy A, Paparella D, Zuo Y, Sessler DI, Shah P, Villar JC, et al. Rationale and design of the steroids in cardiac surgery trial. <i>American Heart Journal</i> . 2014;167:660-665                                                                                                      | protocol paper |

**Table S6. Demographic data, presence in statistical analyses and quality assessment scores for included studies within risk and protective factor meta-analyses for delirium and cognitive-decline post CABG.**

| Ref. No.      | Lead Author, Year  | Total No. of Patients | Total No. of Males | Mean/Median Age | SD/Range/IQR of Age | Cognitive Decline |    |    |     | QA (/12) |
|---------------|--------------------|-----------------------|--------------------|-----------------|---------------------|-------------------|----|----|-----|----------|
|               |                    |                       |                    |                 |                     | C1                | C2 | C3 | Del |          |
| <sup>51</sup> | Al Tmimi, 2016     | 92                    | 78                 | 67              | R: 46-86            | -                 | -  | -  | x   | 12       |
| <sup>52</sup> | Baba, 2007         | 218                   | 152                | 71.25           | 5.5                 | x                 | -  | -  | -   | 10       |
| <sup>53</sup> | Boodhwani, 2006*   | 448                   | 390                | 68.3            | 0.4                 | x                 | -  | -  | -   | 12       |
| <sup>54</sup> | Braekken, 1998     | 14                    | 14                 | N/A             | N/A                 | -                 | x  | -  | -   | 7        |
| <sup>55</sup> | Bucerius, 2005     | 9682                  | 7500               | N/A             | N/A                 | -                 | -  | -  | x   | 6        |
| <sup>56</sup> | Caldas 2019        | 67                    | 51                 | 64.3            | 9.5                 | -                 | -  | -  | x   | 12       |
| <sup>57</sup> | Chen, 2017         | 136                   | 104                | 60.85           | 7.76                | -                 | -  | -  | x   | 10       |
| <sup>58</sup> | Christiansen, 2016 | 8                     | 7                  | 63.38           | 10.69               | x                 | -  | -  | -   | 7        |
| <sup>59</sup> | Coffey, 1983       | 1669                  | 1384               | 52.15           | SEM: 8              | -                 | -  | -  | x   | 7        |
| <sup>60</sup> | Colak, 2015        | 190                   | 148                | 62.66           | 7.96                | x                 | -  | -  | -   | 7        |
| <sup>61</sup> | Cumurcu, 2008      | 50                    | 37                 | 59.62           | 10.66               | -                 | -  | -  | x   | 9        |

| Ref. No.      | Lead Author, Year         | Total No. of Patients | Total No. of Males | Mean/Median Age | SD/Range/IQR of Age | Cognitive Decline |    |    |     | QA (/12) |
|---------------|---------------------------|-----------------------|--------------------|-----------------|---------------------|-------------------|----|----|-----|----------|
|               |                           |                       |                    |                 |                     | C1                | C2 | C3 | Del |          |
| <sup>62</sup> | deTournay-Jette, 2011     | 61                    | 51                 | 70.39           | 4.69                | x                 | x  | -  | -   | 10       |
| <sup>63</sup> | Dieleman, 2009            | 281                   | 192                | 61.3            | 9                   | -                 | x  | x  | -   | 10       |
| <sup>64</sup> | Djaiani, 2003             | 417                   | 293                | 60.34           | 10                  | -                 | x  | -  | -   | 9        |
| <sup>65</sup> | Dong, 2014                | 108                   | 83                 | 63              | 7.9                 | x                 | -  | -  | x   | 10       |
| <sup>66</sup> | Eriksson, 2002            | 52                    | 40                 | 70.27           | 5.53                | -                 | -  | -  | x   | 12       |
| <sup>67</sup> | Goto, 2000                | 177                   | 117                | 70.26           | 4.99                | x                 | -  | -  | -   | 11       |
| <sup>68</sup> | Gottesman, 2010           | 5052                  | 3682               | 63.92           | N/A                 | -                 | -  | -  | x   | 7        |
| <sup>69</sup> | Hall, 1999                | 35                    | 27                 | 65.9            | 9.1                 | x                 | -  | -  | -   | 12       |
| <sup>70</sup> | Harmon, 2004 <sup>†</sup> | 35                    | 28                 | 61.7            | 7.51                | x                 | x  | -  | -   | 9        |
| <sup>71</sup> | Harmon, 2005 <sup>†</sup> | 36                    | 30                 | 64.07           | N/A                 | x                 | -  | -  | -   | 12       |
| <sup>72</sup> | Humphreys, 2016           | 173                   | 148                | 63.47           | 10.1                | -                 | -  | -  | x   | 7        |
| <sup>73</sup> | Kadoi, 2001 <sup>‡</sup>  | 185                   | 138                | N/A             | N/A                 | x                 | x  | -  | -   | 6        |
| <sup>74</sup> | Kadoi, 2002 <sup>§</sup>  | 60                    | 53                 | 62.75           | 8.5                 | -                 | x  | -  | -   | 9        |

| Ref. No.      | Lead Author, Year                 | Total No. of Patients | Total No. of Males | Mean/Median Age | SD/Range/IQR of Age | Cognitive Decline |    |    |     | QA (/12) |
|---------------|-----------------------------------|-----------------------|--------------------|-----------------|---------------------|-------------------|----|----|-----|----------|
|               |                                   |                       |                    |                 |                     | C1                | C2 | C3 | Del |          |
| <sup>75</sup> | Kadoi, 2003 <sup>‡</sup>          | 180                   | 136                | 65              | 9                   | -                 | x  | -  | -   | 9        |
| <sup>76</sup> | Kadoi, 2005 <sup>§</sup>          | 280                   | 210                | 65.07           | 9.93                | x                 | x  | -  | -   | 9        |
| <sup>77</sup> | Kadoi, 2007 <sup>§</sup>          | 106                   | 53                 | 62.55           | 10.45               | -                 | x  | -  | -   | 9        |
| <sup>78</sup> | Kadoi, 2011 (a) <sup>§</sup>      | 124                   | 89                 | 61.29           | 5.39                | x                 | -  | -  | -   | 12       |
| <sup>79</sup> | Kadoi, 2011 (b) <sup>§</sup>      | 90                    | 68                 | 65              | 9                   | x                 | x  | -  | -   | 9        |
| <sup>80</sup> | Kazmierski, 2014 (a) <sup>¶</sup> | 113                   | 90                 | 64              | R: 59-71            | -                 | -  | -  | x   | 12       |
| <sup>81</sup> | Kazmierski, 2014 (b) <sup>¶</sup> | 102                   | N/A                | N/A             | N/A                 | -                 | -  | -  | x   | 12       |
| <sup>82</sup> | Kazmierski, 2014 (c) <sup>¶</sup> | 113                   | 90                 | Med: 64         | R: 59-71            | -                 | -  | -  | x   | 12       |
| <sup>83</sup> | Khan, 2014                        | 735                   | 577                | 55.64           | 9.65                | -                 | -  | -  | x   | 10       |
| <sup>84</sup> | Khatri, 1999                      | 170                   | 127                | 61              | 10                  | -                 | x  | -  | -   | 7        |
| <sup>85</sup> | Kok, 2017                         | 57                    | N/A                | N/A             | N/A                 | -                 | -  | x  | -   | 5        |
| <sup>86</sup> | Kumpaitiene, 2019                 | 59                    | 34                 | 66.49           | 8.04                | x                 | -  | -  | -   | 11       |
| <sup>87</sup> | Lachmann, 2018                    | 252                   | 180                | 61.0            | 9.1                 | -                 | -  | x  | -   | 8        |

| Ref. No.       | Lead Author, Year          | Total No. of Patients | Total No. of Males | Mean/Median Age | SD/Range/IQR of Age | Cognitive Decline |    |    |     | QA (/12) |
|----------------|----------------------------|-----------------------|--------------------|-----------------|---------------------|-------------------|----|----|-----|----------|
|                |                            |                       |                    |                 |                     | C1                | C2 | C3 | Del |          |
| <sup>88</sup>  | Leenders, 2018             | 357                   | 304                | 66.20           | 8.84                | -                 | -  | -  | x   | 9        |
| <sup>89</sup>  | Li, 2015                   | 38                    | 34                 | 62.4            | 11.8                | -                 | -  | -  | x   | 10       |
| <sup>90</sup>  | Liu, 2009                  | 227                   | 209                | 60              | 8                   | x                 | x  | -  | -   | 9        |
| <sup>91</sup>  | Loponen, 2008              | 300                   | 237                | 66.17           | 8.89                | -                 | -  | -  | x   | 8        |
| <sup>92</sup>  | Mardani, 2012              | 196                   | 183                | 61.84           | 11.83               | -                 | -  | -  | x   | 9        |
| <sup>93</sup>  | Mariscalco, 2012           | 4079                  | 3220               | 67.8            | 9.2                 | -                 | -  | -  | x   | 12       |
| <sup>94</sup>  | Martin, 2010 <sup>#</sup>  | 14262                 | 10912              | N/A             | N/A                 | -                 | -  | -  | x   | 5        |
| <sup>95</sup>  | Martin, 2012 <sup>#</sup>  | 8474                  | 6391               | N/A             | N/A                 | -                 | -  | -  | x   | 7        |
| <sup>96</sup>  | Mathew, 2006 <sup>**</sup> | 121                   | N/A                | N/A             | N/A                 | -                 | x  | -  | -   | 8        |
| <sup>97</sup>  | Mathew, 2007 <sup>**</sup> | 677                   | 471                | 61.7            | 10.5                | -                 | x  | -  | -   | 9        |
| <sup>98</sup>  | Miyazaki, 2011             | 768                   | N/A                | N/A             | N/A                 | -                 | -  | -  | x   | 6        |
| <sup>99</sup>  | Mu, 2010                   | 243                   | 200                | 61              | 8.3                 | -                 | -  | -  | x   | 12       |
| <sup>100</sup> | Mu, 2013                   | 166                   | 141                | 60              | 8.9                 | x                 | -  | -  | -   | 12       |



| Ref. No.       | Lead Author, Year | Total No. of Patients | Total No. of Males | Mean/Median Age | SD/Range/IQR of Age | Cognitive Decline |    |    |     | QA (/12) |
|----------------|-------------------|-----------------------|--------------------|-----------------|---------------------|-------------------|----|----|-----|----------|
|                |                   |                       |                    |                 |                     | C1                | C2 | C3 | Del |          |
| <sup>101</sup> | Newman, 1987      | 67                    | 62                 | 55.0            | 7.8                 | x                 | -  | -  | -   | 10       |
| <sup>102</sup> | Nikolic, 2012     | 370                   | 271                | N/A             | N/A                 | -                 | -  | -  | x   | 7        |
| <sup>103</sup> | Norkiene, 2007    | 1367                  | 1035               | 64.98           | 9.14                | -                 | -  | -  | x   | 10       |
| <sup>104</sup> | Norkiene, 2011    | 127                   | 103                | 60.91           | 7.24                | x                 | -  | -  | -   | 11       |
| <sup>105</sup> | Oh, 2008          | 46                    | 36                 | 63              | 5.5                 | x                 | -  | -  | -   | 11       |
| <sup>106</sup> | Oh, 2017          | 292                   | 211                | N/A             | N/A                 | -                 | -  | -  | x   | 10       |
| <sup>107</sup> | Oldham, 2015      | 102                   | 76                 | 65.1            | 9                   | -                 | -  | -  | x   | 11       |
| <sup>108</sup> | Oldham, 2019      | 131                   | 96                 | 65.8            | 9.2                 | -                 | -  | -  | x   | 12       |
| <sup>109</sup> | Omiya, 2015       | 88                    | N/A                | 69              | 7                   | -                 | -  | -  | x   | 10       |
| <sup>110</sup> | Otomo, 2013       | 153                   | 109                | 72              | 7                   | -                 | -  | -  | x   | 12       |
| <sup>111</sup> | Palmbergen, 2012  | 642                   | 452                | 68.5            | 9.79                | -                 | -  | -  | x   | 11       |
| <sup>112</sup> | Plaschke, 2010    | 114                   | 89                 | 68.98           | 8.39                | -                 | -  | -  | x   | 12       |
| <sup>113</sup> | Reents, 2002      | 47                    | 41                 | 60.4            | 8                   | x                 | -  | -  | -   | 10       |

| Ref. No.       | Lead Author, Year               | Total No. of Patients | Total No. of Males | Mean/Median Age | SD/Range/IQR of Age | Cognitive Decline |    |    |     | QA (/12) |
|----------------|---------------------------------|-----------------------|--------------------|-----------------|---------------------|-------------------|----|----|-----|----------|
|                |                                 |                       |                    |                 |                     | C1                | C2 | C3 | Del |          |
| <sup>114</sup> | Restrepo, 2002                  | 13                    | 10                 | 65              | 9                   | x                 | -  | -  | -   | 10       |
| <sup>115</sup> | Ringaitiene, 2015               | 99                    | 70                 | 67.6            | 7.78                | -                 | -  | -  | x   | 10       |
| <sup>116</sup> | Robson, 2000                    | 124                   | N/A                | 59.44           | 9.25                | -                 | x  | -  | -   | 7        |
| <sup>117</sup> | Rodriguez, 2010                 | 356                   | 325                | 63              | 9                   | x                 | x  | -  | -   | 5        |
| <sup>118</sup> | Rolfson, 1999 (a) <sup>††</sup> | 75                    | 59                 | N/A             | N/A                 | -                 | -  | -  | x   | 12       |
| <sup>119</sup> | Rolfson, 1999 (b) <sup>††</sup> | 71                    | 57                 | 71              | N/A                 | -                 | -  | -  | x   | 11       |
| <sup>120</sup> | Royse, 2000                     | 47                    | 37                 | 64.22           | 1.78                | x                 | x  | -  | -   | 8        |
| <sup>121</sup> | Royse, 2011                     | 180                   | 153                | 62.79           | 10.5                | -                 | -  | -  | x   | 10       |
| <sup>122</sup> | Rudolph, 2005                   | 36                    | 36                 | 68.8            | 9.2                 | -                 | -  | -  | x   | 12       |
| <sup>123</sup> | Rudolph, 2006 <sup>‡‡</sup>     | 80                    | 62                 | 74.9            | 6.2                 | -                 | -  | -  | x   | 11       |
| <sup>124</sup> | Rudolph, 2009 <sup>‡‡</sup>     | 68                    | 67                 | 70.7            | 8.2                 | -                 | -  | -  | x   | 12       |
| <sup>125</sup> | Sahan, 2018                     | 40                    | 34                 | 65.85           | 6.02                | x                 | x  | -  | -   | 9        |
| <sup>6</sup>   | Santos, 2004                    | 220                   | 142                | 70.71           | 5.48                | -                 | -  | -  | x   | 11       |

| Ref. No.       | Lead Author, Year           | Total No. of Patients | Total No. of Males | Mean/Median Age | SD/Range/IQR of Age | Cognitive Decline |    |    |     | QA (/12) |
|----------------|-----------------------------|-----------------------|--------------------|-----------------|---------------------|-------------------|----|----|-----|----------|
|                |                             |                       |                    |                 |                     | C1                | C2 | C3 | Del |          |
| <sup>126</sup> | Scott, 2002                 | 103                   | 84                 | 64.77           | 1.3                 | x                 | -  | -  | -   | 12       |
| <sup>127</sup> | Sevuk, 2015                 | 200                   | 128                | 70.65           | 3.95                | -                 | -  | -  | x   | 12       |
| <sup>128</sup> | Siepe, 2011                 | 92                    | 74                 | 66.87           | 8.98                | -                 | -  | -  | x   | 12       |
| <sup>129</sup> | Silbert, 2006 <sup>§§</sup> | 326                   | 252                | 67.9            | 7.6                 | x                 | x  | -  | -   | 9        |
| <sup>130</sup> | Silbert, 2008 <sup>§§</sup> | 264                   | 203                | 67.8            | 7.7                 | x                 | -  | x  | -   | 7        |
| <sup>131</sup> | Slater, 2009                | 240                   | 201                | 64.74           | 9.96                | x                 | x  | -  | -   | 7        |
| <sup>132</sup> | Smith, 1986                 | 55                    | 51                 | 54.7            | R: 37-74            | x                 | -  | -  | -   | 9        |
| <sup>133</sup> | Smith, 2000                 | 381                   | 308                | N/A             | N/A                 | -                 | x  | -  | -   | 8        |
| <sup>134</sup> | Stump, 1996                 | 167                   | 138                | 61              | 10                  | x                 | -  | -  | -   | 8        |
| <sup>135</sup> | Subramaniam, 2019           | 120                   | 101                | Med: 69         | IQR: 63-76          | -                 | -  | -  | x   | 12       |
| <sup>136</sup> | Suksompong, 2002            | 110                   | 110                | 61.95           | 7.58                | x                 | -  | -  | -   | 10       |
| <sup>137</sup> | Swaminathan, 2002           | 282                   | 201                | 61              | 10.44               | -                 | x  | -  | -   | 8        |
| <sup>138</sup> | Sylvivris, 1998             | 41                    | 31                 | 69.8            | 6.9                 | x                 | -  | -  | -   | 10       |

| Ref. No.       | Lead Author, Year | Total No. of Patients | Total No. of Males | Mean/Median Age | SD/Range/IQR of Age | Cognitive Decline |    |    |     | QA (/12) |
|----------------|-------------------|-----------------------|--------------------|-----------------|---------------------|-------------------|----|----|-----|----------|
|                |                   |                       |                    |                 |                     | C1                | C2 | C3 | Del |          |
| <sup>139</sup> | Tagarakis, 2007   | 137                   | 99                 | 69.55           | 7.63                | -                 | -  | -  | x   | 7        |
| <sup>140</sup> | Tamura, 2019      | 88                    | 76                 | 69.3            | 2.5                 | -                 | -  | -  | x   | 10       |
| <sup>141</sup> | Toeg, 2013*       | 652                   | 576                | 64.37           | 9                   | x                 | -  | -  | -   | 10       |
| <sup>142</sup> | Trubnikova, 2014  | 101                   | 101                | 56.6            | 5.85                | x                 | -  | x  | -   | 4        |
| <sup>143</sup> | Tully, 2010       | 158                   | 125                | 64.68           | 10.56               | -                 | -  | -  | x   | 10       |
| <sup>144</sup> | van Dijk, 2004    | 281                   | 191                | 61.2            | 9.0                 | -                 | x  | -  | -   | 7        |
| <sup>145</sup> | Yilmaz, 2016      | 137                   | 105                | 61.02           | 7.83                | -                 | -  | -  | x   | 10       |
| <sup>146</sup> | Zhang, 2015       | 249                   | 197                | 62.9            | 9.34                | -                 | -  | -  | x   | 12       |

†, ‡, §, ¶, †† Suspected overlap of samples; \*, †, #, \*\*, ††, §§ Known overlap of sample

Ref No. = supplementary reference list number; C1= acute cognitive decline (immediately post-operatively up to 1-month); C2= mid-term cognitive decline (1 to 6-months post-operatively); C3= long-term cognitive decline (12 to 15-months post-operatively). Del = delirium; Med = median; IQR= inter quartile range; QA = quality assessment; SD = standard deviation.

**Table S7. Subgroup meta-analyses of diagnostic tool, for pre, intra and post-operative variables for the development of delirium following CABG.**

| Variable                           | Delirium Diagnosis | k (n)      | Pooled Estimate   |            |         | Heterogeneity  |                  |
|------------------------------------|--------------------|------------|-------------------|------------|---------|----------------|------------------|
|                                    |                    |            | OR/MD*/<br>SMD†   | 95%CI      | p value | I <sup>2</sup> | Tau <sup>2</sup> |
| <b>Pre-Operative (Categorical)</b> |                    |            |                   |            |         |                |                  |
| Alcoholism                         | No Tool            |            | Insufficient Data |            |         |                |                  |
|                                    | Tool               | 5 (694)    | 0.77              | 0.46—1.29  | .317    | 0              | 0                |
| Arrhythmia, incl. AF               | No Tool            | 7 (31550)  | 2.05              | 1.77—2.37  | <.001   | 0              | 0                |
|                                    | Tool               | 8 (1252)   | 1.91              | 1.15—3.16  | <.001   | 45.09          | 0.21             |
| BMI >28 (including >30)            | No Tool            | 2 (15629)  | 0.86              | 0.51—1.47  | .587    | 62.68          | 0.10             |
|                                    | Tool               | 5 (668)    | 1.46              | 0.89—2.41  | .133    | 11.02          | 0.04             |
| BMI ≥30 only                       | No Tool            |            | Insufficient Data |            |         |                |                  |
|                                    | Tool               | 4 (419)    | 1.85              | 1.09—3.14  | .023    | 0.00           | 0                |
| Cognitive Impairment               | No Tool            |            | Insufficient Data |            |         |                |                  |
|                                    | Tool               | 6 (790)    | 4.11              | 2.59—6.53  | <.001   | 0              | 0                |
| Depression                         | No Tool            | 2 (378)    | 2.06              | 0.75—5.67  | .162    | 66.06          | 0.35             |
|                                    | Tool               | 2 (202)    | 4.14              | 1.37—12.51 | .012    | 0              | 0                |
| Diabetes                           | No Tool            | 12 (42736) | 1.46              | 1.33—1.60  | <.001   | 13.34          | 0                |
|                                    | Tool               | 18 (5419)  | 1.57              | 1.32—1.87  | <.001   | 0              | 0                |
| Dyslipidaemia/Hyperlipidaemia      | No Tool            | 4 (2283)   | 0.70              | .033—1.49  | .355    | 66.26          | 0.39             |
|                                    | Tool               | 9 (4166)   | 0.99              | 0.67—1.45  | .943    | 46.78          | 0.14             |
| Education>12years/high school      | No Tool            |            | Insufficient Data |            |         |                |                  |
|                                    | Tool               | 3 (347)    | 0.78              | 0.45—1.35  | .374    | 0              | 0                |
| Hypertension                       | No Tool            | 11 (33054) | 1.65              | 1.38—1.98  | <.001   | 50.98          | 0.04             |
|                                    | Tool               | 16 (5308)  | 1.18              | 0.88—1.57  | .267    | 38.51          | 0.12             |
| Sex (male)                         | No Tool            | 10 (30814) | 1.10              | 0.87—1.40  | .415    | 62.44          | 0.06             |
|                                    | Tool               | 25 (6639)  | 0.78              | 0.60—1.01  | .056    | 41.95          | 0.16             |
| Kidney injury                      | No Tool            | 6 (23602)  | 1.91              | 1.40—2.60  | <.001   | 36.40          | 0.05             |

| Variable                          | Delirium<br>Diagnosis | k (n)     | Pooled Estimate   |              |         | Heterogeneity  |                  |
|-----------------------------------|-----------------------|-----------|-------------------|--------------|---------|----------------|------------------|
|                                   |                       |           | OR/MD*/<br>SMD†   | 95%CI        | p value | I <sup>2</sup> | Tau <sup>2</sup> |
| Previous MI <30 days              | Tool                  | 8 (1662)  | 1.96              | 1.18—3.25    | .009    | 29.13          | 0.14             |
|                                   | No Tool               | 3 (101)   | 1.98              | 0.88—4.49    | .100    | 52.09          | 0.27             |
| Previous MI history/ever          | Tool                  | 2 (200)   | 1.04              | 0.56—1.93    | .909    | 0              | 0                |
|                                   | No Tool               | 3 (6877)  | 1.04              | 0.72—1.51    | .822    | 45.06          | 0.05             |
| Previous stroke, TIA, CVA         | Tool                  | 8 (3785)  | 1.24              | 0.92—1.67    | .160    | 0              | 0                |
|                                   | No Tool               | 6 (22297) | 2.73              | 1.92—3.88    | <.001   | 56.18          | 0.09             |
| PVD                               | Tool                  | 9 (4830)  | 2.37              | 1.50—3.70    | <.001   | 35.96          | 0.16             |
|                                   | No Tool               | 4 (11604) | 2.11              | 1.73—2.58    | <.001   | 0.90           | 0                |
| Smoking current                   | Tool                  | 10 (4736) | 2.01              | 1.28—3.15    | .003    | 49.82          | 0.24             |
|                                   | No Tool               | 5 (16780) | 1.19              | 1.07—3.53    | .030    | 85.56          | 0.33             |
| Smoking current/history           | Tool                  | 9 (1045)  | 0.83              | 0.60—1.15    | .265    | 17.36          | 0.04             |
|                                   | No Tool               | 8 (24122) | 1.41              | 1.04—1.92    | .029    | 76.07          | 0.12             |
|                                   | Tool                  | 13 (1691) | 0.92              | 0.73—1.15    | .458    | 0              | 0                |
| <b>Pre-Operative (Continuous)</b> |                       |           |                   |              |         |                |                  |
| Age (years)                       | No Tool               | 8 (3118)  | 3.11*             | 1.50—4.72    | <.001   | 51.30          | 2.31             |
|                                   | Tool                  | 20 (6185) | 4.52*             | 2.95—6.09    | <.001   | 82.93          | 9.67             |
| BMI                               | No Tool               |           | Insufficient Data |              |         |                |                  |
|                                   | Tool                  | 4 (776)   | 0.023*            | -0.6—0.65    | .653    | 15.02          | 0.07             |
| Cognition: All tests              | No Tool               |           | Insufficient Data |              |         |                |                  |
|                                   | Tool                  | 9 (887)   | -0.58†            | -0.78— -0.37 | <.001   | 34.11          | 0.03             |
| Cognition: MMSE only              | No Tool               |           | Insufficient Data |              |         |                |                  |
|                                   | Tool                  | 7 (621)   | 1.14*             | -1.91— -0.36 | .004    | 77.72          | 0.68             |
| Depression GDS                    | No Tool               |           | Insufficient Data |              |         |                |                  |
|                                   | Tool                  | 2 (233)   | 0.75*             | -0.15—1.65   | .101    | 0              | 0                |
| Education (years)                 | No Tool               |           | Insufficient Data |              |         |                |                  |
|                                   | Tool                  | 6 (665)   | -0.93*            | -1.65— -0.20 | .012    | 19.31          | 0.16             |
| EuroSCORE                         | No Tool               | 3 (1058)  | 3.06*             | 0.28— 5.83   | 0.31    | 95.87          | 5.71             |

| Variable                            | Delirium Diagnosis | k (n)     | Pooled Estimate   |              |         | Heterogeneity  |                  |
|-------------------------------------|--------------------|-----------|-------------------|--------------|---------|----------------|------------------|
|                                     |                    |           | OR/MD*/<br>SMD†   | 95%CI        | p value | I <sup>2</sup> | Tau <sup>2</sup> |
| LVEF (%)                            | Tool               | 7 (10141) | 0.65*             | 0.14—1.16    | .012    | 89.23          | 0.37             |
|                                     | No Tool            | 4 (2518)  | 1.91*             | -1.94—5.77   | .330    | 91.24          | 13.83            |
| <b>Intra-Operative (Continuous)</b> | Tool               | 7 (790)   | 0.82*             | -1.24—2.89   | .435    | 57.05          | 4.24             |
|                                     | No Tool            | 7 (3026)  | 9.88*             | -0.52— 20.29 | .063    | 94.19          | 176.11           |
| ACC time (mins)                     | Tool               | 9 (4462)  | 3.61*             | -0.97—8.18   | .123    | 75.77          | 34.07            |
|                                     | No Tool            | 8 (7693)  | 4.98*             | 2.33—7.63    | <.001   | 0              | 0                |
| CPB time (mins)                     | Tool               | 13 (4719) | 7.91*             | 2.37—13.45   | .005    | 60.91          | 52.60            |
|                                     | No Tool            |           | Insufficient Data |              |         |                |                  |
| Duration of surgery (mins)          | Tool               | 12 (1851) | 19.66*            | 7.18—32.14   | .002    | 77.61          | 342.16           |
|                                     | No Tool            | 3 (2194)  | 7.391*            | 1.78—13.00   | .010    | 94.02          | 22.48            |
| Intubation time (hours)             | Tool               | 8 (4499)  | 6.62*             | 1.25—12.00   | .016    | 98.50          | 57.31            |
|                                     | No Tool            | 3 (1863)  | 0.06*             | -0.27—0.38   | .738    | 58.79          | 0.05             |
| Number of grafts                    | Tool               | 5 (868)   | 0.15*             | 0.04—0.27    | .009    | 0              | 0                |
|                                     | No Tool            |           |                   |              |         |                |                  |
| <b>Post-Operative (Categorical)</b> |                    |           |                   |              |         |                |                  |
| Arrhythmia, incl. AF                | No Tool            | 7 (4423)  | 4.26              | 2.16—8.40    | <.001   | 82.46          | 0.65             |
|                                     | Tool               | 9 (4386)  | 2.98              | 1.93—4.61    | <.001   | 52.46          | 0.20             |
| <b>Post-Operative (Continuous)</b>  |                    |           |                   |              |         |                |                  |
| LOS in ICU (days)                   | No Tool            | 4 (2390)  | 3.39*             | -0.16—6.94   | .061    | 99.04          | 12.59            |
|                                     | Tool               | 10 (4787) | 1.69*             | 1.06—2.31    | <.001   | 94.03          | 0.86             |

Note: “Delirium Diagnosis” indicates analyses conducted by categorization of diagnostic method, where “No Tool” represents studies that did not utilize a specific instrument and “Tool” represents studies utilizing a standardized instrument e.g. Confusion Assessment Method (CAM) or the Delirium Rating Scale (DRS) to inform the reference standard. ACC= aortic cross-clamp, AF= atrial fibrillation, BMI= body mass index, CI= cognitive index score, CPB= cardiopulmonary bypass, CVA= cerebrovascular attack, GDS= geriatric depression scale, k= number of estimates (number of studies), LOS= length of stay, LVEF= left ventricular ejection fraction, MD= mean difference, MI= myocardial infarction, MMSE= mini mental state examination, n= pooled sample size, OR= odds ratio, PVD= peripheral vascular disease, SMD= standardised mean difference and TIA= transient ischemic attack. Symbols following pooled estimates denote different effect sizes: indicating OR (no symbol), MD\* and SMD†.

**Table S8. Study specific information regarding instruments utilized and method of classification/diagnosis utilized.**

| Reference No. | Lead Author, Year | Instruments                                                                                                                                                                                                                                                                         | Definitions of Cognitive Decline and Delirium (Standardized Delirium Measurement Tool: Y/N) |
|---------------|-------------------|-------------------------------------------------------------------------------------------------------------------------------------------------------------------------------------------------------------------------------------------------------------------------------------|---------------------------------------------------------------------------------------------|
| 51            | Al Tmimi, 2016    | Delirium: CAM or CAM-ICU                                                                                                                                                                                                                                                            | Delirium: Positive CAM/CAM-ICU score (Y)                                                    |
| 52            | Baba, 2007        | Cognition: HDS, Kana pick-out test, digit symbol, digit span (forward & backward)                                                                                                                                                                                                   | Cognition: 20% method                                                                       |
| 53            | Boodhwani, 2006   | Cognition: Total learning free recall, consistent long-term retrieval, long-term retrieval, long-term storage, delayed recall, digit span (forward & backward), trails A & B, grooved pegboard, symbol digit modalities, RAVLT, Buschke selective reminding, WMS-III/mental control | Cognition: 0.5 SD method                                                                    |
| 54            | Braekken, 1998    | Cognition: WAIS vocabulary, WAIS picture completion, RCPM, CVLT-L, CVLT-S, CVLT-L, serial digit learning, WMS drawing, trails A & B, letter cancellation task, WAIS                                                                                                                 | Cognition: 1 SD method                                                                      |



| Reference No. | Lead Author, Year  | Instruments                                            | Definitions of Cognitive Decline and Delirium (Standardized Delirium Measurement Tool: Y/N) |
|---------------|--------------------|--------------------------------------------------------|---------------------------------------------------------------------------------------------|
|               |                    | digit symbol, computerized RT, COWAT, grooved pegboard |                                                                                             |
| 55            | Bucerius, 2005     | Delirium: APA guidelines                               | Delirium: According to APA guidelines (N)                                                   |
| 56            | Caldas, 2019       | Delirium: CAM-ICU                                      | Delirium: Positive CAM-ICU score (Y)                                                        |
| 57            | Chen, 2017         | Delirium: CAM-ICU                                      | Delirium: Positive CAM-ICU score (Y)                                                        |
| 58            | Christiansen, 2016 | Cognition: VVLT, CST, stroop test, LDCT                | Cognition: Decline of >20% in $\geq 2$ tests                                                |
| 59            | Coffey, 1983       | Delirium: DSM-III criteria                             | Delirium: DSM-III diagnostic criteria (N)                                                   |
| 60            | Colak, 2015        | Cognition: MMSE, color trail test, grooved pegboard    | Cognition: Miscellaneous                                                                    |
|               |                    | Delirium: DSS                                          | Delirium: Patient met criteria specific to study (N)                                        |
| 61            | Cumurcu, 2008      | Delirium: DRS (for severity), DSM-IV-TR criteria, MMSE | Delirium: DSM-IV-TR diagnostic criteria (N)                                                 |

| Reference No. | Lead Author, Year      | Instruments                                                                                                                                                                                                                          | Definitions of Cognitive Decline and Delirium (Standardized Delirium Measurement Tool: Y/N) |
|---------------|------------------------|--------------------------------------------------------------------------------------------------------------------------------------------------------------------------------------------------------------------------------------|---------------------------------------------------------------------------------------------|
| 62            | de Tournay-Jette, 2011 | Cognition: MMSE (pre-screen, excluded if <24 pre-surgery), logical memory subtest (of the Rivermead battery), RAVLT, digit symbol, trails A & B, stroop test, verbal fluency test                                                    | Cognition: 1 SD method                                                                      |
| 63            | Dieleman, 2009         | Cognition: RAVLT-L, RAVLT-R, grooved pegboard, trails A & B, Sternberg memory comparison, line orientation test, stroop test, continuous performance task, self-ordering tasks, visuospatial working memory, symbol digit modalities | Cognition: RCI method                                                                       |
| 64            | Djaiani, 2003          | Cognition: Randt short story, WAIS digit span, WMS figural memory, WAIS digit symbol, Trails B, RAVLT                                                                                                                                | Cognition: 1 SD method                                                                      |
| 65            | Dong, 2014             | Cognition: 12 neuropsychological tests used to assess cognitive functions including attention, memory and executive function                                                                                                         | Cognition: RCI method                                                                       |

| Reference No. | Lead Author, Year | Instruments                                                           | Definitions of Cognitive Decline and Delirium (Standardized Delirium Measurement Tool: Y/N)              |
|---------------|-------------------|-----------------------------------------------------------------------|----------------------------------------------------------------------------------------------------------|
|               |                   | Delirium: CAM-ICU                                                     | Delirium: Positive CAM-ICU score (Features 1 and 2 are present and either Feature 3 or 4 is present) (Y) |
|               |                   | Delirium: DSM-III-R                                                   | Delirium: DSM-III-R diagnostic criteria (N)                                                              |
| 66            | Eriksson, 2002    | Delirium: CAM and OBS scale                                           | Delirium: Positive CAM score and fulfilled DSM-IV criteria (Y)                                           |
| 67            | Goto, 2000        | Cognition: HDS                                                        | Cognition: Cutoff method                                                                                 |
| 68            | Gottesman, 2010   | Delirium: DSS                                                         | Delirium: Charts reviewed for delirium in those with neurologic injury (N)                               |
| 69            | Hall, 1999        | Cognition: Trails A & B, digit span (forward & backward), COWAT       | Cognition: Z-score method                                                                                |
| 70            | Harmon, 2004      | Cognition: RAVLT, trails A & B, grooved pegboard, COWAT, digit symbol | Cognition: RCI method                                                                                    |

| Reference No. | Lead Author, Year | Instruments                                                                  | Definitions of Cognitive Decline and Delirium (Standardized Delirium Measurement Tool: Y/N)                                                                  |
|---------------|-------------------|------------------------------------------------------------------------------|--------------------------------------------------------------------------------------------------------------------------------------------------------------|
|               |                   | Delirium: DSM-III-R, MMSE                                                    | Delirium: Diagnosis based on the DSM-III-R criteria and the MMSE (N)                                                                                         |
| 71            | Harmon, 2005      | Cognition: RAVLT, trails A & B, grooved pegboard, COWAT, digit symbol        | Cognition: RCI method                                                                                                                                        |
|               |                   | Delirium: DSM-III-R, MMSE                                                    | Delirium: Diagnosis based on the DSM-III-R criteria and the MMSE (N)                                                                                         |
|               |                   | Delirium: ICDSC                                                              | Delirium: ICDSC score $\geq 4$ (Y)                                                                                                                           |
| 72            | Humphreys, 2016   | Delirium: DSI, SPMSQ                                                         | Delirium: Positive DSI score (had any one of the critical symptoms of delirium: disorientation, disturbance of consciousness, or perceptual disturbance) (Y) |
| 73            | Kadoi, 2001       | Cognition: MMSE, RAVLT, trails A & B, digit span (forward), grooved pegboard | Cognition: 1 SD method                                                                                                                                       |

| Reference No. | Lead Author, Year    | Instruments                                                                  | Definitions of Cognitive Decline and Delirium (Standardized Delirium Measurement Tool: Y/N) |
|---------------|----------------------|------------------------------------------------------------------------------|---------------------------------------------------------------------------------------------|
| 74            | Kadoi, 2002          | Cognition: MMSE, RAVLT, trails A & B, digit span (forward), grooved pegboard | Cognition: 1 SD method                                                                      |
| 75            | Kadoi, 2003          | Cognition: MMSE, RAVLT, trails A & B, digit span (forward), grooved pegboard | Cognition: 1 SD method                                                                      |
| 76            | Kadoi, 2005          | Cognition: MMSE, RAVLT, trails A & B, digit span (forward), grooved pegboard | Cognition: 1 SD method                                                                      |
| 77            | Kadoi, 2007          | Cognition: MMSE, RAVLT, trails A & B, digit span (forward), grooved pegboard | Cognition: 1 SD method                                                                      |
| 79            | Kadoi, 2011 (a)      | Cognition: MMSE, RAVLT, trails A & B, digit span (forward), grooved pegboard | Cognition: 1 SD method                                                                      |
| 78            | Kadoi, 2011 (b)      | Cognition: MMSE, RAVLT, trails A & B, digit span (forward), grooved pegboard | Cognition: 1 SD method                                                                      |
| 80            | Kazmierski, 2014 (a) | Cognition: MoCA, trails B                                                    | Cognition: Cutoff method                                                                    |

| Reference No. | Lead Author, Year    | Instruments                                                                                                                         | Definitions of Cognitive Decline and Delirium (Standardized Delirium Measurement Tool: Y/N)          |
|---------------|----------------------|-------------------------------------------------------------------------------------------------------------------------------------|------------------------------------------------------------------------------------------------------|
|               |                      | Delirium: CAM or CAM-ICU, RASS                                                                                                      | Delirium: If RASS was above -4 (-3 through +4), assessment with the CAM-ICU was administered (Y)     |
| 81            | Kazmierski, 2014 (b) | Delirium: CAM-ICU, MDAS (for severity)                                                                                              | Delirium: Positive CAM-ICU score (Feature 1 and Feature 2 and either Feature 3 or 4 are present) (Y) |
| 82            | Kazmierski, 2014 (c) | Delirium: CAM-ICU                                                                                                                   | Delirium: If RASS was above -4 (-3 through +4), assessment with the CAM-ICU was administered (Y)     |
| 83            | Khan, 2014           | Delirium: DSM-IV                                                                                                                    | Delirium: Diagnosed using DSM-IV criteria (N)                                                        |
| 84            | Khatri, 1999         | Cognition: Randt short story, WAIS-R digit span, WAIS-R digit symbol, trails B, figural memory                                      | Cognition: 20% method                                                                                |
| 85            | Kok, 2017            | Cognition: CogState brief computerized test battery (detection task, identification task, one card learning task and one back task) | Cognition: RCI method                                                                                |

| Reference No. | Lead Author, Year | Instruments                                                                                                                                                                                                                  | Definitions of Cognitive Decline and Delirium (Standardized Delirium Measurement Tool: Y/N)                                         |
|---------------|-------------------|------------------------------------------------------------------------------------------------------------------------------------------------------------------------------------------------------------------------------|-------------------------------------------------------------------------------------------------------------------------------------|
| 86            | Kumpaitiene, 2019 | Cognition: MMSE, RAVLT, WAIS digit span, WAIS digit symbol, Shulte table                                                                                                                                                     | Cognition: Pre-post change of >2 points in combined studentized score, or >2 points in $\geq 2$ individual studentized test scores. |
| 87            | Lachmann, 2018    | Motor choice RT, grooved pegboard, Trails A & B, symbol digit modalities, stroop test, continuous performance task, RAVLT, self-ordering tasks, visual/spatial working memory, Sternberg memory comparison, line orientation | Cognition: Decrease of $\geq 20\%$ on $\geq 3$ tests                                                                                |
| 88            | Leenders, 2018    | Delirium: CAM, CAM-ICU, multidisciplinary consultation                                                                                                                                                                       | Delirium: Administration of haloperidol in addition to positive CAM or CAM-ICU score and multidisciplinary consultation (Y)         |
| 89            | Li, 2015          | Delirium: CAM                                                                                                                                                                                                                | Delirium: Positive CAM score (Features 1 and 2 are present and either Feature 3 or 4 is present) (Y)                                |
| 90            | Liu, 2009         | Cognition: WMS mental control, WMS visual retention, WMS paired-associate verbal learning, digit span (forward and backward),                                                                                                | Cognition: RCI method                                                                                                               |

| Reference No. | Lead Author, Year | Instruments                                                     | Definitions of Cognitive Decline and Delirium (Standardized Delirium Measurement Tool: Y/N)                                                             |
|---------------|-------------------|-----------------------------------------------------------------|---------------------------------------------------------------------------------------------------------------------------------------------------------|
|               |                   | WAIS-R digit symbol, trails A, grooved pegboard (dom & non-dom) |                                                                                                                                                         |
| <sup>91</sup> | Loponen, 2008     | Delirium: DSS (clinically diagnosed)                            | Delirium: Clinically diagnosed with requirement that temporary medication, i.e. diazepam or haloperidol, was needed to sedate the delirious patient (N) |
| <sup>92</sup> | Mardani, 2012     | Delirium: DSM-IV, MMSE                                          | Delirium: DSM-IV criteria interviews conducted on patients with a MMSE score $\leq 23$ (N)                                                              |
| <sup>93</sup> | Mariscalco, 2012  | Delirium: CAM-ICU                                               | Delirium: At least 2 positive assessments on CAM-ICU (Features 1 and 2 are present and either Feature 3 or 4 is present) (Y)                            |
| <sup>94</sup> | Martin, 2010      | Delirium: STS                                                   | Delirium: Defined according to STS definition (N)                                                                                                       |
| <sup>95</sup> | Martin, 2012      | Delirium: STS                                                   | Delirium: Defined according to STS definition (N)                                                                                                       |



| Reference No. | Lead Author, Year | Instruments                                                                                                                                                                   | Definitions of Cognitive Decline and Delirium (Standardized Delirium Measurement Tool: Y/N)                                                 |
|---------------|-------------------|-------------------------------------------------------------------------------------------------------------------------------------------------------------------------------|---------------------------------------------------------------------------------------------------------------------------------------------|
| 96            | Mathew, 2006      | Cognition: Randt short story, WMS modified visual reproduction test, WAIS-R digit span, WAIS-R digit symbol, trails B                                                         | Cognition: 1 SD method (domain)                                                                                                             |
| 97            | Mathew, 2007      | Cognition: Randt short story, WMS modified visual reproduction test, WAIS-R digit span, WAIS-R digit symbol, trails B                                                         | Cognition: 1 SD method (domain)                                                                                                             |
| 98            | Miyazaki, 2011    | Delirium: DSM-IV                                                                                                                                                              | Delirium: Diagnosed according to DSM-IV criteria or administering antipsychotic agents by reviewing medical records during the ICU stay (N) |
| 99            | Mu, 2010          | Delirium: CAM-ICU, RASS                                                                                                                                                       | Delirium: If RASS was above -4 (-3 through +4), assessment with the CAM-ICU was administered (4-step algorithm) (Y)                         |
| 100           | Mu, 2013          | Cognition: Trails A, grooved pegboard (dom & non-dom), the WMS-Chinese edn. of the mental control subtest, digit span subtest (forward & backward), visual retention subtest, | Cognition: 1 SD method (preop) / RCI method                                                                                                 |

| Reference No. | Lead Author, Year | Instruments                                                                                                                                                                                                                                                   | Definitions of Cognitive Decline and Delirium (Standardized Delirium Measurement Tool: Y/N)          |
|---------------|-------------------|---------------------------------------------------------------------------------------------------------------------------------------------------------------------------------------------------------------------------------------------------------------|------------------------------------------------------------------------------------------------------|
|               |                   | paired associate verbal learning subtest, digit symbol subtest                                                                                                                                                                                                |                                                                                                      |
| 101           | Newman, 1987      | Cognition: RAVLT, non-verbal recognition memory test (computer-administered), Trails A & B, WAIS block design, Purdue Pegboard (left, right, and both hands), letter cancellation test, symbol digit replacement (computer-based), choice RT (computer-based) | Cognition: Decrease of $\geq 1SD$ in $>3$ tests                                                      |
| 102           | Nikolic, 2012     | Delirium: CAM                                                                                                                                                                                                                                                 | Delirium: Positive CAM score (Features 1 and 2 are present and either Feature 3 or 4 is present) (Y) |
| 103           | Norkiene, 2007    | Delirium: DSM-IV                                                                                                                                                                                                                                              | Delirium: Clinician diagnosis according to DSM-IV criteria (N)                                       |
| 104           | Norkiene, 2011    | Cognition: MMSE, RAVLT, trails A & B, digit span, digit symbol, cube drawing                                                                                                                                                                                  | Cognition: 1 SD method                                                                               |
|               |                   | Delirium: DSM-IV                                                                                                                                                                                                                                              | Delirium: Defined according to DSM-IV criteria (N)                                                   |

| Reference No. | Lead Author, Year | Instruments                                                                                                                                           | Definitions of Cognitive Decline and Delirium (Standardized Delirium Measurement Tool: Y/N) |
|---------------|-------------------|-------------------------------------------------------------------------------------------------------------------------------------------------------|---------------------------------------------------------------------------------------------|
| 105           | Oh, 2008          | Cognition: MMSE, trails A, grooved pegboard                                                                                                           | Cognition: 20% method                                                                       |
| 106           | Oh, 2017          | Delirium: DSS (psychiatric consultation & DSM-IV)                                                                                                     | Delirium: Diagnosed by psychiatric consultation according to DSM-IV criteria (N)            |
| 107           | Oldham, 2015      | Cognition: CDR, MMSE, digit span, HVLT, WMS-IV, progressive digit sequencing, three word fluency tasks, NAB mazes subtest, trails A & B, digit symbol | Cognition: Cutoff method, 1 SD method                                                       |
|               |                   | Delirium: aDST, CAM, DI, MMSE                                                                                                                         | Delirium: Determined based on CAM (Y)                                                       |
| 108           | Oldham, 2019      | Delirium: CAM, MMSE, abbreviated digit span test, DI                                                                                                  | Delirium: Psychiatrist diagnosis based on CAM, MMSE, digit span test and delirium index (Y) |
| 109           | Omiya, 2015       | Delirium: DRS-R-98                                                                                                                                    | Delirium: DRS-R-98 score $\geq$ 8 (Y)                                                       |
| 110           | Otomo, 2013       | Delirium: DSM-IV, DRS                                                                                                                                 | Delirium: Diagnosed according to DSM-IV criteria & DRS score (Y)                            |

| Reference No. | Lead Author, Year | Instruments                                                                                                                                     | Definitions of Cognitive Decline and Delirium (Standardized Delirium Measurement Tool: Y/N) |
|---------------|-------------------|-------------------------------------------------------------------------------------------------------------------------------------------------|---------------------------------------------------------------------------------------------|
| 111           | Palmbergen, 2012  | Delirium: DOS scale, confirmed by geriatrician or internist                                                                                     | Delirium: DOS scale for screening. If suspected, confirmed by geriatrician or internist (Y) |
| 112           | Plaschke, 2010    | Delirium: CAM-ICU (German), RASS                                                                                                                | Delirium: Positive CAM-ICU score (Y)                                                        |
| 113           | Reents, 2002      | Cognition: d2-letter cancellation test, trails B, Benton's visual retention test, WAIS block design, WAIS digit span                            | Cognition: 1 SD method                                                                      |
|               |                   | Delirium: DSM-IV                                                                                                                                | Delirium: Defined according to DSM-IV criteria (N)                                          |
| 114           | Restrepo, 2002    | Cognition: Trails B, oral and written naming test, oral reading tests, line cancellation, Bells tests                                           | Cognition: Z-score method                                                                   |
| 115           | Ringaitiene, 2015 | Delirium: CAM-ICU                                                                                                                               | Delirium: Positive CAM-ICU score (Y)                                                        |
| 116           | Robson, 2000      | Cognition: RAVLT, trails A & B, PASAT, grooved pegboard, COWAT, NART, block design, object assembly test, digit symbol, picture completion test | Cognition: 1 SD method (<20% tests), 0.5 SD method (<20% tests)                             |

| Reference No. | Lead Author, Year | Instruments                                                                                                                                                                                                                                                                                                                                       | Definitions of Cognitive Decline and Delirium (Standardized Delirium Measurement Tool: Y/N)                                                                                       |
|---------------|-------------------|---------------------------------------------------------------------------------------------------------------------------------------------------------------------------------------------------------------------------------------------------------------------------------------------------------------------------------------------------|-----------------------------------------------------------------------------------------------------------------------------------------------------------------------------------|
| 117           | Rodriguez, 2010   | Cognition: Group 1: RAVLT, trails A & B, grooved pegboard, symbol digit modalities, WAIS-R digit span, WMS mental control, letter (FAS test), category fluency (animal naming), finger tapping; Group 2: RAVLT, trails A & B, grooved pegboard, symbol digit modalities, WAIS-R digit span, verbal fluency (FAS test), categories (animal naming) | Cognition: Z-score method                                                                                                                                                         |
| 118           | Rolfson, 1999 (a) | Delirium: CAM, MMSE, DSM-III-R                                                                                                                                                                                                                                                                                                                    | Delirium: Diagnosed according to DSM-III-R criteria, based on results from standardized measures (e.g. CAM) and consultation with nurses, family members and hospital records (Y) |
| 119           | Rolfson, 1999 (b) | Delirium: DSM-III-R on clinical grounds (CAM, CAM-MD, CAM-RN, MMSE, clock drawing test, MD chart review, RN chart review - used to determine clinical diagnosis)                                                                                                                                                                                  | Delirium: Clinically diagnosed according to DSM-III-R criteria, based on results from standardized measures (Y)                                                                   |

| Reference No. | Lead Author, Year | Instruments                                                                                                                                                         | Definitions of Cognitive Decline and Delirium (Standardized Delirium Measurement Tool: Y/N)          |
|---------------|-------------------|---------------------------------------------------------------------------------------------------------------------------------------------------------------------|------------------------------------------------------------------------------------------------------|
| 120           | Royse, 2000       | Cognition: Recall (short-term & delayed), COWAT, trails A & B, grooved pegboard (dom & non-dom), digit symbol, digit span (forward & backward)                      | Cognition: 20% method                                                                                |
| 121           | Royse, 2011       | Cognition: Trails A & B, COWAT, stroop test, letter cancellation, grooved pegboard (dom & non-dom), RAVLT, digit span (forward & backward), symbol digit modalities | Cognition: 1 SD method (<20% tests)                                                                  |
|               |                   | Delirium: CAM                                                                                                                                                       | Delirium: Positive CAM score (Y)                                                                     |
| 122           | Rudolph, 2005     | Delirium: CAM, digit span, DSI, MDAS, MMSE                                                                                                                          | Delirium: Positive CAM score (Features 1 and 2 are present and either Feature 3 or 4 is present) (Y) |
| 123           | Rudolph, 2006     | Delirium: CAM (CAM-ICU for postoperatively intubated patients), digit span, DSI, MDAS, MMSE                                                                         | Delirium: Positive CAM score (Features 1 and 2 are present and either Feature 3 or 4 is present) (Y) |

| Reference No. | Lead Author, Year | Instruments                                                                                                              | Definitions of Cognitive Decline and Delirium (Standardized Delirium Measurement Tool: Y/N)                       |
|---------------|-------------------|--------------------------------------------------------------------------------------------------------------------------|-------------------------------------------------------------------------------------------------------------------|
| 124           | Rudolph, 2009     | Delirium: CAM, digit span, DSI, MDAS, MMSE                                                                               | Delirium: Positive CAM score (Features 1 and 2 are present and either Feature 3 or 4 is present) (Y)              |
| 125           | Sahan, 2018       | Cognition: WMS logical memory, clock drawing test, word list generation test, digit span, visuomotor spatial skills test | Cognition: 1 SD method ( $\geq 2$ tests)                                                                          |
| 6             | Santos, 2004      | Delirium: DSM-IV                                                                                                         | Delirium: Diagnosed by geriatrician based on DSM-IV criteria, in addition to notes from nurses and physicians (N) |
| 126           | Scott, 2002       | Cognition: WMS-R logical memory (I & II), altered form of WMS-R digit span, trails A & B, COWAT                          | Cognition: 1 SD method ( $< 20\%$ tests), 1 SD method                                                             |
| 127           | Sevuk, 2015       | Delirium: DRS-R-98 (for severity), ICDSC                                                                                 | Delirium: ICDSC score $\geq 4$ (Y)                                                                                |
| 128           | Siepe, 2011       | Delirium: MMSE, psychologist assessment                                                                                  | Delirium: 10 point drop or more on MMSE from pre-op and a positive assessment by a psychologist (N)               |

| Reference No. | Lead Author, Year | Instruments                                                                                                                                                              | Definitions of Cognitive Decline and Delirium (Standardized Delirium Measurement Tool: Y/N) |
|---------------|-------------------|--------------------------------------------------------------------------------------------------------------------------------------------------------------------------|---------------------------------------------------------------------------------------------|
| 129           | Silbert, 2006     | Cognition: CERAD AVLT, digit symbol, Trails A & B, COWAT, semantic fluency test, grooved pegboard test (dom & non-dom)                                                   | Cognition: 1 SD method and 20% method ( $\geq 2$ tests)                                     |
| 130           | Silbert, 2008     | Cognition: CERAD AVLT, Digit symbol, Trails A & B, COWAT, semantic fluency test, grooved pegboard test (dom & non-dom)                                                   | Cognition: 1 SD method ( $\geq 2$ tests)                                                    |
| 131           | Slater, 2009      | Cognition: MMSE, Trails A & B, HVLT (trials 1, 2, 3, B & C), grooved pegboard (dom & non-dom), stroop test (part C & CW)                                                 | Cognition: 1 SD method ( $< 20\%$ tests)                                                    |
|               |                   | Delirium: DRS                                                                                                                                                            | Delirium: Based on DRS (Y)                                                                  |
| 132           | Smith, 1986       | Cognition: WAIS vocab and picture completion subtests, RAVLT, block design, grooved pegboard, trails A & B, letter cancellation, digit symbol replacement, two-choice RT | Cognition: 1 SD method                                                                      |



| Reference No. | Lead Author, Year | Instruments                                                                                                                                                                               | Definitions of Cognitive Decline and Delirium (Standardized Delirium Measurement Tool: Y/N) |
|---------------|-------------------|-------------------------------------------------------------------------------------------------------------------------------------------------------------------------------------------|---------------------------------------------------------------------------------------------|
| 133           | Smith, 2000       | Cognition: RAVLT, Rey auditory nonverbal memory, Trails A & B, letter cancellation, symbol-digit replacement, visual RT, grooved pegboard (dom & non-dom), finger tapping (dom & non-dom) | Cognition: 20% method ( $\geq 2$ tests)                                                     |
| 134           | Stump, 1996       | Cognition: Trails A & B, grooved pegboard (dom & non-dom), finger tapping (dom & non-dom), symbol digit, letter cancellation, visual RT, verbal and nonverbal memory                      | Cognition: 20% method ( $\geq 2$ tests)                                                     |
| 135           | Subramaniam, 2019 | Delirium: CAM, CAM-ICU                                                                                                                                                                    | Delirium: Positive CAM or CAM-ICU score (Y)                                                 |
| 136           | Suksompong, 2002  | Cognition: Thai Mental State Exam                                                                                                                                                         | Cognition: Miscellaneous                                                                    |
| 137           | Swaminathan, 2002 | Cognition: Randt short story (immediate & delay), digit symbol, trails B, digit span (forward & backward), figural memory (immediate & delayed)                                           | Cognition: 1 SD method (domain)                                                             |

| Reference No. | Lead Author, Year | Instruments                                                                                                                                                                                                                                                        | Definitions of Cognitive Decline and Delirium (Standardized Delirium Measurement Tool: Y/N) |
|---------------|-------------------|--------------------------------------------------------------------------------------------------------------------------------------------------------------------------------------------------------------------------------------------------------------------|---------------------------------------------------------------------------------------------|
| 138           | Sylivris, 1998    | Cognition: WAIS-R general information questionnaire, digit span, digit symbol, RAVLT, COWAT                                                                                                                                                                        | Cognition: Miscellaneous                                                                    |
| 139           | Tagarakis, 2007   | Delirium: DRS                                                                                                                                                                                                                                                      | Delirium: Based on DRS, which was performed on patients suspected to develop delirium (Y)   |
| 140           | Tamura, 2019      | Delirium: ICDSC                                                                                                                                                                                                                                                    | Delirium: ICDSC >3                                                                          |
| 141           | Toeg, 2013        | Cognition: Buschke selective reminding or RAVLT, WAIS-R digit span, finger tapping task, letter and category fluency, trails A & B, grooved pegboard, symbol digit modalities                                                                                      | Cognition: 1 SD method (domain)                                                             |
| 142           | Trubnikova, 2014  | Cognition: Complex visuomotor reaction (reaction time, number of errors), functional mobility of nervous processes and performance of brain responses to feedback (reaction time, number of errors, missed signals), Bourdons test, visual short-term memory tests | Cognition: 20% method                                                                       |

| Reference No. | Lead Author, Year | Instruments                                                                                                                  | Definitions of Cognitive Decline and Delirium (Standardized Delirium Measurement Tool: Y/N)                                                                                                                                             |
|---------------|-------------------|------------------------------------------------------------------------------------------------------------------------------|-----------------------------------------------------------------------------------------------------------------------------------------------------------------------------------------------------------------------------------------|
|               |                   | (memorisation of 10 numbers, 10 words, 10 nonsense syllables)                                                                |                                                                                                                                                                                                                                         |
| 143           | Tully, 2010       | Delirium: DSI, DSM-IV-TR, SPMSQ                                                                                              | Delirium: Classification based on DSM-IV-TR criteria. Evidence of perceptual disturbance and/or language disturbance was requisite for a delirium diagnosis. Neurology assessments, SPMSQ results and medical notes also evaluated. (N) |
| 144           | van Dijk, 2004    | Cognition: RAVLT-L, RAVLT-R, grooved pegboard, trails A & B, Sternberg memory comparison, line orientation test, stroop test | Cognition: 20% method                                                                                                                                                                                                                   |
| 145           | Yilmaz, 2016      | Delirium: CAM-ICU                                                                                                            | Delirium: Positive CAM-ICU score (Features 1 and 2 are present and either Feature 3 or 4 is present) (Y)                                                                                                                                |
| 146           | Zhang, 2015       | Delirium: CAM-ICU, RASS                                                                                                      | Delirium: Positive CAM-ICU score (Features 1 and 2 are present and either Feature 3 or 4 is present) (Y)                                                                                                                                |

---

| Reference No. | Lead Author, Year | Instruments | Definitions of Cognitive Decline and Delirium<br>(Standardized Delirium Measurement Tool: Y/N) |
|---------------|-------------------|-------------|------------------------------------------------------------------------------------------------|
|---------------|-------------------|-------------|------------------------------------------------------------------------------------------------|

---

*Note. see Supplementary Table 9 for glossary of instrument acronyms*

**Table S9. Glossary of abbreviations.**

| <b>Cognitive Impairment</b> |                                                                |
|-----------------------------|----------------------------------------------------------------|
| <b>AVLT</b>                 | Auditory Verbal Learning Test                                  |
| <b>CDR</b>                  | Clinical Dementia Rating scale                                 |
| <b>CERAD</b>                | The Consortium to Establish a Registry for Alzheimer's Disease |
| <b>COWAT</b>                | Controlled Oral Word Association Test                          |
| <b>CST</b>                  | Concept Shifting Test                                          |
| <b>CVLT</b>                 | California Verbal Learning Test                                |
| <b>Digit symbol</b>         | Digit Symbol Substitution Task                                 |
| <b>HDS</b>                  | Hasegawa Dementia Scale                                        |
| <b>HVLT</b>                 | Hopkins Verbal Learning Test                                   |
| <b>LDCT</b>                 | Letter-Digit Coding Test                                       |
| <b>MMSE</b>                 | Mini Mental State Examination                                  |
| <b>MoCA</b>                 | Montreal Cognitive Assessment                                  |
| <b>NAB</b>                  | Neuropsychological Assessment Battery                          |
| <b>NART</b>                 | National Adult Reading Test                                    |
| <b>PASAT</b>                | Paced Auditory Serial Addition Task                            |
| <b>Randt short story</b>    | Randt Memory Test Short-Story Module                           |
| <b>RAVLT</b>                | Rey Auditory Verbal Learning Test                              |
| <b>RAVLT-L</b>              | Rey Auditory-Verbal Learning – Learning Trial                  |
| <b>RAVLT-R</b>              | Rey Auditory-Verbal Learning – Recognition Trial               |
| <b>RCPM</b>                 | Raven Coloured Progressive Matrices                            |
| <b>RT</b>                   | Reaction Time                                                  |
| <b>Stroop test</b>          | Stroop Colour Word Interference Test                           |
| <b>Trails A &amp; B</b>     | Halstead-Reitan Trail-making tests A & B                       |

|             |                                   |
|-------------|-----------------------------------|
| <b>VVLT</b> | Visual Verbal Learning Test       |
| <b>WAIS</b> | Wechsler Adult Intelligence Scale |
| <b>WMS</b>  | Wechsler Memory Scale             |

---

**Delirium**

---

|                  |                                                                                          |
|------------------|------------------------------------------------------------------------------------------|
| <b>aDST</b>      | abbreviated Digit Span Test                                                              |
| <b>APA</b>       | American Psychiatric Association                                                         |
| <b>CAM</b>       | Confusion Assessment Method                                                              |
| <b>CAM-ICU</b>   | Confusion Assessment Method for the ICU                                                  |
| <b>DI</b>        | Delirium Index                                                                           |
| <b>DOS</b>       | Delirium Observation Screening scale                                                     |
| <b>DRS</b>       | Delirium Rating Scale                                                                    |
| <b>DRS-R-98</b>  | Delirium Rating Scale Revised-98                                                         |
| <b>DSI</b>       | Delirium Symptom Interview                                                               |
| <b>DSM-III-R</b> | Diagnostic and Statistical Manual of Mental Disorders 3 <sup>rd</sup> ed., Revised.      |
| <b>DSM-IV</b>    | Diagnostic and Statistical Manual of Mental Disorders 4 <sup>th</sup> ed.                |
| <b>DSM-IV-TR</b> | Diagnostic and Statistical Manual of Mental Disorders 4 <sup>th</sup> ed., Text Revision |
| <b>DSS</b>       | Definition that is specific to the study                                                 |
| <b>ICDSC</b>     | The Intensive Care Delirium Screening Checklist                                          |
| <b>MDAS</b>      | Memorial Delirium Assessment Scale                                                       |
| <b>MMSE</b>      | Mini Mental State Examination                                                            |
| <b>OBS</b>       | Organic Brain Syndrome scale                                                             |
| <b>RASS</b>      | The Richmond Agitation Sedation Scale                                                    |
| <b>SPMSQ</b>     | Short Portable Mental Status Questionnaire                                               |
| <b>STS</b>       | Accordance with Society of Thoracic Surgeons                                             |

---

**Figure S1. Forest plots for delirium post-CABG analyses.**

| Variable                           | Forest Plot                                                                                                                                                                                                                                                                                                                                                                                                                                                                                                                                                                                                                                                                                                                                                                                                                                                                                                                                                                                                                                                                                                                                                                                                                                                                                                                                                                                                                                                                                                                                                                                                                                                                                                                                                                                                                                                                                                                                                                                                                                                                                                                                                                                         |              |                           |               |              |                       |  |                       |            |             |             |         |         |              |       |       |       |        |       |  |                 |       |       |       |        |       |               |       |       |        |        |       |                |       |       |       |        |       |                   |       |       |        |       |       |                   |       |       |       |        |       |                   |              |              |              |               |              |               |              |              |              |              |              |              |       |       |       |       |       |              |       |       |       |       |       |                |       |       |       |       |       |          |       |       |       |       |       |               |       |       |       |       |       |                      |       |       |        |       |       |             |       |       |        |       |       |              |              |              |              |              |              |
|------------------------------------|-----------------------------------------------------------------------------------------------------------------------------------------------------------------------------------------------------------------------------------------------------------------------------------------------------------------------------------------------------------------------------------------------------------------------------------------------------------------------------------------------------------------------------------------------------------------------------------------------------------------------------------------------------------------------------------------------------------------------------------------------------------------------------------------------------------------------------------------------------------------------------------------------------------------------------------------------------------------------------------------------------------------------------------------------------------------------------------------------------------------------------------------------------------------------------------------------------------------------------------------------------------------------------------------------------------------------------------------------------------------------------------------------------------------------------------------------------------------------------------------------------------------------------------------------------------------------------------------------------------------------------------------------------------------------------------------------------------------------------------------------------------------------------------------------------------------------------------------------------------------------------------------------------------------------------------------------------------------------------------------------------------------------------------------------------------------------------------------------------------------------------------------------------------------------------------------------------|--------------|---------------------------|---------------|--------------|-----------------------|--|-----------------------|------------|-------------|-------------|---------|---------|--------------|-------|-------|-------|--------|-------|--|-----------------|-------|-------|-------|--------|-------|---------------|-------|-------|--------|--------|-------|----------------|-------|-------|-------|--------|-------|-------------------|-------|-------|--------|-------|-------|-------------------|-------|-------|-------|--------|-------|-------------------|--------------|--------------|--------------|---------------|--------------|---------------|--------------|--------------|--------------|--------------|--------------|--------------|-------|-------|-------|-------|-------|--------------|-------|-------|-------|-------|-------|----------------|-------|-------|-------|-------|-------|----------|-------|-------|-------|-------|-------|---------------|-------|-------|-------|-------|-------|----------------------|-------|-------|--------|-------|-------|-------------|-------|-------|--------|-------|-------|--------------|--------------|--------------|--------------|--------------|--------------|
| <b>Pre-Operative (Categorical)</b> |                                                                                                                                                                                                                                                                                                                                                                                                                                                                                                                                                                                                                                                                                                                                                                                                                                                                                                                                                                                                                                                                                                                                                                                                                                                                                                                                                                                                                                                                                                                                                                                                                                                                                                                                                                                                                                                                                                                                                                                                                                                                                                                                                                                                     |              |                           |               |              |                       |  |                       |            |             |             |         |         |              |       |       |       |        |       |  |                 |       |       |       |        |       |               |       |       |        |        |       |                |       |       |       |        |       |                   |       |       |        |       |       |                   |       |       |       |        |       |                   |              |              |              |               |              |               |              |              |              |              |              |              |       |       |       |       |       |              |       |       |       |       |       |                |       |       |       |       |       |          |       |       |       |       |       |               |       |       |       |       |       |                      |       |       |        |       |       |             |       |       |        |       |       |              |              |              |              |              |              |
| Alcoholism                         | <table border="1"> <thead> <tr> <th rowspan="2">Study name</th> <th colspan="5">Statistics for each study</th> <th rowspan="2">Odds ratio and 95% CI</th> </tr> <tr> <th>Odds ratio</th> <th>Lower limit</th> <th>Upper limit</th> <th>Z-Value</th> <th>p-Value</th> </tr> </thead> <tbody> <tr> <td>Dong, 2014</td> <td>1.057</td> <td>0.362</td> <td>3.084</td> <td>0.101</td> <td>0.919</td> <td rowspan="7"> </td> </tr> <tr> <td>Humphreys, 2016</td> <td>1.280</td> <td>0.390</td> <td>4.206</td> <td>0.407</td> <td>0.684</td> </tr> <tr> <td>Loponen, 2008</td> <td>8.235</td> <td>0.711</td> <td>95.421</td> <td>1.687</td> <td>0.092</td> </tr> <tr> <td>Mu, 2010</td> <td>0.557</td> <td>0.265</td> <td>1.171</td> <td>-1.543</td> <td>0.123</td> </tr> <tr> <td>Ringaitiene, 2015</td> <td>1.487</td> <td>0.071</td> <td>31.270</td> <td>0.256</td> <td>0.798</td> </tr> <tr> <td>Rolfson, 1999a</td> <td>0.375</td> <td>0.038</td> <td>3.699</td> <td>-0.840</td> <td>0.401</td> </tr> <tr> <td><b>Total</b></td> <td><b>0.899</b></td> <td><b>0.500</b></td> <td><b>1.615</b></td> <td><b>-0.357</b></td> <td><b>0.721</b></td> </tr> </tbody> </table>                                                                                                                                                                                                                                                                                                                                                                                                                                                                                                                                                                                                                                                                                                                                                                                                                                                                                                                                                                                                                               | Study name   | Statistics for each study |               |              |                       |  | Odds ratio and 95% CI | Odds ratio | Lower limit | Upper limit | Z-Value | p-Value | Dong, 2014   | 1.057 | 0.362 | 3.084 | 0.101  | 0.919 |  | Humphreys, 2016 | 1.280 | 0.390 | 4.206 | 0.407  | 0.684 | Loponen, 2008 | 8.235 | 0.711 | 95.421 | 1.687  | 0.092 | Mu, 2010       | 0.557 | 0.265 | 1.171 | -1.543 | 0.123 | Ringaitiene, 2015 | 1.487 | 0.071 | 31.270 | 0.256 | 0.798 | Rolfson, 1999a    | 0.375 | 0.038 | 3.699 | -0.840 | 0.401 | <b>Total</b>      | <b>0.899</b> | <b>0.500</b> | <b>1.615</b> | <b>-0.357</b> | <b>0.721</b> |               |              |              |              |              |              |              |       |       |       |       |       |              |       |       |       |       |       |                |       |       |       |       |       |          |       |       |       |       |       |               |       |       |       |       |       |                      |       |       |        |       |       |             |       |       |        |       |       |              |              |              |              |              |              |
| Study name                         | Statistics for each study                                                                                                                                                                                                                                                                                                                                                                                                                                                                                                                                                                                                                                                                                                                                                                                                                                                                                                                                                                                                                                                                                                                                                                                                                                                                                                                                                                                                                                                                                                                                                                                                                                                                                                                                                                                                                                                                                                                                                                                                                                                                                                                                                                           |              |                           |               |              | Odds ratio and 95% CI |  |                       |            |             |             |         |         |              |       |       |       |        |       |  |                 |       |       |       |        |       |               |       |       |        |        |       |                |       |       |       |        |       |                   |       |       |        |       |       |                   |       |       |       |        |       |                   |              |              |              |               |              |               |              |              |              |              |              |              |       |       |       |       |       |              |       |       |       |       |       |                |       |       |       |       |       |          |       |       |       |       |       |               |       |       |       |       |       |                      |       |       |        |       |       |             |       |       |        |       |       |              |              |              |              |              |              |
|                                    | Odds ratio                                                                                                                                                                                                                                                                                                                                                                                                                                                                                                                                                                                                                                                                                                                                                                                                                                                                                                                                                                                                                                                                                                                                                                                                                                                                                                                                                                                                                                                                                                                                                                                                                                                                                                                                                                                                                                                                                                                                                                                                                                                                                                                                                                                          | Lower limit  | Upper limit               | Z-Value       | p-Value      |                       |  |                       |            |             |             |         |         |              |       |       |       |        |       |  |                 |       |       |       |        |       |               |       |       |        |        |       |                |       |       |       |        |       |                   |       |       |        |       |       |                   |       |       |       |        |       |                   |              |              |              |               |              |               |              |              |              |              |              |              |       |       |       |       |       |              |       |       |       |       |       |                |       |       |       |       |       |          |       |       |       |       |       |               |       |       |       |       |       |                      |       |       |        |       |       |             |       |       |        |       |       |              |              |              |              |              |              |
| Dong, 2014                         | 1.057                                                                                                                                                                                                                                                                                                                                                                                                                                                                                                                                                                                                                                                                                                                                                                                                                                                                                                                                                                                                                                                                                                                                                                                                                                                                                                                                                                                                                                                                                                                                                                                                                                                                                                                                                                                                                                                                                                                                                                                                                                                                                                                                                                                               | 0.362        | 3.084                     | 0.101         | 0.919        |                       |  |                       |            |             |             |         |         |              |       |       |       |        |       |  |                 |       |       |       |        |       |               |       |       |        |        |       |                |       |       |       |        |       |                   |       |       |        |       |       |                   |       |       |       |        |       |                   |              |              |              |               |              |               |              |              |              |              |              |              |       |       |       |       |       |              |       |       |       |       |       |                |       |       |       |       |       |          |       |       |       |       |       |               |       |       |       |       |       |                      |       |       |        |       |       |             |       |       |        |       |       |              |              |              |              |              |              |
| Humphreys, 2016                    | 1.280                                                                                                                                                                                                                                                                                                                                                                                                                                                                                                                                                                                                                                                                                                                                                                                                                                                                                                                                                                                                                                                                                                                                                                                                                                                                                                                                                                                                                                                                                                                                                                                                                                                                                                                                                                                                                                                                                                                                                                                                                                                                                                                                                                                               | 0.390        | 4.206                     | 0.407         | 0.684        |                       |  |                       |            |             |             |         |         |              |       |       |       |        |       |  |                 |       |       |       |        |       |               |       |       |        |        |       |                |       |       |       |        |       |                   |       |       |        |       |       |                   |       |       |       |        |       |                   |              |              |              |               |              |               |              |              |              |              |              |              |       |       |       |       |       |              |       |       |       |       |       |                |       |       |       |       |       |          |       |       |       |       |       |               |       |       |       |       |       |                      |       |       |        |       |       |             |       |       |        |       |       |              |              |              |              |              |              |
| Loponen, 2008                      | 8.235                                                                                                                                                                                                                                                                                                                                                                                                                                                                                                                                                                                                                                                                                                                                                                                                                                                                                                                                                                                                                                                                                                                                                                                                                                                                                                                                                                                                                                                                                                                                                                                                                                                                                                                                                                                                                                                                                                                                                                                                                                                                                                                                                                                               | 0.711        | 95.421                    | 1.687         | 0.092        |                       |  |                       |            |             |             |         |         |              |       |       |       |        |       |  |                 |       |       |       |        |       |               |       |       |        |        |       |                |       |       |       |        |       |                   |       |       |        |       |       |                   |       |       |       |        |       |                   |              |              |              |               |              |               |              |              |              |              |              |              |       |       |       |       |       |              |       |       |       |       |       |                |       |       |       |       |       |          |       |       |       |       |       |               |       |       |       |       |       |                      |       |       |        |       |       |             |       |       |        |       |       |              |              |              |              |              |              |
| Mu, 2010                           | 0.557                                                                                                                                                                                                                                                                                                                                                                                                                                                                                                                                                                                                                                                                                                                                                                                                                                                                                                                                                                                                                                                                                                                                                                                                                                                                                                                                                                                                                                                                                                                                                                                                                                                                                                                                                                                                                                                                                                                                                                                                                                                                                                                                                                                               | 0.265        | 1.171                     | -1.543        | 0.123        |                       |  |                       |            |             |             |         |         |              |       |       |       |        |       |  |                 |       |       |       |        |       |               |       |       |        |        |       |                |       |       |       |        |       |                   |       |       |        |       |       |                   |       |       |       |        |       |                   |              |              |              |               |              |               |              |              |              |              |              |              |       |       |       |       |       |              |       |       |       |       |       |                |       |       |       |       |       |          |       |       |       |       |       |               |       |       |       |       |       |                      |       |       |        |       |       |             |       |       |        |       |       |              |              |              |              |              |              |
| Ringaitiene, 2015                  | 1.487                                                                                                                                                                                                                                                                                                                                                                                                                                                                                                                                                                                                                                                                                                                                                                                                                                                                                                                                                                                                                                                                                                                                                                                                                                                                                                                                                                                                                                                                                                                                                                                                                                                                                                                                                                                                                                                                                                                                                                                                                                                                                                                                                                                               | 0.071        | 31.270                    | 0.256         | 0.798        |                       |  |                       |            |             |             |         |         |              |       |       |       |        |       |  |                 |       |       |       |        |       |               |       |       |        |        |       |                |       |       |       |        |       |                   |       |       |        |       |       |                   |       |       |       |        |       |                   |              |              |              |               |              |               |              |              |              |              |              |              |       |       |       |       |       |              |       |       |       |       |       |                |       |       |       |       |       |          |       |       |       |       |       |               |       |       |       |       |       |                      |       |       |        |       |       |             |       |       |        |       |       |              |              |              |              |              |              |
| Rolfson, 1999a                     | 0.375                                                                                                                                                                                                                                                                                                                                                                                                                                                                                                                                                                                                                                                                                                                                                                                                                                                                                                                                                                                                                                                                                                                                                                                                                                                                                                                                                                                                                                                                                                                                                                                                                                                                                                                                                                                                                                                                                                                                                                                                                                                                                                                                                                                               | 0.038        | 3.699                     | -0.840        | 0.401        |                       |  |                       |            |             |             |         |         |              |       |       |       |        |       |  |                 |       |       |       |        |       |               |       |       |        |        |       |                |       |       |       |        |       |                   |       |       |        |       |       |                   |       |       |       |        |       |                   |              |              |              |               |              |               |              |              |              |              |              |              |       |       |       |       |       |              |       |       |       |       |       |                |       |       |       |       |       |          |       |       |       |       |       |               |       |       |       |       |       |                      |       |       |        |       |       |             |       |       |        |       |       |              |              |              |              |              |              |
| <b>Total</b>                       | <b>0.899</b>                                                                                                                                                                                                                                                                                                                                                                                                                                                                                                                                                                                                                                                                                                                                                                                                                                                                                                                                                                                                                                                                                                                                                                                                                                                                                                                                                                                                                                                                                                                                                                                                                                                                                                                                                                                                                                                                                                                                                                                                                                                                                                                                                                                        | <b>0.500</b> | <b>1.615</b>              | <b>-0.357</b> | <b>0.721</b> |                       |  |                       |            |             |             |         |         |              |       |       |       |        |       |  |                 |       |       |       |        |       |               |       |       |        |        |       |                |       |       |       |        |       |                   |       |       |        |       |       |                   |       |       |       |        |       |                   |              |              |              |               |              |               |              |              |              |              |              |              |       |       |       |       |       |              |       |       |       |       |       |                |       |       |       |       |       |          |       |       |       |       |       |               |       |       |       |       |       |                      |       |       |        |       |       |             |       |       |        |       |       |              |              |              |              |              |              |
| Arrhythmia, incl. AF               | <table border="1"> <thead> <tr> <th rowspan="2">Study name</th> <th colspan="5">Statistics for each study</th> <th rowspan="2">Odds ratio and 95% CI</th> </tr> <tr> <th>Odds ratio</th> <th>Lower limit</th> <th>Upper limit</th> <th>Z-Value</th> <th>p-Value</th> </tr> </thead> <tbody> <tr> <td>Caldas, 2019</td> <td>0.719</td> <td>0.075</td> <td>6.915</td> <td>-0.286</td> <td>0.775</td> <td rowspan="17"> </td> </tr> <tr> <td>Coffey, 1983</td> <td>0.629</td> <td>0.149</td> <td>2.652</td> <td>-0.632</td> <td>0.528</td> </tr> <tr> <td>Dong, 2014</td> <td>1.310</td> <td>0.519</td> <td>3.303</td> <td>0.571</td> <td>0.568</td> </tr> <tr> <td>Eriksson, 2002</td> <td>0.258</td> <td>0.013</td> <td>5.012</td> <td>-0.895</td> <td>0.371</td> </tr> <tr> <td>Gottesman, 2010</td> <td>2.363</td> <td>1.647</td> <td>3.392</td> <td>4.665</td> <td>0.000</td> </tr> <tr> <td>Kazmierski, 2014a</td> <td>2.361</td> <td>0.597</td> <td>9.343</td> <td>1.224</td> <td>0.221</td> </tr> <tr> <td>Kazmierski, 2014b</td> <td>2.778</td> <td>0.497</td> <td>15.517</td> <td>1.164</td> <td>0.244</td> </tr> <tr> <td>Mardani, 2012</td> <td>4.519</td> <td>1.041</td> <td>19.614</td> <td>2.014</td> <td>0.044</td> </tr> <tr> <td>Martin, 2010</td> <td>1.883</td> <td>1.522</td> <td>2.330</td> <td>5.824</td> <td>0.000</td> </tr> <tr> <td>Martin, 2012</td> <td>2.070</td> <td>1.575</td> <td>2.720</td> <td>5.218</td> <td>0.000</td> </tr> <tr> <td>Miyazaki, 2011</td> <td>2.728</td> <td>1.283</td> <td>5.799</td> <td>2.608</td> <td>0.009</td> </tr> <tr> <td>Mu, 2010</td> <td>1.271</td> <td>0.703</td> <td>2.299</td> <td>0.794</td> <td>0.427</td> </tr> <tr> <td>Nikolic, 2012</td> <td>1.933</td> <td>0.946</td> <td>3.951</td> <td>1.808</td> <td>0.071</td> </tr> <tr> <td>Santana Santos, 2004</td> <td>3.454</td> <td>0.802</td> <td>14.872</td> <td>1.664</td> <td>0.096</td> </tr> <tr> <td>Zhang, 2015</td> <td>5.103</td> <td>2.535</td> <td>10.269</td> <td>4.567</td> <td>0.000</td> </tr> <tr> <td><b>Total</b></td> <td><b>2.068</b></td> <td><b>1.700</b></td> <td><b>2.514</b></td> <td><b>7.277</b></td> <td><b>0.000</b></td> </tr> </tbody> </table> | Study name   | Statistics for each study |               |              |                       |  | Odds ratio and 95% CI | Odds ratio | Lower limit | Upper limit | Z-Value | p-Value | Caldas, 2019 | 0.719 | 0.075 | 6.915 | -0.286 | 0.775 |  | Coffey, 1983    | 0.629 | 0.149 | 2.652 | -0.632 | 0.528 | Dong, 2014    | 1.310 | 0.519 | 3.303  | 0.571  | 0.568 | Eriksson, 2002 | 0.258 | 0.013 | 5.012 | -0.895 | 0.371 | Gottesman, 2010   | 2.363 | 1.647 | 3.392  | 4.665 | 0.000 | Kazmierski, 2014a | 2.361 | 0.597 | 9.343 | 1.224  | 0.221 | Kazmierski, 2014b | 2.778        | 0.497        | 15.517       | 1.164         | 0.244        | Mardani, 2012 | 4.519        | 1.041        | 19.614       | 2.014        | 0.044        | Martin, 2010 | 1.883 | 1.522 | 2.330 | 5.824 | 0.000 | Martin, 2012 | 2.070 | 1.575 | 2.720 | 5.218 | 0.000 | Miyazaki, 2011 | 2.728 | 1.283 | 5.799 | 2.608 | 0.009 | Mu, 2010 | 1.271 | 0.703 | 2.299 | 0.794 | 0.427 | Nikolic, 2012 | 1.933 | 0.946 | 3.951 | 1.808 | 0.071 | Santana Santos, 2004 | 3.454 | 0.802 | 14.872 | 1.664 | 0.096 | Zhang, 2015 | 5.103 | 2.535 | 10.269 | 4.567 | 0.000 | <b>Total</b> | <b>2.068</b> | <b>1.700</b> | <b>2.514</b> | <b>7.277</b> | <b>0.000</b> |
| Study name                         | Statistics for each study                                                                                                                                                                                                                                                                                                                                                                                                                                                                                                                                                                                                                                                                                                                                                                                                                                                                                                                                                                                                                                                                                                                                                                                                                                                                                                                                                                                                                                                                                                                                                                                                                                                                                                                                                                                                                                                                                                                                                                                                                                                                                                                                                                           |              |                           |               |              | Odds ratio and 95% CI |  |                       |            |             |             |         |         |              |       |       |       |        |       |  |                 |       |       |       |        |       |               |       |       |        |        |       |                |       |       |       |        |       |                   |       |       |        |       |       |                   |       |       |       |        |       |                   |              |              |              |               |              |               |              |              |              |              |              |              |       |       |       |       |       |              |       |       |       |       |       |                |       |       |       |       |       |          |       |       |       |       |       |               |       |       |       |       |       |                      |       |       |        |       |       |             |       |       |        |       |       |              |              |              |              |              |              |
|                                    | Odds ratio                                                                                                                                                                                                                                                                                                                                                                                                                                                                                                                                                                                                                                                                                                                                                                                                                                                                                                                                                                                                                                                                                                                                                                                                                                                                                                                                                                                                                                                                                                                                                                                                                                                                                                                                                                                                                                                                                                                                                                                                                                                                                                                                                                                          | Lower limit  | Upper limit               | Z-Value       | p-Value      |                       |  |                       |            |             |             |         |         |              |       |       |       |        |       |  |                 |       |       |       |        |       |               |       |       |        |        |       |                |       |       |       |        |       |                   |       |       |        |       |       |                   |       |       |       |        |       |                   |              |              |              |               |              |               |              |              |              |              |              |              |       |       |       |       |       |              |       |       |       |       |       |                |       |       |       |       |       |          |       |       |       |       |       |               |       |       |       |       |       |                      |       |       |        |       |       |             |       |       |        |       |       |              |              |              |              |              |              |
| Caldas, 2019                       | 0.719                                                                                                                                                                                                                                                                                                                                                                                                                                                                                                                                                                                                                                                                                                                                                                                                                                                                                                                                                                                                                                                                                                                                                                                                                                                                                                                                                                                                                                                                                                                                                                                                                                                                                                                                                                                                                                                                                                                                                                                                                                                                                                                                                                                               | 0.075        | 6.915                     | -0.286        | 0.775        |                       |  |                       |            |             |             |         |         |              |       |       |       |        |       |  |                 |       |       |       |        |       |               |       |       |        |        |       |                |       |       |       |        |       |                   |       |       |        |       |       |                   |       |       |       |        |       |                   |              |              |              |               |              |               |              |              |              |              |              |              |       |       |       |       |       |              |       |       |       |       |       |                |       |       |       |       |       |          |       |       |       |       |       |               |       |       |       |       |       |                      |       |       |        |       |       |             |       |       |        |       |       |              |              |              |              |              |              |
| Coffey, 1983                       | 0.629                                                                                                                                                                                                                                                                                                                                                                                                                                                                                                                                                                                                                                                                                                                                                                                                                                                                                                                                                                                                                                                                                                                                                                                                                                                                                                                                                                                                                                                                                                                                                                                                                                                                                                                                                                                                                                                                                                                                                                                                                                                                                                                                                                                               | 0.149        | 2.652                     | -0.632        | 0.528        |                       |  |                       |            |             |             |         |         |              |       |       |       |        |       |  |                 |       |       |       |        |       |               |       |       |        |        |       |                |       |       |       |        |       |                   |       |       |        |       |       |                   |       |       |       |        |       |                   |              |              |              |               |              |               |              |              |              |              |              |              |       |       |       |       |       |              |       |       |       |       |       |                |       |       |       |       |       |          |       |       |       |       |       |               |       |       |       |       |       |                      |       |       |        |       |       |             |       |       |        |       |       |              |              |              |              |              |              |
| Dong, 2014                         | 1.310                                                                                                                                                                                                                                                                                                                                                                                                                                                                                                                                                                                                                                                                                                                                                                                                                                                                                                                                                                                                                                                                                                                                                                                                                                                                                                                                                                                                                                                                                                                                                                                                                                                                                                                                                                                                                                                                                                                                                                                                                                                                                                                                                                                               | 0.519        | 3.303                     | 0.571         | 0.568        |                       |  |                       |            |             |             |         |         |              |       |       |       |        |       |  |                 |       |       |       |        |       |               |       |       |        |        |       |                |       |       |       |        |       |                   |       |       |        |       |       |                   |       |       |       |        |       |                   |              |              |              |               |              |               |              |              |              |              |              |              |       |       |       |       |       |              |       |       |       |       |       |                |       |       |       |       |       |          |       |       |       |       |       |               |       |       |       |       |       |                      |       |       |        |       |       |             |       |       |        |       |       |              |              |              |              |              |              |
| Eriksson, 2002                     | 0.258                                                                                                                                                                                                                                                                                                                                                                                                                                                                                                                                                                                                                                                                                                                                                                                                                                                                                                                                                                                                                                                                                                                                                                                                                                                                                                                                                                                                                                                                                                                                                                                                                                                                                                                                                                                                                                                                                                                                                                                                                                                                                                                                                                                               | 0.013        | 5.012                     | -0.895        | 0.371        |                       |  |                       |            |             |             |         |         |              |       |       |       |        |       |  |                 |       |       |       |        |       |               |       |       |        |        |       |                |       |       |       |        |       |                   |       |       |        |       |       |                   |       |       |       |        |       |                   |              |              |              |               |              |               |              |              |              |              |              |              |       |       |       |       |       |              |       |       |       |       |       |                |       |       |       |       |       |          |       |       |       |       |       |               |       |       |       |       |       |                      |       |       |        |       |       |             |       |       |        |       |       |              |              |              |              |              |              |
| Gottesman, 2010                    | 2.363                                                                                                                                                                                                                                                                                                                                                                                                                                                                                                                                                                                                                                                                                                                                                                                                                                                                                                                                                                                                                                                                                                                                                                                                                                                                                                                                                                                                                                                                                                                                                                                                                                                                                                                                                                                                                                                                                                                                                                                                                                                                                                                                                                                               | 1.647        | 3.392                     | 4.665         | 0.000        |                       |  |                       |            |             |             |         |         |              |       |       |       |        |       |  |                 |       |       |       |        |       |               |       |       |        |        |       |                |       |       |       |        |       |                   |       |       |        |       |       |                   |       |       |       |        |       |                   |              |              |              |               |              |               |              |              |              |              |              |              |       |       |       |       |       |              |       |       |       |       |       |                |       |       |       |       |       |          |       |       |       |       |       |               |       |       |       |       |       |                      |       |       |        |       |       |             |       |       |        |       |       |              |              |              |              |              |              |
| Kazmierski, 2014a                  | 2.361                                                                                                                                                                                                                                                                                                                                                                                                                                                                                                                                                                                                                                                                                                                                                                                                                                                                                                                                                                                                                                                                                                                                                                                                                                                                                                                                                                                                                                                                                                                                                                                                                                                                                                                                                                                                                                                                                                                                                                                                                                                                                                                                                                                               | 0.597        | 9.343                     | 1.224         | 0.221        |                       |  |                       |            |             |             |         |         |              |       |       |       |        |       |  |                 |       |       |       |        |       |               |       |       |        |        |       |                |       |       |       |        |       |                   |       |       |        |       |       |                   |       |       |       |        |       |                   |              |              |              |               |              |               |              |              |              |              |              |              |       |       |       |       |       |              |       |       |       |       |       |                |       |       |       |       |       |          |       |       |       |       |       |               |       |       |       |       |       |                      |       |       |        |       |       |             |       |       |        |       |       |              |              |              |              |              |              |
| Kazmierski, 2014b                  | 2.778                                                                                                                                                                                                                                                                                                                                                                                                                                                                                                                                                                                                                                                                                                                                                                                                                                                                                                                                                                                                                                                                                                                                                                                                                                                                                                                                                                                                                                                                                                                                                                                                                                                                                                                                                                                                                                                                                                                                                                                                                                                                                                                                                                                               | 0.497        | 15.517                    | 1.164         | 0.244        |                       |  |                       |            |             |             |         |         |              |       |       |       |        |       |  |                 |       |       |       |        |       |               |       |       |        |        |       |                |       |       |       |        |       |                   |       |       |        |       |       |                   |       |       |       |        |       |                   |              |              |              |               |              |               |              |              |              |              |              |              |       |       |       |       |       |              |       |       |       |       |       |                |       |       |       |       |       |          |       |       |       |       |       |               |       |       |       |       |       |                      |       |       |        |       |       |             |       |       |        |       |       |              |              |              |              |              |              |
| Mardani, 2012                      | 4.519                                                                                                                                                                                                                                                                                                                                                                                                                                                                                                                                                                                                                                                                                                                                                                                                                                                                                                                                                                                                                                                                                                                                                                                                                                                                                                                                                                                                                                                                                                                                                                                                                                                                                                                                                                                                                                                                                                                                                                                                                                                                                                                                                                                               | 1.041        | 19.614                    | 2.014         | 0.044        |                       |  |                       |            |             |             |         |         |              |       |       |       |        |       |  |                 |       |       |       |        |       |               |       |       |        |        |       |                |       |       |       |        |       |                   |       |       |        |       |       |                   |       |       |       |        |       |                   |              |              |              |               |              |               |              |              |              |              |              |              |       |       |       |       |       |              |       |       |       |       |       |                |       |       |       |       |       |          |       |       |       |       |       |               |       |       |       |       |       |                      |       |       |        |       |       |             |       |       |        |       |       |              |              |              |              |              |              |
| Martin, 2010                       | 1.883                                                                                                                                                                                                                                                                                                                                                                                                                                                                                                                                                                                                                                                                                                                                                                                                                                                                                                                                                                                                                                                                                                                                                                                                                                                                                                                                                                                                                                                                                                                                                                                                                                                                                                                                                                                                                                                                                                                                                                                                                                                                                                                                                                                               | 1.522        | 2.330                     | 5.824         | 0.000        |                       |  |                       |            |             |             |         |         |              |       |       |       |        |       |  |                 |       |       |       |        |       |               |       |       |        |        |       |                |       |       |       |        |       |                   |       |       |        |       |       |                   |       |       |       |        |       |                   |              |              |              |               |              |               |              |              |              |              |              |              |       |       |       |       |       |              |       |       |       |       |       |                |       |       |       |       |       |          |       |       |       |       |       |               |       |       |       |       |       |                      |       |       |        |       |       |             |       |       |        |       |       |              |              |              |              |              |              |
| Martin, 2012                       | 2.070                                                                                                                                                                                                                                                                                                                                                                                                                                                                                                                                                                                                                                                                                                                                                                                                                                                                                                                                                                                                                                                                                                                                                                                                                                                                                                                                                                                                                                                                                                                                                                                                                                                                                                                                                                                                                                                                                                                                                                                                                                                                                                                                                                                               | 1.575        | 2.720                     | 5.218         | 0.000        |                       |  |                       |            |             |             |         |         |              |       |       |       |        |       |  |                 |       |       |       |        |       |               |       |       |        |        |       |                |       |       |       |        |       |                   |       |       |        |       |       |                   |       |       |       |        |       |                   |              |              |              |               |              |               |              |              |              |              |              |              |       |       |       |       |       |              |       |       |       |       |       |                |       |       |       |       |       |          |       |       |       |       |       |               |       |       |       |       |       |                      |       |       |        |       |       |             |       |       |        |       |       |              |              |              |              |              |              |
| Miyazaki, 2011                     | 2.728                                                                                                                                                                                                                                                                                                                                                                                                                                                                                                                                                                                                                                                                                                                                                                                                                                                                                                                                                                                                                                                                                                                                                                                                                                                                                                                                                                                                                                                                                                                                                                                                                                                                                                                                                                                                                                                                                                                                                                                                                                                                                                                                                                                               | 1.283        | 5.799                     | 2.608         | 0.009        |                       |  |                       |            |             |             |         |         |              |       |       |       |        |       |  |                 |       |       |       |        |       |               |       |       |        |        |       |                |       |       |       |        |       |                   |       |       |        |       |       |                   |       |       |       |        |       |                   |              |              |              |               |              |               |              |              |              |              |              |              |       |       |       |       |       |              |       |       |       |       |       |                |       |       |       |       |       |          |       |       |       |       |       |               |       |       |       |       |       |                      |       |       |        |       |       |             |       |       |        |       |       |              |              |              |              |              |              |
| Mu, 2010                           | 1.271                                                                                                                                                                                                                                                                                                                                                                                                                                                                                                                                                                                                                                                                                                                                                                                                                                                                                                                                                                                                                                                                                                                                                                                                                                                                                                                                                                                                                                                                                                                                                                                                                                                                                                                                                                                                                                                                                                                                                                                                                                                                                                                                                                                               | 0.703        | 2.299                     | 0.794         | 0.427        |                       |  |                       |            |             |             |         |         |              |       |       |       |        |       |  |                 |       |       |       |        |       |               |       |       |        |        |       |                |       |       |       |        |       |                   |       |       |        |       |       |                   |       |       |       |        |       |                   |              |              |              |               |              |               |              |              |              |              |              |              |       |       |       |       |       |              |       |       |       |       |       |                |       |       |       |       |       |          |       |       |       |       |       |               |       |       |       |       |       |                      |       |       |        |       |       |             |       |       |        |       |       |              |              |              |              |              |              |
| Nikolic, 2012                      | 1.933                                                                                                                                                                                                                                                                                                                                                                                                                                                                                                                                                                                                                                                                                                                                                                                                                                                                                                                                                                                                                                                                                                                                                                                                                                                                                                                                                                                                                                                                                                                                                                                                                                                                                                                                                                                                                                                                                                                                                                                                                                                                                                                                                                                               | 0.946        | 3.951                     | 1.808         | 0.071        |                       |  |                       |            |             |             |         |         |              |       |       |       |        |       |  |                 |       |       |       |        |       |               |       |       |        |        |       |                |       |       |       |        |       |                   |       |       |        |       |       |                   |       |       |       |        |       |                   |              |              |              |               |              |               |              |              |              |              |              |              |       |       |       |       |       |              |       |       |       |       |       |                |       |       |       |       |       |          |       |       |       |       |       |               |       |       |       |       |       |                      |       |       |        |       |       |             |       |       |        |       |       |              |              |              |              |              |              |
| Santana Santos, 2004               | 3.454                                                                                                                                                                                                                                                                                                                                                                                                                                                                                                                                                                                                                                                                                                                                                                                                                                                                                                                                                                                                                                                                                                                                                                                                                                                                                                                                                                                                                                                                                                                                                                                                                                                                                                                                                                                                                                                                                                                                                                                                                                                                                                                                                                                               | 0.802        | 14.872                    | 1.664         | 0.096        |                       |  |                       |            |             |             |         |         |              |       |       |       |        |       |  |                 |       |       |       |        |       |               |       |       |        |        |       |                |       |       |       |        |       |                   |       |       |        |       |       |                   |       |       |       |        |       |                   |              |              |              |               |              |               |              |              |              |              |              |              |       |       |       |       |       |              |       |       |       |       |       |                |       |       |       |       |       |          |       |       |       |       |       |               |       |       |       |       |       |                      |       |       |        |       |       |             |       |       |        |       |       |              |              |              |              |              |              |
| Zhang, 2015                        | 5.103                                                                                                                                                                                                                                                                                                                                                                                                                                                                                                                                                                                                                                                                                                                                                                                                                                                                                                                                                                                                                                                                                                                                                                                                                                                                                                                                                                                                                                                                                                                                                                                                                                                                                                                                                                                                                                                                                                                                                                                                                                                                                                                                                                                               | 2.535        | 10.269                    | 4.567         | 0.000        |                       |  |                       |            |             |             |         |         |              |       |       |       |        |       |  |                 |       |       |       |        |       |               |       |       |        |        |       |                |       |       |       |        |       |                   |       |       |        |       |       |                   |       |       |       |        |       |                   |              |              |              |               |              |               |              |              |              |              |              |              |       |       |       |       |       |              |       |       |       |       |       |                |       |       |       |       |       |          |       |       |       |       |       |               |       |       |       |       |       |                      |       |       |        |       |       |             |       |       |        |       |       |              |              |              |              |              |              |
| <b>Total</b>                       | <b>2.068</b>                                                                                                                                                                                                                                                                                                                                                                                                                                                                                                                                                                                                                                                                                                                                                                                                                                                                                                                                                                                                                                                                                                                                                                                                                                                                                                                                                                                                                                                                                                                                                                                                                                                                                                                                                                                                                                                                                                                                                                                                                                                                                                                                                                                        | <b>1.700</b> | <b>2.514</b>              | <b>7.277</b>  | <b>0.000</b> |                       |  |                       |            |             |             |         |         |              |       |       |       |        |       |  |                 |       |       |       |        |       |               |       |       |        |        |       |                |       |       |       |        |       |                   |       |       |        |       |       |                   |       |       |       |        |       |                   |              |              |              |               |              |               |              |              |              |              |              |              |       |       |       |       |       |              |       |       |       |       |       |                |       |       |       |       |       |          |       |       |       |       |       |               |       |       |       |       |       |                      |       |       |        |       |       |             |       |       |        |       |       |              |              |              |              |              |              |
| BMI >28 (including >30)            | <table border="1"> <thead> <tr> <th rowspan="2">Study name</th> <th colspan="5">Statistics for each study</th> <th rowspan="2">Odds ratio and 95% CI</th> </tr> <tr> <th>Odds ratio</th> <th>Lower limit</th> <th>Upper limit</th> <th>Z-Value</th> <th>p-Value</th> </tr> </thead> <tbody> <tr> <td>Caldas, 2019</td> <td>1.316</td> <td>0.299</td> <td>5.788</td> <td>0.364</td> <td>0.716</td> <td rowspan="7"> </td> </tr> <tr> <td>Chen, 2017</td> <td>1.397</td> <td>0.575</td> <td>3.394</td> <td>0.738</td> <td>0.460</td> </tr> <tr> <td>Martin, 2010</td> <td>0.703</td> <td>0.557</td> <td>0.888</td> <td>-2.958</td> <td>0.003</td> </tr> <tr> <td>Norkeine, 2007</td> <td>1.244</td> <td>0.655</td> <td>2.364</td> <td>0.667</td> <td>0.505</td> </tr> <tr> <td>Royse, 2011</td> <td>2.800</td> <td>1.161</td> <td>6.752</td> <td>2.293</td> <td>0.022</td> </tr> <tr> <td>Rudolph, 2005</td> <td>1.750</td> <td>0.449</td> <td>6.825</td> <td>0.806</td> <td>0.420</td> </tr> <tr> <td>Zhang, 2015</td> <td>0.695</td> <td>0.266</td> <td>1.815</td> <td>-0.743</td> <td>0.457</td> </tr> <tr> <td><b>Total</b></td> <td><b>1.158</b></td> <td><b>0.744</b></td> <td><b>1.802</b></td> <td><b>0.649</b></td> <td><b>0.516</b></td> </tr> </tbody> </table>                                                                                                                                                                                                                                                                                                                                                                                                                                                                                                                                                                                                                                                                                                                                                                                                                                                                                                                            | Study name   | Statistics for each study |               |              |                       |  | Odds ratio and 95% CI | Odds ratio | Lower limit | Upper limit | Z-Value | p-Value | Caldas, 2019 | 1.316 | 0.299 | 5.788 | 0.364  | 0.716 |  | Chen, 2017      | 1.397 | 0.575 | 3.394 | 0.738  | 0.460 | Martin, 2010  | 0.703 | 0.557 | 0.888  | -2.958 | 0.003 | Norkeine, 2007 | 1.244 | 0.655 | 2.364 | 0.667  | 0.505 | Royse, 2011       | 2.800 | 1.161 | 6.752  | 2.293 | 0.022 | Rudolph, 2005     | 1.750 | 0.449 | 6.825 | 0.806  | 0.420 | Zhang, 2015       | 0.695        | 0.266        | 1.815        | -0.743        | 0.457        | <b>Total</b>  | <b>1.158</b> | <b>0.744</b> | <b>1.802</b> | <b>0.649</b> | <b>0.516</b> |              |       |       |       |       |       |              |       |       |       |       |       |                |       |       |       |       |       |          |       |       |       |       |       |               |       |       |       |       |       |                      |       |       |        |       |       |             |       |       |        |       |       |              |              |              |              |              |              |
| Study name                         | Statistics for each study                                                                                                                                                                                                                                                                                                                                                                                                                                                                                                                                                                                                                                                                                                                                                                                                                                                                                                                                                                                                                                                                                                                                                                                                                                                                                                                                                                                                                                                                                                                                                                                                                                                                                                                                                                                                                                                                                                                                                                                                                                                                                                                                                                           |              |                           |               |              | Odds ratio and 95% CI |  |                       |            |             |             |         |         |              |       |       |       |        |       |  |                 |       |       |       |        |       |               |       |       |        |        |       |                |       |       |       |        |       |                   |       |       |        |       |       |                   |       |       |       |        |       |                   |              |              |              |               |              |               |              |              |              |              |              |              |       |       |       |       |       |              |       |       |       |       |       |                |       |       |       |       |       |          |       |       |       |       |       |               |       |       |       |       |       |                      |       |       |        |       |       |             |       |       |        |       |       |              |              |              |              |              |              |
|                                    | Odds ratio                                                                                                                                                                                                                                                                                                                                                                                                                                                                                                                                                                                                                                                                                                                                                                                                                                                                                                                                                                                                                                                                                                                                                                                                                                                                                                                                                                                                                                                                                                                                                                                                                                                                                                                                                                                                                                                                                                                                                                                                                                                                                                                                                                                          | Lower limit  | Upper limit               | Z-Value       | p-Value      |                       |  |                       |            |             |             |         |         |              |       |       |       |        |       |  |                 |       |       |       |        |       |               |       |       |        |        |       |                |       |       |       |        |       |                   |       |       |        |       |       |                   |       |       |       |        |       |                   |              |              |              |               |              |               |              |              |              |              |              |              |       |       |       |       |       |              |       |       |       |       |       |                |       |       |       |       |       |          |       |       |       |       |       |               |       |       |       |       |       |                      |       |       |        |       |       |             |       |       |        |       |       |              |              |              |              |              |              |
| Caldas, 2019                       | 1.316                                                                                                                                                                                                                                                                                                                                                                                                                                                                                                                                                                                                                                                                                                                                                                                                                                                                                                                                                                                                                                                                                                                                                                                                                                                                                                                                                                                                                                                                                                                                                                                                                                                                                                                                                                                                                                                                                                                                                                                                                                                                                                                                                                                               | 0.299        | 5.788                     | 0.364         | 0.716        |                       |  |                       |            |             |             |         |         |              |       |       |       |        |       |  |                 |       |       |       |        |       |               |       |       |        |        |       |                |       |       |       |        |       |                   |       |       |        |       |       |                   |       |       |       |        |       |                   |              |              |              |               |              |               |              |              |              |              |              |              |       |       |       |       |       |              |       |       |       |       |       |                |       |       |       |       |       |          |       |       |       |       |       |               |       |       |       |       |       |                      |       |       |        |       |       |             |       |       |        |       |       |              |              |              |              |              |              |
| Chen, 2017                         | 1.397                                                                                                                                                                                                                                                                                                                                                                                                                                                                                                                                                                                                                                                                                                                                                                                                                                                                                                                                                                                                                                                                                                                                                                                                                                                                                                                                                                                                                                                                                                                                                                                                                                                                                                                                                                                                                                                                                                                                                                                                                                                                                                                                                                                               | 0.575        | 3.394                     | 0.738         | 0.460        |                       |  |                       |            |             |             |         |         |              |       |       |       |        |       |  |                 |       |       |       |        |       |               |       |       |        |        |       |                |       |       |       |        |       |                   |       |       |        |       |       |                   |       |       |       |        |       |                   |              |              |              |               |              |               |              |              |              |              |              |              |       |       |       |       |       |              |       |       |       |       |       |                |       |       |       |       |       |          |       |       |       |       |       |               |       |       |       |       |       |                      |       |       |        |       |       |             |       |       |        |       |       |              |              |              |              |              |              |
| Martin, 2010                       | 0.703                                                                                                                                                                                                                                                                                                                                                                                                                                                                                                                                                                                                                                                                                                                                                                                                                                                                                                                                                                                                                                                                                                                                                                                                                                                                                                                                                                                                                                                                                                                                                                                                                                                                                                                                                                                                                                                                                                                                                                                                                                                                                                                                                                                               | 0.557        | 0.888                     | -2.958        | 0.003        |                       |  |                       |            |             |             |         |         |              |       |       |       |        |       |  |                 |       |       |       |        |       |               |       |       |        |        |       |                |       |       |       |        |       |                   |       |       |        |       |       |                   |       |       |       |        |       |                   |              |              |              |               |              |               |              |              |              |              |              |              |       |       |       |       |       |              |       |       |       |       |       |                |       |       |       |       |       |          |       |       |       |       |       |               |       |       |       |       |       |                      |       |       |        |       |       |             |       |       |        |       |       |              |              |              |              |              |              |
| Norkeine, 2007                     | 1.244                                                                                                                                                                                                                                                                                                                                                                                                                                                                                                                                                                                                                                                                                                                                                                                                                                                                                                                                                                                                                                                                                                                                                                                                                                                                                                                                                                                                                                                                                                                                                                                                                                                                                                                                                                                                                                                                                                                                                                                                                                                                                                                                                                                               | 0.655        | 2.364                     | 0.667         | 0.505        |                       |  |                       |            |             |             |         |         |              |       |       |       |        |       |  |                 |       |       |       |        |       |               |       |       |        |        |       |                |       |       |       |        |       |                   |       |       |        |       |       |                   |       |       |       |        |       |                   |              |              |              |               |              |               |              |              |              |              |              |              |       |       |       |       |       |              |       |       |       |       |       |                |       |       |       |       |       |          |       |       |       |       |       |               |       |       |       |       |       |                      |       |       |        |       |       |             |       |       |        |       |       |              |              |              |              |              |              |
| Royse, 2011                        | 2.800                                                                                                                                                                                                                                                                                                                                                                                                                                                                                                                                                                                                                                                                                                                                                                                                                                                                                                                                                                                                                                                                                                                                                                                                                                                                                                                                                                                                                                                                                                                                                                                                                                                                                                                                                                                                                                                                                                                                                                                                                                                                                                                                                                                               | 1.161        | 6.752                     | 2.293         | 0.022        |                       |  |                       |            |             |             |         |         |              |       |       |       |        |       |  |                 |       |       |       |        |       |               |       |       |        |        |       |                |       |       |       |        |       |                   |       |       |        |       |       |                   |       |       |       |        |       |                   |              |              |              |               |              |               |              |              |              |              |              |              |       |       |       |       |       |              |       |       |       |       |       |                |       |       |       |       |       |          |       |       |       |       |       |               |       |       |       |       |       |                      |       |       |        |       |       |             |       |       |        |       |       |              |              |              |              |              |              |
| Rudolph, 2005                      | 1.750                                                                                                                                                                                                                                                                                                                                                                                                                                                                                                                                                                                                                                                                                                                                                                                                                                                                                                                                                                                                                                                                                                                                                                                                                                                                                                                                                                                                                                                                                                                                                                                                                                                                                                                                                                                                                                                                                                                                                                                                                                                                                                                                                                                               | 0.449        | 6.825                     | 0.806         | 0.420        |                       |  |                       |            |             |             |         |         |              |       |       |       |        |       |  |                 |       |       |       |        |       |               |       |       |        |        |       |                |       |       |       |        |       |                   |       |       |        |       |       |                   |       |       |       |        |       |                   |              |              |              |               |              |               |              |              |              |              |              |              |       |       |       |       |       |              |       |       |       |       |       |                |       |       |       |       |       |          |       |       |       |       |       |               |       |       |       |       |       |                      |       |       |        |       |       |             |       |       |        |       |       |              |              |              |              |              |              |
| Zhang, 2015                        | 0.695                                                                                                                                                                                                                                                                                                                                                                                                                                                                                                                                                                                                                                                                                                                                                                                                                                                                                                                                                                                                                                                                                                                                                                                                                                                                                                                                                                                                                                                                                                                                                                                                                                                                                                                                                                                                                                                                                                                                                                                                                                                                                                                                                                                               | 0.266        | 1.815                     | -0.743        | 0.457        |                       |  |                       |            |             |             |         |         |              |       |       |       |        |       |  |                 |       |       |       |        |       |               |       |       |        |        |       |                |       |       |       |        |       |                   |       |       |        |       |       |                   |       |       |       |        |       |                   |              |              |              |               |              |               |              |              |              |              |              |              |       |       |       |       |       |              |       |       |       |       |       |                |       |       |       |       |       |          |       |       |       |       |       |               |       |       |       |       |       |                      |       |       |        |       |       |             |       |       |        |       |       |              |              |              |              |              |              |
| <b>Total</b>                       | <b>1.158</b>                                                                                                                                                                                                                                                                                                                                                                                                                                                                                                                                                                                                                                                                                                                                                                                                                                                                                                                                                                                                                                                                                                                                                                                                                                                                                                                                                                                                                                                                                                                                                                                                                                                                                                                                                                                                                                                                                                                                                                                                                                                                                                                                                                                        | <b>0.744</b> | <b>1.802</b>              | <b>0.649</b>  | <b>0.516</b> |                       |  |                       |            |             |             |         |         |              |       |       |       |        |       |  |                 |       |       |       |        |       |               |       |       |        |        |       |                |       |       |       |        |       |                   |       |       |        |       |       |                   |       |       |       |        |       |                   |              |              |              |               |              |               |              |              |              |              |              |              |       |       |       |       |       |              |       |       |       |       |       |                |       |       |       |       |       |          |       |       |       |       |       |               |       |       |       |       |       |                      |       |       |        |       |       |             |       |       |        |       |       |              |              |              |              |              |              |

| BMI $\geq$ 30 only   | <u>Study name</u>    | <u>Statistics for each study</u> |             |             |             |         | <u>Odds ratio and 95% CI</u> |
|----------------------|----------------------|----------------------------------|-------------|-------------|-------------|---------|------------------------------|
|                      |                      | Odds ratio                       | Lower limit | Upper limit | Z-Value     | p-Value |                              |
|                      | Caldas, 2019         | 1.316                            | 0.299       | 5.788       | 0.364       | 0.716   |                              |
|                      | Chen, 2017           | 1.397                            | 0.575       | 3.394       | 0.738       | 0.460   |                              |
|                      | Norkeine, 2007       | 1.244                            | 0.655       | 2.364       | 0.667       | 0.505   |                              |
|                      | Royse, 2011          | 2.800                            | 1.161       | 6.752       | 2.293       | 0.022   |                              |
|                      | Rudolph, 2005        | 1.750                            | 0.449       | 6.825       | 0.806       | 0.420   |                              |
|                      |                      | 1.573                            | 1.045       | 2.368       | 2.172       | 0.030   |                              |
| Cognitive Impairment | <u>Study name</u>    | <u>Statistics for each study</u> |             |             |             |         | <u>Odds ratio and 95% CI</u> |
|                      |                      | Odds ratio                       | Lower limit | Upper limit | Z-Value     | p-Value |                              |
|                      | Leenders, 2018       | 4.081                            | 1.446       | 11.520      | 2.656       | 0.008   |                              |
|                      | Oldham, 2018         | 3.000                            | 1.123       | 8.013       | 2.192       | 0.028   |                              |
|                      | Kazmierski, 2014a    | 7.619                            | 2.927       | 19.832      | 4.160       | 0.000   |                              |
|                      | Oldham, 2015         | 6.111                            | 1.056       | 35.363      | 2.021       | 0.043   |                              |
|                      | Rudolph, 2005        | 4.000                            | 0.981       | 16.311      | 1.933       | 0.053   |                              |
|                      | Zhang, 2015          | 4.446                            | 1.676       | 11.797      | 2.997       | 0.003   |                              |
|                      | Rolfson, 1999b       | 2.311                            | 0.752       | 7.106       | 1.462       | 0.144   |                              |
|                      |                      | 4.170                            | 2.746       | 6.332       | 6.700       | 0.000   |                              |
| Depression           | <u>Study name</u>    | <u>Statistics for each study</u> |             |             |             |         | <u>Odds ratio and 95% CI</u> |
|                      |                      | Odds ratio                       | Lower limit | Z-Value     | Upper limit | p-Value |                              |
|                      | Oldham, 2018         | 3.984                            | 1.158       | 2.193       | 13.705      | 0.028   |                              |
|                      | Santana Santos, 2004 | 1.242                            | 0.553       | 0.525       | 2.787       | 0.600   |                              |
|                      | Tully, 2010          | 3.490                            | 1.477       | 2.850       | 8.245       | 0.004   |                              |
|                      | Rolfson, 1999a       | 4.846                            | 0.408       | 1.250       | 57.544      | 0.211   |                              |
|                      |                      | 2.493                            | 1.291       | 2.722       | 4.811       | 0.006   |                              |



Diabetes

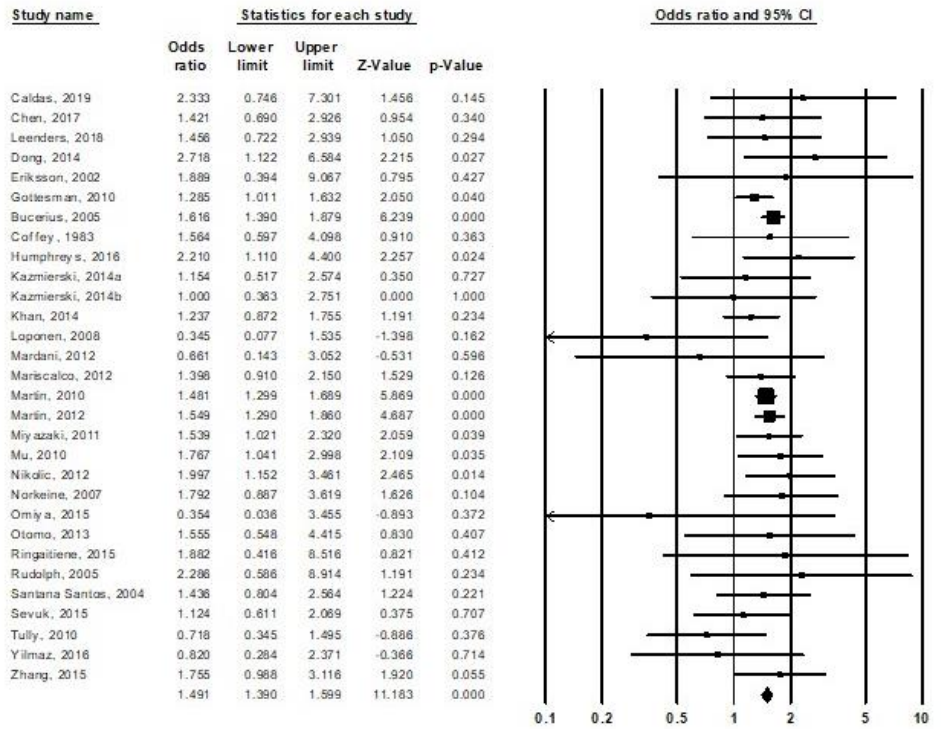

Dyslipidemia/Hyperlipidemia

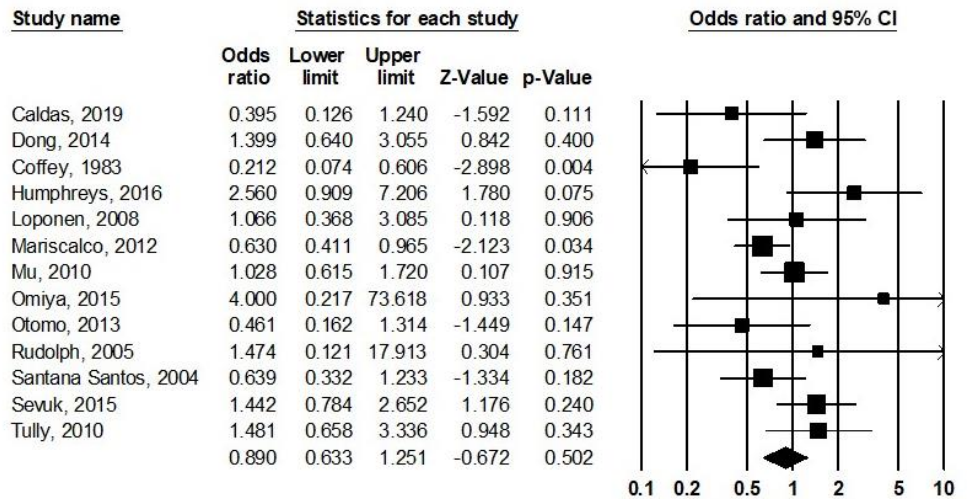

Education>12years/high school

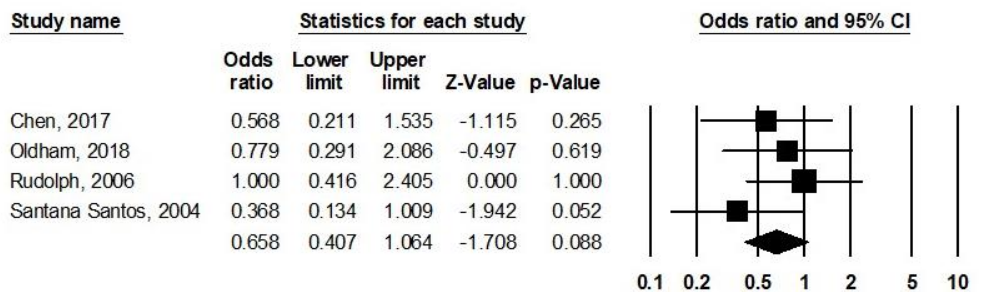

Hypertension

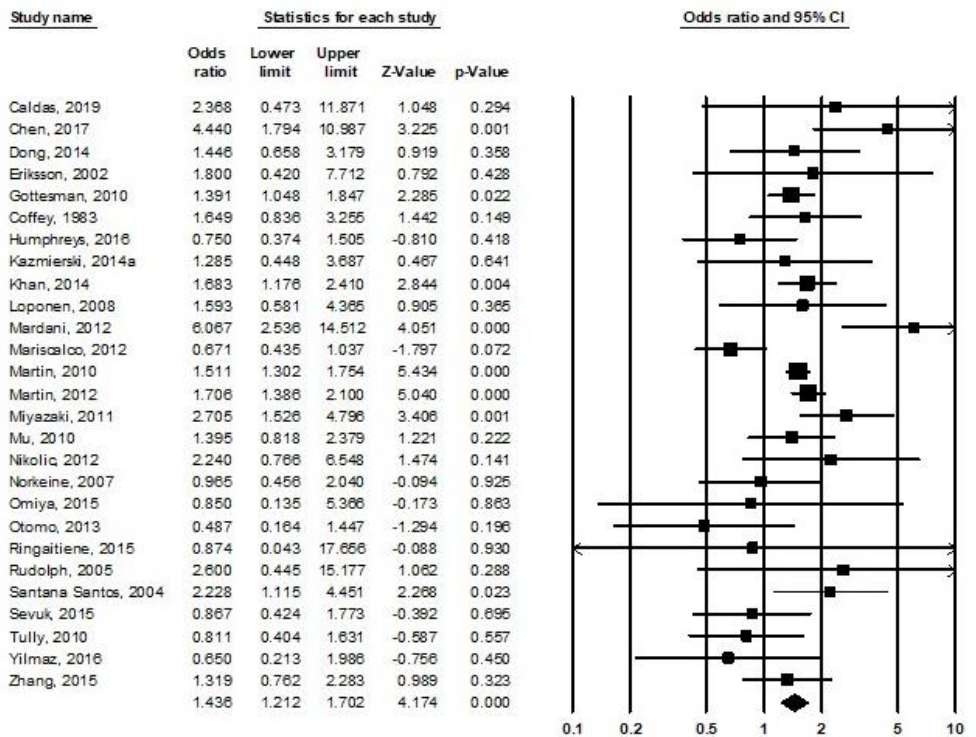

Sex (male)

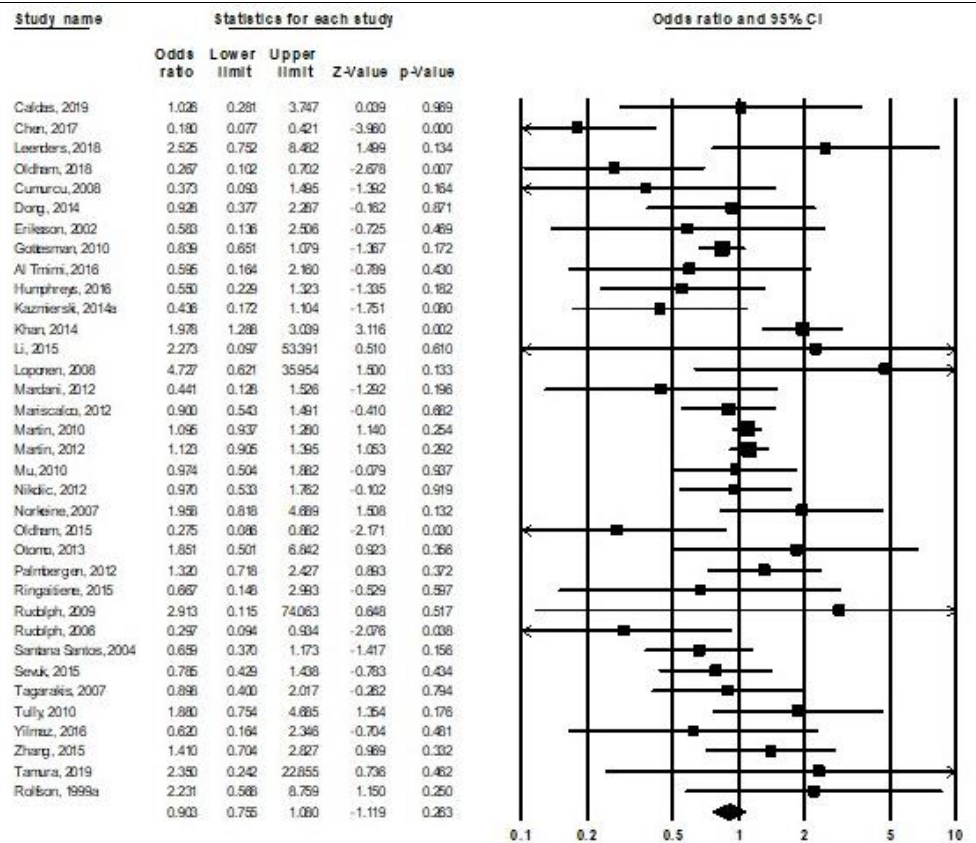

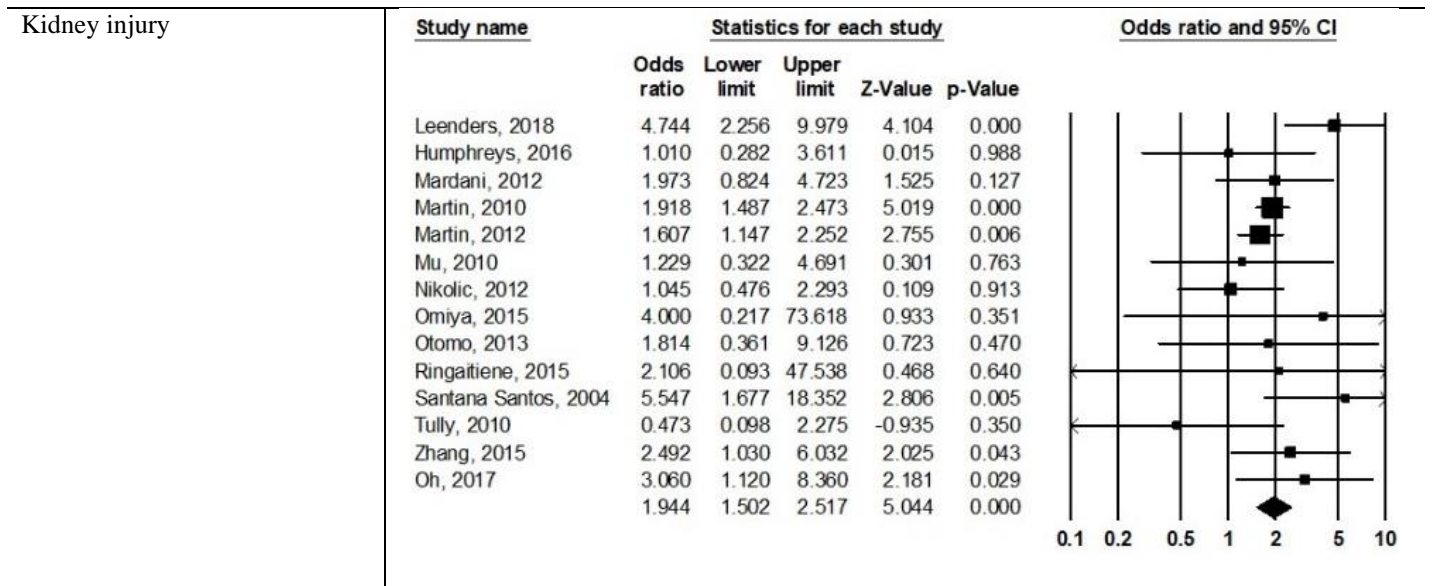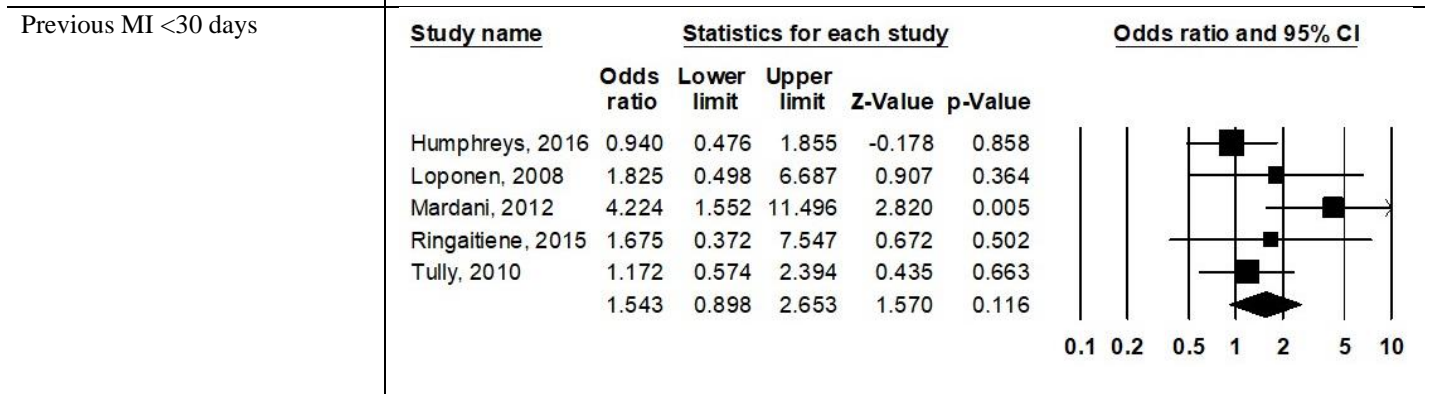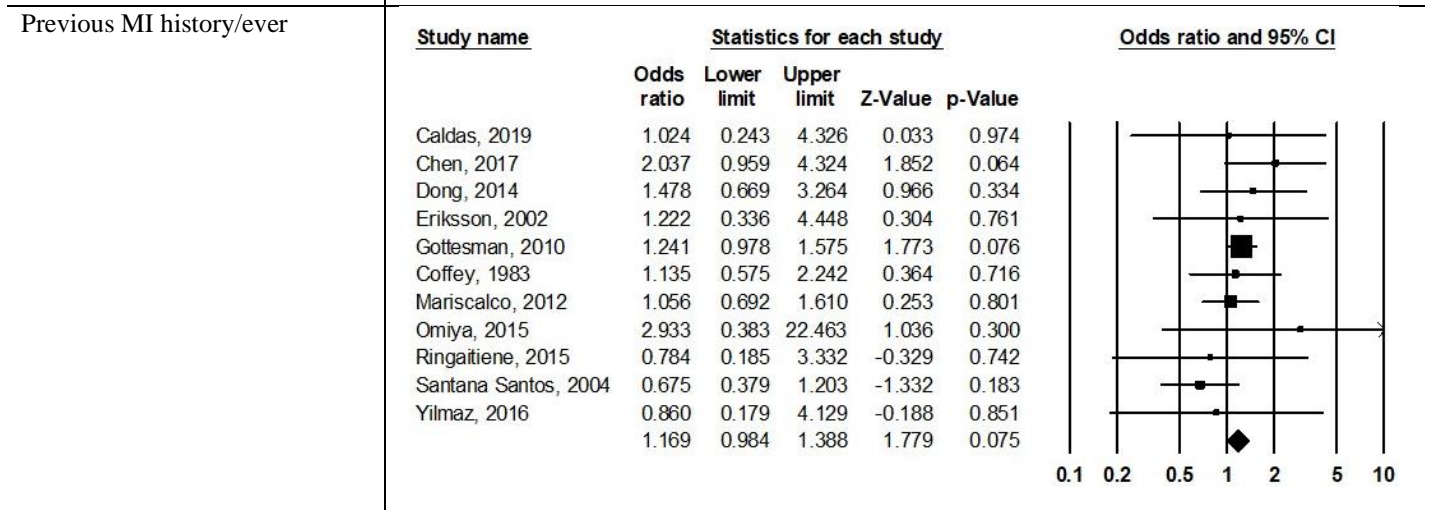



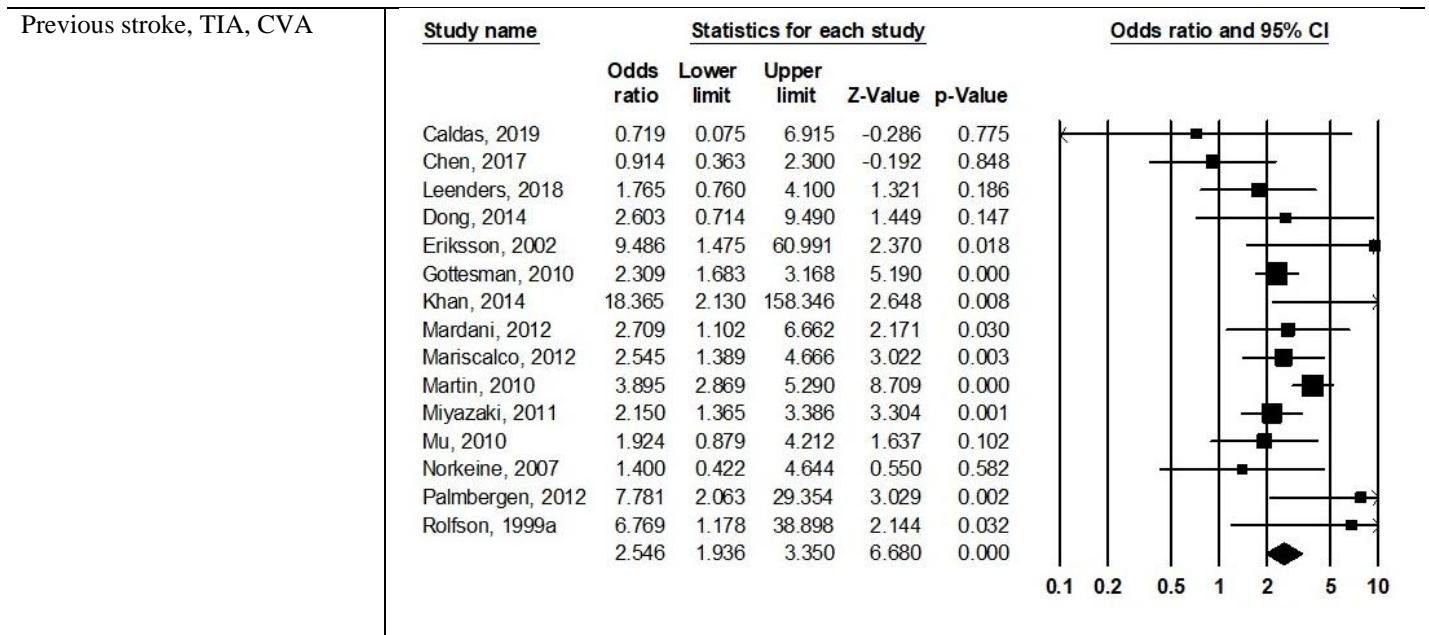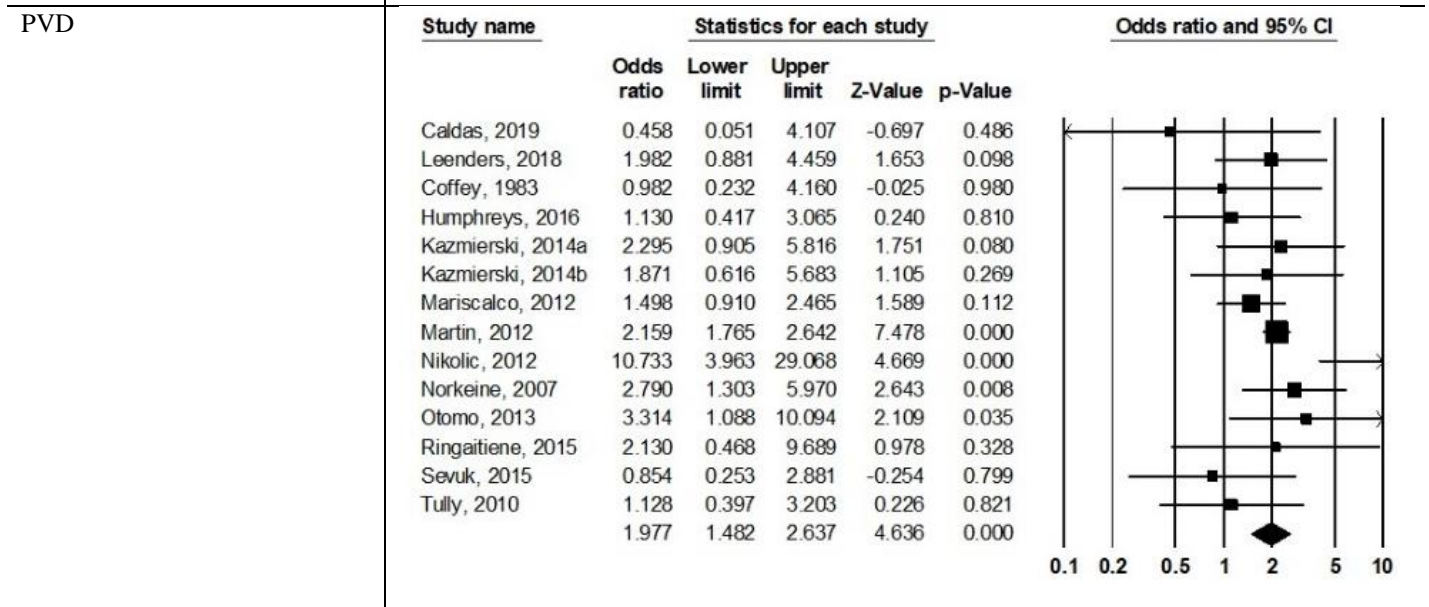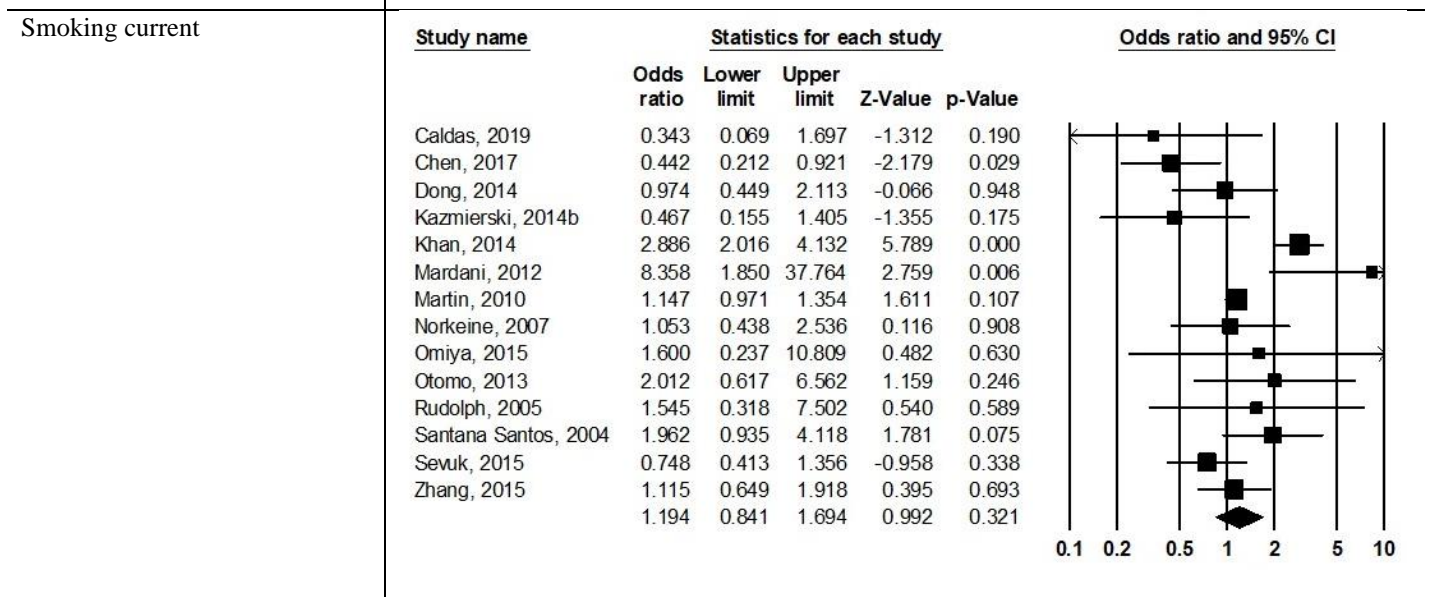

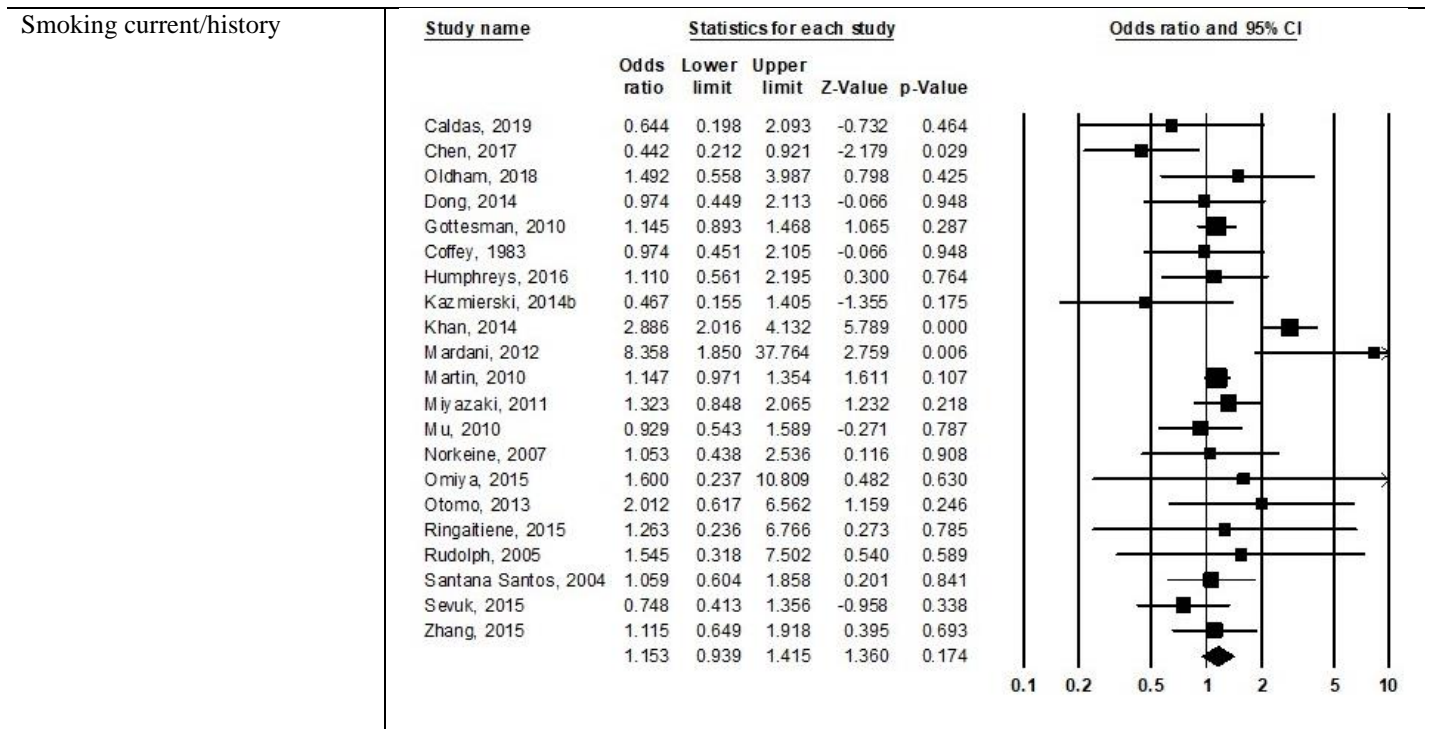

**Pre-Operative (Continuous)**

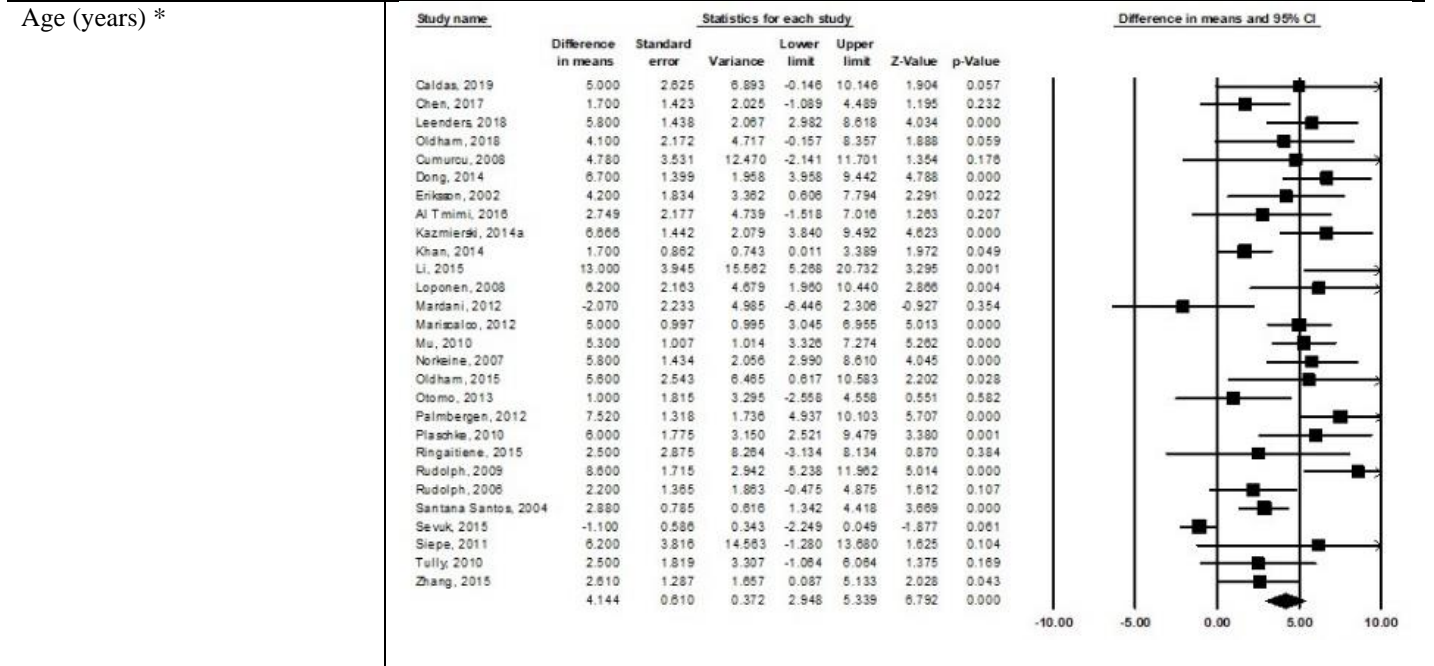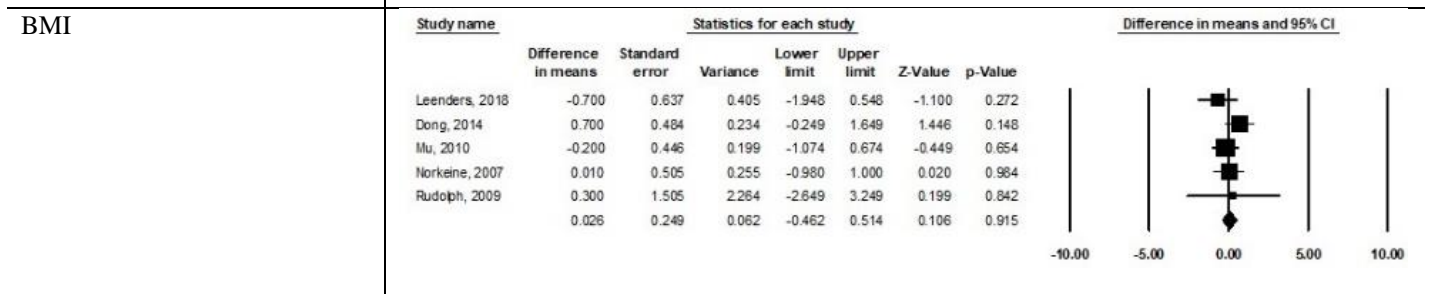

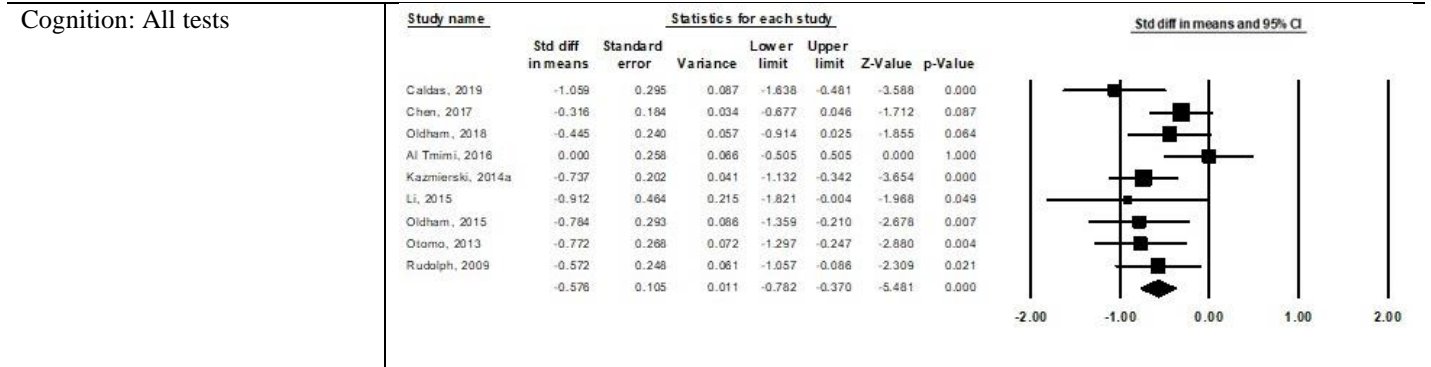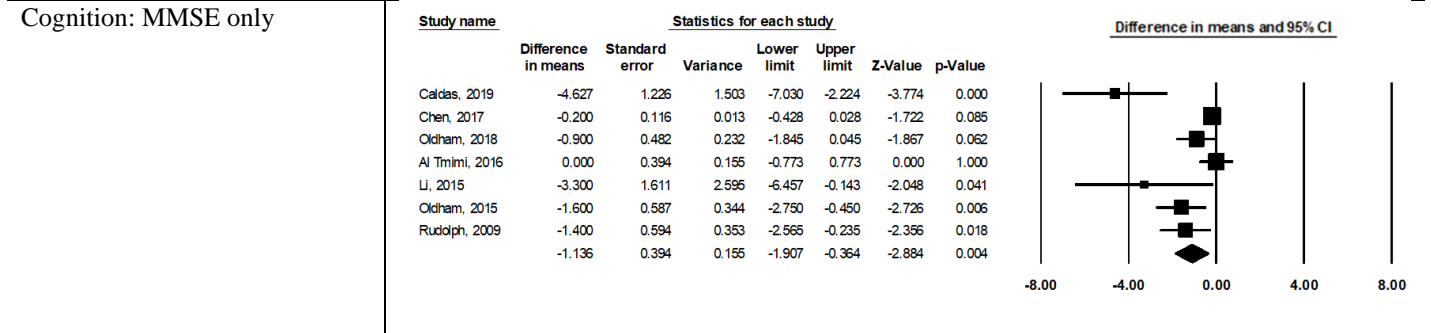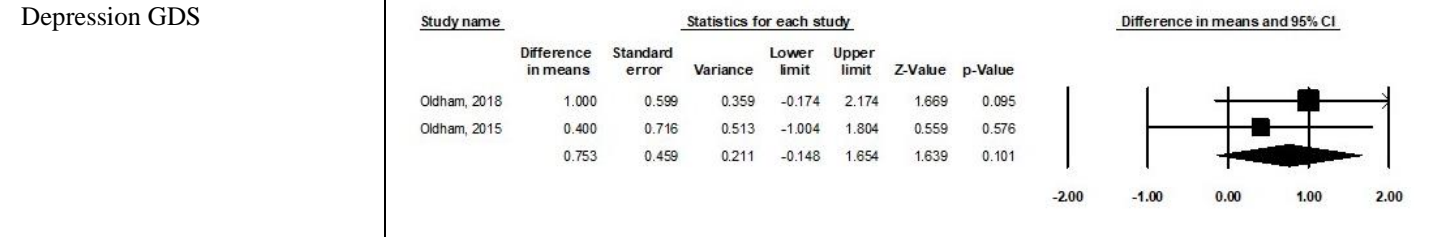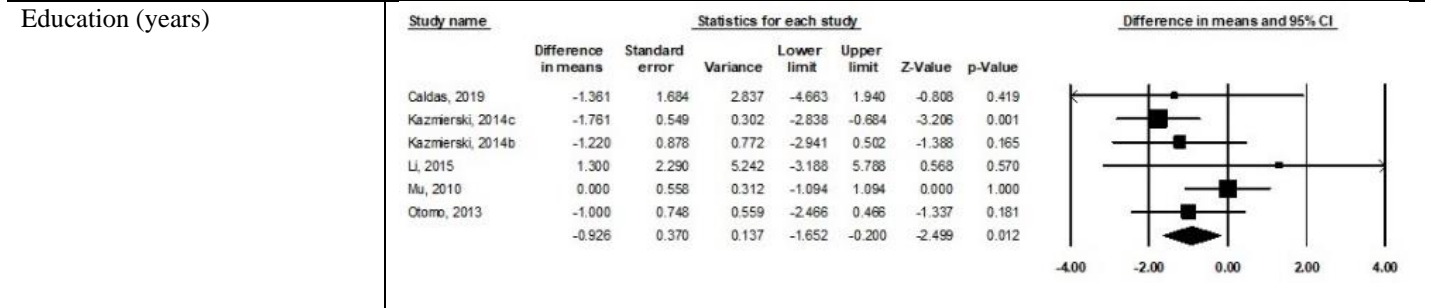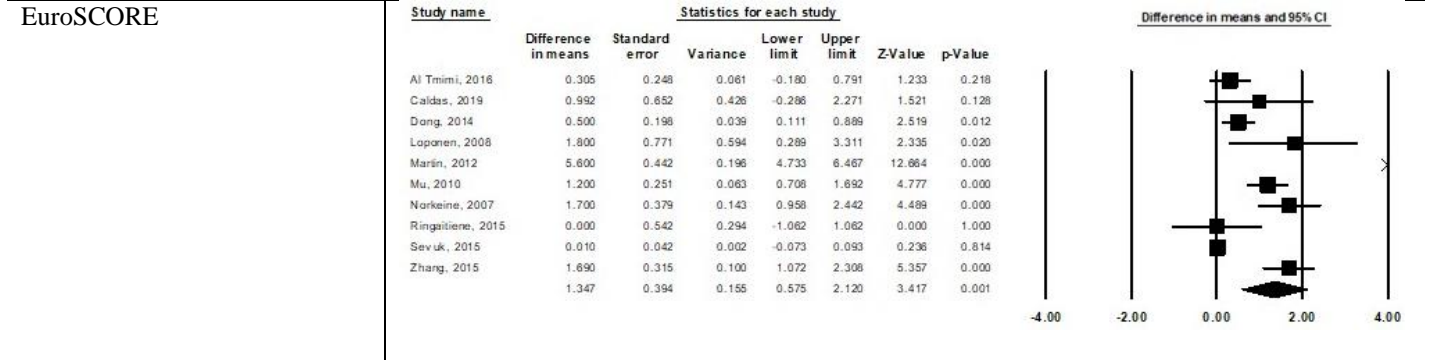



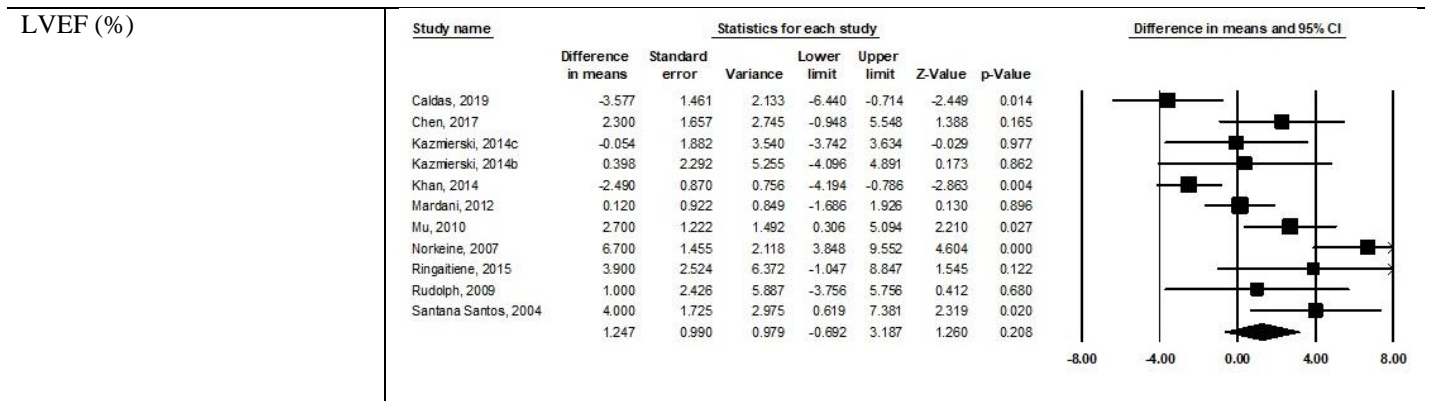

**Intra-Operative (Continuous)**

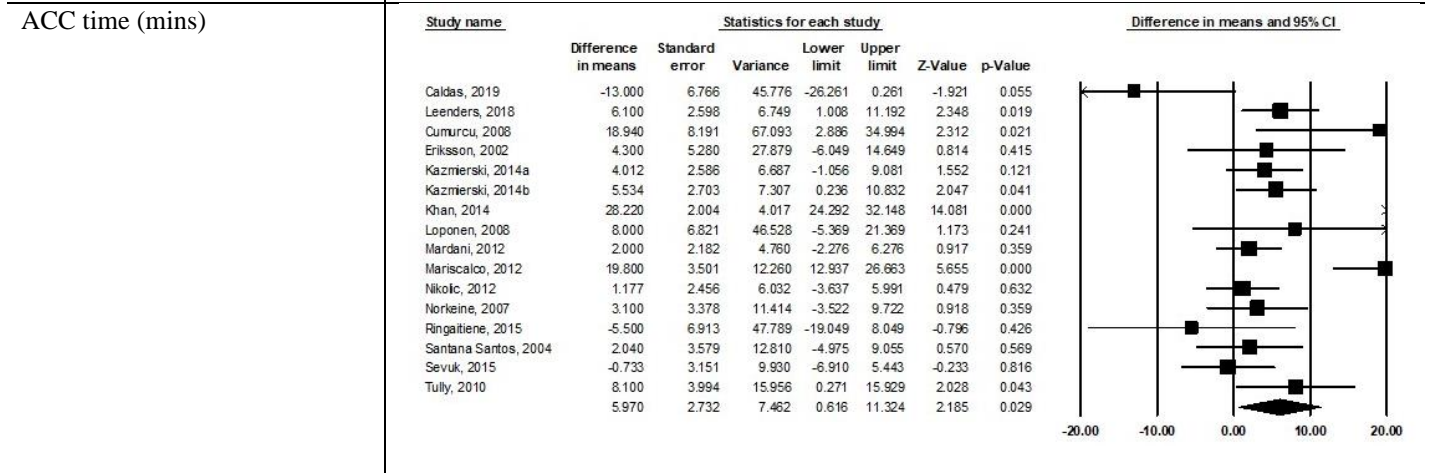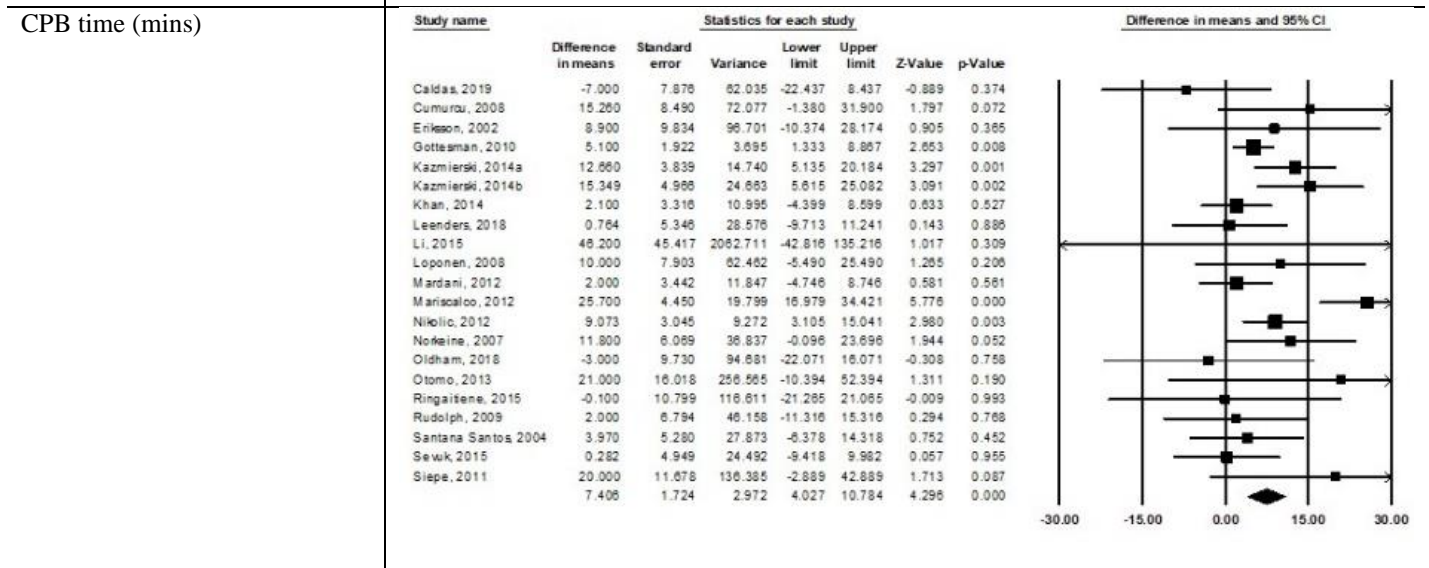

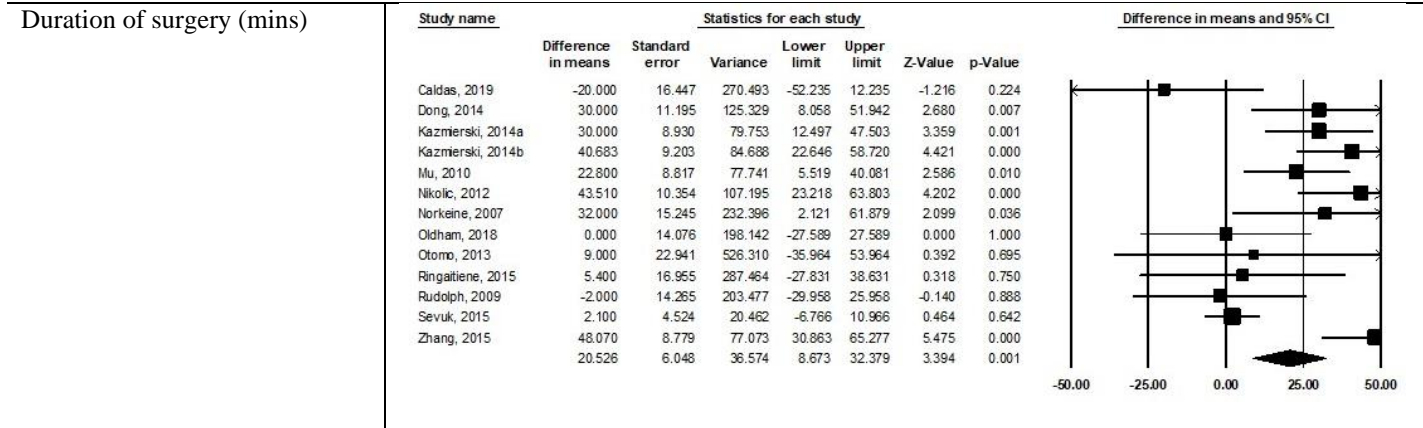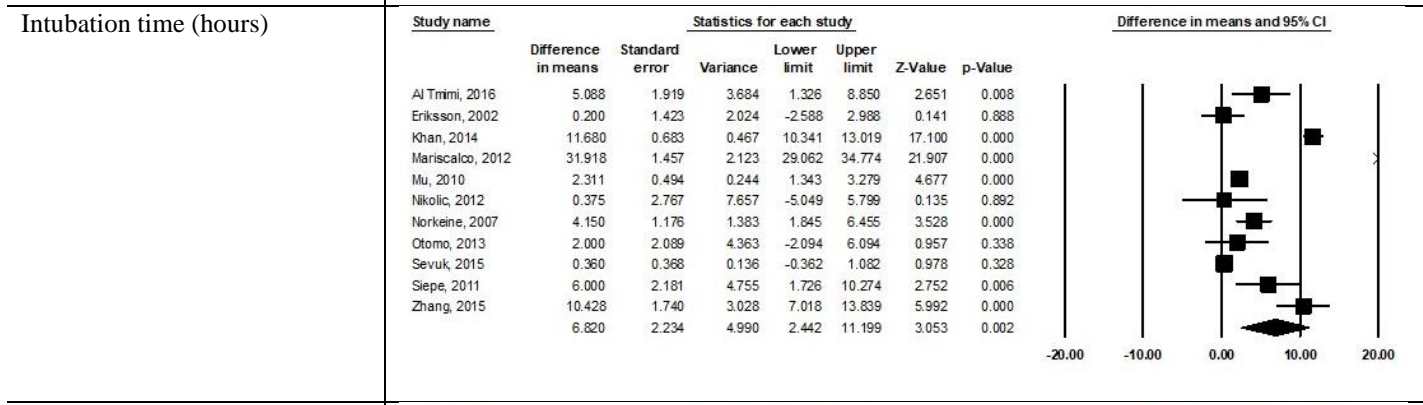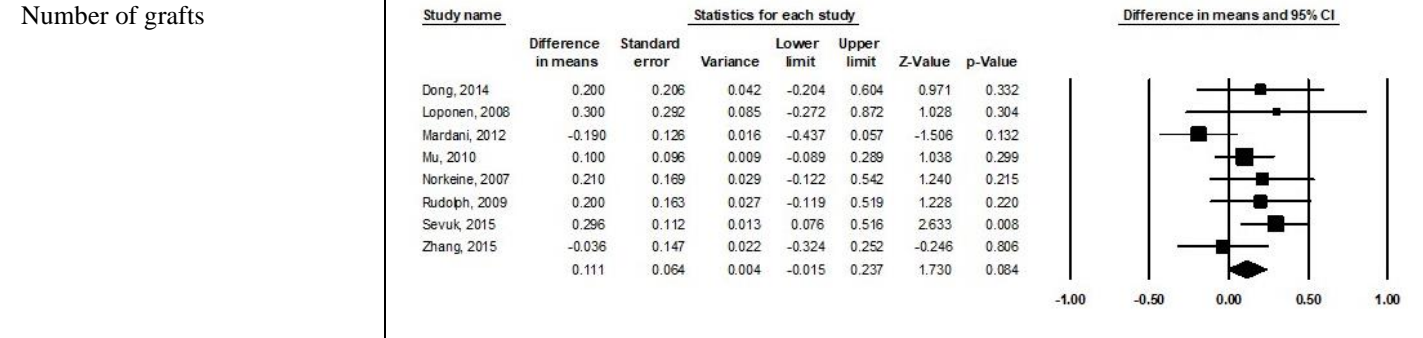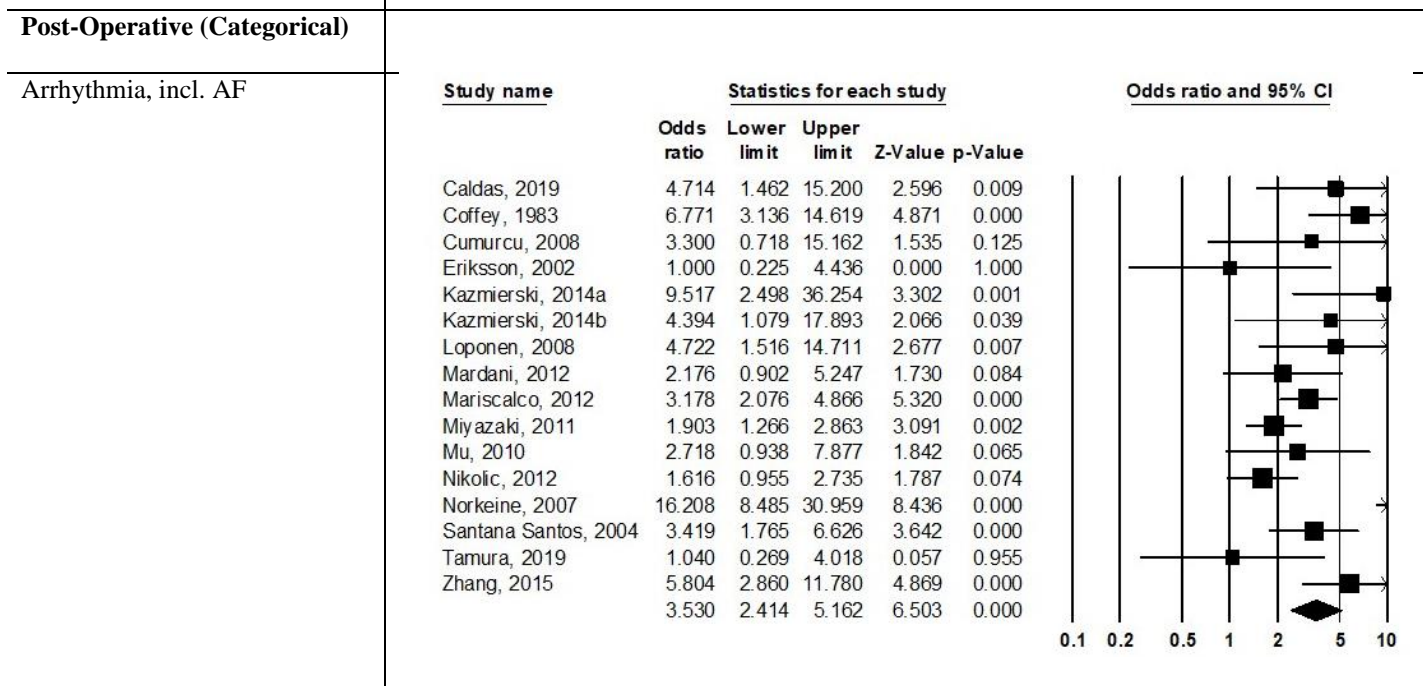



**Post-Operative (Continuous)**

LOS in ICU (days)

| Study name        | Statistics for each study |                |          |             |             |         |         | Difference in means and 95% CI |
|-------------------|---------------------------|----------------|----------|-------------|-------------|---------|---------|--------------------------------|
|                   | Difference in means       | Standard error | Variance | Lower limit | Upper limit | Z-Value | p-Value |                                |
| Al Tmimi, 2016    | 1.491                     | 0.339          | 0.115    | 0.826       | 2.155       | 4.396   | 0.000   |                                |
| Caldas, 2019      | 2.910                     | 1.833          | 3.361    | -0.683      | 6.503       | 1.587   | 0.112   |                                |
| Chen, 2017        | 2.253                     | 0.272          | 0.074    | 1.721       | 2.786       | 8.295   | 0.000   |                                |
| Eriksson, 2002    | -0.100                    | 0.209          | 0.044    | -0.509      | 0.309       | -0.479  | 0.632   |                                |
| Khan, 2014        | 6.510                     | 0.234          | 0.055    | 6.052       | 6.968       | 27.852  | 0.000   |                                |
| Mardani, 2012     | 0.530                     | 0.251          | 0.063    | 0.037       | 1.023       | 2.108   | 0.035   |                                |
| Mariscalco, 2012  | 2.188                     | 0.074          | 0.005    | 2.043       | 2.333       | 29.630  | 0.000   |                                |
| Mu, 2010          | 0.920                     | 0.197          | 0.039    | 0.533       | 1.306       | 4.666   | 0.000   |                                |
| Norkeine, 2007    | 4.800                     | 0.438          | 0.191    | 3.943       | 5.657       | 10.971  | 0.000   |                                |
| Omiya, 2015       | 1.385                     | 0.349          | 0.122    | 0.701       | 2.070       | 3.965   | 0.000   |                                |
| Palmbergen, 2012  | 2.990                     | 0.385          | 0.148    | 2.236       | 3.744       | 7.773   | 0.000   |                                |
| Siepe, 2011       | 1.500                     | 1.381          | 1.906    | -1.206      | 4.206       | 1.087   | 0.277   |                                |
| Subramaniam, 2019 | 1.412                     | 0.353          | 0.125    | 0.720       | 2.105       | 3.996   | 0.000   |                                |
| Zhang, 2015       | 2.500                     | 0.311          | 0.097    | 1.890       | 3.110       | 8.035   | 0.000   |                                |
|                   | 2.221                     | 0.462          | 0.213    | 1.316       | 3.126       | 4.812   | 0.000   |                                |

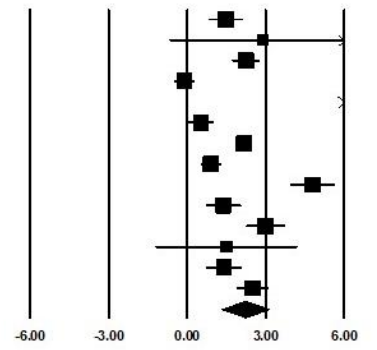

**Figure S2. Funnel plots for statistically significant analyses in regard to delirium post-CABG, and results of publication bias/small-study effect investigation when more than 10 studies were available.**

|                                   | Egger's Test |                       | Trim and Fill          |                                         |        |
|-----------------------------------|--------------|-----------------------|------------------------|-----------------------------------------|--------|
|                                   | Intercept    | p value<br>(1-tailed) | No. imputed<br>studies | OR/MD <sup>†</sup><br>/SMD <sup>‡</sup> | 95% CI |
| <b>Preoperative (Categorical)</b> |              |                       |                        |                                         |        |
| Arrhythmia, incl. AF              |              |                       |                        |                                         |        |
|                                   |              |                       |                        |                                         |        |
| BMI $\geq 30$ only                |              |                       |                        |                                         |        |
|                                   |              |                       |                        |                                         |        |
|                                   |              |                       |                        |                                         |        |

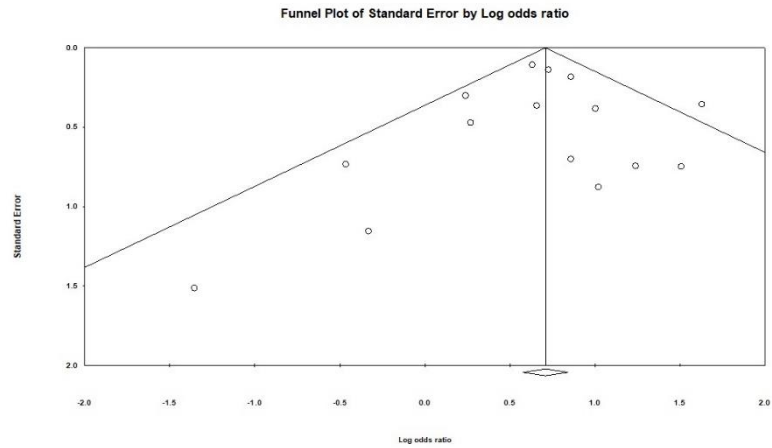

-0.08      .432

-      -      -

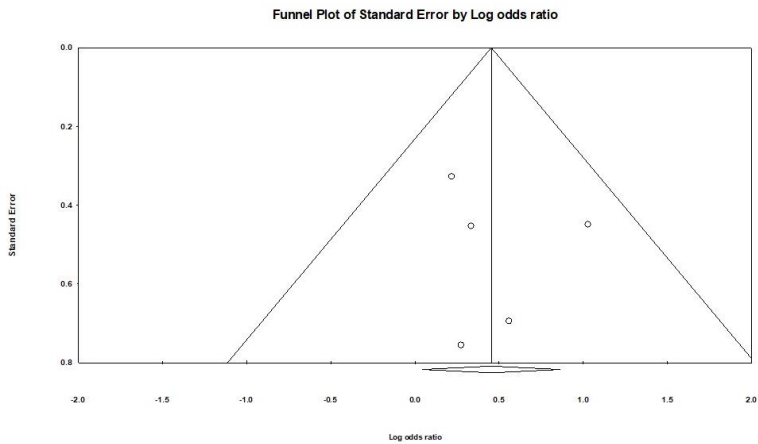

-      -      -      -      -

Cognitive Impairment

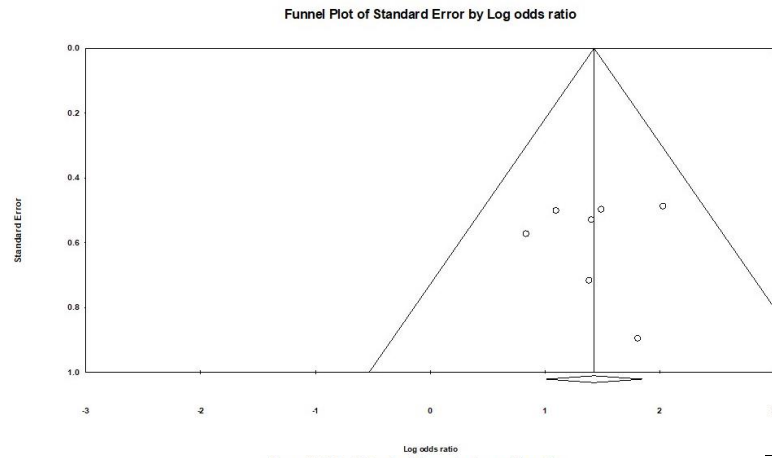

Depression

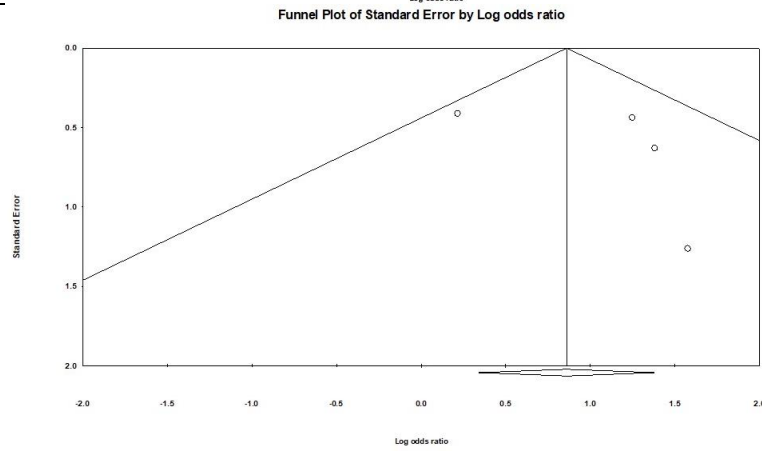

Diabetes

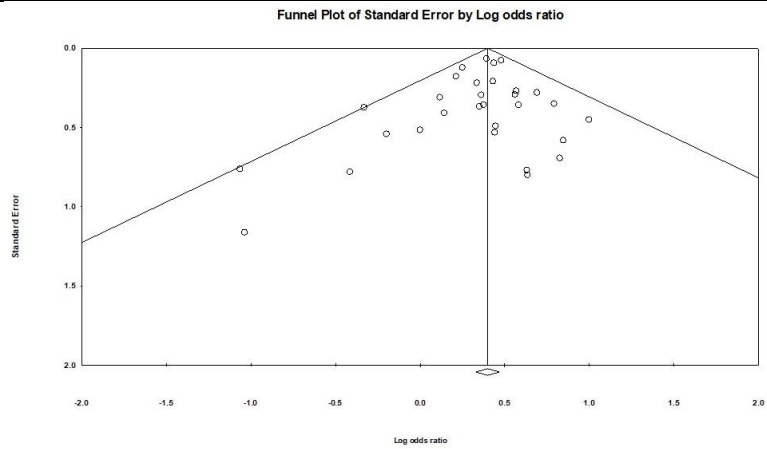

-0.27

.143

-

-

-

Hypertension

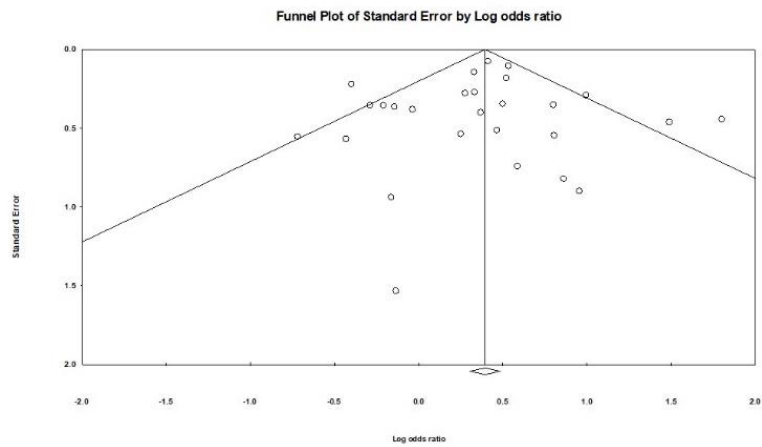

-0.18

.347

-

-

-

Kidney Injury

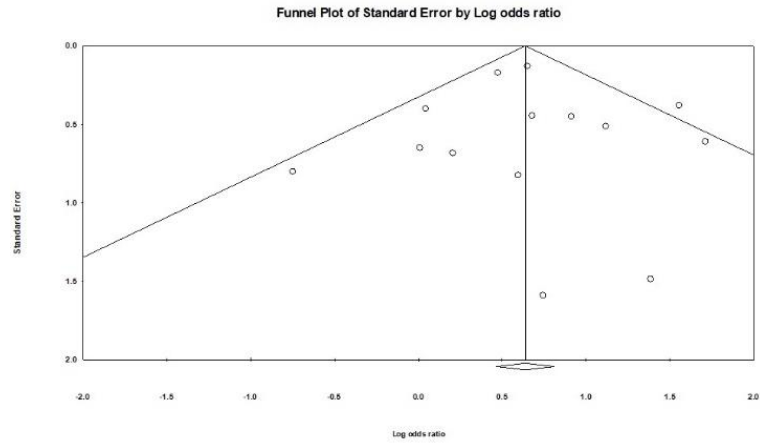

0.13

.406

-

-

-

Previous stroke, TIA, CVA

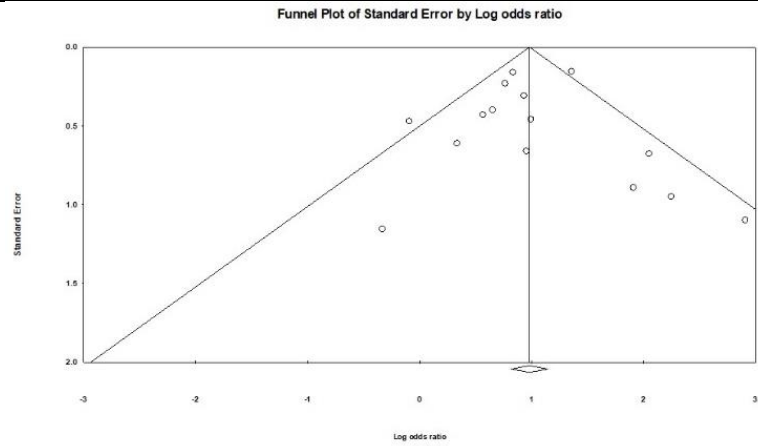

-0.03

.483

-

-

-

PVD

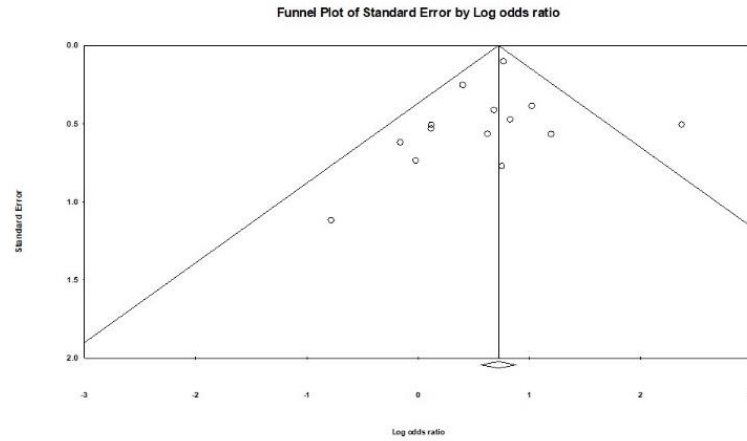

-0.35

.266

-

-

-

Preoperative (Continuous)

Age

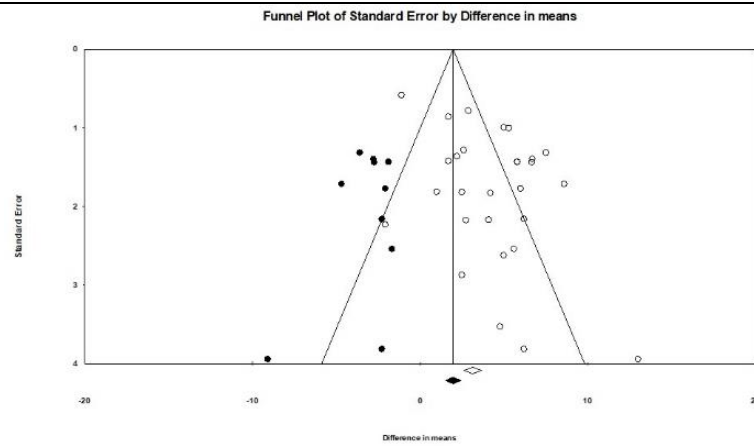

2.44

.003

11

2.24†

1.04-3.45

Cognition: All tests

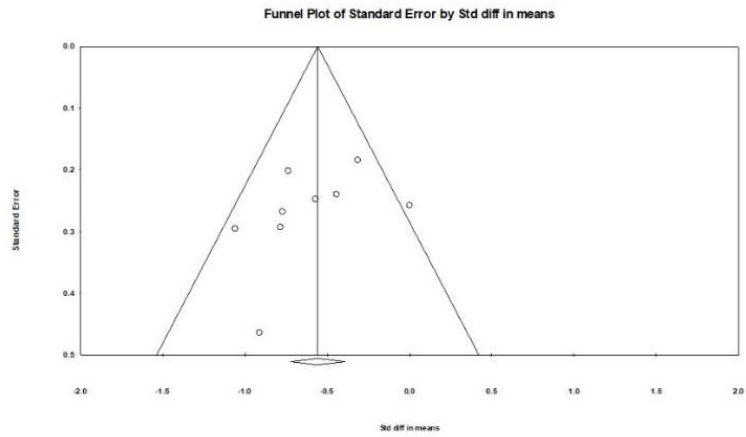

Cognition: MMSE only

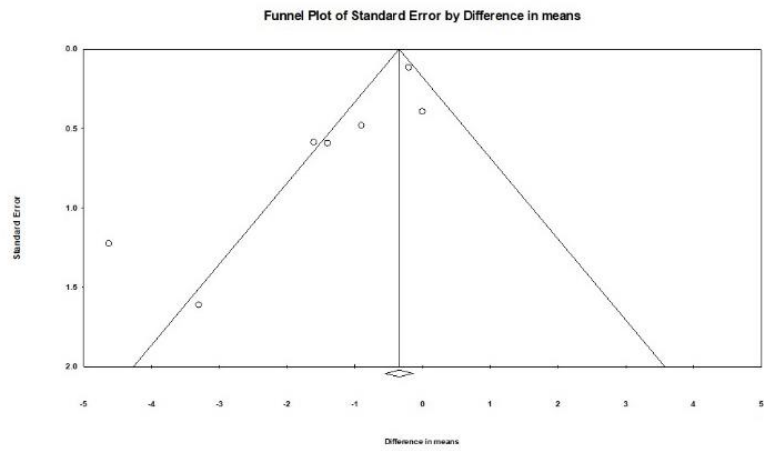

Education (years)

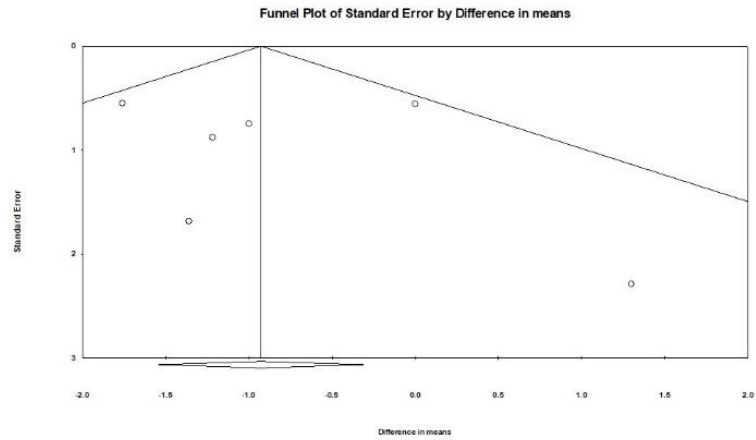

EuroSCORE

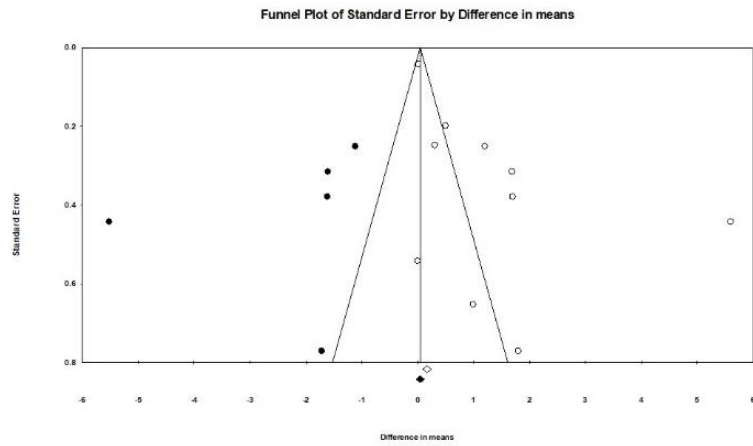

Intra-Operative (Continuous)

|      |      |   |       |            |  |
|------|------|---|-------|------------|--|
|      |      |   |       |            |  |
|      |      |   |       |            |  |
| 4.36 | .010 | 5 | 0.15† | -0.60-0.90 |  |
|      |      |   |       |            |  |



ACC time (mins)

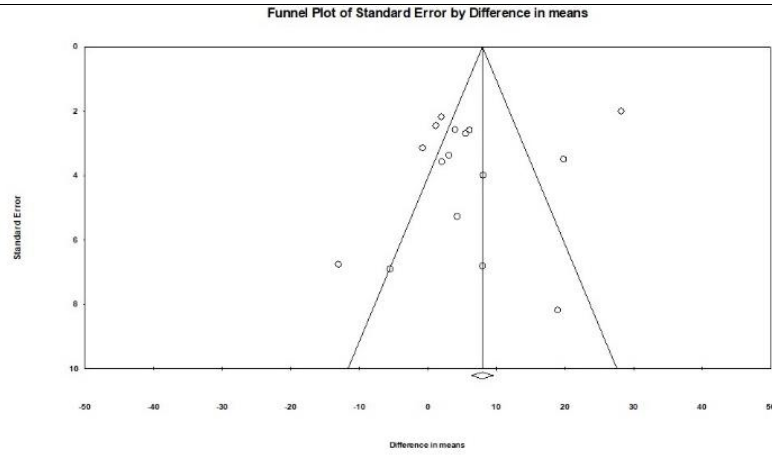

-2.45

.143

-

-

-

CPB time (mins)

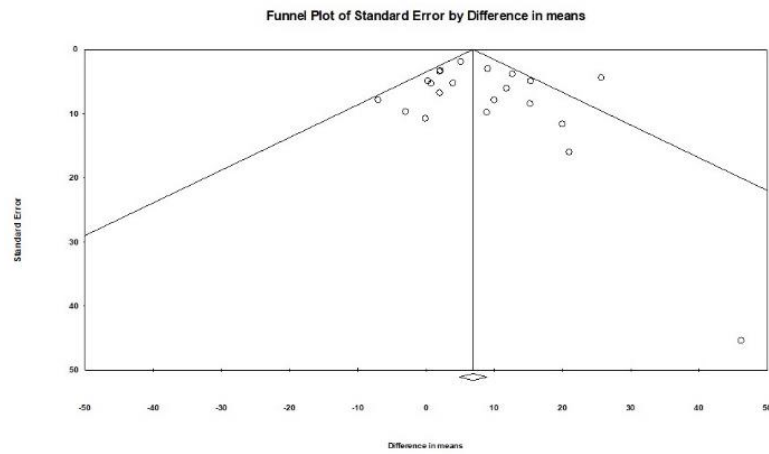

0.45

.241

-

-

-

Duration of surgery (mins)

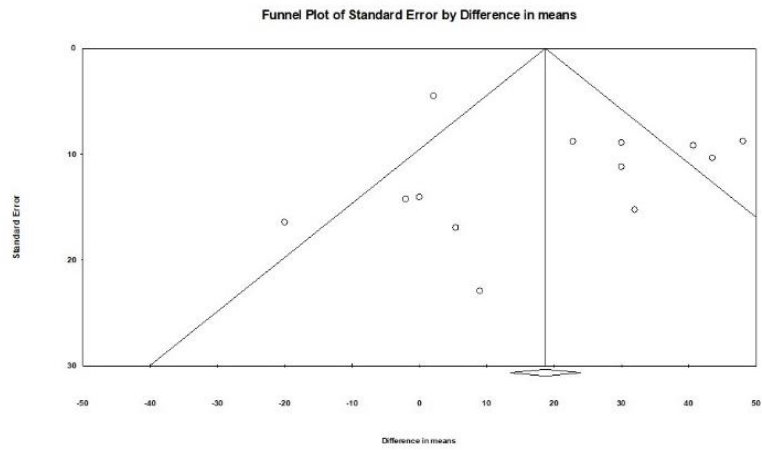

0.77

.296

-

-

-

Intubation time (hours)

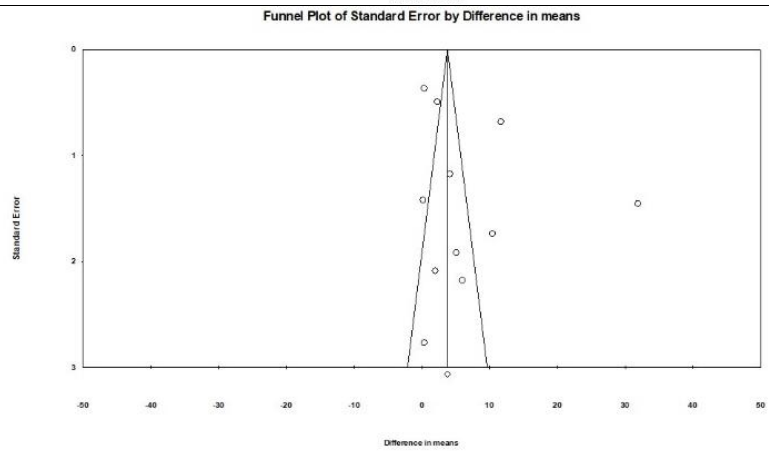

5.20

.106

-

-

-

Post-Operative (Categorical)

Arrhythmia, incl. AF

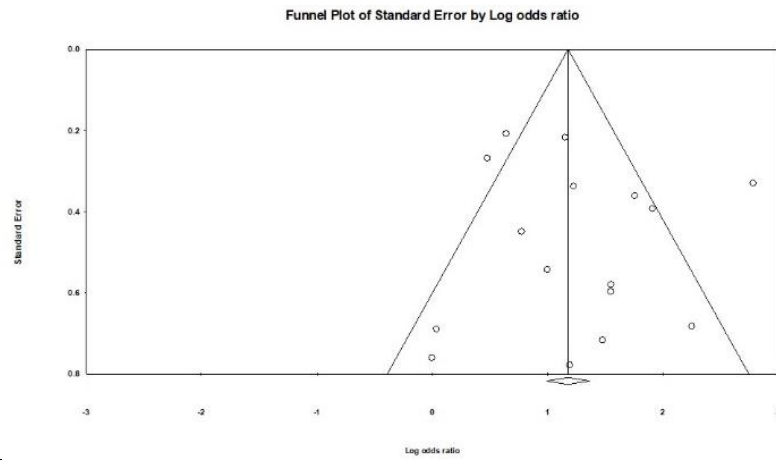

0.76

.260

-

-

Post-Operative (Continuous)

LOS in ICU (days)

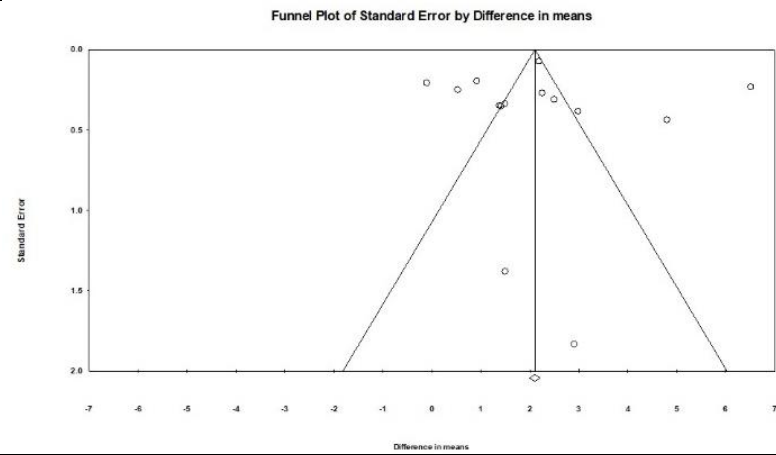

0.32

.459

-

-

-

**Figure S3. Forest plots for acute cognitive decline post-CABG analyses.**

| Variable                           | Forest Plot                                                                                                                                                                                                                                                                                                                                                                                                                                                                                                                                                                                                                                                                                                                                                                                                                                                                                                                                                                                                                                                                                                                                                                                                                                                                         |                    |                                  |                |                |                              |  |                              |  |                   |                    |                    |                |                |  |              |        |       |        |        |       |  |              |       |       |       |       |       |               |       |       |        |        |       |                  |       |       |       |       |       |                |       |       |        |        |       |              |       |       |       |        |       |                  |       |       |       |       |       |  |       |       |       |       |       |
|------------------------------------|-------------------------------------------------------------------------------------------------------------------------------------------------------------------------------------------------------------------------------------------------------------------------------------------------------------------------------------------------------------------------------------------------------------------------------------------------------------------------------------------------------------------------------------------------------------------------------------------------------------------------------------------------------------------------------------------------------------------------------------------------------------------------------------------------------------------------------------------------------------------------------------------------------------------------------------------------------------------------------------------------------------------------------------------------------------------------------------------------------------------------------------------------------------------------------------------------------------------------------------------------------------------------------------|--------------------|----------------------------------|----------------|----------------|------------------------------|--|------------------------------|--|-------------------|--------------------|--------------------|----------------|----------------|--|--------------|--------|-------|--------|--------|-------|--|--------------|-------|-------|-------|-------|-------|---------------|-------|-------|--------|--------|-------|------------------|-------|-------|-------|-------|-------|----------------|-------|-------|--------|--------|-------|--------------|-------|-------|-------|--------|-------|------------------|-------|-------|-------|-------|-------|--|-------|-------|-------|-------|-------|
| <b>Pre-Operative (Categorical)</b> |                                                                                                                                                                                                                                                                                                                                                                                                                                                                                                                                                                                                                                                                                                                                                                                                                                                                                                                                                                                                                                                                                                                                                                                                                                                                                     |                    |                                  |                |                |                              |  |                              |  |                   |                    |                    |                |                |  |              |        |       |        |        |       |  |              |       |       |       |       |       |               |       |       |        |        |       |                  |       |       |       |       |       |                |       |       |        |        |       |              |       |       |       |        |       |                  |       |       |       |       |       |  |       |       |       |       |       |
| Arrhythmia, incl. AF               | <table border="1"> <thead> <tr> <th><u>Study name</u></th> <th colspan="5"><u>Statistics for each study</u></th> <th><u>Odds ratio and 95% CI</u></th> </tr> <tr> <th></th> <th><b>Odds ratio</b></th> <th><b>Lower limit</b></th> <th><b>Upper limit</b></th> <th><b>Z-Value</b></th> <th><b>p-Value</b></th> <th></th> </tr> </thead> <tbody> <tr> <td>Colak, 2015</td> <td>11.000</td> <td>1.425</td> <td>84.927</td> <td>2.299</td> <td>0.021</td> <td rowspan="8"> </td> </tr> <tr> <td>Dong, 2014</td> <td>1.459</td> <td>0.561</td> <td>3.795</td> <td>0.774</td> <td>0.439</td> </tr> <tr> <td>Mu, 2013</td> <td>0.938</td> <td>0.397</td> <td>2.214</td> <td>-0.147</td> <td>0.883</td> </tr> <tr> <td>Norkiene, 2011</td> <td>1.170</td> <td>0.356</td> <td>3.843</td> <td>0.258</td> <td>0.796</td> </tr> <tr> <td>Restrepo, 2002</td> <td>0.905</td> <td>0.029</td> <td>27.858</td> <td>-0.057</td> <td>0.954</td> </tr> <tr> <td>Slater, 2009</td> <td>0.495</td> <td>0.056</td> <td>4.360</td> <td>-0.634</td> <td>0.526</td> </tr> <tr> <td>Suksompong, 2002</td> <td>1.090</td> <td>0.216</td> <td>5.504</td> <td>0.104</td> <td>0.917</td> </tr> <tr> <td></td> <td>1.243</td> <td>0.757</td> <td>2.041</td> <td>0.861</td> <td>0.389</td> </tr> </tbody> </table> | <u>Study name</u>  | <u>Statistics for each study</u> |                |                |                              |  | <u>Odds ratio and 95% CI</u> |  | <b>Odds ratio</b> | <b>Lower limit</b> | <b>Upper limit</b> | <b>Z-Value</b> | <b>p-Value</b> |  | Colak, 2015  | 11.000 | 1.425 | 84.927 | 2.299  | 0.021 |  | Dong, 2014   | 1.459 | 0.561 | 3.795 | 0.774 | 0.439 | Mu, 2013      | 0.938 | 0.397 | 2.214  | -0.147 | 0.883 | Norkiene, 2011   | 1.170 | 0.356 | 3.843 | 0.258 | 0.796 | Restrepo, 2002 | 0.905 | 0.029 | 27.858 | -0.057 | 0.954 | Slater, 2009 | 0.495 | 0.056 | 4.360 | -0.634 | 0.526 | Suksompong, 2002 | 1.090 | 0.216 | 5.504 | 0.104 | 0.917 |  | 1.243 | 0.757 | 2.041 | 0.861 | 0.389 |
| <u>Study name</u>                  | <u>Statistics for each study</u>                                                                                                                                                                                                                                                                                                                                                                                                                                                                                                                                                                                                                                                                                                                                                                                                                                                                                                                                                                                                                                                                                                                                                                                                                                                    |                    |                                  |                |                | <u>Odds ratio and 95% CI</u> |  |                              |  |                   |                    |                    |                |                |  |              |        |       |        |        |       |  |              |       |       |       |       |       |               |       |       |        |        |       |                  |       |       |       |       |       |                |       |       |        |        |       |              |       |       |       |        |       |                  |       |       |       |       |       |  |       |       |       |       |       |
|                                    | <b>Odds ratio</b>                                                                                                                                                                                                                                                                                                                                                                                                                                                                                                                                                                                                                                                                                                                                                                                                                                                                                                                                                                                                                                                                                                                                                                                                                                                                   | <b>Lower limit</b> | <b>Upper limit</b>               | <b>Z-Value</b> | <b>p-Value</b> |                              |  |                              |  |                   |                    |                    |                |                |  |              |        |       |        |        |       |  |              |       |       |       |       |       |               |       |       |        |        |       |                  |       |       |       |       |       |                |       |       |        |        |       |              |       |       |       |        |       |                  |       |       |       |       |       |  |       |       |       |       |       |
| Colak, 2015                        | 11.000                                                                                                                                                                                                                                                                                                                                                                                                                                                                                                                                                                                                                                                                                                                                                                                                                                                                                                                                                                                                                                                                                                                                                                                                                                                                              | 1.425              | 84.927                           | 2.299          | 0.021          |                              |  |                              |  |                   |                    |                    |                |                |  |              |        |       |        |        |       |  |              |       |       |       |       |       |               |       |       |        |        |       |                  |       |       |       |       |       |                |       |       |        |        |       |              |       |       |       |        |       |                  |       |       |       |       |       |  |       |       |       |       |       |
| Dong, 2014                         | 1.459                                                                                                                                                                                                                                                                                                                                                                                                                                                                                                                                                                                                                                                                                                                                                                                                                                                                                                                                                                                                                                                                                                                                                                                                                                                                               | 0.561              | 3.795                            | 0.774          | 0.439          |                              |  |                              |  |                   |                    |                    |                |                |  |              |        |       |        |        |       |  |              |       |       |       |       |       |               |       |       |        |        |       |                  |       |       |       |       |       |                |       |       |        |        |       |              |       |       |       |        |       |                  |       |       |       |       |       |  |       |       |       |       |       |
| Mu, 2013                           | 0.938                                                                                                                                                                                                                                                                                                                                                                                                                                                                                                                                                                                                                                                                                                                                                                                                                                                                                                                                                                                                                                                                                                                                                                                                                                                                               | 0.397              | 2.214                            | -0.147         | 0.883          |                              |  |                              |  |                   |                    |                    |                |                |  |              |        |       |        |        |       |  |              |       |       |       |       |       |               |       |       |        |        |       |                  |       |       |       |       |       |                |       |       |        |        |       |              |       |       |       |        |       |                  |       |       |       |       |       |  |       |       |       |       |       |
| Norkiene, 2011                     | 1.170                                                                                                                                                                                                                                                                                                                                                                                                                                                                                                                                                                                                                                                                                                                                                                                                                                                                                                                                                                                                                                                                                                                                                                                                                                                                               | 0.356              | 3.843                            | 0.258          | 0.796          |                              |  |                              |  |                   |                    |                    |                |                |  |              |        |       |        |        |       |  |              |       |       |       |       |       |               |       |       |        |        |       |                  |       |       |       |       |       |                |       |       |        |        |       |              |       |       |       |        |       |                  |       |       |       |       |       |  |       |       |       |       |       |
| Restrepo, 2002                     | 0.905                                                                                                                                                                                                                                                                                                                                                                                                                                                                                                                                                                                                                                                                                                                                                                                                                                                                                                                                                                                                                                                                                                                                                                                                                                                                               | 0.029              | 27.858                           | -0.057         | 0.954          |                              |  |                              |  |                   |                    |                    |                |                |  |              |        |       |        |        |       |  |              |       |       |       |       |       |               |       |       |        |        |       |                  |       |       |       |       |       |                |       |       |        |        |       |              |       |       |       |        |       |                  |       |       |       |       |       |  |       |       |       |       |       |
| Slater, 2009                       | 0.495                                                                                                                                                                                                                                                                                                                                                                                                                                                                                                                                                                                                                                                                                                                                                                                                                                                                                                                                                                                                                                                                                                                                                                                                                                                                               | 0.056              | 4.360                            | -0.634         | 0.526          |                              |  |                              |  |                   |                    |                    |                |                |  |              |        |       |        |        |       |  |              |       |       |       |       |       |               |       |       |        |        |       |                  |       |       |       |       |       |                |       |       |        |        |       |              |       |       |       |        |       |                  |       |       |       |       |       |  |       |       |       |       |       |
| Suksompong, 2002                   | 1.090                                                                                                                                                                                                                                                                                                                                                                                                                                                                                                                                                                                                                                                                                                                                                                                                                                                                                                                                                                                                                                                                                                                                                                                                                                                                               | 0.216              | 5.504                            | 0.104          | 0.917          |                              |  |                              |  |                   |                    |                    |                |                |  |              |        |       |        |        |       |  |              |       |       |       |       |       |               |       |       |        |        |       |                  |       |       |       |       |       |                |       |       |        |        |       |              |       |       |       |        |       |                  |       |       |       |       |       |  |       |       |       |       |       |
|                                    | 1.243                                                                                                                                                                                                                                                                                                                                                                                                                                                                                                                                                                                                                                                                                                                                                                                                                                                                                                                                                                                                                                                                                                                                                                                                                                                                               | 0.757              | 2.041                            | 0.861          | 0.389          |                              |  |                              |  |                   |                    |                    |                |                |  |              |        |       |        |        |       |  |              |       |       |       |       |       |               |       |       |        |        |       |                  |       |       |       |       |       |                |       |       |        |        |       |              |       |       |       |        |       |                  |       |       |       |       |       |  |       |       |       |       |       |
| Cognitive Impairment               | <table border="1"> <thead> <tr> <th><u>Study name</u></th> <th colspan="5"><u>Statistics for each study</u></th> <th><u>Odds ratio and 95% CI</u></th> </tr> <tr> <th></th> <th><b>Odds ratio</b></th> <th><b>Lower limit</b></th> <th><b>Upper limit</b></th> <th><b>Z-Value</b></th> <th><b>p-Value</b></th> <th></th> </tr> </thead> <tbody> <tr> <td>Baba, 2007</td> <td>0.752</td> <td>0.161</td> <td>3.504</td> <td>-0.363</td> <td>0.717</td> <td rowspan="5"> </td> </tr> <tr> <td>Mu, 2013</td> <td>1.241</td> <td>0.463</td> <td>3.329</td> <td>0.430</td> <td>0.668</td> </tr> <tr> <td>Silbert, 2008</td> <td>0.898</td> <td>0.455</td> <td>1.774</td> <td>-0.309</td> <td>0.757</td> </tr> <tr> <td>Trubnikova, 2014</td> <td>1.576</td> <td>0.680</td> <td>3.654</td> <td>1.060</td> <td>0.289</td> </tr> <tr> <td></td> <td>1.108</td> <td>0.709</td> <td>1.730</td> <td>0.449</td> <td>0.653</td> </tr> </tbody> </table>                                                                                                                                                                                                                                                                                                                                           | <u>Study name</u>  | <u>Statistics for each study</u> |                |                |                              |  | <u>Odds ratio and 95% CI</u> |  | <b>Odds ratio</b> | <b>Lower limit</b> | <b>Upper limit</b> | <b>Z-Value</b> | <b>p-Value</b> |  | Baba, 2007   | 0.752  | 0.161 | 3.504  | -0.363 | 0.717 |  | Mu, 2013     | 1.241 | 0.463 | 3.329 | 0.430 | 0.668 | Silbert, 2008 | 0.898 | 0.455 | 1.774  | -0.309 | 0.757 | Trubnikova, 2014 | 1.576 | 0.680 | 3.654 | 1.060 | 0.289 |                | 1.108 | 0.709 | 1.730  | 0.449  | 0.653 |              |       |       |       |        |       |                  |       |       |       |       |       |  |       |       |       |       |       |
| <u>Study name</u>                  | <u>Statistics for each study</u>                                                                                                                                                                                                                                                                                                                                                                                                                                                                                                                                                                                                                                                                                                                                                                                                                                                                                                                                                                                                                                                                                                                                                                                                                                                    |                    |                                  |                |                | <u>Odds ratio and 95% CI</u> |  |                              |  |                   |                    |                    |                |                |  |              |        |       |        |        |       |  |              |       |       |       |       |       |               |       |       |        |        |       |                  |       |       |       |       |       |                |       |       |        |        |       |              |       |       |       |        |       |                  |       |       |       |       |       |  |       |       |       |       |       |
|                                    | <b>Odds ratio</b>                                                                                                                                                                                                                                                                                                                                                                                                                                                                                                                                                                                                                                                                                                                                                                                                                                                                                                                                                                                                                                                                                                                                                                                                                                                                   | <b>Lower limit</b> | <b>Upper limit</b>               | <b>Z-Value</b> | <b>p-Value</b> |                              |  |                              |  |                   |                    |                    |                |                |  |              |        |       |        |        |       |  |              |       |       |       |       |       |               |       |       |        |        |       |                  |       |       |       |       |       |                |       |       |        |        |       |              |       |       |       |        |       |                  |       |       |       |       |       |  |       |       |       |       |       |
| Baba, 2007                         | 0.752                                                                                                                                                                                                                                                                                                                                                                                                                                                                                                                                                                                                                                                                                                                                                                                                                                                                                                                                                                                                                                                                                                                                                                                                                                                                               | 0.161              | 3.504                            | -0.363         | 0.717          |                              |  |                              |  |                   |                    |                    |                |                |  |              |        |       |        |        |       |  |              |       |       |       |       |       |               |       |       |        |        |       |                  |       |       |       |       |       |                |       |       |        |        |       |              |       |       |       |        |       |                  |       |       |       |       |       |  |       |       |       |       |       |
| Mu, 2013                           | 1.241                                                                                                                                                                                                                                                                                                                                                                                                                                                                                                                                                                                                                                                                                                                                                                                                                                                                                                                                                                                                                                                                                                                                                                                                                                                                               | 0.463              | 3.329                            | 0.430          | 0.668          |                              |  |                              |  |                   |                    |                    |                |                |  |              |        |       |        |        |       |  |              |       |       |       |       |       |               |       |       |        |        |       |                  |       |       |       |       |       |                |       |       |        |        |       |              |       |       |       |        |       |                  |       |       |       |       |       |  |       |       |       |       |       |
| Silbert, 2008                      | 0.898                                                                                                                                                                                                                                                                                                                                                                                                                                                                                                                                                                                                                                                                                                                                                                                                                                                                                                                                                                                                                                                                                                                                                                                                                                                                               | 0.455              | 1.774                            | -0.309         | 0.757          |                              |  |                              |  |                   |                    |                    |                |                |  |              |        |       |        |        |       |  |              |       |       |       |       |       |               |       |       |        |        |       |                  |       |       |       |       |       |                |       |       |        |        |       |              |       |       |       |        |       |                  |       |       |       |       |       |  |       |       |       |       |       |
| Trubnikova, 2014                   | 1.576                                                                                                                                                                                                                                                                                                                                                                                                                                                                                                                                                                                                                                                                                                                                                                                                                                                                                                                                                                                                                                                                                                                                                                                                                                                                               | 0.680              | 3.654                            | 1.060          | 0.289          |                              |  |                              |  |                   |                    |                    |                |                |  |              |        |       |        |        |       |  |              |       |       |       |       |       |               |       |       |        |        |       |                  |       |       |       |       |       |                |       |       |        |        |       |              |       |       |       |        |       |                  |       |       |       |       |       |  |       |       |       |       |       |
|                                    | 1.108                                                                                                                                                                                                                                                                                                                                                                                                                                                                                                                                                                                                                                                                                                                                                                                                                                                                                                                                                                                                                                                                                                                                                                                                                                                                               | 0.709              | 1.730                            | 0.449          | 0.653          |                              |  |                              |  |                   |                    |                    |                |                |  |              |        |       |        |        |       |  |              |       |       |       |       |       |               |       |       |        |        |       |                  |       |       |       |       |       |                |       |       |        |        |       |              |       |       |       |        |       |                  |       |       |       |       |       |  |       |       |       |       |       |
| Depression                         | <table border="1"> <thead> <tr> <th><u>Study name</u></th> <th colspan="5"><u>Statistics for each study</u></th> <th><u>Odds ratio and 95% CI</u></th> </tr> <tr> <th></th> <th><b>Odds ratio</b></th> <th><b>Lower limit</b></th> <th><b>Upper limit</b></th> <th><b>Z-Value</b></th> <th><b>p-Value</b></th> <th></th> </tr> </thead> <tbody> <tr> <td>Kadoi, 2011b</td> <td>6.217</td> <td>2.199</td> <td>17.580</td> <td>3.446</td> <td>0.001</td> <td rowspan="3"> </td> </tr> <tr> <td>Slater, 2009</td> <td>1.985</td> <td>0.791</td> <td>4.980</td> <td>1.461</td> <td>0.144</td> </tr> <tr> <td></td> <td>3.421</td> <td>1.119</td> <td>10.458</td> <td>2.157</td> <td>0.031</td> </tr> </tbody> </table>                                                                                                                                                                                                                                                                                                                                                                                                                                                                                                                                                                  | <u>Study name</u>  | <u>Statistics for each study</u> |                |                |                              |  | <u>Odds ratio and 95% CI</u> |  | <b>Odds ratio</b> | <b>Lower limit</b> | <b>Upper limit</b> | <b>Z-Value</b> | <b>p-Value</b> |  | Kadoi, 2011b | 6.217  | 2.199 | 17.580 | 3.446  | 0.001 |  | Slater, 2009 | 1.985 | 0.791 | 4.980 | 1.461 | 0.144 |               | 3.421 | 1.119 | 10.458 | 2.157  | 0.031 |                  |       |       |       |       |       |                |       |       |        |        |       |              |       |       |       |        |       |                  |       |       |       |       |       |  |       |       |       |       |       |
| <u>Study name</u>                  | <u>Statistics for each study</u>                                                                                                                                                                                                                                                                                                                                                                                                                                                                                                                                                                                                                                                                                                                                                                                                                                                                                                                                                                                                                                                                                                                                                                                                                                                    |                    |                                  |                |                | <u>Odds ratio and 95% CI</u> |  |                              |  |                   |                    |                    |                |                |  |              |        |       |        |        |       |  |              |       |       |       |       |       |               |       |       |        |        |       |                  |       |       |       |       |       |                |       |       |        |        |       |              |       |       |       |        |       |                  |       |       |       |       |       |  |       |       |       |       |       |
|                                    | <b>Odds ratio</b>                                                                                                                                                                                                                                                                                                                                                                                                                                                                                                                                                                                                                                                                                                                                                                                                                                                                                                                                                                                                                                                                                                                                                                                                                                                                   | <b>Lower limit</b> | <b>Upper limit</b>               | <b>Z-Value</b> | <b>p-Value</b> |                              |  |                              |  |                   |                    |                    |                |                |  |              |        |       |        |        |       |  |              |       |       |       |       |       |               |       |       |        |        |       |                  |       |       |       |       |       |                |       |       |        |        |       |              |       |       |       |        |       |                  |       |       |       |       |       |  |       |       |       |       |       |
| Kadoi, 2011b                       | 6.217                                                                                                                                                                                                                                                                                                                                                                                                                                                                                                                                                                                                                                                                                                                                                                                                                                                                                                                                                                                                                                                                                                                                                                                                                                                                               | 2.199              | 17.580                           | 3.446          | 0.001          |                              |  |                              |  |                   |                    |                    |                |                |  |              |        |       |        |        |       |  |              |       |       |       |       |       |               |       |       |        |        |       |                  |       |       |       |       |       |                |       |       |        |        |       |              |       |       |       |        |       |                  |       |       |       |       |       |  |       |       |       |       |       |
| Slater, 2009                       | 1.985                                                                                                                                                                                                                                                                                                                                                                                                                                                                                                                                                                                                                                                                                                                                                                                                                                                                                                                                                                                                                                                                                                                                                                                                                                                                               | 0.791              | 4.980                            | 1.461          | 0.144          |                              |  |                              |  |                   |                    |                    |                |                |  |              |        |       |        |        |       |  |              |       |       |       |       |       |               |       |       |        |        |       |                  |       |       |       |       |       |                |       |       |        |        |       |              |       |       |       |        |       |                  |       |       |       |       |       |  |       |       |       |       |       |
|                                    | 3.421                                                                                                                                                                                                                                                                                                                                                                                                                                                                                                                                                                                                                                                                                                                                                                                                                                                                                                                                                                                                                                                                                                                                                                                                                                                                               | 1.119              | 10.458                           | 2.157          | 0.031          |                              |  |                              |  |                   |                    |                    |                |                |  |              |        |       |        |        |       |  |              |       |       |       |       |       |               |       |       |        |        |       |                  |       |       |       |       |       |                |       |       |        |        |       |              |       |       |       |        |       |                  |       |       |       |       |       |  |       |       |       |       |       |

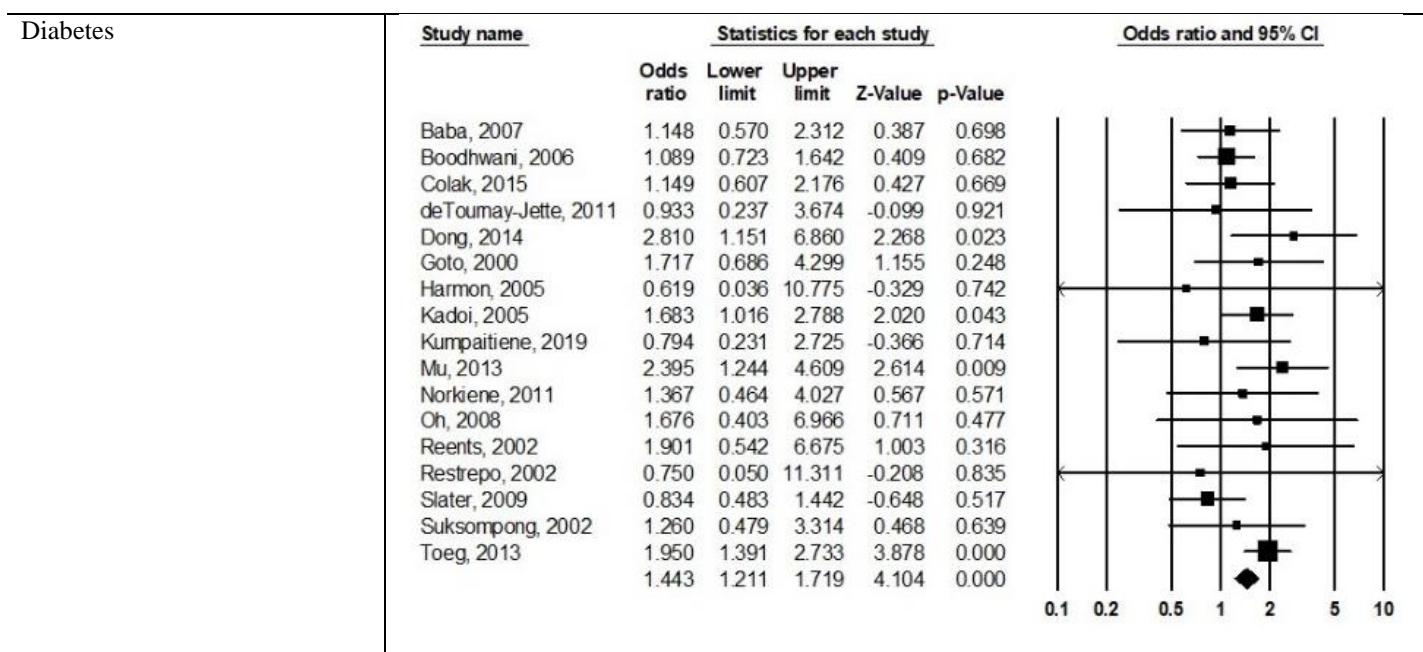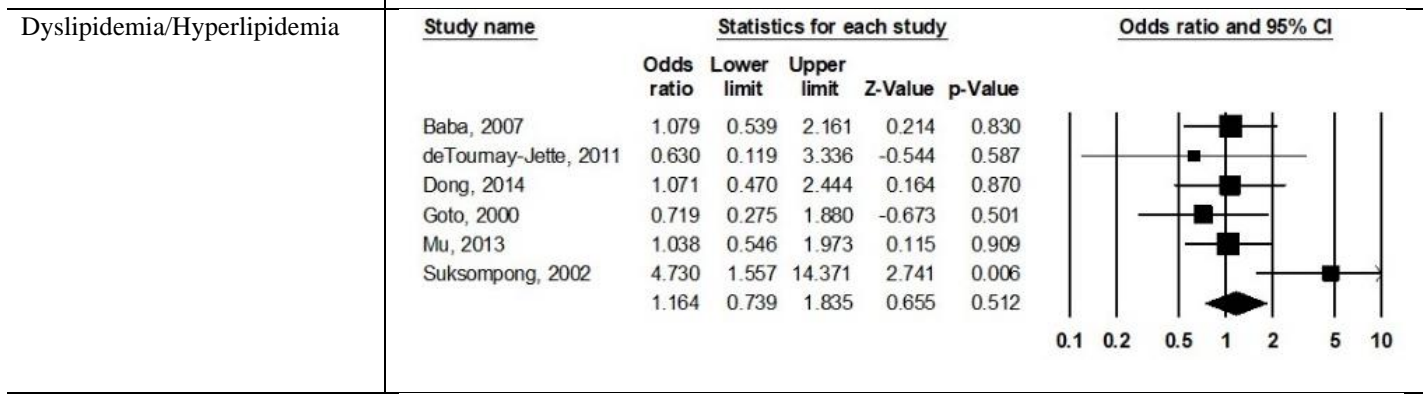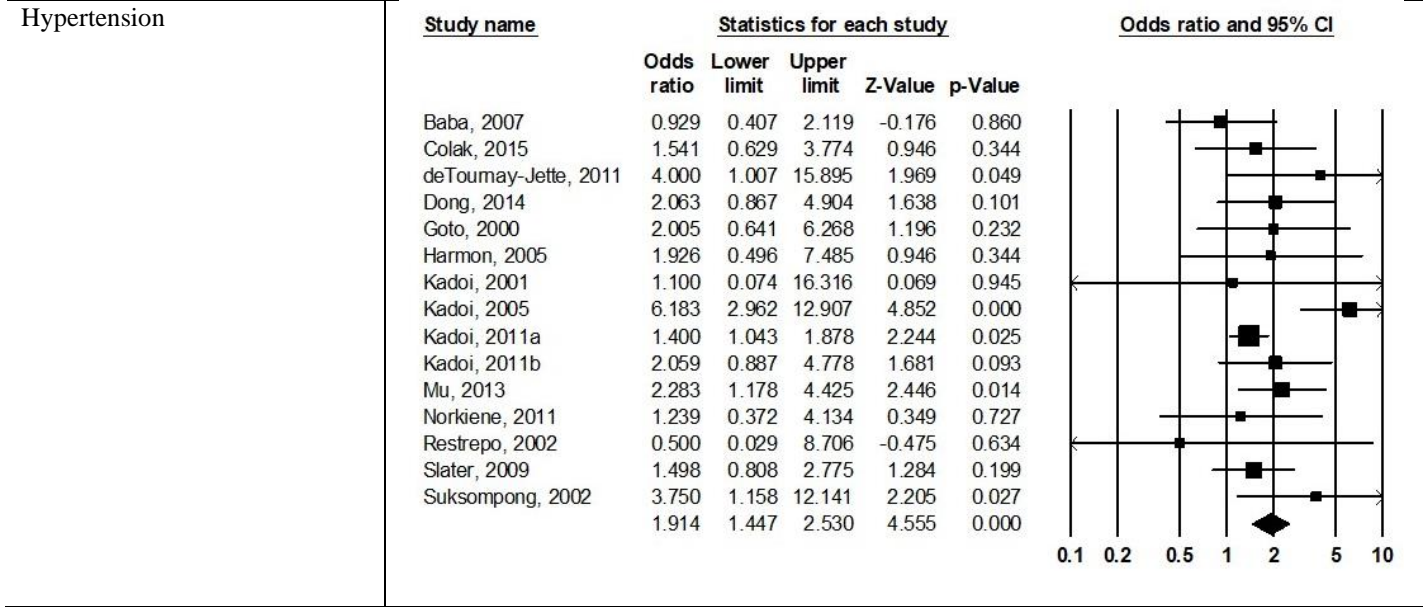

| Sex (male) | <u>Study name</u>     | <u>Statistics for each study</u> |                    |                    |                |                | <u>Odds ratio and 95% CI</u> |  |
|------------|-----------------------|----------------------------------|--------------------|--------------------|----------------|----------------|------------------------------|--|
|            |                       | <u>Odds ratio</u>                | <u>Lower limit</u> | <u>Upper limit</u> | <u>Z-Value</u> | <u>p-Value</u> |                              |  |
|            |                       | Baba, 2007                       | 0.972              | 0.459              | 2.060          | -0.074         | 0.941                        |  |
|            | Boodhwani, 2006       | 1.206                            | 0.692              | 2.102              | 0.660          | 0.509          |                              |  |
|            | Christiansen, 2016    | 1.667                            | 0.048              | 58.281             | 0.282          | 0.778          |                              |  |
|            | Colak, 2015           | 1.322                            | 0.651              | 2.685              | 0.772          | 0.440          |                              |  |
|            | deTournay-Jette, 2011 | 0.475                            | 0.053              | 4.255              | -0.665         | 0.506          |                              |  |
|            | Dong, 2014            | 0.811                            | 0.317              | 2.074              | -0.437         | 0.662          |                              |  |
|            | Goto, 2000            | 1.324                            | 0.486              | 3.607              | 0.548          | 0.584          |                              |  |
|            | Hall, 1999            | 0.574                            | 0.117              | 2.810              | -0.685         | 0.494          |                              |  |
|            | Harmon, 2005          | 0.750                            | 0.118              | 4.760              | -0.305         | 0.760          |                              |  |
|            | Kadoi, 2005           | 0.896                            | 0.429              | 1.871              | -0.292         | 0.770          |                              |  |
|            | Kadoi, 2011b          | 0.786                            | 0.299              | 2.061              | -0.490         | 0.624          |                              |  |
|            | Kumpaitiene, 2019     | 1.488                            | 0.504              | 4.393              | 0.719          | 0.472          |                              |  |
|            | Mu, 2013              | 0.988                            | 0.415              | 2.355              | -0.027         | 0.979          |                              |  |
|            | Norkiene, 2011        | 1.270                            | 0.517              | 3.121              | 0.522          | 0.602          |                              |  |
|            | Reents, 2002          | 1.037                            | 0.169              | 6.375              | 0.039          | 0.969          |                              |  |
|            | Restrepo, 2002        | 3.267                            | 0.130              | 82.036             | 0.720          | 0.472          |                              |  |
|            | Slater, 2009          | 0.795                            | 0.387              | 1.634              | -0.625         | 0.532          |                              |  |
|            | Suksompong, 2002      | 0.913                            | 0.297              | 2.809              | -0.159         | 0.874          |                              |  |
|            |                       | 1.026                            | 0.818              | 1.286              | 0.223          | 0.824          |                              |  |

  

| Kidney injury | <u>Study name</u> | <u>Statistics for each study</u> |                    |                    |                |                | <u>Odds ratio and 95% CI</u> |
|---------------|-------------------|----------------------------------|--------------------|--------------------|----------------|----------------|------------------------------|
|               |                   | <u>Odds ratio</u>                | <u>Lower limit</u> | <u>Upper limit</u> | <u>Z-Value</u> | <u>p-Value</u> |                              |
|               |                   | Baba, 2007                       | 0.860              | 0.278              | 2.662          | -0.262         | 0.793                        |
|               | Colak, 2015       | 3.668                            | 0.135              | 99.509             | 0.772          | 0.440          |                              |
|               | Slater, 2009      | 0.411                            | 0.119              | 1.416              | -1.409         | 0.159          |                              |
|               | Suksompong, 2002  | 4.200                            | 1.018              | 17.327             | 1.985          | 0.047          |                              |
|               |                   | 1.213                            | 0.396              | 3.716              | 0.338          | 0.735          |                              |

  

| Previous MI <90 days | <u>Study name</u> | <u>Statistics for each study</u> |                    |                    |                |                | <u>Odds ratio and 95% CI</u> |
|----------------------|-------------------|----------------------------------|--------------------|--------------------|----------------|----------------|------------------------------|
|                      |                   | <u>Odds ratio</u>                | <u>Lower limit</u> | <u>Upper limit</u> | <u>Z-Value</u> | <u>p-Value</u> |                              |
|                      |                   | Colak, 2015                      | 1.155              | 0.376              | 3.552          | 0.252          | 0.801                        |
|                      | Norkiene, 2011    | 1.621                            | 0.528              | 4.975              | 0.844          | 0.399          |                              |
|                      | Suksompong, 2002  | 0.750                            | 0.240              | 2.342              | -0.495         | 0.620          |                              |
|                      |                   | 1.124                            | 0.586              | 2.156              | 0.353          | 0.724          |                              |

  

| Previous MI history/ever | <u>Study name</u> | <u>Statistics for each study</u> |                    |                    |                |                | <u>Odds ratio and 95% CI</u> |
|--------------------------|-------------------|----------------------------------|--------------------|--------------------|----------------|----------------|------------------------------|
|                          |                   | <u>Odds ratio</u>                | <u>Lower limit</u> | <u>Upper limit</u> | <u>Z-Value</u> | <u>p-Value</u> |                              |
|                          |                   | Dong, 2014                       | 1.831              | 0.800              | 4.191          | 1.431          | 0.152                        |
|                          | Harmon, 2005      | 1.246                            | 0.312              | 4.977              | 0.311          | 0.755          |                              |
|                          | Liu, 2009         | 1.776                            | 1.046              | 3.015              | 2.127          | 0.033          |                              |
|                          | Mu, 2013          | 0.698                            | 0.369              | 1.322              | -1.103         | 0.270          |                              |
|                          | Norkiene, 2011    | 0.719                            | 0.354              | 1.458              | -0.915         | 0.360          |                              |
|                          | Slater, 2009      | 1.345                            | 0.590              | 3.063              | 0.705          | 0.481          |                              |
|                          | Suksompong, 2002  | 1.030                            | 0.352              | 3.011              | 0.054          | 0.957          |                              |
|                          |                   | 1.160                            | 0.825              | 1.630              | 0.852          | 0.394          |                              |



| Previous stroke, TIA, CVA | <u>Study name</u> | <u>Statistics for each study</u> |                    |                    |                |                | <u>Odds ratio and 95% CI</u> |
|---------------------------|-------------------|----------------------------------|--------------------|--------------------|----------------|----------------|------------------------------|
|                           |                   | <b>Odds ratio</b>                | <b>Lower limit</b> | <b>Upper limit</b> | <b>Z-Value</b> | <b>p-Value</b> |                              |
|                           | Baba, 2007        | 4.799                            | 1.899              | 12.129             | 3.315          | 0.001          |                              |
| Dong, 2014                | 2.814             | 0.795                            | 9.959              | 1.604              | 0.109          |                |                              |
| Mu, 2013                  | 1.445             | 0.576                            | 3.623              | 0.785              | 0.433          |                |                              |
| Restrepo, 2002            | 4.500             | 0.190                            | 106.823            | 0.931              | 0.352          |                |                              |
| Slater, 2009              | 1.652             | 0.553                            | 4.938              | 0.899              | 0.369          |                |                              |
|                           | 2.435             | 1.468                            | 4.038              | 3.447              | 0.001          |                |                              |

| PVD             | <u>Study name</u> | <u>Statistics for each study</u> |                    |                    |                |                | <u>Odds ratio and 95% CI</u> |
|-----------------|-------------------|----------------------------------|--------------------|--------------------|----------------|----------------|------------------------------|
|                 |                   | <b>Odds ratio</b>                | <b>Lower limit</b> | <b>Upper limit</b> | <b>Z-Value</b> | <b>p-Value</b> |                              |
|                 | Baba, 2007        | 0.414                            | 0.120              | 1.432              | -1.393         | 0.164          |                              |
| Boodhwani, 2006 | 0.990             | 0.560                            | 1.748              | -0.036             | 0.971          |                |                              |
| Goto, 2000      | 4.353             | 1.185                            | 15.987             | 2.216              | 0.027          |                |                              |
| Restrepo, 2002  | 0.486             | 0.018                            | 12.929             | -0.431             | 0.666          |                |                              |
|                 | 1.087             | 0.417                            | 2.831              | 0.170              | 0.865          |                |                              |

| Smoking current/history | <u>Study name</u> | <u>Statistics for each study</u> |                    |                    |                |                | <u>Odds ratio and 95% CI</u> |
|-------------------------|-------------------|----------------------------------|--------------------|--------------------|----------------|----------------|------------------------------|
|                         |                   | <b>Odds ratio</b>                | <b>Lower limit</b> | <b>Upper limit</b> | <b>Z-Value</b> | <b>p-Value</b> |                              |
|                         | Baba, 2007        | 0.902                            | 0.445              | 1.826              | -0.287         | 0.774          |                              |
| Dong, 2014              | 1.075             | 0.475                            | 2.431              | 0.174              | 0.862          |                |                              |
| Kadoi, 2001             | 0.100             | 0.005                            | 1.924              | -1.526             | 0.127          |                |                              |
| Kadoi, 2005             | 1.033             | 0.553                            | 1.931              | 0.103              | 0.918          |                |                              |
| Liu, 2009               | 0.337             | 0.189                            | 0.603              | -3.668             | 0.000          |                |                              |
| Mu, 2013                | 1.382             | 0.740                            | 2.581              | 1.016              | 0.310          |                |                              |
| Norkiene, 2011          | 1.693             | 0.755                            | 3.798              | 1.278              | 0.201          |                |                              |
| Restrepo, 2002          | 15.000            | 0.597                            | 376.696            | 1.647              | 0.100          |                |                              |
| Slater, 2009            | 1.729             | 0.997                            | 2.997              | 1.950              | 0.051          |                |                              |
|                         | 1.033             | 0.642                            | 1.664              | 0.135              | 0.892          |                |                              |

**Pre-Operative (Continuous)**

| Age (years)           | <u>Study name</u> | <u>Statistics for each study</u> |                       |                 |                    |                    |                |                | <u>Difference in means and 95% CI</u> |
|-----------------------|-------------------|----------------------------------|-----------------------|-----------------|--------------------|--------------------|----------------|----------------|---------------------------------------|
|                       |                   | <b>Difference in means</b>       | <b>Standard error</b> | <b>Variance</b> | <b>Lower limit</b> | <b>Upper limit</b> | <b>Z-Value</b> | <b>p-Value</b> |                                       |
|                       | Baba, 2007        | 0.700                            | 0.987                 | 0.973           | -1.234             | 2.634              | 0.710          | 0.478          |                                       |
| Boodhwani, 2006       | 0.500             | 0.038                            | 0.001                 | 0.425           | 0.575              | 13.005             | 0.000          |                |                                       |
| Christiansen, 2016    | 1.900             | 10.530                           | 110.882               | -18.739         | 22.539             | 0.180              | 0.857          |                |                                       |
| Colak, 2015           | 7.300             | 1.091                            | 1.191                 | 5.151           | 9.439              | 6.689              | 0.000          |                |                                       |
| deTournay-Jette, 2011 | -3.010            | 1.539                            | 2.388                 | -6.028          | 0.006              | -1.956             | 0.050          |                |                                       |
| Dong, 2014            | 6.000             | 1.525                            | 2.330                 | 3.008           | 8.992              | 3.891              | 0.000          |                |                                       |
| Goto, 2000            | 1.500             | 1.168                            | 1.364                 | -0.789          | 3.789              | 1.284              | 0.199          |                |                                       |
| Hall, 1999            | 3.300             | 3.234                            | 10.480                | -3.039          | 9.639              | 1.020              | 0.308          |                |                                       |
| Hamon, 2005           | 8.300             | 2.425                            | 5.883                 | 3.546           | 13.054             | 3.422              | 0.001          |                |                                       |
| Kadoi, 2005           | 7.000             | 1.500                            | 2.251                 | 4.060           | 9.940              | 4.666              | 0.000          |                |                                       |
| Kadoi, 2011b          | -0.200            | 1.098                            | 1.206                 | -2.352          | 1.952              | -0.182             | 0.855          |                |                                       |
| Kumpaleniene, 2019    | 4.000             | 2.176                            | 4.736                 | -0.265          | 8.265              | 1.838              | 0.068          |                |                                       |
| Liu, 2009             | 2.000             | 1.117                            | 1.247                 | -0.188          | 4.188              | 1.791              | 0.073          |                |                                       |
| Mu, 2013              | 2.000             | 1.413                            | 1.996                 | -0.769          | 4.769              | 1.416              | 0.157          |                |                                       |
| Newman, 1987          | 6.800             | 2.045                            | 4.180                 | 2.793           | 10.807             | 3.326              | 0.001          |                |                                       |
| Norkiene, 2011        | 2.400             | 1.290                            | 1.655                 | -0.129          | 4.929              | 1.860              | 0.063          |                |                                       |
| Reants, 2002          | 1.000             | 2.485                            | 6.075                 | -3.831          | 5.831              | 0.408              | 0.885          |                |                                       |
| Restrepo, 2002        | 0.570             | 6.428                            | 41.315                | -12.028         | 13.168             | 0.089              | 0.929          |                |                                       |
| Scott, 2002           | 5.900             | 0.392                            | 0.153                 | 5.132           | 6.668              | 15.059             | 0.000          |                |                                       |
| Slater, 2009          | -0.020            | 1.313                            | 1.724                 | -2.593          | 2.553              | -0.015             | 0.988          |                |                                       |
| Stump, 1996           | 2.000             | 1.810                            | 3.276                 | -1.548          | 5.548              | 1.105              | 0.269          |                |                                       |
| Sylviris, 1998        | -2.800            | 2.776                            | 7.704                 | -8.240          | 2.640              | -1.009             | 0.313          |                |                                       |
|                       | 2.688             | 0.760                            | 0.577                 | 1.198           | 4.177              | 3.537              | 0.000          |                |                                       |

| BMI                   | <table border="1"> <thead> <tr> <th rowspan="2">Study name</th> <th colspan="6">Statistics for each study</th> </tr> <tr> <th>Difference in means</th> <th>Standard error</th> <th>Variance</th> <th>Lower limit</th> <th>Upper limit</th> <th>Z-Value</th> <th>p-Value</th> </tr> </thead> <tbody> <tr> <td>Boothwani, 2006</td> <td>-0.200</td> <td>0.029</td> <td>0.001</td> <td>-0.257</td> <td>-0.143</td> <td>-6.936</td> <td>0.000</td> </tr> <tr> <td>deTournay-Jette, 2011</td> <td>1.510</td> <td>1.495</td> <td>2.234</td> <td>-1.420</td> <td>4.440</td> <td>1.010</td> <td>0.312</td> </tr> <tr> <td>Dong, 2014</td> <td>0.500</td> <td>0.521</td> <td>0.271</td> <td>-0.521</td> <td>1.521</td> <td>0.960</td> <td>0.337</td> </tr> <tr> <td>Mu, 2013</td> <td>-0.200</td> <td>0.470</td> <td>0.220</td> <td>-1.120</td> <td>0.720</td> <td>-0.426</td> <td>0.670</td> </tr> <tr> <td>Norkiene, 2011</td> <td>-1.000</td> <td>1.721</td> <td>2.963</td> <td>-4.374</td> <td>2.374</td> <td>-0.581</td> <td>0.561</td> </tr> <tr> <td></td> <td>-0.197</td> <td>0.029</td> <td>0.001</td> <td>-0.254</td> <td>-0.141</td> <td>-6.874</td> <td>0.000</td> </tr> </tbody> </table>                                                                                                                                         | Study name     | Statistics for each study |             |             |         |         |  | Difference in means | Standard error | Variance | Lower limit | Upper limit | Z-Value | p-Value | Boothwani, 2006       | -0.200 | 0.029 | 0.001 | -0.257 | -0.143 | -6.936 | 0.000 | deTournay-Jette, 2011 | 1.510  | 1.495 | 2.234 | -1.420 | 4.440 | 1.010  | 0.312 | Dong, 2014       | 0.500  | 0.521 | 0.271 | -0.521 | 1.521 | 0.960  | 0.337 | Mu, 2013                              | -0.200 | 0.470 | 0.220 | -1.120 | 0.720 | -0.426 | 0.670 | Norkiene, 2011                      | -1.000 | 1.721 | 2.963 | -4.374 | 2.374 | -0.581 | 0.561 |                                       | -0.197 | 0.029 | 0.001 | -0.254 | -0.141 | -6.874 | 0.000 | <p>Difference in means and 95% CI</p> |        |       |       |        |       |        |       |                                       |
|-----------------------|---------------------------------------------------------------------------------------------------------------------------------------------------------------------------------------------------------------------------------------------------------------------------------------------------------------------------------------------------------------------------------------------------------------------------------------------------------------------------------------------------------------------------------------------------------------------------------------------------------------------------------------------------------------------------------------------------------------------------------------------------------------------------------------------------------------------------------------------------------------------------------------------------------------------------------------------------------------------------------------------------------------------------------------------------------------------------------------------------------------------------------------------------------------------------------------------------------------------------------------------------------------------------------------------------------------------------------------|----------------|---------------------------|-------------|-------------|---------|---------|--|---------------------|----------------|----------|-------------|-------------|---------|---------|-----------------------|--------|-------|-------|--------|--------|--------|-------|-----------------------|--------|-------|-------|--------|-------|--------|-------|------------------|--------|-------|-------|--------|-------|--------|-------|---------------------------------------|--------|-------|-------|--------|-------|--------|-------|-------------------------------------|--------|-------|-------|--------|-------|--------|-------|---------------------------------------|--------|-------|-------|--------|--------|--------|-------|---------------------------------------|--------|-------|-------|--------|-------|--------|-------|---------------------------------------|
| Study name            | Statistics for each study                                                                                                                                                                                                                                                                                                                                                                                                                                                                                                                                                                                                                                                                                                                                                                                                                                                                                                                                                                                                                                                                                                                                                                                                                                                                                                             |                |                           |             |             |         |         |  |                     |                |          |             |             |         |         |                       |        |       |       |        |        |        |       |                       |        |       |       |        |       |        |       |                  |        |       |       |        |       |        |       |                                       |        |       |       |        |       |        |       |                                     |        |       |       |        |       |        |       |                                       |        |       |       |        |        |        |       |                                       |        |       |       |        |       |        |       |                                       |
|                       | Difference in means                                                                                                                                                                                                                                                                                                                                                                                                                                                                                                                                                                                                                                                                                                                                                                                                                                                                                                                                                                                                                                                                                                                                                                                                                                                                                                                   | Standard error | Variance                  | Lower limit | Upper limit | Z-Value | p-Value |  |                     |                |          |             |             |         |         |                       |        |       |       |        |        |        |       |                       |        |       |       |        |       |        |       |                  |        |       |       |        |       |        |       |                                       |        |       |       |        |       |        |       |                                     |        |       |       |        |       |        |       |                                       |        |       |       |        |        |        |       |                                       |        |       |       |        |       |        |       |                                       |
| Boothwani, 2006       | -0.200                                                                                                                                                                                                                                                                                                                                                                                                                                                                                                                                                                                                                                                                                                                                                                                                                                                                                                                                                                                                                                                                                                                                                                                                                                                                                                                                | 0.029          | 0.001                     | -0.257      | -0.143      | -6.936  | 0.000   |  |                     |                |          |             |             |         |         |                       |        |       |       |        |        |        |       |                       |        |       |       |        |       |        |       |                  |        |       |       |        |       |        |       |                                       |        |       |       |        |       |        |       |                                     |        |       |       |        |       |        |       |                                       |        |       |       |        |        |        |       |                                       |        |       |       |        |       |        |       |                                       |
| deTournay-Jette, 2011 | 1.510                                                                                                                                                                                                                                                                                                                                                                                                                                                                                                                                                                                                                                                                                                                                                                                                                                                                                                                                                                                                                                                                                                                                                                                                                                                                                                                                 | 1.495          | 2.234                     | -1.420      | 4.440       | 1.010   | 0.312   |  |                     |                |          |             |             |         |         |                       |        |       |       |        |        |        |       |                       |        |       |       |        |       |        |       |                  |        |       |       |        |       |        |       |                                       |        |       |       |        |       |        |       |                                     |        |       |       |        |       |        |       |                                       |        |       |       |        |        |        |       |                                       |        |       |       |        |       |        |       |                                       |
| Dong, 2014            | 0.500                                                                                                                                                                                                                                                                                                                                                                                                                                                                                                                                                                                                                                                                                                                                                                                                                                                                                                                                                                                                                                                                                                                                                                                                                                                                                                                                 | 0.521          | 0.271                     | -0.521      | 1.521       | 0.960   | 0.337   |  |                     |                |          |             |             |         |         |                       |        |       |       |        |        |        |       |                       |        |       |       |        |       |        |       |                  |        |       |       |        |       |        |       |                                       |        |       |       |        |       |        |       |                                     |        |       |       |        |       |        |       |                                       |        |       |       |        |        |        |       |                                       |        |       |       |        |       |        |       |                                       |
| Mu, 2013              | -0.200                                                                                                                                                                                                                                                                                                                                                                                                                                                                                                                                                                                                                                                                                                                                                                                                                                                                                                                                                                                                                                                                                                                                                                                                                                                                                                                                | 0.470          | 0.220                     | -1.120      | 0.720       | -0.426  | 0.670   |  |                     |                |          |             |             |         |         |                       |        |       |       |        |        |        |       |                       |        |       |       |        |       |        |       |                  |        |       |       |        |       |        |       |                                       |        |       |       |        |       |        |       |                                     |        |       |       |        |       |        |       |                                       |        |       |       |        |        |        |       |                                       |        |       |       |        |       |        |       |                                       |
| Norkiene, 2011        | -1.000                                                                                                                                                                                                                                                                                                                                                                                                                                                                                                                                                                                                                                                                                                                                                                                                                                                                                                                                                                                                                                                                                                                                                                                                                                                                                                                                | 1.721          | 2.963                     | -4.374      | 2.374       | -0.581  | 0.561   |  |                     |                |          |             |             |         |         |                       |        |       |       |        |        |        |       |                       |        |       |       |        |       |        |       |                  |        |       |       |        |       |        |       |                                       |        |       |       |        |       |        |       |                                     |        |       |       |        |       |        |       |                                       |        |       |       |        |        |        |       |                                       |        |       |       |        |       |        |       |                                       |
|                       | -0.197                                                                                                                                                                                                                                                                                                                                                                                                                                                                                                                                                                                                                                                                                                                                                                                                                                                                                                                                                                                                                                                                                                                                                                                                                                                                                                                                | 0.029          | 0.001                     | -0.254      | -0.141      | -6.874  | 0.000   |  |                     |                |          |             |             |         |         |                       |        |       |       |        |        |        |       |                       |        |       |       |        |       |        |       |                  |        |       |       |        |       |        |       |                                       |        |       |       |        |       |        |       |                                     |        |       |       |        |       |        |       |                                       |        |       |       |        |        |        |       |                                       |        |       |       |        |       |        |       |                                       |
| Cognition: All tests  | <table border="1"> <thead> <tr> <th rowspan="2">Study name</th> <th colspan="6">Statistics for each study</th> </tr> <tr> <th>Std diff in means</th> <th>Standard error</th> <th>Variance</th> <th>Lower limit</th> <th>Upper limit</th> <th>Z-Value</th> <th>p-Value</th> </tr> </thead> <tbody> <tr> <td>deTournay-Jette, 2011</td> <td>0.823</td> <td>0.344</td> <td>0.119</td> <td>0.148</td> <td>1.498</td> <td>2.390</td> <td>0.017</td> </tr> <tr> <td>Hall, 1999</td> <td>0.237</td> <td>0.346</td> <td>0.120</td> <td>-0.441</td> <td>0.916</td> <td>0.685</td> <td>0.493</td> </tr> <tr> <td>Kumpatiene, 2019</td> <td>-0.294</td> <td>0.271</td> <td>0.073</td> <td>-0.824</td> <td>0.236</td> <td>-1.086</td> <td>0.277</td> </tr> <tr> <td></td> <td>0.230</td> <td>0.334</td> <td>0.112</td> <td>-0.425</td> <td>0.884</td> <td>0.687</td> <td>0.492</td> </tr> </tbody> </table>                                                                                                                                                                                                                                                                                                                                                                                                                                       | Study name     | Statistics for each study |             |             |         |         |  | Std diff in means   | Standard error | Variance | Lower limit | Upper limit | Z-Value | p-Value | deTournay-Jette, 2011 | 0.823  | 0.344 | 0.119 | 0.148  | 1.498  | 2.390  | 0.017 | Hall, 1999            | 0.237  | 0.346 | 0.120 | -0.441 | 0.916 | 0.685  | 0.493 | Kumpatiene, 2019 | -0.294 | 0.271 | 0.073 | -0.824 | 0.236 | -1.086 | 0.277 |                                       | 0.230  | 0.334 | 0.112 | -0.425 | 0.884 | 0.687  | 0.492 | <p>Std diff in means and 95% CI</p> |        |       |       |        |       |        |       |                                       |        |       |       |        |        |        |       |                                       |        |       |       |        |       |        |       |                                       |
| Study name            | Statistics for each study                                                                                                                                                                                                                                                                                                                                                                                                                                                                                                                                                                                                                                                                                                                                                                                                                                                                                                                                                                                                                                                                                                                                                                                                                                                                                                             |                |                           |             |             |         |         |  |                     |                |          |             |             |         |         |                       |        |       |       |        |        |        |       |                       |        |       |       |        |       |        |       |                  |        |       |       |        |       |        |       |                                       |        |       |       |        |       |        |       |                                     |        |       |       |        |       |        |       |                                       |        |       |       |        |        |        |       |                                       |        |       |       |        |       |        |       |                                       |
|                       | Std diff in means                                                                                                                                                                                                                                                                                                                                                                                                                                                                                                                                                                                                                                                                                                                                                                                                                                                                                                                                                                                                                                                                                                                                                                                                                                                                                                                     | Standard error | Variance                  | Lower limit | Upper limit | Z-Value | p-Value |  |                     |                |          |             |             |         |         |                       |        |       |       |        |        |        |       |                       |        |       |       |        |       |        |       |                  |        |       |       |        |       |        |       |                                       |        |       |       |        |       |        |       |                                     |        |       |       |        |       |        |       |                                       |        |       |       |        |        |        |       |                                       |        |       |       |        |       |        |       |                                       |
| deTournay-Jette, 2011 | 0.823                                                                                                                                                                                                                                                                                                                                                                                                                                                                                                                                                                                                                                                                                                                                                                                                                                                                                                                                                                                                                                                                                                                                                                                                                                                                                                                                 | 0.344          | 0.119                     | 0.148       | 1.498       | 2.390   | 0.017   |  |                     |                |          |             |             |         |         |                       |        |       |       |        |        |        |       |                       |        |       |       |        |       |        |       |                  |        |       |       |        |       |        |       |                                       |        |       |       |        |       |        |       |                                     |        |       |       |        |       |        |       |                                       |        |       |       |        |        |        |       |                                       |        |       |       |        |       |        |       |                                       |
| Hall, 1999            | 0.237                                                                                                                                                                                                                                                                                                                                                                                                                                                                                                                                                                                                                                                                                                                                                                                                                                                                                                                                                                                                                                                                                                                                                                                                                                                                                                                                 | 0.346          | 0.120                     | -0.441      | 0.916       | 0.685   | 0.493   |  |                     |                |          |             |             |         |         |                       |        |       |       |        |        |        |       |                       |        |       |       |        |       |        |       |                  |        |       |       |        |       |        |       |                                       |        |       |       |        |       |        |       |                                     |        |       |       |        |       |        |       |                                       |        |       |       |        |        |        |       |                                       |        |       |       |        |       |        |       |                                       |
| Kumpatiene, 2019      | -0.294                                                                                                                                                                                                                                                                                                                                                                                                                                                                                                                                                                                                                                                                                                                                                                                                                                                                                                                                                                                                                                                                                                                                                                                                                                                                                                                                | 0.271          | 0.073                     | -0.824      | 0.236       | -1.086  | 0.277   |  |                     |                |          |             |             |         |         |                       |        |       |       |        |        |        |       |                       |        |       |       |        |       |        |       |                  |        |       |       |        |       |        |       |                                       |        |       |       |        |       |        |       |                                     |        |       |       |        |       |        |       |                                       |        |       |       |        |        |        |       |                                       |        |       |       |        |       |        |       |                                       |
|                       | 0.230                                                                                                                                                                                                                                                                                                                                                                                                                                                                                                                                                                                                                                                                                                                                                                                                                                                                                                                                                                                                                                                                                                                                                                                                                                                                                                                                 | 0.334          | 0.112                     | -0.425      | 0.884       | 0.687   | 0.492   |  |                     |                |          |             |             |         |         |                       |        |       |       |        |        |        |       |                       |        |       |       |        |       |        |       |                  |        |       |       |        |       |        |       |                                       |        |       |       |        |       |        |       |                                     |        |       |       |        |       |        |       |                                       |        |       |       |        |        |        |       |                                       |        |       |       |        |       |        |       |                                       |
| Cognition: MMSE only  | <table border="1"> <thead> <tr> <th rowspan="2">Study name</th> <th colspan="6">Statistics for each study</th> </tr> <tr> <th>Difference in means</th> <th>Standard error</th> <th>Variance</th> <th>Lower limit</th> <th>Upper limit</th> <th>Z-Value</th> <th>p-Value</th> </tr> </thead> <tbody> <tr> <td>deTournay-Jette, 2011</td> <td>-1.110</td> <td>0.453</td> <td>0.205</td> <td>0.223</td> <td>1.997</td> <td>2.452</td> <td>0.014</td> </tr> <tr> <td>Kumpatiene, 2019</td> <td>-0.600</td> <td>0.550</td> <td>0.302</td> <td>-1.677</td> <td>0.477</td> <td>-1.092</td> <td>0.275</td> </tr> <tr> <td></td> <td>0.283</td> <td>0.855</td> <td>0.730</td> <td>-1.391</td> <td>1.958</td> <td>0.332</td> <td>0.740</td> </tr> </tbody> </table>                                                                                                                                                                                                                                                                                                                                                                                                                                                                                                                                                                             | Study name     | Statistics for each study |             |             |         |         |  | Difference in means | Standard error | Variance | Lower limit | Upper limit | Z-Value | p-Value | deTournay-Jette, 2011 | -1.110 | 0.453 | 0.205 | 0.223  | 1.997  | 2.452  | 0.014 | Kumpatiene, 2019      | -0.600 | 0.550 | 0.302 | -1.677 | 0.477 | -1.092 | 0.275 |                  | 0.283  | 0.855 | 0.730 | -1.391 | 1.958 | 0.332  | 0.740 | <p>Difference in means and 95% CI</p> |        |       |       |        |       |        |       |                                     |        |       |       |        |       |        |       |                                       |        |       |       |        |        |        |       |                                       |        |       |       |        |       |        |       |                                       |
| Study name            | Statistics for each study                                                                                                                                                                                                                                                                                                                                                                                                                                                                                                                                                                                                                                                                                                                                                                                                                                                                                                                                                                                                                                                                                                                                                                                                                                                                                                             |                |                           |             |             |         |         |  |                     |                |          |             |             |         |         |                       |        |       |       |        |        |        |       |                       |        |       |       |        |       |        |       |                  |        |       |       |        |       |        |       |                                       |        |       |       |        |       |        |       |                                     |        |       |       |        |       |        |       |                                       |        |       |       |        |        |        |       |                                       |        |       |       |        |       |        |       |                                       |
|                       | Difference in means                                                                                                                                                                                                                                                                                                                                                                                                                                                                                                                                                                                                                                                                                                                                                                                                                                                                                                                                                                                                                                                                                                                                                                                                                                                                                                                   | Standard error | Variance                  | Lower limit | Upper limit | Z-Value | p-Value |  |                     |                |          |             |             |         |         |                       |        |       |       |        |        |        |       |                       |        |       |       |        |       |        |       |                  |        |       |       |        |       |        |       |                                       |        |       |       |        |       |        |       |                                     |        |       |       |        |       |        |       |                                       |        |       |       |        |        |        |       |                                       |        |       |       |        |       |        |       |                                       |
| deTournay-Jette, 2011 | -1.110                                                                                                                                                                                                                                                                                                                                                                                                                                                                                                                                                                                                                                                                                                                                                                                                                                                                                                                                                                                                                                                                                                                                                                                                                                                                                                                                | 0.453          | 0.205                     | 0.223       | 1.997       | 2.452   | 0.014   |  |                     |                |          |             |             |         |         |                       |        |       |       |        |        |        |       |                       |        |       |       |        |       |        |       |                  |        |       |       |        |       |        |       |                                       |        |       |       |        |       |        |       |                                     |        |       |       |        |       |        |       |                                       |        |       |       |        |        |        |       |                                       |        |       |       |        |       |        |       |                                       |
| Kumpatiene, 2019      | -0.600                                                                                                                                                                                                                                                                                                                                                                                                                                                                                                                                                                                                                                                                                                                                                                                                                                                                                                                                                                                                                                                                                                                                                                                                                                                                                                                                | 0.550          | 0.302                     | -1.677      | 0.477       | -1.092  | 0.275   |  |                     |                |          |             |             |         |         |                       |        |       |       |        |        |        |       |                       |        |       |       |        |       |        |       |                  |        |       |       |        |       |        |       |                                       |        |       |       |        |       |        |       |                                     |        |       |       |        |       |        |       |                                       |        |       |       |        |        |        |       |                                       |        |       |       |        |       |        |       |                                       |
|                       | 0.283                                                                                                                                                                                                                                                                                                                                                                                                                                                                                                                                                                                                                                                                                                                                                                                                                                                                                                                                                                                                                                                                                                                                                                                                                                                                                                                                 | 0.855          | 0.730                     | -1.391      | 1.958       | 0.332   | 0.740   |  |                     |                |          |             |             |         |         |                       |        |       |       |        |        |        |       |                       |        |       |       |        |       |        |       |                  |        |       |       |        |       |        |       |                                       |        |       |       |        |       |        |       |                                     |        |       |       |        |       |        |       |                                       |        |       |       |        |        |        |       |                                       |        |       |       |        |       |        |       |                                       |
| Depression: All tests | <table border="1"> <thead> <tr> <th rowspan="2">Study name</th> <th colspan="6">Statistics for each study</th> </tr> <tr> <th>Std diff in means</th> <th>Standard error</th> <th>Variance</th> <th>Lower limit</th> <th>Upper limit</th> <th>Z-Value</th> <th>p-Value</th> </tr> </thead> <tbody> <tr> <td>Harmon, 2004</td> <td>-0.310</td> <td>0.340</td> <td>0.116</td> <td>-0.976</td> <td>0.357</td> <td>-0.910</td> <td>0.363</td> </tr> <tr> <td>Harmon, 2005</td> <td>-0.039</td> <td>0.342</td> <td>0.117</td> <td>-0.709</td> <td>0.632</td> <td>-0.113</td> <td>0.910</td> </tr> <tr> <td>Kadoi, 2011b</td> <td>2.024</td> <td>0.259</td> <td>0.067</td> <td>1.516</td> <td>2.532</td> <td>7.807</td> <td>0.000</td> </tr> <tr> <td>Silbert, 2006</td> <td>0.274</td> <td>0.151</td> <td>0.023</td> <td>-0.023</td> <td>0.571</td> <td>1.807</td> <td>0.071</td> </tr> <tr> <td></td> <td>0.501</td> <td>0.499</td> <td>0.249</td> <td>-0.478</td> <td>1.479</td> <td>1.003</td> <td>0.316</td> </tr> </tbody> </table>                                                                                                                                                                                                                                                                                                    | Study name     | Statistics for each study |             |             |         |         |  | Std diff in means   | Standard error | Variance | Lower limit | Upper limit | Z-Value | p-Value | Harmon, 2004          | -0.310 | 0.340 | 0.116 | -0.976 | 0.357  | -0.910 | 0.363 | Harmon, 2005          | -0.039 | 0.342 | 0.117 | -0.709 | 0.632 | -0.113 | 0.910 | Kadoi, 2011b     | 2.024  | 0.259 | 0.067 | 1.516  | 2.532 | 7.807  | 0.000 | Silbert, 2006                         | 0.274  | 0.151 | 0.023 | -0.023 | 0.571 | 1.807  | 0.071 |                                     | 0.501  | 0.499 | 0.249 | -0.478 | 1.479 | 1.003  | 0.316 | <p>Std diff in means and 95% CI</p>   |        |       |       |        |        |        |       |                                       |        |       |       |        |       |        |       |                                       |
| Study name            | Statistics for each study                                                                                                                                                                                                                                                                                                                                                                                                                                                                                                                                                                                                                                                                                                                                                                                                                                                                                                                                                                                                                                                                                                                                                                                                                                                                                                             |                |                           |             |             |         |         |  |                     |                |          |             |             |         |         |                       |        |       |       |        |        |        |       |                       |        |       |       |        |       |        |       |                  |        |       |       |        |       |        |       |                                       |        |       |       |        |       |        |       |                                     |        |       |       |        |       |        |       |                                       |        |       |       |        |        |        |       |                                       |        |       |       |        |       |        |       |                                       |
|                       | Std diff in means                                                                                                                                                                                                                                                                                                                                                                                                                                                                                                                                                                                                                                                                                                                                                                                                                                                                                                                                                                                                                                                                                                                                                                                                                                                                                                                     | Standard error | Variance                  | Lower limit | Upper limit | Z-Value | p-Value |  |                     |                |          |             |             |         |         |                       |        |       |       |        |        |        |       |                       |        |       |       |        |       |        |       |                  |        |       |       |        |       |        |       |                                       |        |       |       |        |       |        |       |                                     |        |       |       |        |       |        |       |                                       |        |       |       |        |        |        |       |                                       |        |       |       |        |       |        |       |                                       |
| Harmon, 2004          | -0.310                                                                                                                                                                                                                                                                                                                                                                                                                                                                                                                                                                                                                                                                                                                                                                                                                                                                                                                                                                                                                                                                                                                                                                                                                                                                                                                                | 0.340          | 0.116                     | -0.976      | 0.357       | -0.910  | 0.363   |  |                     |                |          |             |             |         |         |                       |        |       |       |        |        |        |       |                       |        |       |       |        |       |        |       |                  |        |       |       |        |       |        |       |                                       |        |       |       |        |       |        |       |                                     |        |       |       |        |       |        |       |                                       |        |       |       |        |        |        |       |                                       |        |       |       |        |       |        |       |                                       |
| Harmon, 2005          | -0.039                                                                                                                                                                                                                                                                                                                                                                                                                                                                                                                                                                                                                                                                                                                                                                                                                                                                                                                                                                                                                                                                                                                                                                                                                                                                                                                                | 0.342          | 0.117                     | -0.709      | 0.632       | -0.113  | 0.910   |  |                     |                |          |             |             |         |         |                       |        |       |       |        |        |        |       |                       |        |       |       |        |       |        |       |                  |        |       |       |        |       |        |       |                                       |        |       |       |        |       |        |       |                                     |        |       |       |        |       |        |       |                                       |        |       |       |        |        |        |       |                                       |        |       |       |        |       |        |       |                                       |
| Kadoi, 2011b          | 2.024                                                                                                                                                                                                                                                                                                                                                                                                                                                                                                                                                                                                                                                                                                                                                                                                                                                                                                                                                                                                                                                                                                                                                                                                                                                                                                                                 | 0.259          | 0.067                     | 1.516       | 2.532       | 7.807   | 0.000   |  |                     |                |          |             |             |         |         |                       |        |       |       |        |        |        |       |                       |        |       |       |        |       |        |       |                  |        |       |       |        |       |        |       |                                       |        |       |       |        |       |        |       |                                     |        |       |       |        |       |        |       |                                       |        |       |       |        |        |        |       |                                       |        |       |       |        |       |        |       |                                       |
| Silbert, 2006         | 0.274                                                                                                                                                                                                                                                                                                                                                                                                                                                                                                                                                                                                                                                                                                                                                                                                                                                                                                                                                                                                                                                                                                                                                                                                                                                                                                                                 | 0.151          | 0.023                     | -0.023      | 0.571       | 1.807   | 0.071   |  |                     |                |          |             |             |         |         |                       |        |       |       |        |        |        |       |                       |        |       |       |        |       |        |       |                  |        |       |       |        |       |        |       |                                       |        |       |       |        |       |        |       |                                     |        |       |       |        |       |        |       |                                       |        |       |       |        |        |        |       |                                       |        |       |       |        |       |        |       |                                       |
|                       | 0.501                                                                                                                                                                                                                                                                                                                                                                                                                                                                                                                                                                                                                                                                                                                                                                                                                                                                                                                                                                                                                                                                                                                                                                                                                                                                                                                                 | 0.499          | 0.249                     | -0.478      | 1.479       | 1.003   | 0.316   |  |                     |                |          |             |             |         |         |                       |        |       |       |        |        |        |       |                       |        |       |       |        |       |        |       |                  |        |       |       |        |       |        |       |                                       |        |       |       |        |       |        |       |                                     |        |       |       |        |       |        |       |                                       |        |       |       |        |        |        |       |                                       |        |       |       |        |       |        |       |                                       |
| Education (years)     | <table border="1"> <thead> <tr> <th rowspan="2">Study name</th> <th colspan="6">Statistics for each study</th> </tr> <tr> <th>Difference in means</th> <th>Standard error</th> <th>Variance</th> <th>Lower limit</th> <th>Upper limit</th> <th>Z-Value</th> <th>p-Value</th> </tr> </thead> <tbody> <tr> <td>Colak, 2015</td> <td>-1.200</td> <td>0.492</td> <td>0.242</td> <td>-2.164</td> <td>-0.236</td> <td>-2.440</td> <td>0.015</td> </tr> <tr> <td>deTournay-Jette, 2011</td> <td>1.070</td> <td>1.436</td> <td>2.063</td> <td>-1.745</td> <td>3.885</td> <td>0.745</td> <td>0.456</td> </tr> <tr> <td>Hall, 1999</td> <td>-1.600</td> <td>0.913</td> <td>0.834</td> <td>-3.390</td> <td>0.190</td> <td>-1.752</td> <td>0.080</td> </tr> <tr> <td>Harmon, 2005</td> <td>-1.300</td> <td>1.217</td> <td>1.480</td> <td>-3.684</td> <td>1.084</td> <td>-1.069</td> <td>0.285</td> </tr> <tr> <td>Kumpatiene, 2019</td> <td>0.500</td> <td>1.327</td> <td>1.761</td> <td>-2.101</td> <td>3.101</td> <td>0.377</td> <td>0.706</td> </tr> <tr> <td>Mu, 2013</td> <td>0.600</td> <td>0.534</td> <td>0.285</td> <td>-0.446</td> <td>1.646</td> <td>1.125</td> <td>0.261</td> </tr> <tr> <td></td> <td>-0.435</td> <td>0.493</td> <td>0.243</td> <td>-1.400</td> <td>0.531</td> <td>-0.883</td> <td>0.377</td> </tr> </tbody> </table> | Study name     | Statistics for each study |             |             |         |         |  | Difference in means | Standard error | Variance | Lower limit | Upper limit | Z-Value | p-Value | Colak, 2015           | -1.200 | 0.492 | 0.242 | -2.164 | -0.236 | -2.440 | 0.015 | deTournay-Jette, 2011 | 1.070  | 1.436 | 2.063 | -1.745 | 3.885 | 0.745  | 0.456 | Hall, 1999       | -1.600 | 0.913 | 0.834 | -3.390 | 0.190 | -1.752 | 0.080 | Harmon, 2005                          | -1.300 | 1.217 | 1.480 | -3.684 | 1.084 | -1.069 | 0.285 | Kumpatiene, 2019                    | 0.500  | 1.327 | 1.761 | -2.101 | 3.101 | 0.377  | 0.706 | Mu, 2013                              | 0.600  | 0.534 | 0.285 | -0.446 | 1.646  | 1.125  | 0.261 |                                       | -0.435 | 0.493 | 0.243 | -1.400 | 0.531 | -0.883 | 0.377 | <p>Difference in means and 95% CI</p> |
| Study name            | Statistics for each study                                                                                                                                                                                                                                                                                                                                                                                                                                                                                                                                                                                                                                                                                                                                                                                                                                                                                                                                                                                                                                                                                                                                                                                                                                                                                                             |                |                           |             |             |         |         |  |                     |                |          |             |             |         |         |                       |        |       |       |        |        |        |       |                       |        |       |       |        |       |        |       |                  |        |       |       |        |       |        |       |                                       |        |       |       |        |       |        |       |                                     |        |       |       |        |       |        |       |                                       |        |       |       |        |        |        |       |                                       |        |       |       |        |       |        |       |                                       |
|                       | Difference in means                                                                                                                                                                                                                                                                                                                                                                                                                                                                                                                                                                                                                                                                                                                                                                                                                                                                                                                                                                                                                                                                                                                                                                                                                                                                                                                   | Standard error | Variance                  | Lower limit | Upper limit | Z-Value | p-Value |  |                     |                |          |             |             |         |         |                       |        |       |       |        |        |        |       |                       |        |       |       |        |       |        |       |                  |        |       |       |        |       |        |       |                                       |        |       |       |        |       |        |       |                                     |        |       |       |        |       |        |       |                                       |        |       |       |        |        |        |       |                                       |        |       |       |        |       |        |       |                                       |
| Colak, 2015           | -1.200                                                                                                                                                                                                                                                                                                                                                                                                                                                                                                                                                                                                                                                                                                                                                                                                                                                                                                                                                                                                                                                                                                                                                                                                                                                                                                                                | 0.492          | 0.242                     | -2.164      | -0.236      | -2.440  | 0.015   |  |                     |                |          |             |             |         |         |                       |        |       |       |        |        |        |       |                       |        |       |       |        |       |        |       |                  |        |       |       |        |       |        |       |                                       |        |       |       |        |       |        |       |                                     |        |       |       |        |       |        |       |                                       |        |       |       |        |        |        |       |                                       |        |       |       |        |       |        |       |                                       |
| deTournay-Jette, 2011 | 1.070                                                                                                                                                                                                                                                                                                                                                                                                                                                                                                                                                                                                                                                                                                                                                                                                                                                                                                                                                                                                                                                                                                                                                                                                                                                                                                                                 | 1.436          | 2.063                     | -1.745      | 3.885       | 0.745   | 0.456   |  |                     |                |          |             |             |         |         |                       |        |       |       |        |        |        |       |                       |        |       |       |        |       |        |       |                  |        |       |       |        |       |        |       |                                       |        |       |       |        |       |        |       |                                     |        |       |       |        |       |        |       |                                       |        |       |       |        |        |        |       |                                       |        |       |       |        |       |        |       |                                       |
| Hall, 1999            | -1.600                                                                                                                                                                                                                                                                                                                                                                                                                                                                                                                                                                                                                                                                                                                                                                                                                                                                                                                                                                                                                                                                                                                                                                                                                                                                                                                                | 0.913          | 0.834                     | -3.390      | 0.190       | -1.752  | 0.080   |  |                     |                |          |             |             |         |         |                       |        |       |       |        |        |        |       |                       |        |       |       |        |       |        |       |                  |        |       |       |        |       |        |       |                                       |        |       |       |        |       |        |       |                                     |        |       |       |        |       |        |       |                                       |        |       |       |        |        |        |       |                                       |        |       |       |        |       |        |       |                                       |
| Harmon, 2005          | -1.300                                                                                                                                                                                                                                                                                                                                                                                                                                                                                                                                                                                                                                                                                                                                                                                                                                                                                                                                                                                                                                                                                                                                                                                                                                                                                                                                | 1.217          | 1.480                     | -3.684      | 1.084       | -1.069  | 0.285   |  |                     |                |          |             |             |         |         |                       |        |       |       |        |        |        |       |                       |        |       |       |        |       |        |       |                  |        |       |       |        |       |        |       |                                       |        |       |       |        |       |        |       |                                     |        |       |       |        |       |        |       |                                       |        |       |       |        |        |        |       |                                       |        |       |       |        |       |        |       |                                       |
| Kumpatiene, 2019      | 0.500                                                                                                                                                                                                                                                                                                                                                                                                                                                                                                                                                                                                                                                                                                                                                                                                                                                                                                                                                                                                                                                                                                                                                                                                                                                                                                                                 | 1.327          | 1.761                     | -2.101      | 3.101       | 0.377   | 0.706   |  |                     |                |          |             |             |         |         |                       |        |       |       |        |        |        |       |                       |        |       |       |        |       |        |       |                  |        |       |       |        |       |        |       |                                       |        |       |       |        |       |        |       |                                     |        |       |       |        |       |        |       |                                       |        |       |       |        |        |        |       |                                       |        |       |       |        |       |        |       |                                       |
| Mu, 2013              | 0.600                                                                                                                                                                                                                                                                                                                                                                                                                                                                                                                                                                                                                                                                                                                                                                                                                                                                                                                                                                                                                                                                                                                                                                                                                                                                                                                                 | 0.534          | 0.285                     | -0.446      | 1.646       | 1.125   | 0.261   |  |                     |                |          |             |             |         |         |                       |        |       |       |        |        |        |       |                       |        |       |       |        |       |        |       |                  |        |       |       |        |       |        |       |                                       |        |       |       |        |       |        |       |                                     |        |       |       |        |       |        |       |                                       |        |       |       |        |        |        |       |                                       |        |       |       |        |       |        |       |                                       |
|                       | -0.435                                                                                                                                                                                                                                                                                                                                                                                                                                                                                                                                                                                                                                                                                                                                                                                                                                                                                                                                                                                                                                                                                                                                                                                                                                                                                                                                | 0.493          | 0.243                     | -1.400      | 0.531       | -0.883  | 0.377   |  |                     |                |          |             |             |         |         |                       |        |       |       |        |        |        |       |                       |        |       |       |        |       |        |       |                  |        |       |       |        |       |        |       |                                       |        |       |       |        |       |        |       |                                     |        |       |       |        |       |        |       |                                       |        |       |       |        |        |        |       |                                       |        |       |       |        |       |        |       |                                       |
| EuroSCORE             | <table border="1"> <thead> <tr> <th rowspan="2">Study name</th> <th colspan="6">Statistics for each study</th> </tr> <tr> <th>Difference in means</th> <th>Standard error</th> <th>Variance</th> <th>Lower limit</th> <th>Upper limit</th> <th>Z-Value</th> <th>p-Value</th> </tr> </thead> <tbody> <tr> <td>Colak, 2015</td> <td>1.000</td> <td>0.245</td> <td>0.060</td> <td>0.519</td> <td>1.481</td> <td>4.075</td> <td>0.000</td> </tr> <tr> <td>Dong, 2014</td> <td>0.600</td> <td>0.214</td> <td>0.046</td> <td>0.181</td> <td>1.019</td> <td>2.806</td> <td>0.005</td> </tr> <tr> <td>Mu, 2013</td> <td>0.459</td> <td>0.311</td> <td>0.097</td> <td>-0.151</td> <td>1.068</td> <td>1.475</td> <td>0.140</td> </tr> <tr> <td>Norkiene, 2011</td> <td>1.000</td> <td>0.382</td> <td>0.146</td> <td>0.252</td> <td>1.748</td> <td>2.621</td> <td>0.009</td> </tr> <tr> <td></td> <td>0.742</td> <td>0.134</td> <td>0.018</td> <td>0.480</td> <td>1.005</td> <td>5.540</td> <td>0.000</td> </tr> </tbody> </table>                                                                                                                                                                                                                                                                                                               | Study name     | Statistics for each study |             |             |         |         |  | Difference in means | Standard error | Variance | Lower limit | Upper limit | Z-Value | p-Value | Colak, 2015           | 1.000  | 0.245 | 0.060 | 0.519  | 1.481  | 4.075  | 0.000 | Dong, 2014            | 0.600  | 0.214 | 0.046 | 0.181  | 1.019 | 2.806  | 0.005 | Mu, 2013         | 0.459  | 0.311 | 0.097 | -0.151 | 1.068 | 1.475  | 0.140 | Norkiene, 2011                        | 1.000  | 0.382 | 0.146 | 0.252  | 1.748 | 2.621  | 0.009 |                                     | 0.742  | 0.134 | 0.018 | 0.480  | 1.005 | 5.540  | 0.000 | <p>Difference in means and 95% CI</p> |        |       |       |        |        |        |       |                                       |        |       |       |        |       |        |       |                                       |
| Study name            | Statistics for each study                                                                                                                                                                                                                                                                                                                                                                                                                                                                                                                                                                                                                                                                                                                                                                                                                                                                                                                                                                                                                                                                                                                                                                                                                                                                                                             |                |                           |             |             |         |         |  |                     |                |          |             |             |         |         |                       |        |       |       |        |        |        |       |                       |        |       |       |        |       |        |       |                  |        |       |       |        |       |        |       |                                       |        |       |       |        |       |        |       |                                     |        |       |       |        |       |        |       |                                       |        |       |       |        |        |        |       |                                       |        |       |       |        |       |        |       |                                       |
|                       | Difference in means                                                                                                                                                                                                                                                                                                                                                                                                                                                                                                                                                                                                                                                                                                                                                                                                                                                                                                                                                                                                                                                                                                                                                                                                                                                                                                                   | Standard error | Variance                  | Lower limit | Upper limit | Z-Value | p-Value |  |                     |                |          |             |             |         |         |                       |        |       |       |        |        |        |       |                       |        |       |       |        |       |        |       |                  |        |       |       |        |       |        |       |                                       |        |       |       |        |       |        |       |                                     |        |       |       |        |       |        |       |                                       |        |       |       |        |        |        |       |                                       |        |       |       |        |       |        |       |                                       |
| Colak, 2015           | 1.000                                                                                                                                                                                                                                                                                                                                                                                                                                                                                                                                                                                                                                                                                                                                                                                                                                                                                                                                                                                                                                                                                                                                                                                                                                                                                                                                 | 0.245          | 0.060                     | 0.519       | 1.481       | 4.075   | 0.000   |  |                     |                |          |             |             |         |         |                       |        |       |       |        |        |        |       |                       |        |       |       |        |       |        |       |                  |        |       |       |        |       |        |       |                                       |        |       |       |        |       |        |       |                                     |        |       |       |        |       |        |       |                                       |        |       |       |        |        |        |       |                                       |        |       |       |        |       |        |       |                                       |
| Dong, 2014            | 0.600                                                                                                                                                                                                                                                                                                                                                                                                                                                                                                                                                                                                                                                                                                                                                                                                                                                                                                                                                                                                                                                                                                                                                                                                                                                                                                                                 | 0.214          | 0.046                     | 0.181       | 1.019       | 2.806   | 0.005   |  |                     |                |          |             |             |         |         |                       |        |       |       |        |        |        |       |                       |        |       |       |        |       |        |       |                  |        |       |       |        |       |        |       |                                       |        |       |       |        |       |        |       |                                     |        |       |       |        |       |        |       |                                       |        |       |       |        |        |        |       |                                       |        |       |       |        |       |        |       |                                       |
| Mu, 2013              | 0.459                                                                                                                                                                                                                                                                                                                                                                                                                                                                                                                                                                                                                                                                                                                                                                                                                                                                                                                                                                                                                                                                                                                                                                                                                                                                                                                                 | 0.311          | 0.097                     | -0.151      | 1.068       | 1.475   | 0.140   |  |                     |                |          |             |             |         |         |                       |        |       |       |        |        |        |       |                       |        |       |       |        |       |        |       |                  |        |       |       |        |       |        |       |                                       |        |       |       |        |       |        |       |                                     |        |       |       |        |       |        |       |                                       |        |       |       |        |        |        |       |                                       |        |       |       |        |       |        |       |                                       |
| Norkiene, 2011        | 1.000                                                                                                                                                                                                                                                                                                                                                                                                                                                                                                                                                                                                                                                                                                                                                                                                                                                                                                                                                                                                                                                                                                                                                                                                                                                                                                                                 | 0.382          | 0.146                     | 0.252       | 1.748       | 2.621   | 0.009   |  |                     |                |          |             |             |         |         |                       |        |       |       |        |        |        |       |                       |        |       |       |        |       |        |       |                  |        |       |       |        |       |        |       |                                       |        |       |       |        |       |        |       |                                     |        |       |       |        |       |        |       |                                       |        |       |       |        |        |        |       |                                       |        |       |       |        |       |        |       |                                       |
|                       | 0.742                                                                                                                                                                                                                                                                                                                                                                                                                                                                                                                                                                                                                                                                                                                                                                                                                                                                                                                                                                                                                                                                                                                                                                                                                                                                                                                                 | 0.134          | 0.018                     | 0.480       | 1.005       | 5.540   | 0.000   |  |                     |                |          |             |             |         |         |                       |        |       |       |        |        |        |       |                       |        |       |       |        |       |        |       |                  |        |       |       |        |       |        |       |                                       |        |       |       |        |       |        |       |                                     |        |       |       |        |       |        |       |                                       |        |       |       |        |        |        |       |                                       |        |       |       |        |       |        |       |                                       |



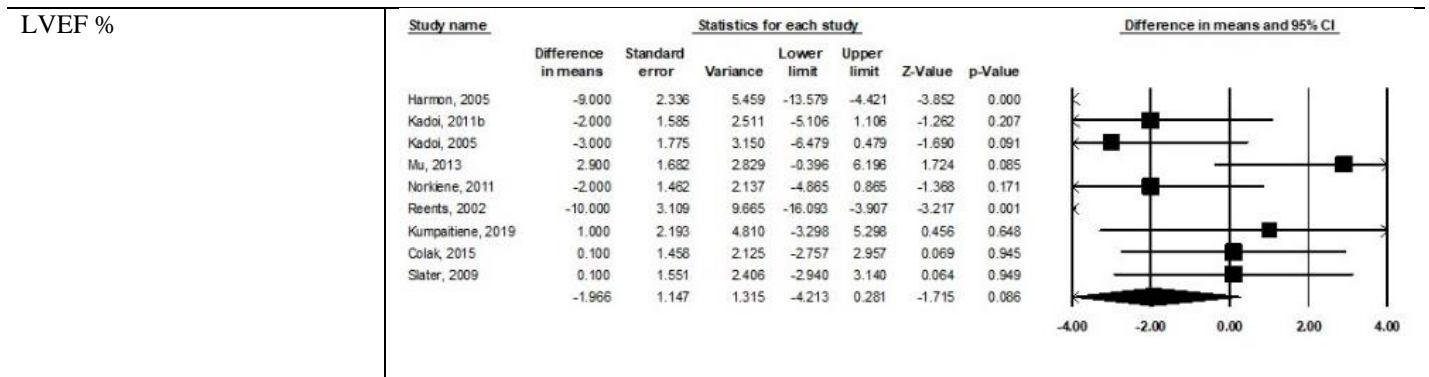

**Intra-Operative (Continuous)**

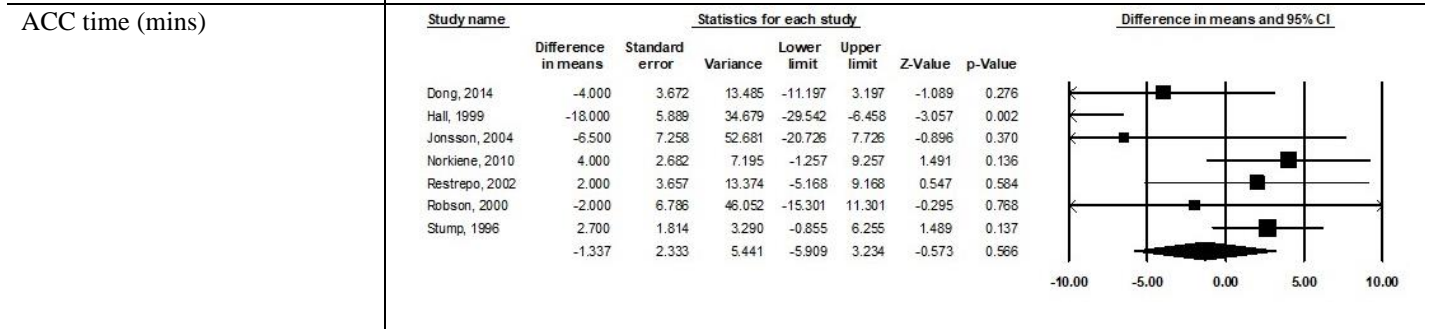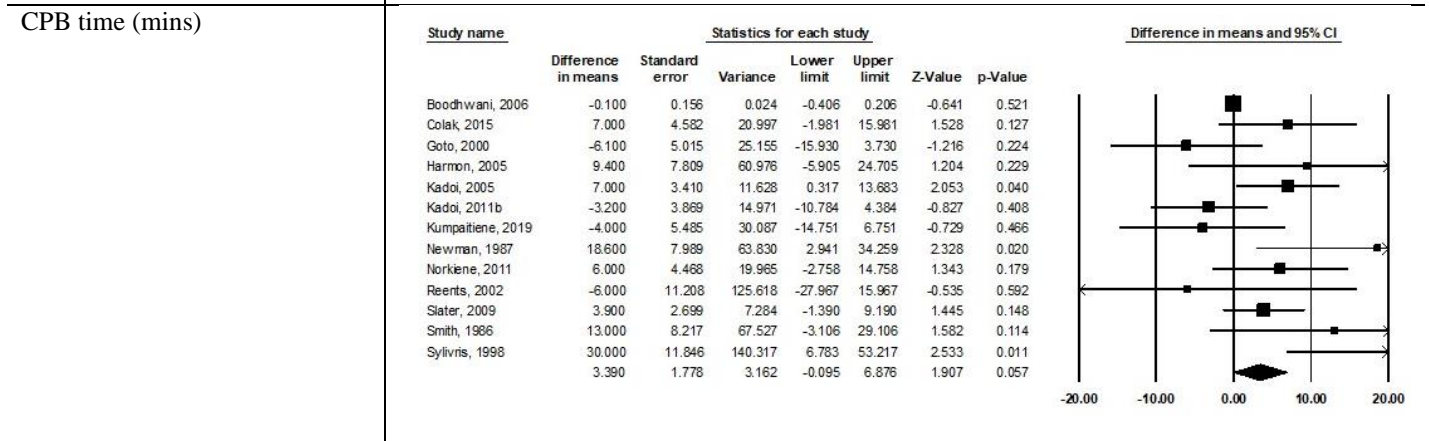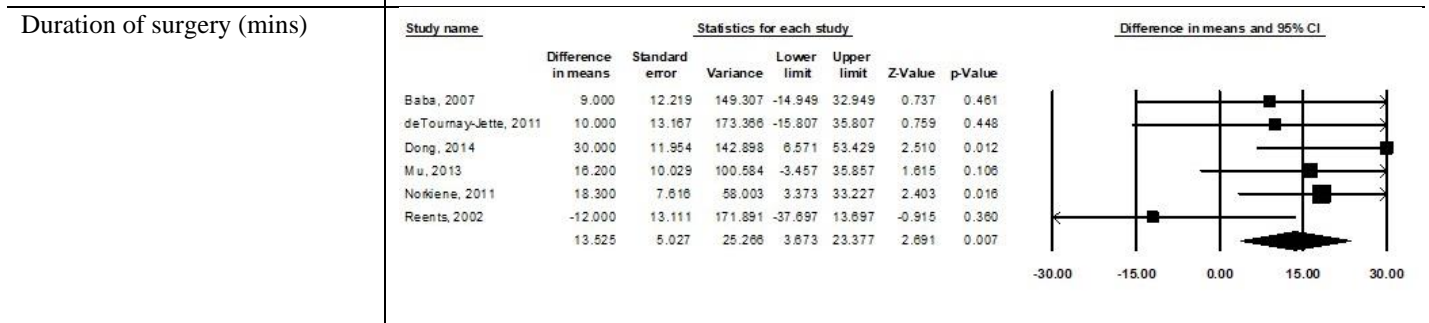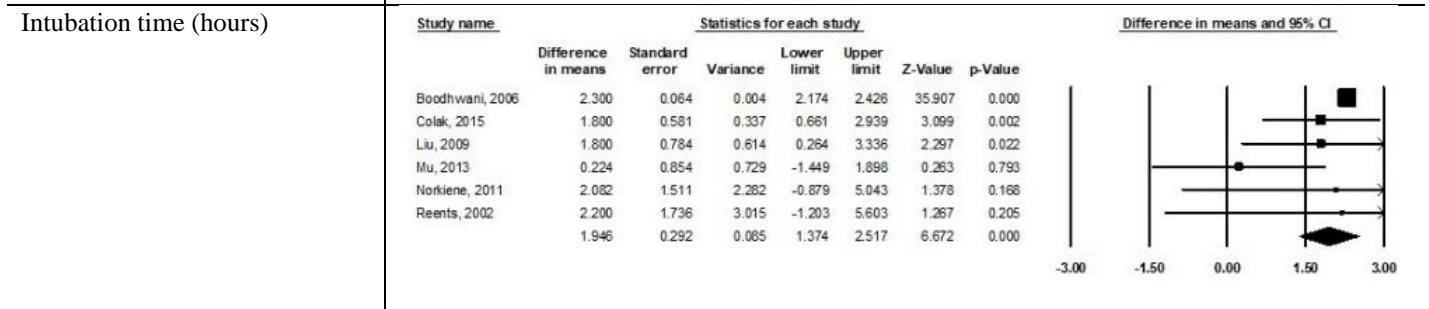

| Number of grafts | <u>Study name</u> | <u>Statistics for each study</u> |                |          |             |             |         | <u>Difference in means and 95% CI</u> |  |
|------------------|-------------------|----------------------------------|----------------|----------|-------------|-------------|---------|---------------------------------------|--|
|                  |                   | Difference in means              | Standard error | Variance | Lower limit | Upper limit | Z-Value | p-Value                               |  |
|                  |                   |                                  |                |          |             |             |         |                                       |  |
| Boodhwani, 2006  | 0.000             | 0.004                            | 0.000          | -0.008   | 0.008       | 0.000       | 1.000   |                                       |  |
| Colak, 2015      | 0.100             | 0.091                            | 0.008          | -0.078   | 0.278       | 1.100       | 0.271   |                                       |  |
| Dong, 2014       | 0.200             | 0.226                            | 0.051          | -0.243   | 0.643       | 0.884       | 0.377   |                                       |  |
| Harmon, 2005     | 0.200             | 0.433                            | 0.188          | -0.650   | 1.050       | 0.461       | 0.645   |                                       |  |
| Mu, 2013         | 0.200             | 0.165                            | 0.027          | -0.124   | 0.524       | 1.212       | 0.226   |                                       |  |
| Norkiene, 2011   | 0.300             | 0.196                            | 0.038          | -0.084   | 0.684       | 1.533       | 0.125   |                                       |  |
| Reents, 2002     | -0.200            | 0.289                            | 0.083          | -0.766   | 0.366       | -0.693      | 0.489   |                                       |  |
|                  | 0.025             | 0.030                            | 0.001          | -0.034   | 0.085       | 0.842       | 0.400   |                                       |  |

| Total Microemboli | <u>Study name</u> | <u>Statistics for each study</u> |                |          |             |             |         | <u>Std diff in means and 95% CI</u> |  |
|-------------------|-------------------|----------------------------------|----------------|----------|-------------|-------------|---------|-------------------------------------|--|
|                   |                   | Std diff in means                | Standard error | Variance | Lower limit | Upper limit | Z-Value | p-Value                             |  |
|                   |                   |                                  |                |          |             |             |         |                                     |  |
| Liu, 2009         | 0.236             | 0.134                            | 0.018          | -0.026   | 0.499       | 1.763       | 0.078   |                                     |  |
| Rodriguez, 2010   | -0.055            | 0.107                            | 0.011          | -0.264   | 0.154       | -0.512      | 0.608   |                                     |  |
| Royse, 2000       | 0.681             | 0.550                            | 0.302          | -0.397   | 1.758       | 1.238       | 0.216   |                                     |  |
| Stump, 1996       | 0.295             | 0.170                            | 0.029          | -0.038   | 0.627       | 1.736       | 0.082   |                                     |  |
|                   | 0.157             | 0.113                            | 0.013          | -0.066   | 0.379       | 1.381       | 0.167   |                                     |  |

**Post-Operative (Categorical)**

| Arrhythmia, incl. AF | <u>Study name</u> | <u>Statistics for each study</u> |             |             |         |         | <u>Odds ratio and 95% CI</u> |
|----------------------|-------------------|----------------------------------|-------------|-------------|---------|---------|------------------------------|
|                      |                   | Odds ratio                       | Lower limit | Upper limit | Z-Value | p-Value |                              |
|                      |                   |                                  |             |             |         |         |                              |
| Boodhwani, 2006      | 1.398             | 0.922                            | 2.122       | 1.576       | 0.115   |         |                              |
| Colak, 2015          | 1.176             | 0.591                            | 2.342       | 0.462       | 0.644   |         |                              |
| Mu, 2013             | 1.531             | 0.210                            | 11.147      | 0.421       | 0.674   |         |                              |
| Norkiene, 2011       | 3.265             | 0.966                            | 11.035      | 1.905       | 0.057   |         |                              |
| Restrepo, 2002       | 2.000             | 0.134                            | 29.808      | 0.503       | 0.615   |         |                              |
| Suksompong, 2002     | 0.870             | 0.220                            | 3.435       | -0.199      | 0.842   |         |                              |
|                      | 1.402             | 1.013                            | 1.941       | 2.038       | 0.042   |         |                              |

| Delirium       | <u>Study name</u> | <u>Statistics for each study</u> |             |             |         |         | <u>Odds ratio and 95% CI</u> |
|----------------|-------------------|----------------------------------|-------------|-------------|---------|---------|------------------------------|
|                |                   | Odds ratio                       | Lower limit | Upper limit | Z-Value | p-Value |                              |
|                |                   |                                  |             |             |         |         |                              |
| Colak, 2015    | 4.171             | 1.458                            | 11.935      | 2.662       | 0.008   |         |                              |
| Norkiene, 2011 | 9.019             | 1.076                            | 75.621      | 2.027       | 0.043   |         |                              |
| Reents, 2002   | 39.000            | 2.021                            | 752.636     | 2.426       | 0.015   |         |                              |
|                | 6.147             | 2.322                            | 16.269      | 3.657       | 0.000   |         |                              |

**Post-Operative (Continuous)**

| LOS in ICU (days)     | <u>Study name</u> | <u>Statistics for each study</u> |                |          |             |             |         | <u>Difference in means and 95% CI</u> |  |
|-----------------------|-------------------|----------------------------------|----------------|----------|-------------|-------------|---------|---------------------------------------|--|
|                       |                   | Difference in means              | Standard error | Variance | Lower limit | Upper limit | Z-Value | p-Value                               |  |
|                       |                   |                                  |                |          |             |             |         |                                       |  |
| Boodhwani, 2006       | 0.290             | 0.008                            | 0.000          | 0.274    | 0.306       | 36.220      | 0.000   |                                       |  |
| Colak, 2015           | 0.300             | 0.146                            | 0.021          | 0.015    | 0.585       | 2.060       | 0.039   |                                       |  |
| deTournay-Jette, 2011 | -0.710            | 0.479                            | 0.230          | -1.649   | 0.229       | -1.481      | 0.138   |                                       |  |
| Harmon, 2005          | 0.075             | 0.188                            | 0.036          | -0.294   | 0.444       | 0.398       | 0.691   |                                       |  |
| Mu, 2013              | -0.242            | 0.240                            | 0.058          | -0.712   | 0.228       | -1.010      | 0.312   |                                       |  |
| Norkiene, 2011        | 0.600             | 0.216                            | 0.047          | 0.176    | 1.024       | 2.774       | 0.006   |                                       |  |
| Sahan, 2018           | 1.200             | 0.240                            | 0.057          | 0.730    | 1.670       | 5.007       | 0.000   |                                       |  |
|                       | 0.294             | 0.132                            | 0.017          | 0.036    | 0.552       | 2.235       | 0.025   |                                       |  |

**Figure S4. Funnel plots for statistically significant analyses in regard to acute cognitive decline post-CABG, and results of publication bias/small-study effect investigation when more than 10 studies were available.**

|                                   |                                                                                    | Egger's Test |                       | Trim and Fill          |                 |       |
|-----------------------------------|------------------------------------------------------------------------------------|--------------|-----------------------|------------------------|-----------------|-------|
|                                   |                                                                                    | Intercept    | p value<br>(1-tailed) | No. imputed<br>studies | OR/MD†<br>/SMD‡ | 95%CI |
| <b>Preoperative (Categorical)</b> |                                                                                    |              |                       |                        |                 |       |
| Depression                        | Only 2 studies, could not produce funnel plot                                      |              |                       | -                      | -               | -     |
| Diabetes                          | 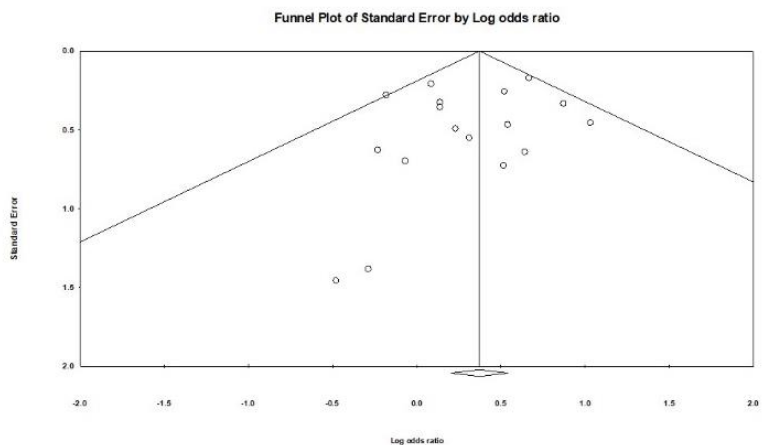 | -0.39        | .232                  | -                      | -               | -     |

Hypertension

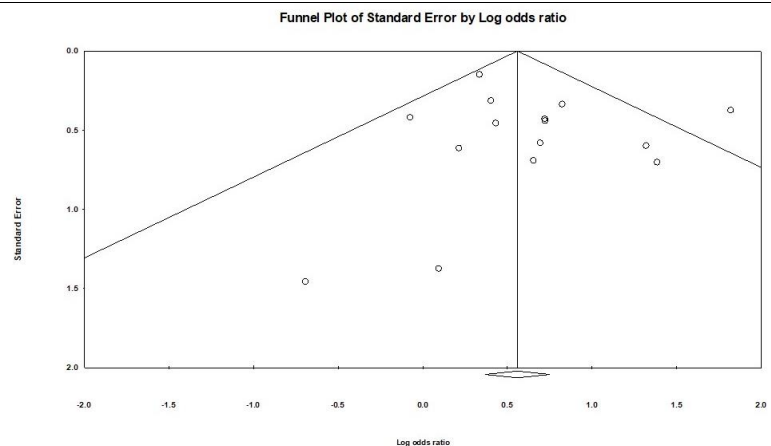

0.55

.197

-

-

-

Previous stroke, TIA, CVA

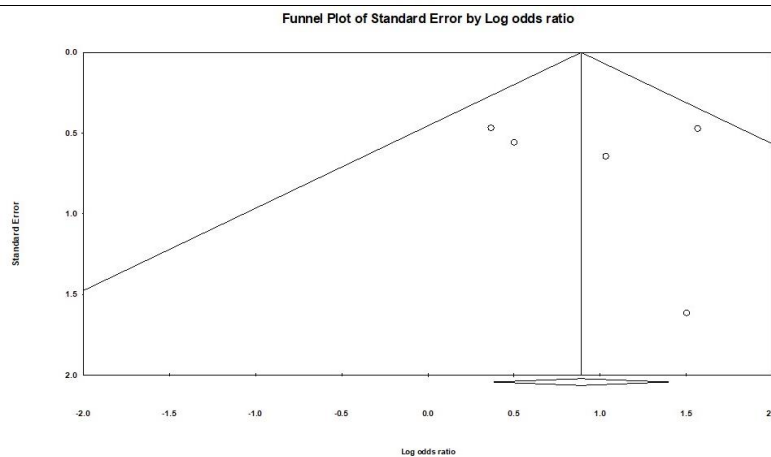

-

-

-

-

-

Preoperative (Continuous)

Age

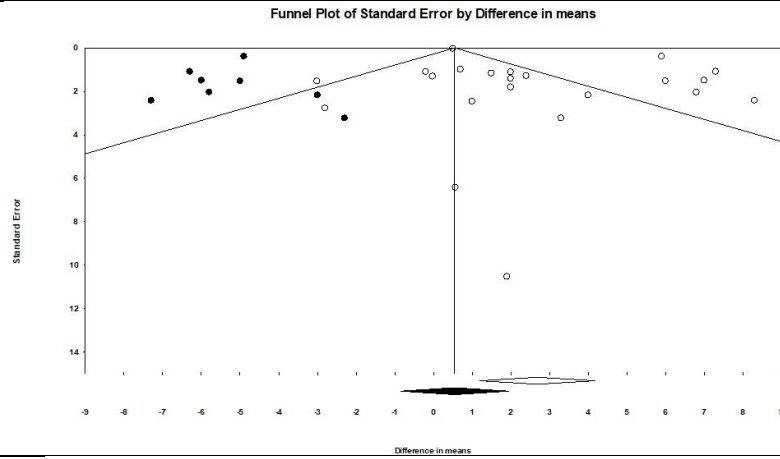

1.80

.015

8

0.55†

-0.86-1.95

BMI

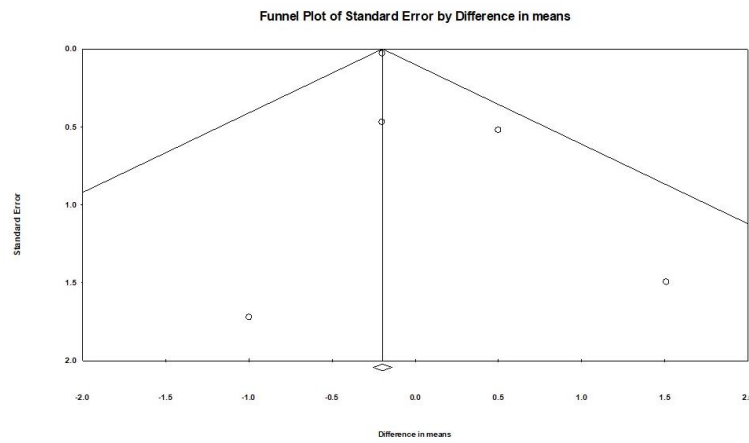

-

-

-

-

-

EuroSCORE

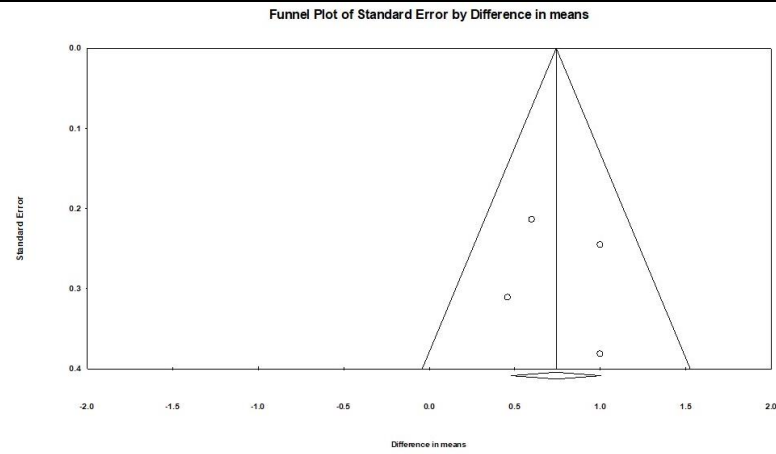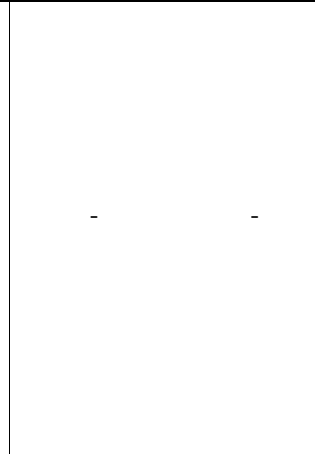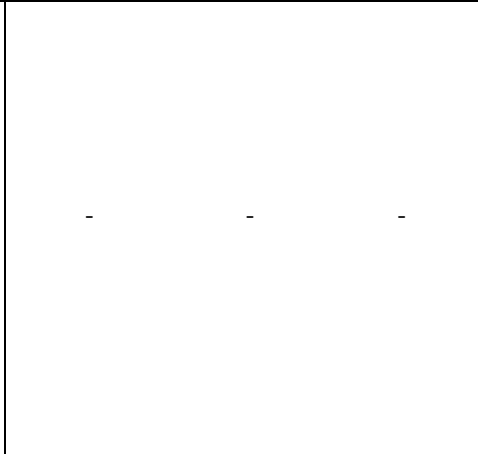

Intra-Operative (Continuous)

Duration of surgery (mins)

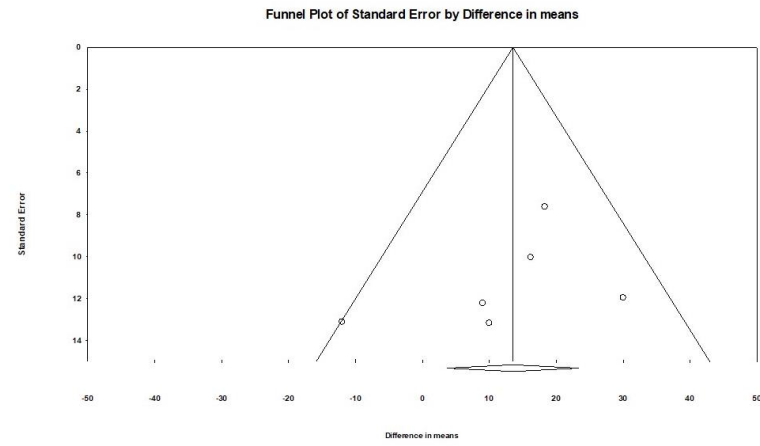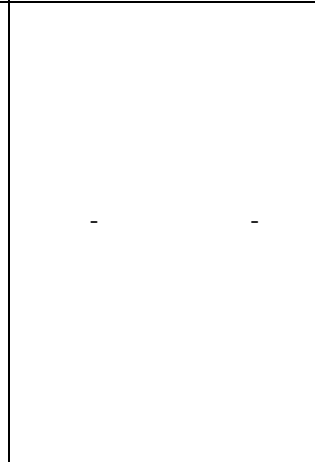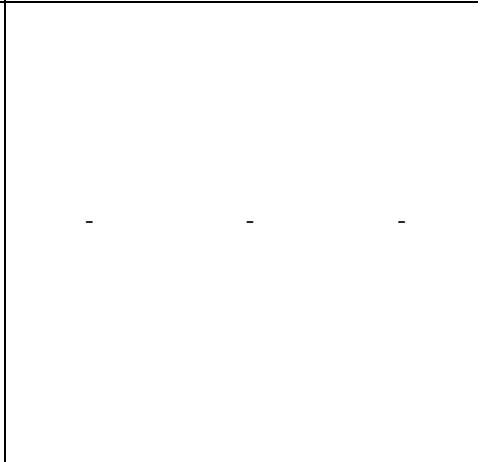

Intubation time (hours)

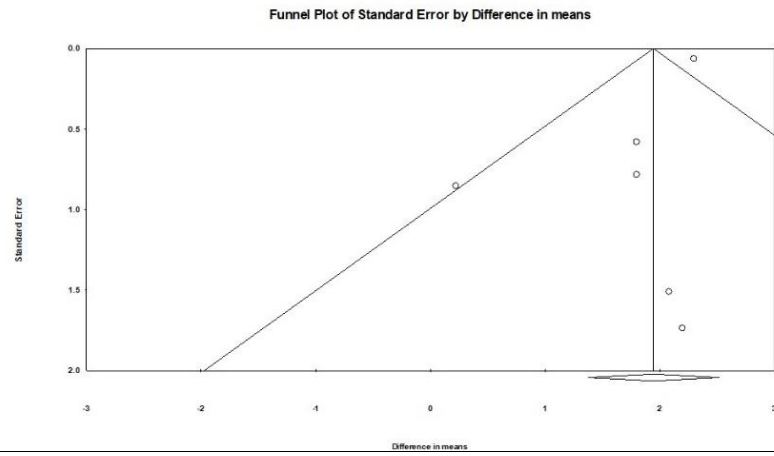

|   |   |
|---|---|
| - | - |
|---|---|

|   |   |   |
|---|---|---|
| - | - | - |
|---|---|---|

Post-Operative (Categorical)

Arrhythmia, incl. AF

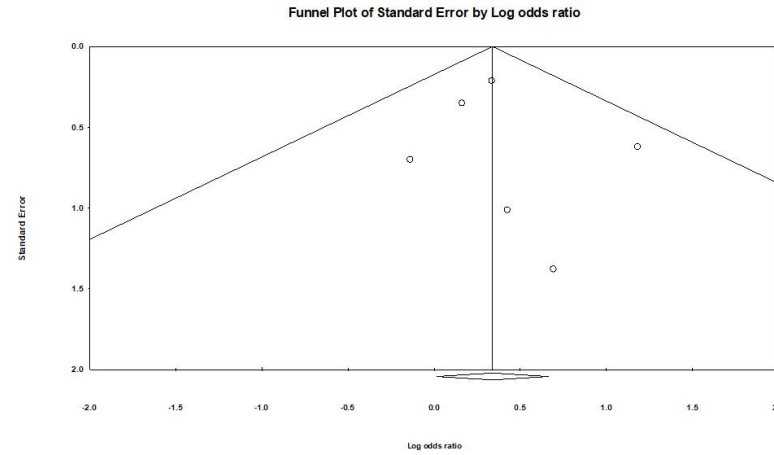

|   |   |
|---|---|
| - | - |
|---|---|

|   |   |   |
|---|---|---|
| - | - | - |
|---|---|---|

Delirium

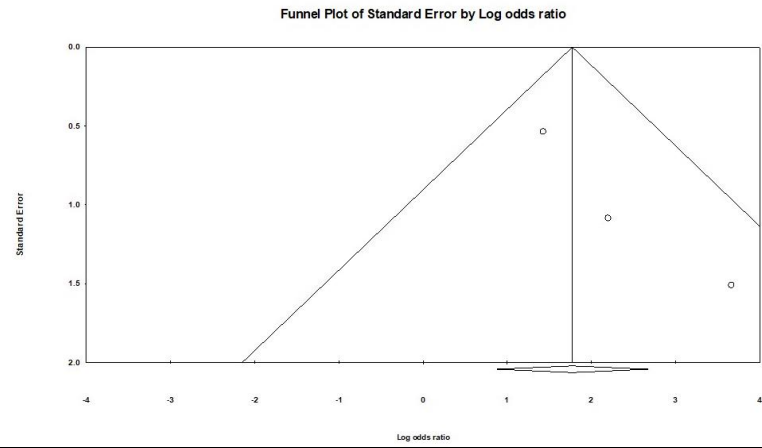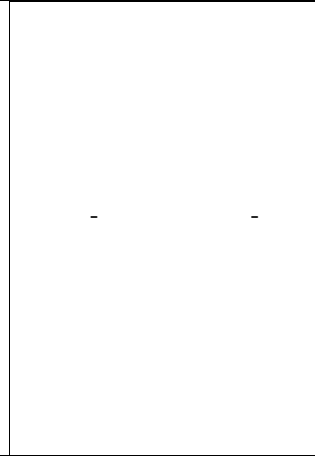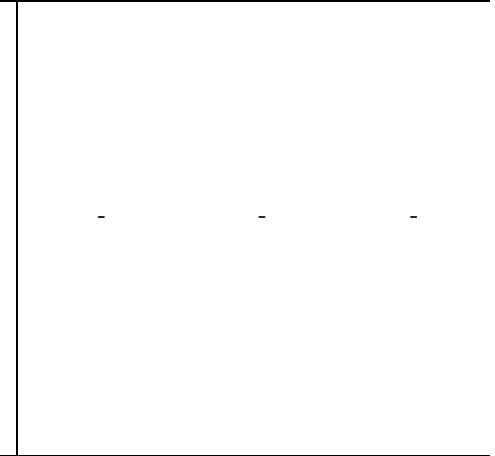

Post-Operative (Continuous)

LOS in ICU (days)

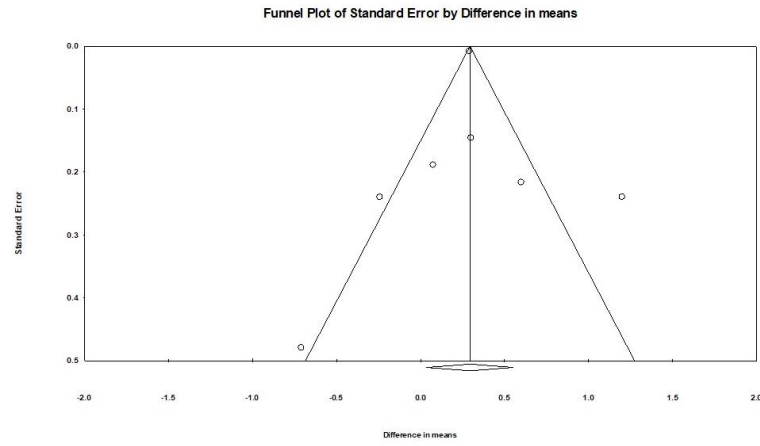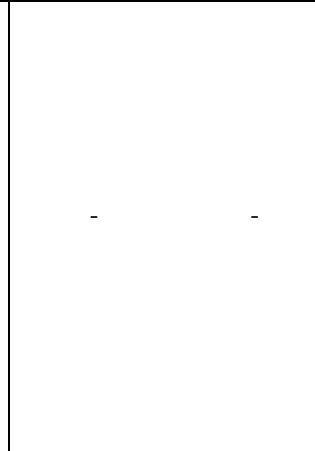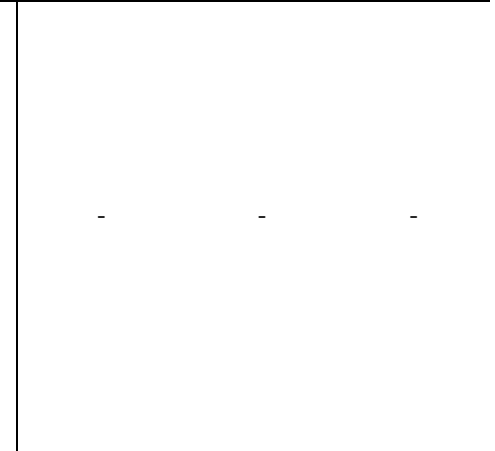



**Figure S5. Forest plots for mid-term cognitive decline post-CABG analyses.**

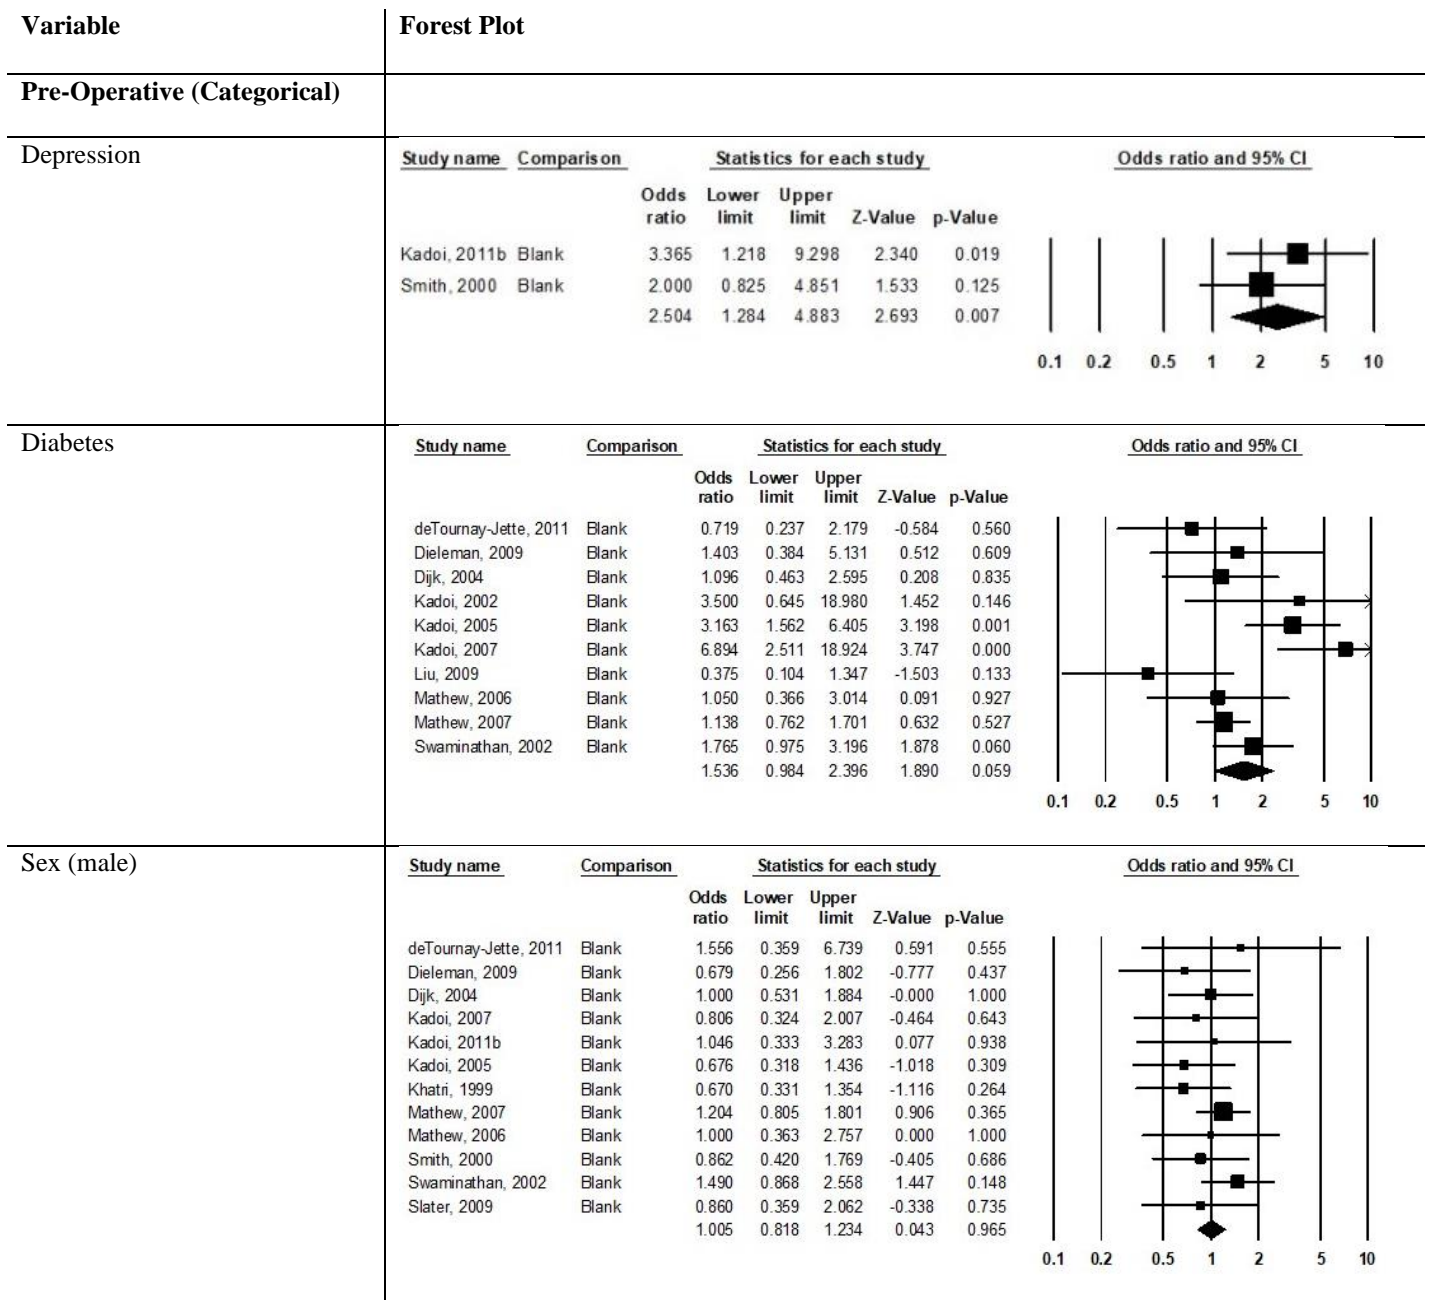

| Hypertension              | <table border="1"> <thead> <tr> <th rowspan="2">Study name</th> <th colspan="5">Statistics for each study</th> <th rowspan="2">Odds ratio and 95% CI</th> </tr> <tr> <th>Odds ratio</th> <th>Lower limit</th> <th>Upper limit</th> <th>Z-Value</th> <th>p-Value</th> </tr> </thead> <tbody> <tr><td>deTournay-Jette, 2011</td><td>1.016</td><td>0.341</td><td>3.026</td><td>0.028</td><td>0.978</td></tr> <tr><td>Dieleman, 2009</td><td>0.901</td><td>0.342</td><td>2.375</td><td>-0.211</td><td>0.833</td></tr> <tr><td>Kadoi, 2001</td><td>0.200</td><td>0.100</td><td>0.400</td><td>-4.551</td><td>0.000</td></tr> <tr><td>Kadoi, 2002</td><td>0.500</td><td>0.129</td><td>1.936</td><td>-1.003</td><td>0.316</td></tr> <tr><td>Kadoi, 2003</td><td>0.300</td><td>0.087</td><td>1.039</td><td>-1.899</td><td>0.058</td></tr> <tr><td>Kadoi, 2005</td><td>0.925</td><td>0.438</td><td>1.954</td><td>-0.205</td><td>0.837</td></tr> <tr><td>Kadoi, 2007</td><td>1.195</td><td>0.478</td><td>2.983</td><td>0.381</td><td>0.703</td></tr> <tr><td>Kadoi, 2011b</td><td>1.222</td><td>0.456</td><td>3.273</td><td>0.399</td><td>0.690</td></tr> <tr><td>Mathew, 2006</td><td>2.092</td><td>0.626</td><td>6.991</td><td>1.200</td><td>0.230</td></tr> <tr><td>Mathew, 2007</td><td>1.000</td><td>0.689</td><td>1.450</td><td>-0.000</td><td>1.000</td></tr> <tr><td>Smith, 2000</td><td>1.000</td><td>0.581</td><td>1.722</td><td>0.000</td><td>1.000</td></tr> <tr><td>Swaminathan, 2002</td><td>2.083</td><td>1.282</td><td>3.386</td><td>2.963</td><td>0.003</td></tr> <tr><td></td><td>0.887</td><td>0.594</td><td>1.324</td><td>-0.586</td><td>0.558</td></tr> </tbody> </table> | Study name  | Statistics for each study |                           |         |                       |  | Odds ratio and 95% CI | Odds ratio            | Lower limit           | Upper limit | Z-Value     | p-Value | deTournay-Jette, 2011 | 1.016      | 0.341 | 3.026 | 0.028  | 0.978 | Dieleman, 2009 | 0.901 | 0.342        | 2.375 | -0.211 | 0.833 | Kadoi, 2001 | 0.200  | 0.100 | 0.400 | -4.551 | 0.000 | Kadoi, 2002 | 0.500 | 0.129  | 1.936 | -1.003 | 0.316 | Kadoi, 2003 | 0.300 | 0.087 | 1.039 | -1.899 | 0.058 | Kadoi, 2005 | 0.925 | 0.438 | 1.954 | -0.205 | 0.837 | Kadoi, 2007 | 1.195 | 0.478 | 2.983 | 0.381 | 0.703 | Kadoi, 2011b | 1.222 | 0.456 | 3.273 | 0.399 | 0.690 | Mathew, 2006 | 2.092 | 0.626 | 6.991 | 1.200 | 0.230 | Mathew, 2007 | 1.000 | 0.689 | 1.450 | -0.000 | 1.000 | Smith, 2000 | 1.000 | 0.581 | 1.722 | 0.000 | 1.000 | Swaminathan, 2002 | 2.083 | 1.282 | 3.386 | 2.963 | 0.003 |  | 0.887 | 0.594 | 1.324 | -0.586 | 0.558 |  |
|---------------------------|-------------------------------------------------------------------------------------------------------------------------------------------------------------------------------------------------------------------------------------------------------------------------------------------------------------------------------------------------------------------------------------------------------------------------------------------------------------------------------------------------------------------------------------------------------------------------------------------------------------------------------------------------------------------------------------------------------------------------------------------------------------------------------------------------------------------------------------------------------------------------------------------------------------------------------------------------------------------------------------------------------------------------------------------------------------------------------------------------------------------------------------------------------------------------------------------------------------------------------------------------------------------------------------------------------------------------------------------------------------------------------------------------------------------------------------------------------------------------------------------------------------------------------------------------------------------------------------------------------------------------------------------------------------------------------------|-------------|---------------------------|---------------------------|---------|-----------------------|--|-----------------------|-----------------------|-----------------------|-------------|-------------|---------|-----------------------|------------|-------|-------|--------|-------|----------------|-------|--------------|-------|--------|-------|-------------|--------|-------|-------|--------|-------|-------------|-------|--------|-------|--------|-------|-------------|-------|-------|-------|--------|-------|-------------|-------|-------|-------|--------|-------|-------------|-------|-------|-------|-------|-------|--------------|-------|-------|-------|-------|-------|--------------|-------|-------|-------|-------|-------|--------------|-------|-------|-------|--------|-------|-------------|-------|-------|-------|-------|-------|-------------------|-------|-------|-------|-------|-------|--|-------|-------|-------|--------|-------|--|
| Study name                | Statistics for each study                                                                                                                                                                                                                                                                                                                                                                                                                                                                                                                                                                                                                                                                                                                                                                                                                                                                                                                                                                                                                                                                                                                                                                                                                                                                                                                                                                                                                                                                                                                                                                                                                                                           |             |                           |                           |         | Odds ratio and 95% CI |  |                       |                       |                       |             |             |         |                       |            |       |       |        |       |                |       |              |       |        |       |             |        |       |       |        |       |             |       |        |       |        |       |             |       |       |       |        |       |             |       |       |       |        |       |             |       |       |       |       |       |              |       |       |       |       |       |              |       |       |       |       |       |              |       |       |       |        |       |             |       |       |       |       |       |                   |       |       |       |       |       |  |       |       |       |        |       |  |
|                           | Odds ratio                                                                                                                                                                                                                                                                                                                                                                                                                                                                                                                                                                                                                                                                                                                                                                                                                                                                                                                                                                                                                                                                                                                                                                                                                                                                                                                                                                                                                                                                                                                                                                                                                                                                          | Lower limit | Upper limit               | Z-Value                   | p-Value |                       |  |                       |                       |                       |             |             |         |                       |            |       |       |        |       |                |       |              |       |        |       |             |        |       |       |        |       |             |       |        |       |        |       |             |       |       |       |        |       |             |       |       |       |        |       |             |       |       |       |       |       |              |       |       |       |       |       |              |       |       |       |       |       |              |       |       |       |        |       |             |       |       |       |       |       |                   |       |       |       |       |       |  |       |       |       |        |       |  |
| deTournay-Jette, 2011     | 1.016                                                                                                                                                                                                                                                                                                                                                                                                                                                                                                                                                                                                                                                                                                                                                                                                                                                                                                                                                                                                                                                                                                                                                                                                                                                                                                                                                                                                                                                                                                                                                                                                                                                                               | 0.341       | 3.026                     | 0.028                     | 0.978   |                       |  |                       |                       |                       |             |             |         |                       |            |       |       |        |       |                |       |              |       |        |       |             |        |       |       |        |       |             |       |        |       |        |       |             |       |       |       |        |       |             |       |       |       |        |       |             |       |       |       |       |       |              |       |       |       |       |       |              |       |       |       |       |       |              |       |       |       |        |       |             |       |       |       |       |       |                   |       |       |       |       |       |  |       |       |       |        |       |  |
| Dieleman, 2009            | 0.901                                                                                                                                                                                                                                                                                                                                                                                                                                                                                                                                                                                                                                                                                                                                                                                                                                                                                                                                                                                                                                                                                                                                                                                                                                                                                                                                                                                                                                                                                                                                                                                                                                                                               | 0.342       | 2.375                     | -0.211                    | 0.833   |                       |  |                       |                       |                       |             |             |         |                       |            |       |       |        |       |                |       |              |       |        |       |             |        |       |       |        |       |             |       |        |       |        |       |             |       |       |       |        |       |             |       |       |       |        |       |             |       |       |       |       |       |              |       |       |       |       |       |              |       |       |       |       |       |              |       |       |       |        |       |             |       |       |       |       |       |                   |       |       |       |       |       |  |       |       |       |        |       |  |
| Kadoi, 2001               | 0.200                                                                                                                                                                                                                                                                                                                                                                                                                                                                                                                                                                                                                                                                                                                                                                                                                                                                                                                                                                                                                                                                                                                                                                                                                                                                                                                                                                                                                                                                                                                                                                                                                                                                               | 0.100       | 0.400                     | -4.551                    | 0.000   |                       |  |                       |                       |                       |             |             |         |                       |            |       |       |        |       |                |       |              |       |        |       |             |        |       |       |        |       |             |       |        |       |        |       |             |       |       |       |        |       |             |       |       |       |        |       |             |       |       |       |       |       |              |       |       |       |       |       |              |       |       |       |       |       |              |       |       |       |        |       |             |       |       |       |       |       |                   |       |       |       |       |       |  |       |       |       |        |       |  |
| Kadoi, 2002               | 0.500                                                                                                                                                                                                                                                                                                                                                                                                                                                                                                                                                                                                                                                                                                                                                                                                                                                                                                                                                                                                                                                                                                                                                                                                                                                                                                                                                                                                                                                                                                                                                                                                                                                                               | 0.129       | 1.936                     | -1.003                    | 0.316   |                       |  |                       |                       |                       |             |             |         |                       |            |       |       |        |       |                |       |              |       |        |       |             |        |       |       |        |       |             |       |        |       |        |       |             |       |       |       |        |       |             |       |       |       |        |       |             |       |       |       |       |       |              |       |       |       |       |       |              |       |       |       |       |       |              |       |       |       |        |       |             |       |       |       |       |       |                   |       |       |       |       |       |  |       |       |       |        |       |  |
| Kadoi, 2003               | 0.300                                                                                                                                                                                                                                                                                                                                                                                                                                                                                                                                                                                                                                                                                                                                                                                                                                                                                                                                                                                                                                                                                                                                                                                                                                                                                                                                                                                                                                                                                                                                                                                                                                                                               | 0.087       | 1.039                     | -1.899                    | 0.058   |                       |  |                       |                       |                       |             |             |         |                       |            |       |       |        |       |                |       |              |       |        |       |             |        |       |       |        |       |             |       |        |       |        |       |             |       |       |       |        |       |             |       |       |       |        |       |             |       |       |       |       |       |              |       |       |       |       |       |              |       |       |       |       |       |              |       |       |       |        |       |             |       |       |       |       |       |                   |       |       |       |       |       |  |       |       |       |        |       |  |
| Kadoi, 2005               | 0.925                                                                                                                                                                                                                                                                                                                                                                                                                                                                                                                                                                                                                                                                                                                                                                                                                                                                                                                                                                                                                                                                                                                                                                                                                                                                                                                                                                                                                                                                                                                                                                                                                                                                               | 0.438       | 1.954                     | -0.205                    | 0.837   |                       |  |                       |                       |                       |             |             |         |                       |            |       |       |        |       |                |       |              |       |        |       |             |        |       |       |        |       |             |       |        |       |        |       |             |       |       |       |        |       |             |       |       |       |        |       |             |       |       |       |       |       |              |       |       |       |       |       |              |       |       |       |       |       |              |       |       |       |        |       |             |       |       |       |       |       |                   |       |       |       |       |       |  |       |       |       |        |       |  |
| Kadoi, 2007               | 1.195                                                                                                                                                                                                                                                                                                                                                                                                                                                                                                                                                                                                                                                                                                                                                                                                                                                                                                                                                                                                                                                                                                                                                                                                                                                                                                                                                                                                                                                                                                                                                                                                                                                                               | 0.478       | 2.983                     | 0.381                     | 0.703   |                       |  |                       |                       |                       |             |             |         |                       |            |       |       |        |       |                |       |              |       |        |       |             |        |       |       |        |       |             |       |        |       |        |       |             |       |       |       |        |       |             |       |       |       |        |       |             |       |       |       |       |       |              |       |       |       |       |       |              |       |       |       |       |       |              |       |       |       |        |       |             |       |       |       |       |       |                   |       |       |       |       |       |  |       |       |       |        |       |  |
| Kadoi, 2011b              | 1.222                                                                                                                                                                                                                                                                                                                                                                                                                                                                                                                                                                                                                                                                                                                                                                                                                                                                                                                                                                                                                                                                                                                                                                                                                                                                                                                                                                                                                                                                                                                                                                                                                                                                               | 0.456       | 3.273                     | 0.399                     | 0.690   |                       |  |                       |                       |                       |             |             |         |                       |            |       |       |        |       |                |       |              |       |        |       |             |        |       |       |        |       |             |       |        |       |        |       |             |       |       |       |        |       |             |       |       |       |        |       |             |       |       |       |       |       |              |       |       |       |       |       |              |       |       |       |       |       |              |       |       |       |        |       |             |       |       |       |       |       |                   |       |       |       |       |       |  |       |       |       |        |       |  |
| Mathew, 2006              | 2.092                                                                                                                                                                                                                                                                                                                                                                                                                                                                                                                                                                                                                                                                                                                                                                                                                                                                                                                                                                                                                                                                                                                                                                                                                                                                                                                                                                                                                                                                                                                                                                                                                                                                               | 0.626       | 6.991                     | 1.200                     | 0.230   |                       |  |                       |                       |                       |             |             |         |                       |            |       |       |        |       |                |       |              |       |        |       |             |        |       |       |        |       |             |       |        |       |        |       |             |       |       |       |        |       |             |       |       |       |        |       |             |       |       |       |       |       |              |       |       |       |       |       |              |       |       |       |       |       |              |       |       |       |        |       |             |       |       |       |       |       |                   |       |       |       |       |       |  |       |       |       |        |       |  |
| Mathew, 2007              | 1.000                                                                                                                                                                                                                                                                                                                                                                                                                                                                                                                                                                                                                                                                                                                                                                                                                                                                                                                                                                                                                                                                                                                                                                                                                                                                                                                                                                                                                                                                                                                                                                                                                                                                               | 0.689       | 1.450                     | -0.000                    | 1.000   |                       |  |                       |                       |                       |             |             |         |                       |            |       |       |        |       |                |       |              |       |        |       |             |        |       |       |        |       |             |       |        |       |        |       |             |       |       |       |        |       |             |       |       |       |        |       |             |       |       |       |       |       |              |       |       |       |       |       |              |       |       |       |       |       |              |       |       |       |        |       |             |       |       |       |       |       |                   |       |       |       |       |       |  |       |       |       |        |       |  |
| Smith, 2000               | 1.000                                                                                                                                                                                                                                                                                                                                                                                                                                                                                                                                                                                                                                                                                                                                                                                                                                                                                                                                                                                                                                                                                                                                                                                                                                                                                                                                                                                                                                                                                                                                                                                                                                                                               | 0.581       | 1.722                     | 0.000                     | 1.000   |                       |  |                       |                       |                       |             |             |         |                       |            |       |       |        |       |                |       |              |       |        |       |             |        |       |       |        |       |             |       |        |       |        |       |             |       |       |       |        |       |             |       |       |       |        |       |             |       |       |       |       |       |              |       |       |       |       |       |              |       |       |       |       |       |              |       |       |       |        |       |             |       |       |       |       |       |                   |       |       |       |       |       |  |       |       |       |        |       |  |
| Swaminathan, 2002         | 2.083                                                                                                                                                                                                                                                                                                                                                                                                                                                                                                                                                                                                                                                                                                                                                                                                                                                                                                                                                                                                                                                                                                                                                                                                                                                                                                                                                                                                                                                                                                                                                                                                                                                                               | 1.282       | 3.386                     | 2.963                     | 0.003   |                       |  |                       |                       |                       |             |             |         |                       |            |       |       |        |       |                |       |              |       |        |       |             |        |       |       |        |       |             |       |        |       |        |       |             |       |       |       |        |       |             |       |       |       |        |       |             |       |       |       |       |       |              |       |       |       |       |       |              |       |       |       |       |       |              |       |       |       |        |       |             |       |       |       |       |       |                   |       |       |       |       |       |  |       |       |       |        |       |  |
|                           | 0.887                                                                                                                                                                                                                                                                                                                                                                                                                                                                                                                                                                                                                                                                                                                                                                                                                                                                                                                                                                                                                                                                                                                                                                                                                                                                                                                                                                                                                                                                                                                                                                                                                                                                               | 0.594       | 1.324                     | -0.586                    | 0.558   |                       |  |                       |                       |                       |             |             |         |                       |            |       |       |        |       |                |       |              |       |        |       |             |        |       |       |        |       |             |       |        |       |        |       |             |       |       |       |        |       |             |       |       |       |        |       |             |       |       |       |       |       |              |       |       |       |       |       |              |       |       |       |       |       |              |       |       |       |        |       |             |       |       |       |       |       |                   |       |       |       |       |       |  |       |       |       |        |       |  |
| Previous MI history/ever  | <table border="1"> <thead> <tr> <th rowspan="2">Study name</th> <th colspan="5">Statistics for each study</th> <th rowspan="2">Odds ratio and 95% CI</th> </tr> <tr> <th>Odds ratio</th> <th>Lower limit</th> <th>Upper limit</th> <th>Z-Value</th> <th>p-Value</th> </tr> </thead> <tbody> <tr><td>Mathew, 2006</td><td>0.643</td><td>0.246</td><td>1.676</td><td>-0.904</td><td>0.366</td></tr> <tr><td>Mathew, 2007</td><td>0.721</td><td>0.471</td><td>1.103</td><td>-1.509</td><td>0.131</td></tr> <tr><td>Smith, 2000</td><td>1.310</td><td>0.770</td><td>2.229</td><td>0.995</td><td>0.320</td></tr> <tr><td></td><td>0.883</td><td>0.568</td><td>1.373</td><td>-0.553</td><td>0.580</td></tr> </tbody> </table>                                                                                                                                                                                                                                                                                                                                                                                                                                                                                                                                                                                                                                                                                                                                                                                                                                                                                                                                                             | Study name  | Statistics for each study |                           |         |                       |  | Odds ratio and 95% CI | Odds ratio            | Lower limit           | Upper limit | Z-Value     | p-Value | Mathew, 2006          | 0.643      | 0.246 | 1.676 | -0.904 | 0.366 | Mathew, 2007   | 0.721 | 0.471        | 1.103 | -1.509 | 0.131 | Smith, 2000 | 1.310  | 0.770 | 2.229 | 0.995  | 0.320 |             | 0.883 | 0.568  | 1.373 | -0.553 | 0.580 |             |       |       |       |        |       |             |       |       |       |        |       |             |       |       |       |       |       |              |       |       |       |       |       |              |       |       |       |       |       |              |       |       |       |        |       |             |       |       |       |       |       |                   |       |       |       |       |       |  |       |       |       |        |       |  |
| Study name                | Statistics for each study                                                                                                                                                                                                                                                                                                                                                                                                                                                                                                                                                                                                                                                                                                                                                                                                                                                                                                                                                                                                                                                                                                                                                                                                                                                                                                                                                                                                                                                                                                                                                                                                                                                           |             |                           |                           |         | Odds ratio and 95% CI |  |                       |                       |                       |             |             |         |                       |            |       |       |        |       |                |       |              |       |        |       |             |        |       |       |        |       |             |       |        |       |        |       |             |       |       |       |        |       |             |       |       |       |        |       |             |       |       |       |       |       |              |       |       |       |       |       |              |       |       |       |       |       |              |       |       |       |        |       |             |       |       |       |       |       |                   |       |       |       |       |       |  |       |       |       |        |       |  |
|                           | Odds ratio                                                                                                                                                                                                                                                                                                                                                                                                                                                                                                                                                                                                                                                                                                                                                                                                                                                                                                                                                                                                                                                                                                                                                                                                                                                                                                                                                                                                                                                                                                                                                                                                                                                                          | Lower limit | Upper limit               | Z-Value                   | p-Value |                       |  |                       |                       |                       |             |             |         |                       |            |       |       |        |       |                |       |              |       |        |       |             |        |       |       |        |       |             |       |        |       |        |       |             |       |       |       |        |       |             |       |       |       |        |       |             |       |       |       |       |       |              |       |       |       |       |       |              |       |       |       |       |       |              |       |       |       |        |       |             |       |       |       |       |       |                   |       |       |       |       |       |  |       |       |       |        |       |  |
| Mathew, 2006              | 0.643                                                                                                                                                                                                                                                                                                                                                                                                                                                                                                                                                                                                                                                                                                                                                                                                                                                                                                                                                                                                                                                                                                                                                                                                                                                                                                                                                                                                                                                                                                                                                                                                                                                                               | 0.246       | 1.676                     | -0.904                    | 0.366   |                       |  |                       |                       |                       |             |             |         |                       |            |       |       |        |       |                |       |              |       |        |       |             |        |       |       |        |       |             |       |        |       |        |       |             |       |       |       |        |       |             |       |       |       |        |       |             |       |       |       |       |       |              |       |       |       |       |       |              |       |       |       |       |       |              |       |       |       |        |       |             |       |       |       |       |       |                   |       |       |       |       |       |  |       |       |       |        |       |  |
| Mathew, 2007              | 0.721                                                                                                                                                                                                                                                                                                                                                                                                                                                                                                                                                                                                                                                                                                                                                                                                                                                                                                                                                                                                                                                                                                                                                                                                                                                                                                                                                                                                                                                                                                                                                                                                                                                                               | 0.471       | 1.103                     | -1.509                    | 0.131   |                       |  |                       |                       |                       |             |             |         |                       |            |       |       |        |       |                |       |              |       |        |       |             |        |       |       |        |       |             |       |        |       |        |       |             |       |       |       |        |       |             |       |       |       |        |       |             |       |       |       |       |       |              |       |       |       |       |       |              |       |       |       |       |       |              |       |       |       |        |       |             |       |       |       |       |       |                   |       |       |       |       |       |  |       |       |       |        |       |  |
| Smith, 2000               | 1.310                                                                                                                                                                                                                                                                                                                                                                                                                                                                                                                                                                                                                                                                                                                                                                                                                                                                                                                                                                                                                                                                                                                                                                                                                                                                                                                                                                                                                                                                                                                                                                                                                                                                               | 0.770       | 2.229                     | 0.995                     | 0.320   |                       |  |                       |                       |                       |             |             |         |                       |            |       |       |        |       |                |       |              |       |        |       |             |        |       |       |        |       |             |       |        |       |        |       |             |       |       |       |        |       |             |       |       |       |        |       |             |       |       |       |       |       |              |       |       |       |       |       |              |       |       |       |       |       |              |       |       |       |        |       |             |       |       |       |       |       |                   |       |       |       |       |       |  |       |       |       |        |       |  |
|                           | 0.883                                                                                                                                                                                                                                                                                                                                                                                                                                                                                                                                                                                                                                                                                                                                                                                                                                                                                                                                                                                                                                                                                                                                                                                                                                                                                                                                                                                                                                                                                                                                                                                                                                                                               | 0.568       | 1.373                     | -0.553                    | 0.580   |                       |  |                       |                       |                       |             |             |         |                       |            |       |       |        |       |                |       |              |       |        |       |             |        |       |       |        |       |             |       |        |       |        |       |             |       |       |       |        |       |             |       |       |       |        |       |             |       |       |       |       |       |              |       |       |       |       |       |              |       |       |       |       |       |              |       |       |       |        |       |             |       |       |       |       |       |                   |       |       |       |       |       |  |       |       |       |        |       |  |
| Previous stroke, TIA, CVA | <table border="1"> <thead> <tr> <th rowspan="2">Study name</th> <th rowspan="2">Comparison</th> <th colspan="5">Statistics for each study</th> <th rowspan="2">Odds ratio and 95% CI</th> </tr> <tr> <th>Odds ratio</th> <th>Lower limit</th> <th>Upper limit</th> <th>Z-Value</th> <th>p-Value</th> </tr> </thead> <tbody> <tr><td>Dijk, 2004</td><td>Blank</td><td>0.742</td><td>0.145</td><td>3.800</td><td>-0.358</td><td>0.721</td></tr> <tr><td>Mathew, 2007</td><td>Blank</td><td>0.922</td><td>0.180</td><td>4.737</td><td>-0.097</td><td>0.923</td></tr> <tr><td></td><td></td><td>0.827</td><td>0.260</td><td>2.628</td><td>-0.322</td><td>0.748</td></tr> </tbody> </table>                                                                                                                                                                                                                                                                                                                                                                                                                                                                                                                                                                                                                                                                                                                                                                                                                                                                                                                                                                                              | Study name  | Comparison                | Statistics for each study |         |                       |  |                       | Odds ratio and 95% CI | Odds ratio            | Lower limit | Upper limit | Z-Value | p-Value               | Dijk, 2004 | Blank | 0.742 | 0.145  | 3.800 | -0.358         | 0.721 | Mathew, 2007 | Blank | 0.922  | 0.180 | 4.737       | -0.097 | 0.923 |       |        | 0.827 | 0.260       | 2.628 | -0.322 | 0.748 |        |       |             |       |       |       |        |       |             |       |       |       |        |       |             |       |       |       |       |       |              |       |       |       |       |       |              |       |       |       |       |       |              |       |       |       |        |       |             |       |       |       |       |       |                   |       |       |       |       |       |  |       |       |       |        |       |  |
| Study name                | Comparison                                                                                                                                                                                                                                                                                                                                                                                                                                                                                                                                                                                                                                                                                                                                                                                                                                                                                                                                                                                                                                                                                                                                                                                                                                                                                                                                                                                                                                                                                                                                                                                                                                                                          |             |                           | Statistics for each study |         |                       |  |                       |                       | Odds ratio and 95% CI |             |             |         |                       |            |       |       |        |       |                |       |              |       |        |       |             |        |       |       |        |       |             |       |        |       |        |       |             |       |       |       |        |       |             |       |       |       |        |       |             |       |       |       |       |       |              |       |       |       |       |       |              |       |       |       |       |       |              |       |       |       |        |       |             |       |       |       |       |       |                   |       |       |       |       |       |  |       |       |       |        |       |  |
|                           |                                                                                                                                                                                                                                                                                                                                                                                                                                                                                                                                                                                                                                                                                                                                                                                                                                                                                                                                                                                                                                                                                                                                                                                                                                                                                                                                                                                                                                                                                                                                                                                                                                                                                     | Odds ratio  | Lower limit               | Upper limit               | Z-Value | p-Value               |  |                       |                       |                       |             |             |         |                       |            |       |       |        |       |                |       |              |       |        |       |             |        |       |       |        |       |             |       |        |       |        |       |             |       |       |       |        |       |             |       |       |       |        |       |             |       |       |       |       |       |              |       |       |       |       |       |              |       |       |       |       |       |              |       |       |       |        |       |             |       |       |       |       |       |                   |       |       |       |       |       |  |       |       |       |        |       |  |
| Dijk, 2004                | Blank                                                                                                                                                                                                                                                                                                                                                                                                                                                                                                                                                                                                                                                                                                                                                                                                                                                                                                                                                                                                                                                                                                                                                                                                                                                                                                                                                                                                                                                                                                                                                                                                                                                                               | 0.742       | 0.145                     | 3.800                     | -0.358  | 0.721                 |  |                       |                       |                       |             |             |         |                       |            |       |       |        |       |                |       |              |       |        |       |             |        |       |       |        |       |             |       |        |       |        |       |             |       |       |       |        |       |             |       |       |       |        |       |             |       |       |       |       |       |              |       |       |       |       |       |              |       |       |       |       |       |              |       |       |       |        |       |             |       |       |       |       |       |                   |       |       |       |       |       |  |       |       |       |        |       |  |
| Mathew, 2007              | Blank                                                                                                                                                                                                                                                                                                                                                                                                                                                                                                                                                                                                                                                                                                                                                                                                                                                                                                                                                                                                                                                                                                                                                                                                                                                                                                                                                                                                                                                                                                                                                                                                                                                                               | 0.922       | 0.180                     | 4.737                     | -0.097  | 0.923                 |  |                       |                       |                       |             |             |         |                       |            |       |       |        |       |                |       |              |       |        |       |             |        |       |       |        |       |             |       |        |       |        |       |             |       |       |       |        |       |             |       |       |       |        |       |             |       |       |       |       |       |              |       |       |       |       |       |              |       |       |       |       |       |              |       |       |       |        |       |             |       |       |       |       |       |                   |       |       |       |       |       |  |       |       |       |        |       |  |
|                           |                                                                                                                                                                                                                                                                                                                                                                                                                                                                                                                                                                                                                                                                                                                                                                                                                                                                                                                                                                                                                                                                                                                                                                                                                                                                                                                                                                                                                                                                                                                                                                                                                                                                                     | 0.827       | 0.260                     | 2.628                     | -0.322  | 0.748                 |  |                       |                       |                       |             |             |         |                       |            |       |       |        |       |                |       |              |       |        |       |             |        |       |       |        |       |             |       |        |       |        |       |             |       |       |       |        |       |             |       |       |       |        |       |             |       |       |       |       |       |              |       |       |       |       |       |              |       |       |       |       |       |              |       |       |       |        |       |             |       |       |       |       |       |                   |       |       |       |       |       |  |       |       |       |        |       |  |
| PVD                       | <table border="1"> <thead> <tr> <th rowspan="2">Study name</th> <th rowspan="2">Comparison</th> <th colspan="5">Statistics for each study</th> <th rowspan="2">Odds ratio and 95% CI</th> </tr> <tr> <th>Odds ratio</th> <th>Lower limit</th> <th>Upper limit</th> <th>Z-Value</th> <th>p-Value</th> </tr> </thead> <tbody> <tr><td>Dijk, 2004</td><td>Blank</td><td>1.000</td><td>0.347</td><td>2.885</td><td>0.000</td><td>1.000</td></tr> <tr><td>Mathew, 2007</td><td>Blank</td><td>0.628</td><td>0.337</td><td>1.173</td><td>-1.458</td><td>0.145</td></tr> <tr><td></td><td></td><td>0.708</td><td>0.414</td><td>1.213</td><td>-1.256</td><td>0.209</td></tr> </tbody> </table>                                                                                                                                                                                                                                                                                                                                                                                                                                                                                                                                                                                                                                                                                                                                                                                                                                                                                                                                                                                               | Study name  | Comparison                | Statistics for each study |         |                       |  |                       | Odds ratio and 95% CI | Odds ratio            | Lower limit | Upper limit | Z-Value | p-Value               | Dijk, 2004 | Blank | 1.000 | 0.347  | 2.885 | 0.000          | 1.000 | Mathew, 2007 | Blank | 0.628  | 0.337 | 1.173       | -1.458 | 0.145 |       |        | 0.708 | 0.414       | 1.213 | -1.256 | 0.209 |        |       |             |       |       |       |        |       |             |       |       |       |        |       |             |       |       |       |       |       |              |       |       |       |       |       |              |       |       |       |       |       |              |       |       |       |        |       |             |       |       |       |       |       |                   |       |       |       |       |       |  |       |       |       |        |       |  |
| Study name                | Comparison                                                                                                                                                                                                                                                                                                                                                                                                                                                                                                                                                                                                                                                                                                                                                                                                                                                                                                                                                                                                                                                                                                                                                                                                                                                                                                                                                                                                                                                                                                                                                                                                                                                                          |             |                           | Statistics for each study |         |                       |  |                       |                       | Odds ratio and 95% CI |             |             |         |                       |            |       |       |        |       |                |       |              |       |        |       |             |        |       |       |        |       |             |       |        |       |        |       |             |       |       |       |        |       |             |       |       |       |        |       |             |       |       |       |       |       |              |       |       |       |       |       |              |       |       |       |       |       |              |       |       |       |        |       |             |       |       |       |       |       |                   |       |       |       |       |       |  |       |       |       |        |       |  |
|                           |                                                                                                                                                                                                                                                                                                                                                                                                                                                                                                                                                                                                                                                                                                                                                                                                                                                                                                                                                                                                                                                                                                                                                                                                                                                                                                                                                                                                                                                                                                                                                                                                                                                                                     | Odds ratio  | Lower limit               | Upper limit               | Z-Value | p-Value               |  |                       |                       |                       |             |             |         |                       |            |       |       |        |       |                |       |              |       |        |       |             |        |       |       |        |       |             |       |        |       |        |       |             |       |       |       |        |       |             |       |       |       |        |       |             |       |       |       |       |       |              |       |       |       |       |       |              |       |       |       |       |       |              |       |       |       |        |       |             |       |       |       |       |       |                   |       |       |       |       |       |  |       |       |       |        |       |  |
| Dijk, 2004                | Blank                                                                                                                                                                                                                                                                                                                                                                                                                                                                                                                                                                                                                                                                                                                                                                                                                                                                                                                                                                                                                                                                                                                                                                                                                                                                                                                                                                                                                                                                                                                                                                                                                                                                               | 1.000       | 0.347                     | 2.885                     | 0.000   | 1.000                 |  |                       |                       |                       |             |             |         |                       |            |       |       |        |       |                |       |              |       |        |       |             |        |       |       |        |       |             |       |        |       |        |       |             |       |       |       |        |       |             |       |       |       |        |       |             |       |       |       |       |       |              |       |       |       |       |       |              |       |       |       |       |       |              |       |       |       |        |       |             |       |       |       |       |       |                   |       |       |       |       |       |  |       |       |       |        |       |  |
| Mathew, 2007              | Blank                                                                                                                                                                                                                                                                                                                                                                                                                                                                                                                                                                                                                                                                                                                                                                                                                                                                                                                                                                                                                                                                                                                                                                                                                                                                                                                                                                                                                                                                                                                                                                                                                                                                               | 0.628       | 0.337                     | 1.173                     | -1.458  | 0.145                 |  |                       |                       |                       |             |             |         |                       |            |       |       |        |       |                |       |              |       |        |       |             |        |       |       |        |       |             |       |        |       |        |       |             |       |       |       |        |       |             |       |       |       |        |       |             |       |       |       |       |       |              |       |       |       |       |       |              |       |       |       |       |       |              |       |       |       |        |       |             |       |       |       |       |       |                   |       |       |       |       |       |  |       |       |       |        |       |  |
|                           |                                                                                                                                                                                                                                                                                                                                                                                                                                                                                                                                                                                                                                                                                                                                                                                                                                                                                                                                                                                                                                                                                                                                                                                                                                                                                                                                                                                                                                                                                                                                                                                                                                                                                     | 0.708       | 0.414                     | 1.213                     | -1.256  | 0.209                 |  |                       |                       |                       |             |             |         |                       |            |       |       |        |       |                |       |              |       |        |       |             |        |       |       |        |       |             |       |        |       |        |       |             |       |       |       |        |       |             |       |       |       |        |       |             |       |       |       |       |       |              |       |       |       |       |       |              |       |       |       |       |       |              |       |       |       |        |       |             |       |       |       |       |       |                   |       |       |       |       |       |  |       |       |       |        |       |  |
| Smoking (current)         | <table border="1"> <thead> <tr> <th rowspan="2">Study name</th> <th colspan="5">Statistics for each study</th> <th rowspan="2">Odds ratio and 95% CI</th> </tr> <tr> <th>Odds ratio</th> <th>Lower limit</th> <th>Upper limit</th> <th>Z-Value</th> <th>p-Value</th> </tr> </thead> <tbody> <tr><td>Djaiani, 2003</td><td>0.982</td><td>0.657</td><td>1.467</td><td>-0.089</td><td>0.929</td></tr> <tr><td>Kadoi, 2001</td><td>0.900</td><td>0.222</td><td>3.656</td><td>-0.147</td><td>0.883</td></tr> <tr><td>Kadoi, 2002</td><td>0.700</td><td>0.211</td><td>2.322</td><td>-0.583</td><td>0.560</td></tr> <tr><td>Kadoi, 2003</td><td>0.700</td><td>0.130</td><td>3.770</td><td>-0.415</td><td>0.678</td></tr> <tr><td>Kadoi, 2005</td><td>1.275</td><td>0.665</td><td>2.445</td><td>0.733</td><td>0.464</td></tr> <tr><td></td><td>1.003</td><td>0.733</td><td>1.374</td><td>0.021</td><td>0.983</td></tr> </tbody> </table>                                                                                                                                                                                                                                                                                                                                                                                                                                                                                                                                                                                                                                                                                                                                                    | Study name  | Statistics for each study |                           |         |                       |  | Odds ratio and 95% CI | Odds ratio            | Lower limit           | Upper limit | Z-Value     | p-Value | Djaiani, 2003         | 0.982      | 0.657 | 1.467 | -0.089 | 0.929 | Kadoi, 2001    | 0.900 | 0.222        | 3.656 | -0.147 | 0.883 | Kadoi, 2002 | 0.700  | 0.211 | 2.322 | -0.583 | 0.560 | Kadoi, 2003 | 0.700 | 0.130  | 3.770 | -0.415 | 0.678 | Kadoi, 2005 | 1.275 | 0.665 | 2.445 | 0.733  | 0.464 |             | 1.003 | 0.733 | 1.374 | 0.021  | 0.983 |             |       |       |       |       |       |              |       |       |       |       |       |              |       |       |       |       |       |              |       |       |       |        |       |             |       |       |       |       |       |                   |       |       |       |       |       |  |       |       |       |        |       |  |
| Study name                | Statistics for each study                                                                                                                                                                                                                                                                                                                                                                                                                                                                                                                                                                                                                                                                                                                                                                                                                                                                                                                                                                                                                                                                                                                                                                                                                                                                                                                                                                                                                                                                                                                                                                                                                                                           |             |                           |                           |         | Odds ratio and 95% CI |  |                       |                       |                       |             |             |         |                       |            |       |       |        |       |                |       |              |       |        |       |             |        |       |       |        |       |             |       |        |       |        |       |             |       |       |       |        |       |             |       |       |       |        |       |             |       |       |       |       |       |              |       |       |       |       |       |              |       |       |       |       |       |              |       |       |       |        |       |             |       |       |       |       |       |                   |       |       |       |       |       |  |       |       |       |        |       |  |
|                           | Odds ratio                                                                                                                                                                                                                                                                                                                                                                                                                                                                                                                                                                                                                                                                                                                                                                                                                                                                                                                                                                                                                                                                                                                                                                                                                                                                                                                                                                                                                                                                                                                                                                                                                                                                          | Lower limit | Upper limit               | Z-Value                   | p-Value |                       |  |                       |                       |                       |             |             |         |                       |            |       |       |        |       |                |       |              |       |        |       |             |        |       |       |        |       |             |       |        |       |        |       |             |       |       |       |        |       |             |       |       |       |        |       |             |       |       |       |       |       |              |       |       |       |       |       |              |       |       |       |       |       |              |       |       |       |        |       |             |       |       |       |       |       |                   |       |       |       |       |       |  |       |       |       |        |       |  |
| Djaiani, 2003             | 0.982                                                                                                                                                                                                                                                                                                                                                                                                                                                                                                                                                                                                                                                                                                                                                                                                                                                                                                                                                                                                                                                                                                                                                                                                                                                                                                                                                                                                                                                                                                                                                                                                                                                                               | 0.657       | 1.467                     | -0.089                    | 0.929   |                       |  |                       |                       |                       |             |             |         |                       |            |       |       |        |       |                |       |              |       |        |       |             |        |       |       |        |       |             |       |        |       |        |       |             |       |       |       |        |       |             |       |       |       |        |       |             |       |       |       |       |       |              |       |       |       |       |       |              |       |       |       |       |       |              |       |       |       |        |       |             |       |       |       |       |       |                   |       |       |       |       |       |  |       |       |       |        |       |  |
| Kadoi, 2001               | 0.900                                                                                                                                                                                                                                                                                                                                                                                                                                                                                                                                                                                                                                                                                                                                                                                                                                                                                                                                                                                                                                                                                                                                                                                                                                                                                                                                                                                                                                                                                                                                                                                                                                                                               | 0.222       | 3.656                     | -0.147                    | 0.883   |                       |  |                       |                       |                       |             |             |         |                       |            |       |       |        |       |                |       |              |       |        |       |             |        |       |       |        |       |             |       |        |       |        |       |             |       |       |       |        |       |             |       |       |       |        |       |             |       |       |       |       |       |              |       |       |       |       |       |              |       |       |       |       |       |              |       |       |       |        |       |             |       |       |       |       |       |                   |       |       |       |       |       |  |       |       |       |        |       |  |
| Kadoi, 2002               | 0.700                                                                                                                                                                                                                                                                                                                                                                                                                                                                                                                                                                                                                                                                                                                                                                                                                                                                                                                                                                                                                                                                                                                                                                                                                                                                                                                                                                                                                                                                                                                                                                                                                                                                               | 0.211       | 2.322                     | -0.583                    | 0.560   |                       |  |                       |                       |                       |             |             |         |                       |            |       |       |        |       |                |       |              |       |        |       |             |        |       |       |        |       |             |       |        |       |        |       |             |       |       |       |        |       |             |       |       |       |        |       |             |       |       |       |       |       |              |       |       |       |       |       |              |       |       |       |       |       |              |       |       |       |        |       |             |       |       |       |       |       |                   |       |       |       |       |       |  |       |       |       |        |       |  |
| Kadoi, 2003               | 0.700                                                                                                                                                                                                                                                                                                                                                                                                                                                                                                                                                                                                                                                                                                                                                                                                                                                                                                                                                                                                                                                                                                                                                                                                                                                                                                                                                                                                                                                                                                                                                                                                                                                                               | 0.130       | 3.770                     | -0.415                    | 0.678   |                       |  |                       |                       |                       |             |             |         |                       |            |       |       |        |       |                |       |              |       |        |       |             |        |       |       |        |       |             |       |        |       |        |       |             |       |       |       |        |       |             |       |       |       |        |       |             |       |       |       |       |       |              |       |       |       |       |       |              |       |       |       |       |       |              |       |       |       |        |       |             |       |       |       |       |       |                   |       |       |       |       |       |  |       |       |       |        |       |  |
| Kadoi, 2005               | 1.275                                                                                                                                                                                                                                                                                                                                                                                                                                                                                                                                                                                                                                                                                                                                                                                                                                                                                                                                                                                                                                                                                                                                                                                                                                                                                                                                                                                                                                                                                                                                                                                                                                                                               | 0.665       | 2.445                     | 0.733                     | 0.464   |                       |  |                       |                       |                       |             |             |         |                       |            |       |       |        |       |                |       |              |       |        |       |             |        |       |       |        |       |             |       |        |       |        |       |             |       |       |       |        |       |             |       |       |       |        |       |             |       |       |       |       |       |              |       |       |       |       |       |              |       |       |       |       |       |              |       |       |       |        |       |             |       |       |       |       |       |                   |       |       |       |       |       |  |       |       |       |        |       |  |
|                           | 1.003                                                                                                                                                                                                                                                                                                                                                                                                                                                                                                                                                                                                                                                                                                                                                                                                                                                                                                                                                                                                                                                                                                                                                                                                                                                                                                                                                                                                                                                                                                                                                                                                                                                                               | 0.733       | 1.374                     | 0.021                     | 0.983   |                       |  |                       |                       |                       |             |             |         |                       |            |       |       |        |       |                |       |              |       |        |       |             |        |       |       |        |       |             |       |        |       |        |       |             |       |       |       |        |       |             |       |       |       |        |       |             |       |       |       |       |       |              |       |       |       |       |       |              |       |       |       |       |       |              |       |       |       |        |       |             |       |       |       |       |       |                   |       |       |       |       |       |  |       |       |       |        |       |  |

**Pre-Operative (Continuous)**

Age (years)

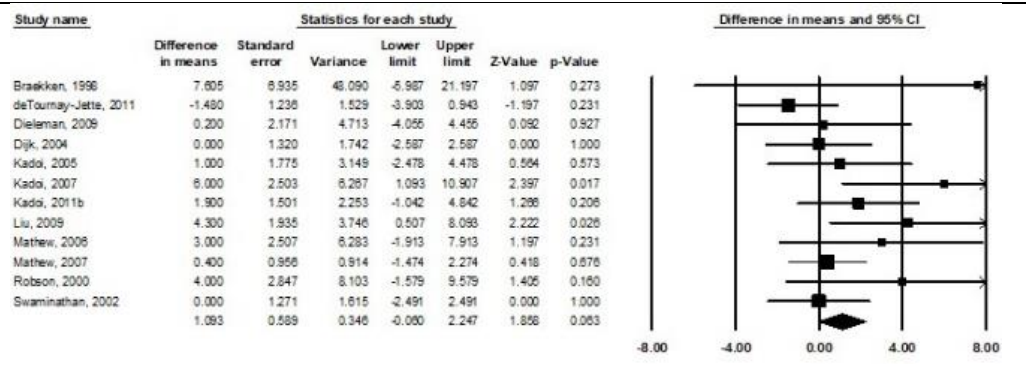

Cognition: All tests

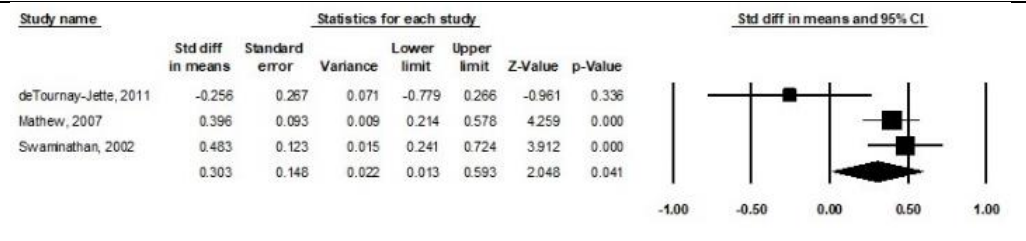

Cognition: CI only

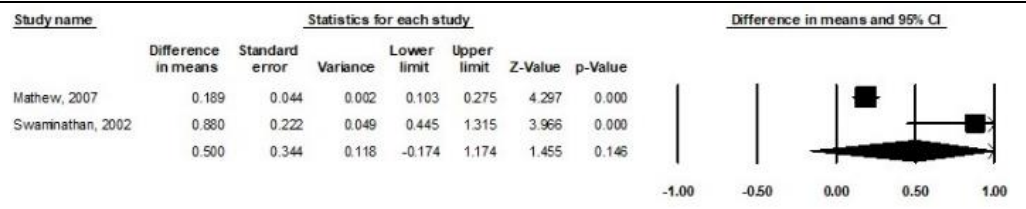

Depression: All tests

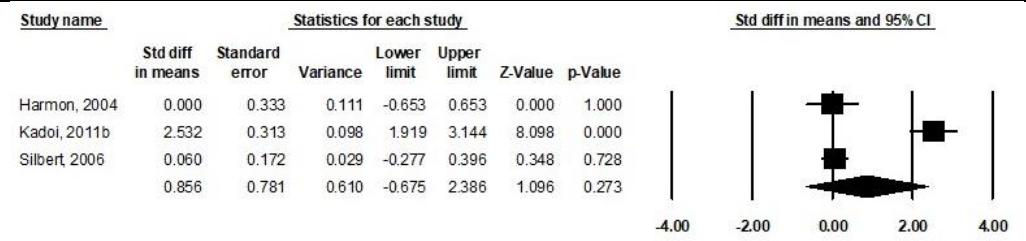

Education (years)

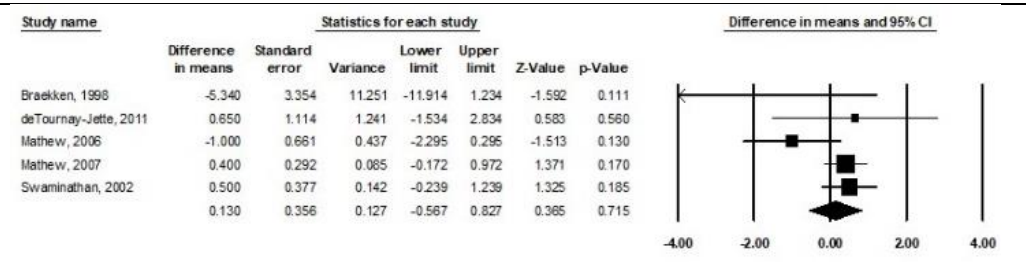

LVEF %

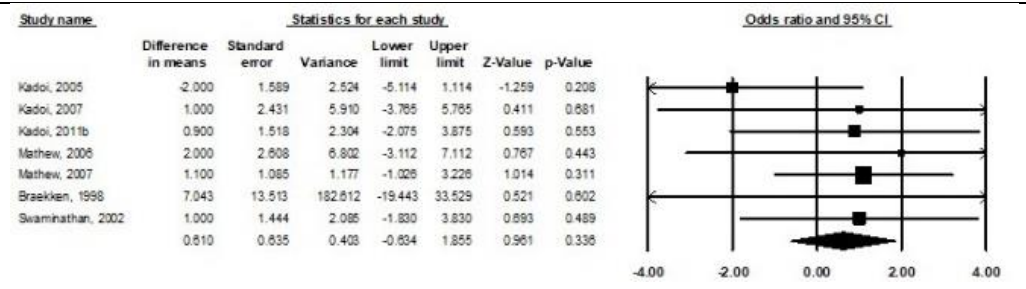

| <b>Intra-Operative (Continuous)</b> |                                                                                                                                                                                                                                                                                                                                                                                                                                                                                                                                                                                                                                                                                                                                                                                                                                                                                                                                                                                                                                                                                                                                                                                                                                                                                                                                                                                                                                                                                                                                                                        |                |                           |             |             |         |         |  |  |                                |                                |                |          |             |             |         |         |                |        |        |         |         |        |        |       |  |                |        |       |        |         |        |        |       |                 |        |       |        |        |        |        |       |                   |        |       |        |        |        |        |       |              |        |       |        |         |       |        |       |              |        |       |       |        |       |        |       |                   |        |       |        |         |        |        |       |  |       |       |       |        |       |       |       |
|-------------------------------------|------------------------------------------------------------------------------------------------------------------------------------------------------------------------------------------------------------------------------------------------------------------------------------------------------------------------------------------------------------------------------------------------------------------------------------------------------------------------------------------------------------------------------------------------------------------------------------------------------------------------------------------------------------------------------------------------------------------------------------------------------------------------------------------------------------------------------------------------------------------------------------------------------------------------------------------------------------------------------------------------------------------------------------------------------------------------------------------------------------------------------------------------------------------------------------------------------------------------------------------------------------------------------------------------------------------------------------------------------------------------------------------------------------------------------------------------------------------------------------------------------------------------------------------------------------------------|----------------|---------------------------|-------------|-------------|---------|---------|--|--|--------------------------------|--------------------------------|----------------|----------|-------------|-------------|---------|---------|----------------|--------|--------|---------|---------|--------|--------|-------|--|----------------|--------|-------|--------|---------|--------|--------|-------|-----------------|--------|-------|--------|--------|--------|--------|-------|-------------------|--------|-------|--------|--------|--------|--------|-------|--------------|--------|-------|--------|---------|-------|--------|-------|--------------|--------|-------|-------|--------|-------|--------|-------|-------------------|--------|-------|--------|---------|--------|--------|-------|--|-------|-------|-------|--------|-------|-------|-------|
| ACC time (mins)                     | <table border="1"> <thead> <tr> <th rowspan="2">Study name</th> <th colspan="7">Statistics for each study</th> <th rowspan="2">Difference in means and 95% CI</th> </tr> <tr> <th>Difference in means</th> <th>Standard error</th> <th>Variance</th> <th>Lower limit</th> <th>Upper limit</th> <th>Z-Value</th> <th>p-Value</th> </tr> </thead> <tbody> <tr> <td>Braekken, 1998</td> <td>8.086</td> <td>10.815</td> <td>116.956</td> <td>-13.111</td> <td>29.282</td> <td>0.748</td> <td>0.455</td> <td rowspan="5"> </td> </tr> <tr> <td>Mathew, 2006</td> <td>-4.300</td> <td>5.114</td> <td>26.155</td> <td>-14.324</td> <td>5.724</td> <td>-0.841</td> <td>0.400</td> </tr> <tr> <td>Mathew, 2007</td> <td>-1.900</td> <td>2.057</td> <td>4.229</td> <td>-5.931</td> <td>2.131</td> <td>-0.924</td> <td>0.356</td> </tr> <tr> <td>Swaminathan, 2002</td> <td>0.100</td> <td>2.790</td> <td>7.784</td> <td>-5.368</td> <td>5.568</td> <td>0.036</td> <td>0.971</td> </tr> <tr> <td></td> <td>-1.291</td> <td>1.559</td> <td>2.429</td> <td>-4.346</td> <td>1.763</td> <td>-0.829</td> <td>0.407</td> </tr> </tbody> </table>                                                                                                                                                                                                                                                                                                                                                                                                                                        | Study name     | Statistics for each study |             |             |         |         |  |  | Difference in means and 95% CI | Difference in means            | Standard error | Variance | Lower limit | Upper limit | Z-Value | p-Value | Braekken, 1998 | 8.086  | 10.815 | 116.956 | -13.111 | 29.282 | 0.748  | 0.455 |  | Mathew, 2006   | -4.300 | 5.114 | 26.155 | -14.324 | 5.724  | -0.841 | 0.400 | Mathew, 2007    | -1.900 | 2.057 | 4.229  | -5.931 | 2.131  | -0.924 | 0.356 | Swaminathan, 2002 | 0.100  | 2.790 | 7.784  | -5.368 | 5.568  | 0.036  | 0.971 |              | -1.291 | 1.559 | 2.429  | -4.346  | 1.763 | -0.829 | 0.407 |              |        |       |       |        |       |        |       |                   |        |       |        |         |        |        |       |  |       |       |       |        |       |       |       |
|                                     | Study name                                                                                                                                                                                                                                                                                                                                                                                                                                                                                                                                                                                                                                                                                                                                                                                                                                                                                                                                                                                                                                                                                                                                                                                                                                                                                                                                                                                                                                                                                                                                                             |                | Statistics for each study |             |             |         |         |  |  |                                | Difference in means and 95% CI |                |          |             |             |         |         |                |        |        |         |         |        |        |       |  |                |        |       |        |         |        |        |       |                 |        |       |        |        |        |        |       |                   |        |       |        |        |        |        |       |              |        |       |        |         |       |        |       |              |        |       |       |        |       |        |       |                   |        |       |        |         |        |        |       |  |       |       |       |        |       |       |       |
| Difference in means                 |                                                                                                                                                                                                                                                                                                                                                                                                                                                                                                                                                                                                                                                                                                                                                                                                                                                                                                                                                                                                                                                                                                                                                                                                                                                                                                                                                                                                                                                                                                                                                                        | Standard error | Variance                  | Lower limit | Upper limit | Z-Value | p-Value |  |  |                                |                                |                |          |             |             |         |         |                |        |        |         |         |        |        |       |  |                |        |       |        |         |        |        |       |                 |        |       |        |        |        |        |       |                   |        |       |        |        |        |        |       |              |        |       |        |         |       |        |       |              |        |       |       |        |       |        |       |                   |        |       |        |         |        |        |       |  |       |       |       |        |       |       |       |
| Braekken, 1998                      | 8.086                                                                                                                                                                                                                                                                                                                                                                                                                                                                                                                                                                                                                                                                                                                                                                                                                                                                                                                                                                                                                                                                                                                                                                                                                                                                                                                                                                                                                                                                                                                                                                  | 10.815         | 116.956                   | -13.111     | 29.282      | 0.748   | 0.455   |  |  |                                |                                |                |          |             |             |         |         |                |        |        |         |         |        |        |       |  |                |        |       |        |         |        |        |       |                 |        |       |        |        |        |        |       |                   |        |       |        |        |        |        |       |              |        |       |        |         |       |        |       |              |        |       |       |        |       |        |       |                   |        |       |        |         |        |        |       |  |       |       |       |        |       |       |       |
| Mathew, 2006                        | -4.300                                                                                                                                                                                                                                                                                                                                                                                                                                                                                                                                                                                                                                                                                                                                                                                                                                                                                                                                                                                                                                                                                                                                                                                                                                                                                                                                                                                                                                                                                                                                                                 | 5.114          | 26.155                    | -14.324     | 5.724       | -0.841  | 0.400   |  |  |                                |                                |                |          |             |             |         |         |                |        |        |         |         |        |        |       |  |                |        |       |        |         |        |        |       |                 |        |       |        |        |        |        |       |                   |        |       |        |        |        |        |       |              |        |       |        |         |       |        |       |              |        |       |       |        |       |        |       |                   |        |       |        |         |        |        |       |  |       |       |       |        |       |       |       |
| Mathew, 2007                        | -1.900                                                                                                                                                                                                                                                                                                                                                                                                                                                                                                                                                                                                                                                                                                                                                                                                                                                                                                                                                                                                                                                                                                                                                                                                                                                                                                                                                                                                                                                                                                                                                                 | 2.057          | 4.229                     | -5.931      | 2.131       | -0.924  | 0.356   |  |  |                                |                                |                |          |             |             |         |         |                |        |        |         |         |        |        |       |  |                |        |       |        |         |        |        |       |                 |        |       |        |        |        |        |       |                   |        |       |        |        |        |        |       |              |        |       |        |         |       |        |       |              |        |       |       |        |       |        |       |                   |        |       |        |         |        |        |       |  |       |       |       |        |       |       |       |
| Swaminathan, 2002                   | 0.100                                                                                                                                                                                                                                                                                                                                                                                                                                                                                                                                                                                                                                                                                                                                                                                                                                                                                                                                                                                                                                                                                                                                                                                                                                                                                                                                                                                                                                                                                                                                                                  | 2.790          | 7.784                     | -5.368      | 5.568       | 0.036   | 0.971   |  |  |                                |                                |                |          |             |             |         |         |                |        |        |         |         |        |        |       |  |                |        |       |        |         |        |        |       |                 |        |       |        |        |        |        |       |                   |        |       |        |        |        |        |       |              |        |       |        |         |       |        |       |              |        |       |       |        |       |        |       |                   |        |       |        |         |        |        |       |  |       |       |       |        |       |       |       |
|                                     | -1.291                                                                                                                                                                                                                                                                                                                                                                                                                                                                                                                                                                                                                                                                                                                                                                                                                                                                                                                                                                                                                                                                                                                                                                                                                                                                                                                                                                                                                                                                                                                                                                 | 1.559          | 2.429                     | -4.346      | 1.763       | -0.829  | 0.407   |  |  |                                |                                |                |          |             |             |         |         |                |        |        |         |         |        |        |       |  |                |        |       |        |         |        |        |       |                 |        |       |        |        |        |        |       |                   |        |       |        |        |        |        |       |              |        |       |        |         |       |        |       |              |        |       |       |        |       |        |       |                   |        |       |        |         |        |        |       |  |       |       |       |        |       |       |       |
| CPB time (mins)                     | <table border="1"> <thead> <tr> <th rowspan="2">Study name</th> <th colspan="7">Statistics for each study</th> <th rowspan="2">Difference in means and 95% CI</th> </tr> <tr> <th>Difference in means</th> <th>Standard error</th> <th>Variance</th> <th>Lower limit</th> <th>Upper limit</th> <th>Z-Value</th> <th>p-Value</th> </tr> </thead> <tbody> <tr> <td>Braekken, 1998</td> <td>5.159</td> <td>17.314</td> <td>299.780</td> <td>-28.776</td> <td>39.094</td> <td>0.298</td> <td>0.786</td> <td rowspan="8"> </td> </tr> <tr> <td>Kadoi, 2005</td> <td>8.000</td> <td>3.639</td> <td>13.242</td> <td>0.868</td> <td>15.132</td> <td>2.198</td> <td>0.028</td> </tr> <tr> <td>Kadoi, 2007</td> <td>3.000</td> <td>4.684</td> <td>21.942</td> <td>-6.181</td> <td>12.181</td> <td>0.640</td> <td>0.522</td> </tr> <tr> <td>Kadoi, 2011b</td> <td>9.900</td> <td>6.036</td> <td>36.428</td> <td>-1.929</td> <td>21.729</td> <td>1.640</td> <td>0.101</td> </tr> <tr> <td>Mathew, 2006</td> <td>-5.000</td> <td>7.473</td> <td>55.850</td> <td>-19.647</td> <td>9.647</td> <td>-0.669</td> <td>0.503</td> </tr> <tr> <td>Mathew, 2007</td> <td>-2.700</td> <td>2.977</td> <td>8.862</td> <td>-8.535</td> <td>3.135</td> <td>-0.907</td> <td>0.364</td> </tr> <tr> <td>Swaminathan, 2002</td> <td>-3.000</td> <td>6.867</td> <td>47.151</td> <td>-16.458</td> <td>10.458</td> <td>-0.437</td> <td>0.662</td> </tr> <tr> <td></td> <td>2.149</td> <td>2.343</td> <td>5.490</td> <td>-2.444</td> <td>6.741</td> <td>0.917</td> <td>0.359</td> </tr> </tbody> </table> | Study name     | Statistics for each study |             |             |         |         |  |  | Difference in means and 95% CI | Difference in means            | Standard error | Variance | Lower limit | Upper limit | Z-Value | p-Value | Braekken, 1998 | 5.159  | 17.314 | 299.780 | -28.776 | 39.094 | 0.298  | 0.786 |  | Kadoi, 2005    | 8.000  | 3.639 | 13.242 | 0.868   | 15.132 | 2.198  | 0.028 | Kadoi, 2007     | 3.000  | 4.684 | 21.942 | -6.181 | 12.181 | 0.640  | 0.522 | Kadoi, 2011b      | 9.900  | 6.036 | 36.428 | -1.929 | 21.729 | 1.640  | 0.101 | Mathew, 2006 | -5.000 | 7.473 | 55.850 | -19.647 | 9.647 | -0.669 | 0.503 | Mathew, 2007 | -2.700 | 2.977 | 8.862 | -8.535 | 3.135 | -0.907 | 0.364 | Swaminathan, 2002 | -3.000 | 6.867 | 47.151 | -16.458 | 10.458 | -0.437 | 0.662 |  | 2.149 | 2.343 | 5.490 | -2.444 | 6.741 | 0.917 | 0.359 |
|                                     | Study name                                                                                                                                                                                                                                                                                                                                                                                                                                                                                                                                                                                                                                                                                                                                                                                                                                                                                                                                                                                                                                                                                                                                                                                                                                                                                                                                                                                                                                                                                                                                                             |                | Statistics for each study |             |             |         |         |  |  |                                | Difference in means and 95% CI |                |          |             |             |         |         |                |        |        |         |         |        |        |       |  |                |        |       |        |         |        |        |       |                 |        |       |        |        |        |        |       |                   |        |       |        |        |        |        |       |              |        |       |        |         |       |        |       |              |        |       |       |        |       |        |       |                   |        |       |        |         |        |        |       |  |       |       |       |        |       |       |       |
| Difference in means                 |                                                                                                                                                                                                                                                                                                                                                                                                                                                                                                                                                                                                                                                                                                                                                                                                                                                                                                                                                                                                                                                                                                                                                                                                                                                                                                                                                                                                                                                                                                                                                                        | Standard error | Variance                  | Lower limit | Upper limit | Z-Value | p-Value |  |  |                                |                                |                |          |             |             |         |         |                |        |        |         |         |        |        |       |  |                |        |       |        |         |        |        |       |                 |        |       |        |        |        |        |       |                   |        |       |        |        |        |        |       |              |        |       |        |         |       |        |       |              |        |       |       |        |       |        |       |                   |        |       |        |         |        |        |       |  |       |       |       |        |       |       |       |
| Braekken, 1998                      | 5.159                                                                                                                                                                                                                                                                                                                                                                                                                                                                                                                                                                                                                                                                                                                                                                                                                                                                                                                                                                                                                                                                                                                                                                                                                                                                                                                                                                                                                                                                                                                                                                  | 17.314         | 299.780                   | -28.776     | 39.094      | 0.298   | 0.786   |  |  |                                |                                |                |          |             |             |         |         |                |        |        |         |         |        |        |       |  |                |        |       |        |         |        |        |       |                 |        |       |        |        |        |        |       |                   |        |       |        |        |        |        |       |              |        |       |        |         |       |        |       |              |        |       |       |        |       |        |       |                   |        |       |        |         |        |        |       |  |       |       |       |        |       |       |       |
| Kadoi, 2005                         | 8.000                                                                                                                                                                                                                                                                                                                                                                                                                                                                                                                                                                                                                                                                                                                                                                                                                                                                                                                                                                                                                                                                                                                                                                                                                                                                                                                                                                                                                                                                                                                                                                  | 3.639          | 13.242                    | 0.868       | 15.132      | 2.198   | 0.028   |  |  |                                |                                |                |          |             |             |         |         |                |        |        |         |         |        |        |       |  |                |        |       |        |         |        |        |       |                 |        |       |        |        |        |        |       |                   |        |       |        |        |        |        |       |              |        |       |        |         |       |        |       |              |        |       |       |        |       |        |       |                   |        |       |        |         |        |        |       |  |       |       |       |        |       |       |       |
| Kadoi, 2007                         | 3.000                                                                                                                                                                                                                                                                                                                                                                                                                                                                                                                                                                                                                                                                                                                                                                                                                                                                                                                                                                                                                                                                                                                                                                                                                                                                                                                                                                                                                                                                                                                                                                  | 4.684          | 21.942                    | -6.181      | 12.181      | 0.640   | 0.522   |  |  |                                |                                |                |          |             |             |         |         |                |        |        |         |         |        |        |       |  |                |        |       |        |         |        |        |       |                 |        |       |        |        |        |        |       |                   |        |       |        |        |        |        |       |              |        |       |        |         |       |        |       |              |        |       |       |        |       |        |       |                   |        |       |        |         |        |        |       |  |       |       |       |        |       |       |       |
| Kadoi, 2011b                        | 9.900                                                                                                                                                                                                                                                                                                                                                                                                                                                                                                                                                                                                                                                                                                                                                                                                                                                                                                                                                                                                                                                                                                                                                                                                                                                                                                                                                                                                                                                                                                                                                                  | 6.036          | 36.428                    | -1.929      | 21.729      | 1.640   | 0.101   |  |  |                                |                                |                |          |             |             |         |         |                |        |        |         |         |        |        |       |  |                |        |       |        |         |        |        |       |                 |        |       |        |        |        |        |       |                   |        |       |        |        |        |        |       |              |        |       |        |         |       |        |       |              |        |       |       |        |       |        |       |                   |        |       |        |         |        |        |       |  |       |       |       |        |       |       |       |
| Mathew, 2006                        | -5.000                                                                                                                                                                                                                                                                                                                                                                                                                                                                                                                                                                                                                                                                                                                                                                                                                                                                                                                                                                                                                                                                                                                                                                                                                                                                                                                                                                                                                                                                                                                                                                 | 7.473          | 55.850                    | -19.647     | 9.647       | -0.669  | 0.503   |  |  |                                |                                |                |          |             |             |         |         |                |        |        |         |         |        |        |       |  |                |        |       |        |         |        |        |       |                 |        |       |        |        |        |        |       |                   |        |       |        |        |        |        |       |              |        |       |        |         |       |        |       |              |        |       |       |        |       |        |       |                   |        |       |        |         |        |        |       |  |       |       |       |        |       |       |       |
| Mathew, 2007                        | -2.700                                                                                                                                                                                                                                                                                                                                                                                                                                                                                                                                                                                                                                                                                                                                                                                                                                                                                                                                                                                                                                                                                                                                                                                                                                                                                                                                                                                                                                                                                                                                                                 | 2.977          | 8.862                     | -8.535      | 3.135       | -0.907  | 0.364   |  |  |                                |                                |                |          |             |             |         |         |                |        |        |         |         |        |        |       |  |                |        |       |        |         |        |        |       |                 |        |       |        |        |        |        |       |                   |        |       |        |        |        |        |       |              |        |       |        |         |       |        |       |              |        |       |       |        |       |        |       |                   |        |       |        |         |        |        |       |  |       |       |       |        |       |       |       |
| Swaminathan, 2002                   | -3.000                                                                                                                                                                                                                                                                                                                                                                                                                                                                                                                                                                                                                                                                                                                                                                                                                                                                                                                                                                                                                                                                                                                                                                                                                                                                                                                                                                                                                                                                                                                                                                 | 6.867          | 47.151                    | -16.458     | 10.458      | -0.437  | 0.662   |  |  |                                |                                |                |          |             |             |         |         |                |        |        |         |         |        |        |       |  |                |        |       |        |         |        |        |       |                 |        |       |        |        |        |        |       |                   |        |       |        |        |        |        |       |              |        |       |        |         |       |        |       |              |        |       |       |        |       |        |       |                   |        |       |        |         |        |        |       |  |       |       |       |        |       |       |       |
|                                     | 2.149                                                                                                                                                                                                                                                                                                                                                                                                                                                                                                                                                                                                                                                                                                                                                                                                                                                                                                                                                                                                                                                                                                                                                                                                                                                                                                                                                                                                                                                                                                                                                                  | 2.343          | 5.490                     | -2.444      | 6.741       | 0.917   | 0.359   |  |  |                                |                                |                |          |             |             |         |         |                |        |        |         |         |        |        |       |  |                |        |       |        |         |        |        |       |                 |        |       |        |        |        |        |       |                   |        |       |        |        |        |        |       |              |        |       |        |         |       |        |       |              |        |       |       |        |       |        |       |                   |        |       |        |         |        |        |       |  |       |       |       |        |       |       |       |
| Number of grafts                    | <table border="1"> <thead> <tr> <th rowspan="2">Study name</th> <th colspan="7">Statistics for each study</th> <th rowspan="2">Difference in means and 95% CI</th> </tr> <tr> <th>Difference in means</th> <th>Standard error</th> <th>Variance</th> <th>Lower limit</th> <th>Upper limit</th> <th>Z-Value</th> <th>p-Value</th> </tr> </thead> <tbody> <tr> <td>Dieleman, 2009</td> <td>0.020</td> <td>0.244</td> <td>0.059</td> <td>-0.458</td> <td>0.497</td> <td>0.081</td> <td>0.935</td> <td rowspan="5"> </td> </tr> <tr> <td>Mathew, 2006</td> <td>-0.200</td> <td>0.164</td> <td>0.027</td> <td>-0.521</td> <td>0.121</td> <td>-1.222</td> <td>0.222</td> </tr> <tr> <td>Mathew, 2007</td> <td>0.000</td> <td>0.083</td> <td>0.007</td> <td>-0.163</td> <td>0.163</td> <td>0.000</td> <td>1.000</td> </tr> <tr> <td>Swaminathan, 2002</td> <td>-0.100</td> <td>0.110</td> <td>0.012</td> <td>-0.315</td> <td>0.115</td> <td>-0.913</td> <td>0.361</td> </tr> <tr> <td></td> <td>-0.055</td> <td>0.059</td> <td>0.004</td> <td>-0.171</td> <td>0.062</td> <td>-0.920</td> <td>0.358</td> </tr> </tbody> </table>                                                                                                                                                                                                                                                                                                                                                                                                                                               | Study name     | Statistics for each study |             |             |         |         |  |  | Difference in means and 95% CI | Difference in means            | Standard error | Variance | Lower limit | Upper limit | Z-Value | p-Value | Dieleman, 2009 | 0.020  | 0.244  | 0.059   | -0.458  | 0.497  | 0.081  | 0.935 |  | Mathew, 2006   | -0.200 | 0.164 | 0.027  | -0.521  | 0.121  | -1.222 | 0.222 | Mathew, 2007    | 0.000  | 0.083 | 0.007  | -0.163 | 0.163  | 0.000  | 1.000 | Swaminathan, 2002 | -0.100 | 0.110 | 0.012  | -0.315 | 0.115  | -0.913 | 0.361 |              | -0.055 | 0.059 | 0.004  | -0.171  | 0.062 | -0.920 | 0.358 |              |        |       |       |        |       |        |       |                   |        |       |        |         |        |        |       |  |       |       |       |        |       |       |       |
|                                     | Study name                                                                                                                                                                                                                                                                                                                                                                                                                                                                                                                                                                                                                                                                                                                                                                                                                                                                                                                                                                                                                                                                                                                                                                                                                                                                                                                                                                                                                                                                                                                                                             |                | Statistics for each study |             |             |         |         |  |  |                                | Difference in means and 95% CI |                |          |             |             |         |         |                |        |        |         |         |        |        |       |  |                |        |       |        |         |        |        |       |                 |        |       |        |        |        |        |       |                   |        |       |        |        |        |        |       |              |        |       |        |         |       |        |       |              |        |       |       |        |       |        |       |                   |        |       |        |         |        |        |       |  |       |       |       |        |       |       |       |
| Difference in means                 |                                                                                                                                                                                                                                                                                                                                                                                                                                                                                                                                                                                                                                                                                                                                                                                                                                                                                                                                                                                                                                                                                                                                                                                                                                                                                                                                                                                                                                                                                                                                                                        | Standard error | Variance                  | Lower limit | Upper limit | Z-Value | p-Value |  |  |                                |                                |                |          |             |             |         |         |                |        |        |         |         |        |        |       |  |                |        |       |        |         |        |        |       |                 |        |       |        |        |        |        |       |                   |        |       |        |        |        |        |       |              |        |       |        |         |       |        |       |              |        |       |       |        |       |        |       |                   |        |       |        |         |        |        |       |  |       |       |       |        |       |       |       |
| Dieleman, 2009                      | 0.020                                                                                                                                                                                                                                                                                                                                                                                                                                                                                                                                                                                                                                                                                                                                                                                                                                                                                                                                                                                                                                                                                                                                                                                                                                                                                                                                                                                                                                                                                                                                                                  | 0.244          | 0.059                     | -0.458      | 0.497       | 0.081   | 0.935   |  |  |                                |                                |                |          |             |             |         |         |                |        |        |         |         |        |        |       |  |                |        |       |        |         |        |        |       |                 |        |       |        |        |        |        |       |                   |        |       |        |        |        |        |       |              |        |       |        |         |       |        |       |              |        |       |       |        |       |        |       |                   |        |       |        |         |        |        |       |  |       |       |       |        |       |       |       |
| Mathew, 2006                        | -0.200                                                                                                                                                                                                                                                                                                                                                                                                                                                                                                                                                                                                                                                                                                                                                                                                                                                                                                                                                                                                                                                                                                                                                                                                                                                                                                                                                                                                                                                                                                                                                                 | 0.164          | 0.027                     | -0.521      | 0.121       | -1.222  | 0.222   |  |  |                                |                                |                |          |             |             |         |         |                |        |        |         |         |        |        |       |  |                |        |       |        |         |        |        |       |                 |        |       |        |        |        |        |       |                   |        |       |        |        |        |        |       |              |        |       |        |         |       |        |       |              |        |       |       |        |       |        |       |                   |        |       |        |         |        |        |       |  |       |       |       |        |       |       |       |
| Mathew, 2007                        | 0.000                                                                                                                                                                                                                                                                                                                                                                                                                                                                                                                                                                                                                                                                                                                                                                                                                                                                                                                                                                                                                                                                                                                                                                                                                                                                                                                                                                                                                                                                                                                                                                  | 0.083          | 0.007                     | -0.163      | 0.163       | 0.000   | 1.000   |  |  |                                |                                |                |          |             |             |         |         |                |        |        |         |         |        |        |       |  |                |        |       |        |         |        |        |       |                 |        |       |        |        |        |        |       |                   |        |       |        |        |        |        |       |              |        |       |        |         |       |        |       |              |        |       |       |        |       |        |       |                   |        |       |        |         |        |        |       |  |       |       |       |        |       |       |       |
| Swaminathan, 2002                   | -0.100                                                                                                                                                                                                                                                                                                                                                                                                                                                                                                                                                                                                                                                                                                                                                                                                                                                                                                                                                                                                                                                                                                                                                                                                                                                                                                                                                                                                                                                                                                                                                                 | 0.110          | 0.012                     | -0.315      | 0.115       | -0.913  | 0.361   |  |  |                                |                                |                |          |             |             |         |         |                |        |        |         |         |        |        |       |  |                |        |       |        |         |        |        |       |                 |        |       |        |        |        |        |       |                   |        |       |        |        |        |        |       |              |        |       |        |         |       |        |       |              |        |       |       |        |       |        |       |                   |        |       |        |         |        |        |       |  |       |       |       |        |       |       |       |
|                                     | -0.055                                                                                                                                                                                                                                                                                                                                                                                                                                                                                                                                                                                                                                                                                                                                                                                                                                                                                                                                                                                                                                                                                                                                                                                                                                                                                                                                                                                                                                                                                                                                                                 | 0.059          | 0.004                     | -0.171      | 0.062       | -0.920  | 0.358   |  |  |                                |                                |                |          |             |             |         |         |                |        |        |         |         |        |        |       |  |                |        |       |        |         |        |        |       |                 |        |       |        |        |        |        |       |                   |        |       |        |        |        |        |       |              |        |       |        |         |       |        |       |              |        |       |       |        |       |        |       |                   |        |       |        |         |        |        |       |  |       |       |       |        |       |       |       |
| Total Microemboli                   | <table border="1"> <thead> <tr> <th rowspan="2">Study name</th> <th colspan="7">Statistics for each study</th> <th rowspan="2">Std diff in means and 95% CI</th> </tr> <tr> <th>Std diff in means</th> <th>Standard error</th> <th>Variance</th> <th>Lower limit</th> <th>Upper limit</th> <th>Z-Value</th> <th>p-Value</th> </tr> </thead> <tbody> <tr> <td>Braekken, 1998</td> <td>-0.770</td> <td>0.778</td> <td>0.605</td> <td>-2.294</td> <td>0.753</td> <td>-0.991</td> <td>0.322</td> <td rowspan="5"> </td> </tr> <tr> <td>Liu, 2009</td> <td>-0.076</td> <td>0.244</td> <td>0.059</td> <td>-0.553</td> <td>0.402</td> <td>-0.310</td> <td>0.756</td> </tr> <tr> <td>Rodriguez, 2010</td> <td>-0.310</td> <td>0.226</td> <td>0.051</td> <td>-0.752</td> <td>0.133</td> <td>-1.372</td> <td>0.170</td> </tr> <tr> <td>Royse, 2000</td> <td>-1.491</td> <td>0.535</td> <td>0.287</td> <td>-2.541</td> <td>-0.442</td> <td>-2.786</td> <td>0.005</td> </tr> <tr> <td></td> <td>-0.459</td> <td>0.258</td> <td>0.067</td> <td>-0.965</td> <td>0.048</td> <td>-1.775</td> <td>0.076</td> </tr> </tbody> </table>                                                                                                                                                                                                                                                                                                                                                                                                                                                    | Study name     | Statistics for each study |             |             |         |         |  |  | Std diff in means and 95% CI   | Std diff in means              | Standard error | Variance | Lower limit | Upper limit | Z-Value | p-Value | Braekken, 1998 | -0.770 | 0.778  | 0.605   | -2.294  | 0.753  | -0.991 | 0.322 |  | Liu, 2009      | -0.076 | 0.244 | 0.059  | -0.553  | 0.402  | -0.310 | 0.756 | Rodriguez, 2010 | -0.310 | 0.226 | 0.051  | -0.752 | 0.133  | -1.372 | 0.170 | Royse, 2000       | -1.491 | 0.535 | 0.287  | -2.541 | -0.442 | -2.786 | 0.005 |              | -0.459 | 0.258 | 0.067  | -0.965  | 0.048 | -1.775 | 0.076 |              |        |       |       |        |       |        |       |                   |        |       |        |         |        |        |       |  |       |       |       |        |       |       |       |
|                                     | Study name                                                                                                                                                                                                                                                                                                                                                                                                                                                                                                                                                                                                                                                                                                                                                                                                                                                                                                                                                                                                                                                                                                                                                                                                                                                                                                                                                                                                                                                                                                                                                             |                | Statistics for each study |             |             |         |         |  |  |                                | Std diff in means and 95% CI   |                |          |             |             |         |         |                |        |        |         |         |        |        |       |  |                |        |       |        |         |        |        |       |                 |        |       |        |        |        |        |       |                   |        |       |        |        |        |        |       |              |        |       |        |         |       |        |       |              |        |       |       |        |       |        |       |                   |        |       |        |         |        |        |       |  |       |       |       |        |       |       |       |
| Std diff in means                   |                                                                                                                                                                                                                                                                                                                                                                                                                                                                                                                                                                                                                                                                                                                                                                                                                                                                                                                                                                                                                                                                                                                                                                                                                                                                                                                                                                                                                                                                                                                                                                        | Standard error | Variance                  | Lower limit | Upper limit | Z-Value | p-Value |  |  |                                |                                |                |          |             |             |         |         |                |        |        |         |         |        |        |       |  |                |        |       |        |         |        |        |       |                 |        |       |        |        |        |        |       |                   |        |       |        |        |        |        |       |              |        |       |        |         |       |        |       |              |        |       |       |        |       |        |       |                   |        |       |        |         |        |        |       |  |       |       |       |        |       |       |       |
| Braekken, 1998                      | -0.770                                                                                                                                                                                                                                                                                                                                                                                                                                                                                                                                                                                                                                                                                                                                                                                                                                                                                                                                                                                                                                                                                                                                                                                                                                                                                                                                                                                                                                                                                                                                                                 | 0.778          | 0.605                     | -2.294      | 0.753       | -0.991  | 0.322   |  |  |                                |                                |                |          |             |             |         |         |                |        |        |         |         |        |        |       |  |                |        |       |        |         |        |        |       |                 |        |       |        |        |        |        |       |                   |        |       |        |        |        |        |       |              |        |       |        |         |       |        |       |              |        |       |       |        |       |        |       |                   |        |       |        |         |        |        |       |  |       |       |       |        |       |       |       |
| Liu, 2009                           | -0.076                                                                                                                                                                                                                                                                                                                                                                                                                                                                                                                                                                                                                                                                                                                                                                                                                                                                                                                                                                                                                                                                                                                                                                                                                                                                                                                                                                                                                                                                                                                                                                 | 0.244          | 0.059                     | -0.553      | 0.402       | -0.310  | 0.756   |  |  |                                |                                |                |          |             |             |         |         |                |        |        |         |         |        |        |       |  |                |        |       |        |         |        |        |       |                 |        |       |        |        |        |        |       |                   |        |       |        |        |        |        |       |              |        |       |        |         |       |        |       |              |        |       |       |        |       |        |       |                   |        |       |        |         |        |        |       |  |       |       |       |        |       |       |       |
| Rodriguez, 2010                     | -0.310                                                                                                                                                                                                                                                                                                                                                                                                                                                                                                                                                                                                                                                                                                                                                                                                                                                                                                                                                                                                                                                                                                                                                                                                                                                                                                                                                                                                                                                                                                                                                                 | 0.226          | 0.051                     | -0.752      | 0.133       | -1.372  | 0.170   |  |  |                                |                                |                |          |             |             |         |         |                |        |        |         |         |        |        |       |  |                |        |       |        |         |        |        |       |                 |        |       |        |        |        |        |       |                   |        |       |        |        |        |        |       |              |        |       |        |         |       |        |       |              |        |       |       |        |       |        |       |                   |        |       |        |         |        |        |       |  |       |       |       |        |       |       |       |
| Royse, 2000                         | -1.491                                                                                                                                                                                                                                                                                                                                                                                                                                                                                                                                                                                                                                                                                                                                                                                                                                                                                                                                                                                                                                                                                                                                                                                                                                                                                                                                                                                                                                                                                                                                                                 | 0.535          | 0.287                     | -2.541      | -0.442      | -2.786  | 0.005   |  |  |                                |                                |                |          |             |             |         |         |                |        |        |         |         |        |        |       |  |                |        |       |        |         |        |        |       |                 |        |       |        |        |        |        |       |                   |        |       |        |        |        |        |       |              |        |       |        |         |       |        |       |              |        |       |       |        |       |        |       |                   |        |       |        |         |        |        |       |  |       |       |       |        |       |       |       |
|                                     | -0.459                                                                                                                                                                                                                                                                                                                                                                                                                                                                                                                                                                                                                                                                                                                                                                                                                                                                                                                                                                                                                                                                                                                                                                                                                                                                                                                                                                                                                                                                                                                                                                 | 0.258          | 0.067                     | -0.965      | 0.048       | -1.775  | 0.076   |  |  |                                |                                |                |          |             |             |         |         |                |        |        |         |         |        |        |       |  |                |        |       |        |         |        |        |       |                 |        |       |        |        |        |        |       |                   |        |       |        |        |        |        |       |              |        |       |        |         |       |        |       |              |        |       |       |        |       |        |       |                   |        |       |        |         |        |        |       |  |       |       |       |        |       |       |       |
| <b>Post-Operative (Continuous)</b>  |                                                                                                                                                                                                                                                                                                                                                                                                                                                                                                                                                                                                                                                                                                                                                                                                                                                                                                                                                                                                                                                                                                                                                                                                                                                                                                                                                                                                                                                                                                                                                                        |                |                           |             |             |         |         |  |  |                                |                                |                |          |             |             |         |         |                |        |        |         |         |        |        |       |  |                |        |       |        |         |        |        |       |                 |        |       |        |        |        |        |       |                   |        |       |        |        |        |        |       |              |        |       |        |         |       |        |       |              |        |       |       |        |       |        |       |                   |        |       |        |         |        |        |       |  |       |       |       |        |       |       |       |
| LOS in ICU (days)                   | <table border="1"> <thead> <tr> <th rowspan="2">Study name</th> <th colspan="7">Statistics for each study</th> <th rowspan="2">Difference in means and 95% CI</th> </tr> <tr> <th>Difference in means</th> <th>Standard error</th> <th>Variance</th> <th>Lower limit</th> <th>Upper limit</th> <th>Z-Value</th> <th>p-Value</th> </tr> </thead> <tbody> <tr> <td>Baba, 2007</td> <td>0.880</td> <td>0.276</td> <td>0.076</td> <td>0.338</td> <td>1.422</td> <td>3.185</td> <td>0.001</td> <td rowspan="3"> </td> </tr> <tr> <td>Dieleman, 2009</td> <td>-0.470</td> <td>0.371</td> <td>0.137</td> <td>-1.197</td> <td>0.257</td> <td>-1.268</td> <td>0.205</td> </tr> <tr> <td></td> <td>0.228</td> <td>0.675</td> <td>0.455</td> <td>-1.095</td> <td>1.550</td> <td>0.337</td> <td>0.736</td> </tr> </tbody> </table>                                                                                                                                                                                                                                                                                                                                                                                                                                                                                                                                                                                                                                                                                                                                                 | Study name     | Statistics for each study |             |             |         |         |  |  | Difference in means and 95% CI | Difference in means            | Standard error | Variance | Lower limit | Upper limit | Z-Value | p-Value | Baba, 2007     | 0.880  | 0.276  | 0.076   | 0.338   | 1.422  | 3.185  | 0.001 |  | Dieleman, 2009 | -0.470 | 0.371 | 0.137  | -1.197  | 0.257  | -1.268 | 0.205 |                 | 0.228  | 0.675 | 0.455  | -1.095 | 1.550  | 0.337  | 0.736 |                   |        |       |        |        |        |        |       |              |        |       |        |         |       |        |       |              |        |       |       |        |       |        |       |                   |        |       |        |         |        |        |       |  |       |       |       |        |       |       |       |
|                                     | Study name                                                                                                                                                                                                                                                                                                                                                                                                                                                                                                                                                                                                                                                                                                                                                                                                                                                                                                                                                                                                                                                                                                                                                                                                                                                                                                                                                                                                                                                                                                                                                             |                | Statistics for each study |             |             |         |         |  |  |                                | Difference in means and 95% CI |                |          |             |             |         |         |                |        |        |         |         |        |        |       |  |                |        |       |        |         |        |        |       |                 |        |       |        |        |        |        |       |                   |        |       |        |        |        |        |       |              |        |       |        |         |       |        |       |              |        |       |       |        |       |        |       |                   |        |       |        |         |        |        |       |  |       |       |       |        |       |       |       |
| Difference in means                 |                                                                                                                                                                                                                                                                                                                                                                                                                                                                                                                                                                                                                                                                                                                                                                                                                                                                                                                                                                                                                                                                                                                                                                                                                                                                                                                                                                                                                                                                                                                                                                        | Standard error | Variance                  | Lower limit | Upper limit | Z-Value | p-Value |  |  |                                |                                |                |          |             |             |         |         |                |        |        |         |         |        |        |       |  |                |        |       |        |         |        |        |       |                 |        |       |        |        |        |        |       |                   |        |       |        |        |        |        |       |              |        |       |        |         |       |        |       |              |        |       |       |        |       |        |       |                   |        |       |        |         |        |        |       |  |       |       |       |        |       |       |       |
| Baba, 2007                          | 0.880                                                                                                                                                                                                                                                                                                                                                                                                                                                                                                                                                                                                                                                                                                                                                                                                                                                                                                                                                                                                                                                                                                                                                                                                                                                                                                                                                                                                                                                                                                                                                                  | 0.276          | 0.076                     | 0.338       | 1.422       | 3.185   | 0.001   |  |  |                                |                                |                |          |             |             |         |         |                |        |        |         |         |        |        |       |  |                |        |       |        |         |        |        |       |                 |        |       |        |        |        |        |       |                   |        |       |        |        |        |        |       |              |        |       |        |         |       |        |       |              |        |       |       |        |       |        |       |                   |        |       |        |         |        |        |       |  |       |       |       |        |       |       |       |
| Dieleman, 2009                      | -0.470                                                                                                                                                                                                                                                                                                                                                                                                                                                                                                                                                                                                                                                                                                                                                                                                                                                                                                                                                                                                                                                                                                                                                                                                                                                                                                                                                                                                                                                                                                                                                                 | 0.371          | 0.137                     | -1.197      | 0.257       | -1.268  | 0.205   |  |  |                                |                                |                |          |             |             |         |         |                |        |        |         |         |        |        |       |  |                |        |       |        |         |        |        |       |                 |        |       |        |        |        |        |       |                   |        |       |        |        |        |        |       |              |        |       |        |         |       |        |       |              |        |       |       |        |       |        |       |                   |        |       |        |         |        |        |       |  |       |       |       |        |       |       |       |
|                                     | 0.228                                                                                                                                                                                                                                                                                                                                                                                                                                                                                                                                                                                                                                                                                                                                                                                                                                                                                                                                                                                                                                                                                                                                                                                                                                                                                                                                                                                                                                                                                                                                                                  | 0.675          | 0.455                     | -1.095      | 1.550       | 0.337   | 0.736   |  |  |                                |                                |                |          |             |             |         |         |                |        |        |         |         |        |        |       |  |                |        |       |        |         |        |        |       |                 |        |       |        |        |        |        |       |                   |        |       |        |        |        |        |       |              |        |       |        |         |       |        |       |              |        |       |       |        |       |        |       |                   |        |       |        |         |        |        |       |  |       |       |       |        |       |       |       |

**Figure S6. Funnel plots for statistically significant analyses in regard to mid-term cognitive decline post-CABG, and results of publication bias/small-study effect investigation when more than 10 studies were available.**

|                                   | Egger's Test                                  |                       | Trim and Fill          |                 |       |
|-----------------------------------|-----------------------------------------------|-----------------------|------------------------|-----------------|-------|
|                                   | Intercept                                     | p value<br>(1-tailed) | No. imputed<br>studies | OR/MD†<br>/SMD‡ | 95%CI |
| <b>Preoperative (Categorical)</b> |                                               |                       |                        |                 |       |
| Depression                        | Only 2 studies, could not produce funnel plot |                       | -                      | -               | -     |
| <b>Preoperative (Continuous)</b>  |                                               |                       |                        |                 |       |
| Cognition: All tests              |                                               |                       |                        |                 |       |

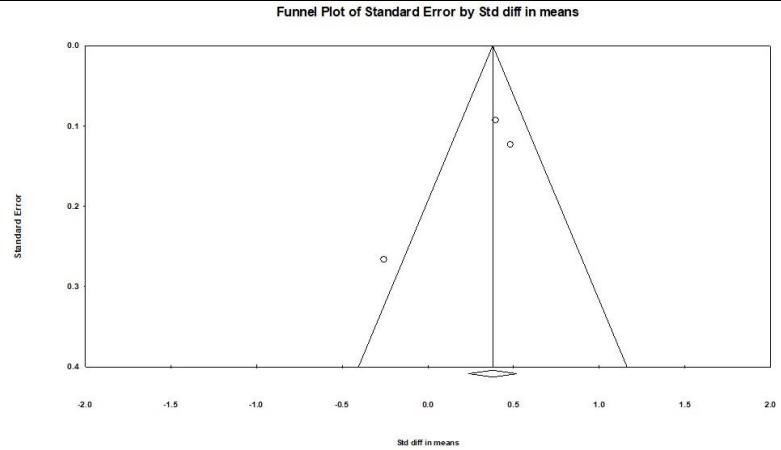



**Figure S7. Forest plots for long-term cognitive decline post-CABG analyses.**

| Variable                            | Forest Plot                                                                                                                                                                                                                                                                                                                                                                                                                                                                                                                                                                                                                                                                                                                                                                                                                             |                   |                                  |             |             |                              |         |                                       |  |                                       |             |                     |                |          |             |                |         |         |       |                |       |       |                  |        |       |         |       |       |           |        |       |       |        |       |        |       |  |       |       |       |        |       |       |       |
|-------------------------------------|-----------------------------------------------------------------------------------------------------------------------------------------------------------------------------------------------------------------------------------------------------------------------------------------------------------------------------------------------------------------------------------------------------------------------------------------------------------------------------------------------------------------------------------------------------------------------------------------------------------------------------------------------------------------------------------------------------------------------------------------------------------------------------------------------------------------------------------------|-------------------|----------------------------------|-------------|-------------|------------------------------|---------|---------------------------------------|--|---------------------------------------|-------------|---------------------|----------------|----------|-------------|----------------|---------|---------|-------|----------------|-------|-------|------------------|--------|-------|---------|-------|-------|-----------|--------|-------|-------|--------|-------|--------|-------|--|-------|-------|-------|--------|-------|-------|-------|
| <b>Pre-Operative (Categorical)</b>  |                                                                                                                                                                                                                                                                                                                                                                                                                                                                                                                                                                                                                                                                                                                                                                                                                                         |                   |                                  |             |             |                              |         |                                       |  |                                       |             |                     |                |          |             |                |         |         |       |                |       |       |                  |        |       |         |       |       |           |        |       |       |        |       |        |       |  |       |       |       |        |       |       |       |
| Cognitive Impairment                | <table border="1"> <thead> <tr> <th><u>Study name</u></th> <th colspan="5"><u>Statistics for each study</u></th> <th><u>Odds ratio and 95% CI</u></th> </tr> <tr> <th></th> <th>Odds ratio</th> <th>Lower limit</th> <th>Upper limit</th> <th>Z-Value</th> <th>p-Value</th> <th></th> </tr> </thead> <tbody> <tr> <td>Silbert, 2008</td> <td>0.824</td> <td>0.385</td> <td>1.763</td> <td>-0.499</td> <td>0.618</td> <td rowspan="3"> </td> </tr> <tr> <td>Trubnikova, 2014</td> <td>1.339</td> <td>0.563</td> <td>3.189</td> <td>0.660</td> <td>0.509</td> </tr> <tr> <td></td> <td>1.018</td> <td>0.574</td> <td>1.803</td> <td>0.060</td> <td>0.952</td> </tr> </tbody> </table>                                                                                                                                                     | <u>Study name</u> | <u>Statistics for each study</u> |             |             |                              |         | <u>Odds ratio and 95% CI</u>          |  | Odds ratio                            | Lower limit | Upper limit         | Z-Value        | p-Value  |             | Silbert, 2008  | 0.824   | 0.385   | 1.763 | -0.499         | 0.618 |       | Trubnikova, 2014 | 1.339  | 0.563 | 3.189   | 0.660 | 0.509 |           | 1.018  | 0.574 | 1.803 | 0.060  | 0.952 |        |       |  |       |       |       |        |       |       |       |
| <u>Study name</u>                   | <u>Statistics for each study</u>                                                                                                                                                                                                                                                                                                                                                                                                                                                                                                                                                                                                                                                                                                                                                                                                        |                   |                                  |             |             | <u>Odds ratio and 95% CI</u> |         |                                       |  |                                       |             |                     |                |          |             |                |         |         |       |                |       |       |                  |        |       |         |       |       |           |        |       |       |        |       |        |       |  |       |       |       |        |       |       |       |
|                                     | Odds ratio                                                                                                                                                                                                                                                                                                                                                                                                                                                                                                                                                                                                                                                                                                                                                                                                                              | Lower limit       | Upper limit                      | Z-Value     | p-Value     |                              |         |                                       |  |                                       |             |                     |                |          |             |                |         |         |       |                |       |       |                  |        |       |         |       |       |           |        |       |       |        |       |        |       |  |       |       |       |        |       |       |       |
| Silbert, 2008                       | 0.824                                                                                                                                                                                                                                                                                                                                                                                                                                                                                                                                                                                                                                                                                                                                                                                                                                   | 0.385             | 1.763                            | -0.499      | 0.618       |                              |         |                                       |  |                                       |             |                     |                |          |             |                |         |         |       |                |       |       |                  |        |       |         |       |       |           |        |       |       |        |       |        |       |  |       |       |       |        |       |       |       |
| Trubnikova, 2014                    | 1.339                                                                                                                                                                                                                                                                                                                                                                                                                                                                                                                                                                                                                                                                                                                                                                                                                                   | 0.563             | 3.189                            | 0.660       | 0.509       |                              |         |                                       |  |                                       |             |                     |                |          |             |                |         |         |       |                |       |       |                  |        |       |         |       |       |           |        |       |       |        |       |        |       |  |       |       |       |        |       |       |       |
|                                     | 1.018                                                                                                                                                                                                                                                                                                                                                                                                                                                                                                                                                                                                                                                                                                                                                                                                                                   | 0.574             | 1.803                            | 0.060       | 0.952       |                              |         |                                       |  |                                       |             |                     |                |          |             |                |         |         |       |                |       |       |                  |        |       |         |       |       |           |        |       |       |        |       |        |       |  |       |       |       |        |       |       |       |
| Diabetes                            | <table border="1"> <thead> <tr> <th><u>Study name</u></th> <th colspan="5"><u>Statistics for each study</u></th> <th><u>Odds ratio and 95% CI</u></th> </tr> <tr> <th></th> <th>Odds ratio</th> <th>Lower limit</th> <th>Upper limit</th> <th>Z-Value</th> <th>p-Value</th> <th></th> </tr> </thead> <tbody> <tr> <td>Dieleman, 2009</td> <td>1.064</td> <td>0.346</td> <td>3.277</td> <td>0.109</td> <td>0.913</td> <td rowspan="3"> </td> </tr> <tr> <td>Lachmann, 2018</td> <td>1.623</td> <td>0.788</td> <td>3.345</td> <td>1.313</td> <td>0.189</td> </tr> <tr> <td></td> <td>1.435</td> <td>0.781</td> <td>2.636</td> <td>1.164</td> <td>0.245</td> </tr> </tbody> </table>                                                                                                                                                       | <u>Study name</u> | <u>Statistics for each study</u> |             |             |                              |         | <u>Odds ratio and 95% CI</u>          |  | Odds ratio                            | Lower limit | Upper limit         | Z-Value        | p-Value  |             | Dieleman, 2009 | 1.064   | 0.346   | 3.277 | 0.109          | 0.913 |       | Lachmann, 2018   | 1.623  | 0.788 | 3.345   | 1.313 | 0.189 |           | 1.435  | 0.781 | 2.636 | 1.164  | 0.245 |        |       |  |       |       |       |        |       |       |       |
| <u>Study name</u>                   | <u>Statistics for each study</u>                                                                                                                                                                                                                                                                                                                                                                                                                                                                                                                                                                                                                                                                                                                                                                                                        |                   |                                  |             |             | <u>Odds ratio and 95% CI</u> |         |                                       |  |                                       |             |                     |                |          |             |                |         |         |       |                |       |       |                  |        |       |         |       |       |           |        |       |       |        |       |        |       |  |       |       |       |        |       |       |       |
|                                     | Odds ratio                                                                                                                                                                                                                                                                                                                                                                                                                                                                                                                                                                                                                                                                                                                                                                                                                              | Lower limit       | Upper limit                      | Z-Value     | p-Value     |                              |         |                                       |  |                                       |             |                     |                |          |             |                |         |         |       |                |       |       |                  |        |       |         |       |       |           |        |       |       |        |       |        |       |  |       |       |       |        |       |       |       |
| Dieleman, 2009                      | 1.064                                                                                                                                                                                                                                                                                                                                                                                                                                                                                                                                                                                                                                                                                                                                                                                                                                   | 0.346             | 3.277                            | 0.109       | 0.913       |                              |         |                                       |  |                                       |             |                     |                |          |             |                |         |         |       |                |       |       |                  |        |       |         |       |       |           |        |       |       |        |       |        |       |  |       |       |       |        |       |       |       |
| Lachmann, 2018                      | 1.623                                                                                                                                                                                                                                                                                                                                                                                                                                                                                                                                                                                                                                                                                                                                                                                                                                   | 0.788             | 3.345                            | 1.313       | 0.189       |                              |         |                                       |  |                                       |             |                     |                |          |             |                |         |         |       |                |       |       |                  |        |       |         |       |       |           |        |       |       |        |       |        |       |  |       |       |       |        |       |       |       |
|                                     | 1.435                                                                                                                                                                                                                                                                                                                                                                                                                                                                                                                                                                                                                                                                                                                                                                                                                                   | 0.781             | 2.636                            | 1.164       | 0.245       |                              |         |                                       |  |                                       |             |                     |                |          |             |                |         |         |       |                |       |       |                  |        |       |         |       |       |           |        |       |       |        |       |        |       |  |       |       |       |        |       |       |       |
| Sex (male)                          | <table border="1"> <thead> <tr> <th><u>Study name</u></th> <th colspan="5"><u>Statistics for each study</u></th> <th><u>Odds ratio and 95% CI</u></th> </tr> <tr> <th></th> <th>Odds ratio</th> <th>Lower limit</th> <th>Upper limit</th> <th>Z-Value</th> <th>p-Value</th> <th></th> </tr> </thead> <tbody> <tr> <td>Dieleman, 2009</td> <td>0.819</td> <td>0.365</td> <td>1.837</td> <td>-0.485</td> <td>0.628</td> <td rowspan="3"> </td> </tr> <tr> <td>Kok, 2017</td> <td>5.230</td> <td>0.271</td> <td>101.100</td> <td>1.095</td> <td>0.274</td> </tr> <tr> <td></td> <td>1.170</td> <td>0.279</td> <td>4.906</td> <td>0.215</td> <td>0.830</td> </tr> </tbody> </table>                                                                                                                                                         | <u>Study name</u> | <u>Statistics for each study</u> |             |             |                              |         | <u>Odds ratio and 95% CI</u>          |  | Odds ratio                            | Lower limit | Upper limit         | Z-Value        | p-Value  |             | Dieleman, 2009 | 0.819   | 0.365   | 1.837 | -0.485         | 0.628 |       | Kok, 2017        | 5.230  | 0.271 | 101.100 | 1.095 | 0.274 |           | 1.170  | 0.279 | 4.906 | 0.215  | 0.830 |        |       |  |       |       |       |        |       |       |       |
| <u>Study name</u>                   | <u>Statistics for each study</u>                                                                                                                                                                                                                                                                                                                                                                                                                                                                                                                                                                                                                                                                                                                                                                                                        |                   |                                  |             |             | <u>Odds ratio and 95% CI</u> |         |                                       |  |                                       |             |                     |                |          |             |                |         |         |       |                |       |       |                  |        |       |         |       |       |           |        |       |       |        |       |        |       |  |       |       |       |        |       |       |       |
|                                     | Odds ratio                                                                                                                                                                                                                                                                                                                                                                                                                                                                                                                                                                                                                                                                                                                                                                                                                              | Lower limit       | Upper limit                      | Z-Value     | p-Value     |                              |         |                                       |  |                                       |             |                     |                |          |             |                |         |         |       |                |       |       |                  |        |       |         |       |       |           |        |       |       |        |       |        |       |  |       |       |       |        |       |       |       |
| Dieleman, 2009                      | 0.819                                                                                                                                                                                                                                                                                                                                                                                                                                                                                                                                                                                                                                                                                                                                                                                                                                   | 0.365             | 1.837                            | -0.485      | 0.628       |                              |         |                                       |  |                                       |             |                     |                |          |             |                |         |         |       |                |       |       |                  |        |       |         |       |       |           |        |       |       |        |       |        |       |  |       |       |       |        |       |       |       |
| Kok, 2017                           | 5.230                                                                                                                                                                                                                                                                                                                                                                                                                                                                                                                                                                                                                                                                                                                                                                                                                                   | 0.271             | 101.100                          | 1.095       | 0.274       |                              |         |                                       |  |                                       |             |                     |                |          |             |                |         |         |       |                |       |       |                  |        |       |         |       |       |           |        |       |       |        |       |        |       |  |       |       |       |        |       |       |       |
|                                     | 1.170                                                                                                                                                                                                                                                                                                                                                                                                                                                                                                                                                                                                                                                                                                                                                                                                                                   | 0.279             | 4.906                            | 0.215       | 0.830       |                              |         |                                       |  |                                       |             |                     |                |          |             |                |         |         |       |                |       |       |                  |        |       |         |       |       |           |        |       |       |        |       |        |       |  |       |       |       |        |       |       |       |
| Hypertension                        | <table border="1"> <thead> <tr> <th><u>Study name</u></th> <th colspan="5"><u>Statistics for each study</u></th> <th><u>Odds ratio and 95% CI</u></th> </tr> <tr> <th></th> <th>Odds ratio</th> <th>Lower limit</th> <th>Upper limit</th> <th>Z-Value</th> <th>p-Value</th> <th></th> </tr> </thead> <tbody> <tr> <td>Dieleman, 2009</td> <td>1.612</td> <td>0.758</td> <td>3.427</td> <td>1.241</td> <td>0.215</td> <td rowspan="3"> </td> </tr> <tr> <td>Lachmann, 2018</td> <td>1.163</td> <td>0.685</td> <td>1.975</td> <td>0.560</td> <td>0.576</td> </tr> <tr> <td></td> <td>1.296</td> <td>0.840</td> <td>1.998</td> <td>1.171</td> <td>0.241</td> </tr> </tbody> </table>                                                                                                                                                       | <u>Study name</u> | <u>Statistics for each study</u> |             |             |                              |         | <u>Odds ratio and 95% CI</u>          |  | Odds ratio                            | Lower limit | Upper limit         | Z-Value        | p-Value  |             | Dieleman, 2009 | 1.612   | 0.758   | 3.427 | 1.241          | 0.215 |       | Lachmann, 2018   | 1.163  | 0.685 | 1.975   | 0.560 | 0.576 |           | 1.296  | 0.840 | 1.998 | 1.171  | 0.241 |        |       |  |       |       |       |        |       |       |       |
| <u>Study name</u>                   | <u>Statistics for each study</u>                                                                                                                                                                                                                                                                                                                                                                                                                                                                                                                                                                                                                                                                                                                                                                                                        |                   |                                  |             |             | <u>Odds ratio and 95% CI</u> |         |                                       |  |                                       |             |                     |                |          |             |                |         |         |       |                |       |       |                  |        |       |         |       |       |           |        |       |       |        |       |        |       |  |       |       |       |        |       |       |       |
|                                     | Odds ratio                                                                                                                                                                                                                                                                                                                                                                                                                                                                                                                                                                                                                                                                                                                                                                                                                              | Lower limit       | Upper limit                      | Z-Value     | p-Value     |                              |         |                                       |  |                                       |             |                     |                |          |             |                |         |         |       |                |       |       |                  |        |       |         |       |       |           |        |       |       |        |       |        |       |  |       |       |       |        |       |       |       |
| Dieleman, 2009                      | 1.612                                                                                                                                                                                                                                                                                                                                                                                                                                                                                                                                                                                                                                                                                                                                                                                                                                   | 0.758             | 3.427                            | 1.241       | 0.215       |                              |         |                                       |  |                                       |             |                     |                |          |             |                |         |         |       |                |       |       |                  |        |       |         |       |       |           |        |       |       |        |       |        |       |  |       |       |       |        |       |       |       |
| Lachmann, 2018                      | 1.163                                                                                                                                                                                                                                                                                                                                                                                                                                                                                                                                                                                                                                                                                                                                                                                                                                   | 0.685             | 1.975                            | 0.560       | 0.576       |                              |         |                                       |  |                                       |             |                     |                |          |             |                |         |         |       |                |       |       |                  |        |       |         |       |       |           |        |       |       |        |       |        |       |  |       |       |       |        |       |       |       |
|                                     | 1.296                                                                                                                                                                                                                                                                                                                                                                                                                                                                                                                                                                                                                                                                                                                                                                                                                                   | 0.840             | 1.998                            | 1.171       | 0.241       |                              |         |                                       |  |                                       |             |                     |                |          |             |                |         |         |       |                |       |       |                  |        |       |         |       |       |           |        |       |       |        |       |        |       |  |       |       |       |        |       |       |       |
| <b>Pre-Operative (Continuous)</b>   |                                                                                                                                                                                                                                                                                                                                                                                                                                                                                                                                                                                                                                                                                                                                                                                                                                         |                   |                                  |             |             |                              |         |                                       |  |                                       |             |                     |                |          |             |                |         |         |       |                |       |       |                  |        |       |         |       |       |           |        |       |       |        |       |        |       |  |       |       |       |        |       |       |       |
| Age (years)                         | <table border="1"> <thead> <tr> <th><u>Study name</u></th> <th colspan="7"><u>Statistics for each study</u></th> <th><u>Difference in means and 95% CI</u></th> </tr> <tr> <th></th> <th>Difference in means</th> <th>Standard error</th> <th>Variance</th> <th>Lower limit</th> <th>Upper limit</th> <th>Z-Value</th> <th>p-Value</th> <th></th> </tr> </thead> <tbody> <tr> <td>Dieleman, 2009</td> <td>3.300</td> <td>1.730</td> <td>2.992</td> <td>-0.090</td> <td>6.690</td> <td>1.908</td> <td>0.056</td> <td rowspan="3"> </td> </tr> <tr> <td>Kok, 2017</td> <td>-1.500</td> <td>3.073</td> <td>9.444</td> <td>-7.523</td> <td>4.523</td> <td>-0.488</td> <td>0.625</td> </tr> <tr> <td></td> <td>1.572</td> <td>2.304</td> <td>5.308</td> <td>-2.944</td> <td>6.088</td> <td>0.682</td> <td>0.495</td> </tr> </tbody> </table> | <u>Study name</u> | <u>Statistics for each study</u> |             |             |                              |         |                                       |  | <u>Difference in means and 95% CI</u> |             | Difference in means | Standard error | Variance | Lower limit | Upper limit    | Z-Value | p-Value |       | Dieleman, 2009 | 3.300 | 1.730 | 2.992            | -0.090 | 6.690 | 1.908   | 0.056 |       | Kok, 2017 | -1.500 | 3.073 | 9.444 | -7.523 | 4.523 | -0.488 | 0.625 |  | 1.572 | 2.304 | 5.308 | -2.944 | 6.088 | 0.682 | 0.495 |
| <u>Study name</u>                   | <u>Statistics for each study</u>                                                                                                                                                                                                                                                                                                                                                                                                                                                                                                                                                                                                                                                                                                                                                                                                        |                   |                                  |             |             |                              |         | <u>Difference in means and 95% CI</u> |  |                                       |             |                     |                |          |             |                |         |         |       |                |       |       |                  |        |       |         |       |       |           |        |       |       |        |       |        |       |  |       |       |       |        |       |       |       |
|                                     | Difference in means                                                                                                                                                                                                                                                                                                                                                                                                                                                                                                                                                                                                                                                                                                                                                                                                                     | Standard error    | Variance                         | Lower limit | Upper limit | Z-Value                      | p-Value |                                       |  |                                       |             |                     |                |          |             |                |         |         |       |                |       |       |                  |        |       |         |       |       |           |        |       |       |        |       |        |       |  |       |       |       |        |       |       |       |
| Dieleman, 2009                      | 3.300                                                                                                                                                                                                                                                                                                                                                                                                                                                                                                                                                                                                                                                                                                                                                                                                                                   | 1.730             | 2.992                            | -0.090      | 6.690       | 1.908                        | 0.056   |                                       |  |                                       |             |                     |                |          |             |                |         |         |       |                |       |       |                  |        |       |         |       |       |           |        |       |       |        |       |        |       |  |       |       |       |        |       |       |       |
| Kok, 2017                           | -1.500                                                                                                                                                                                                                                                                                                                                                                                                                                                                                                                                                                                                                                                                                                                                                                                                                                  | 3.073             | 9.444                            | -7.523      | 4.523       | -0.488                       | 0.625   |                                       |  |                                       |             |                     |                |          |             |                |         |         |       |                |       |       |                  |        |       |         |       |       |           |        |       |       |        |       |        |       |  |       |       |       |        |       |       |       |
|                                     | 1.572                                                                                                                                                                                                                                                                                                                                                                                                                                                                                                                                                                                                                                                                                                                                                                                                                                   | 2.304             | 5.308                            | -2.944      | 6.088       | 0.682                        | 0.495   |                                       |  |                                       |             |                     |                |          |             |                |         |         |       |                |       |       |                  |        |       |         |       |       |           |        |       |       |        |       |        |       |  |       |       |       |        |       |       |       |
| <b>Intra-Operative (Continuous)</b> |                                                                                                                                                                                                                                                                                                                                                                                                                                                                                                                                                                                                                                                                                                                                                                                                                                         |                   |                                  |             |             |                              |         |                                       |  |                                       |             |                     |                |          |             |                |         |         |       |                |       |       |                  |        |       |         |       |       |           |        |       |       |        |       |        |       |  |       |       |       |        |       |       |       |

Number of grafts

| Study name     | Statistics for each study |                |          |             |             |         |         | Difference in means and 95% CI |
|----------------|---------------------------|----------------|----------|-------------|-------------|---------|---------|--------------------------------|
|                | Difference in means       | Standard error | Variance | Lower limit | Upper limit | Z-Value | p-Value |                                |
| Dieleman, 2009 | 0.047                     | 0.192          | 0.037    | -0.330      | 0.424       | 0.243   | 0.808   |                                |
| Kok, 2017      | 0.008                     | 0.249          | 0.062    | -0.480      | 0.496       | 0.034   | 0.973   |                                |
|                | 0.032                     | 0.152          | 0.023    | -0.266      | 0.331       | 0.213   | 0.832   |                                |
